# Supplementary material for: SAM transmethylation pathway and adenosine recycling to ATP are essential for systemic regulation and immune response
Source: bioRxiv preprint, doi:10.1101/2024.11.13.623428, version 2 (2025-01-29)
Supplement: S2_Data [file 623428_file03.xlsx]

## Sheet: List of Metabolites
Metabolite Characterization				HPLC/HRMS Parameters			Metabolite Identification
							Match with standard			Match with online librery***
Metabolity full name	Elemental composition	KEGG ID	**Teoretic accurate mass	Ionization Mode	*Chemical standard	Retention time [min]	**Accurate mass match (< 3ppm)	RT match	MS/MS match	**Accurate mass match (< 3ppm)	Spectrum match
Metabolites for BiologiIal interpretation
Adenosine	C10H13N5O4	C00212	266.089	NESI	Yes	5.7	Yes	Yes	Yes	-	-
Inosine	C10H12N4O5	C00294	267.073	NESI	Yes	7.3	Yes	Yes	Yes	-	-
Adenosine 5'-triphospate	C10H16N5O13P3	C00002	505.988	NESI	Yes	11.9	Yes	Yes	Yes	-	-
Adenosine 5'-diphosphate	C10H15N5O10P2	C00008	426.022	NESI	Yes	10.6	Yes	Yes	Yes	-	-
Adenosine 5'-monophosphate	C10H14N5O7P	C00020	346.056	NESI	Yes	9.7	Yes	Yes	Yes	-	-
Inosine monophosphate	C10H13N4O8P	C00130	347.04	NESI	Yes	10.8	Yes	Yes	Yes	-	-
L-Methionine	C5H11NO2S	C00073	148.044	NESI	Yes	7.4	Yes	Yes	Yes	-	-
S-Adenosylmethionine	C15H22N6O5S	C00019	399.145	PESI,NESI	Yes	10.7	Yes	Yes	Yes	-	-
S-Adenosylhomocysteine	C14H20N6O5S	C00021	383.114	NESI	Yes	8.8	Yes	Yes	Yes	-	-
5-Methylthioadenosine	C11H15N5O3S	C00170	298.097	PESI, NESI	No	3.9	No	No	No	Yes	Yes
L-Cystathionine	C7H14N2O4S	C02291	223.07470; 221.06015	PESI, NESI	Yes	11.5	Yes	Yes	Yes	-	-
Metabolites for normalization
Adenine	C5H5N5	C00147	134.047	NESI	Yes	6	Yes	Yes	Yes	-	-
Guanosine 5'-triphospahte	C10H16N5O14P3	C00044	521.983	NESI	Yes	11.3	Yes	Yes	Yes	-	-
Guanosine diphospate	C10H15N5O11P2	C00035	442.017	NESI	Yes	12.8	Yes	Yes	Yes	-	-
Guanosine 3'-monophospahte	C10H14N5O8P	C06193	362.051	NESI	No	9.9	No	No	No	Yes	Yes
Guanosine 5'-monophospahte	C10H14N5O8P	C00144	362.051	NESI	No	11.8	No	No	No	Yes	Yes
Guanosine	C10H13N5O5	C00387	282.084	NESI	Yes	8.6	Yes	Yes	Yes	-	-
Guanine	C5H5N5O	C00242	150.042	NESI	Yes	8.3	Yes	Yes	Yes	-	-
Xanthine	C5H4N4O2	C00385	151.026	NESI	Yes	8	Yes	Yes	Yes	-	-
Hypoxanthine	C5H4N4O	C00262	135.031	NESI	Yes	6.8	Yes	Yes	Yes	-	-
Uric acid	C5H4N4O3	C00366	167.021	NESI	Yes	8.4	Yes	Yes	Yes	-	-
L-Aspartic acid	C4H7NO4	C00049	132.03	NESI	Yes	10.4	Yes	Yes	Yes	-	-
Fumaric acid	C4H4O4	C00122	115.004	NESI	Yes	11.5	Yes	Yes	Yes	-	-
D- and L-Glutamic acid	C5H9NO4	C00217/C00025	146.046	NESI	Yes/Yes	10	Yes	Yes	Yes	-	-
L-Proline	C5H9NO2	C00148	116.071	PESI	Yes	8.5	Yes	Yes	Yes	-	-
Glycine betaine (Betaine)	C5H11NO2	C00719	118.086	PESI	Yes	7.2	Yes	Yes	Yes	-	-
Glycine	C2H5NO2	C00037	74.0247	NESI	Yes	10.6	Yes	Yes	Yes	-	-
Choline	C5H13NO	C00114	104.107	PESI	Yes	13.5	Yes	Yes	Yes	-	-
Betaine aldehyde	C5H12NO	C00576	103.099	PESI	Yes	16.7	Yes	Yes	Yes	-	-
Sarcosine	C3H7NO2	C00213	90.055	PESI	Yes	9.6	Yes	Yes	Yes	-	-
L-Cysteine/L-Cystine	C3H7NO2S	C00097	120.012	NESI	Yes	11	Yes	Yes	Yes	-	-
gamma-Glutamylcysteine	C8H14N2O5S	C00669	251.07	PESI	Yes	9.3	Yes	Yes	Yes	-	-
L-Arginine	C6H14N4O2	C00062	175.119	PESI	Yes	17	Yes	Yes	Yes	-	-
L-Ornithine	C5H12N2O2	C00077	133.097	PESI	Yes	15.1	Yes	Yes	Yes	-	-
Taurine	C2H7O3NS	C00245	124.007	NESI	Yes	10	Yes	Yes	Yes	-	-
Cysteic acid	C3H7NO5S	C00506	167.997	NESI	Yes	11.1	Yes	Yes	Yes	-	-
5-Glutamylcystine	C16H26N4O10S2	C03646	499.11631; 497.10176	PESI, NESI	No	15	No	No	No	Yes	Yes
O-Acetylserine	C5H9NO4	C00979	146.046	PESI	Yes	7.3	Yes	Yes	Yes	-	-
S-Sulfocysteine	C3H7NO5S2	C05824	199.969	NESI	No	11.7	No	No	No	Yes	Yes
L-Cystine	C6H12N2O4S2	C00491	239.017	NESI	Yes	10.9	Yes	Yes	Yes	-	-
L-Glutathione oxidized	C20H32N6O12S2	C00127	613.159	PESI	Yes	12.1	Yes	Yes	Yes	-	-
Cysteineglutathione disulfide	C13H22N4O8S2	C05526	427.095	PESI	No	11.2	No	No	No	Yes	Yes
Sulfolactic acid	C3H6O6S	C11499	168.981	NESI	No	12.7	No	No	No	Yes	Yes
D- and L-2-Aminobutyric acid	C4H9NO2	C02261/C02356	104.071	PESI	Yes/Yes	9.2	Yes	Yes	Yes	-	-
4-Glutamyl-aminobutanoic acid	C9H16N2O5	C15767	231.099	NESI	No	5.5	No	No	No	Yes	Yes
Cysteinesulfinic acid	C3H7NO4S	C00606	154.01685; 152.00230	PESI, NESI	No	6.8	No	No	No	Yes	Yes
Pyruvic acid	C3H4O3	C00022	87.0088	NESI	Yes	5.5	Yes	Yes	Yes	-	-
Mercapturic acid	C5H9NO3S	C06809	162.023	NESI	No	5	No	No	No	Yes	Yes
Methionine oxide	C5H11NO3S	C02989	166.053	PESI	Yes	8.5	Yes	Yes	Yes	-	-
N-Formylmethionine	C6H11NO3S	C03145	176.039	NESI	No	4.2	No	No	No	Yes	Yes
Phosphoric acid	H3PO4	C00009	96.9696	NESI	Yes	11.3	Yes	Yes	Yes	-	-
Dimethylsulfoniopropylaldehyde	C6H12O1S1	NA	131.054	NESI	No	9.6	No	No	No	Yes	Yes
S-Dimethylsulfoniumpropionic acid	C5H10O2S	C04022	133.033	NESI	Yes	10.4	Yes	Yes	Yes	-	-
Acrylic acid	C3H4O2	C00511	71.0139	NESI	Yes	3.3	Yes	Yes	Yes	-	-
Malonaldehyde	C3H4O2	C19440	71.0139	NESI	Yes	5.6	Yes	Yes	Yes	-	-
L-Serine	C3H7NO3	C00065	104.035	NESI	Yes	10.6	Yes	Yes	Yes	-	-
O-Phospho-L-serine	C3H8NO6P	C01005	184.002	NESI	Yes	11.5	Yes	Yes	Yes	-	-
3-Phosphohydroxypyruvic acid	C3H5O7P	C03232	182.97	NESI	No	11.2	No	No	No	Yes	Yes
2 and 3-Phosphoglyceric acid	C3H7O7P	C00631/C00597	184.986	NESI	Yes/Yes	11.9	Yes	Yes	Yes	-	-
L-Threonine	C4H9NO3	C00188	118.051	NESI	Yes	9.8	Yes	Yes	Yes	-	-
O-Phospho-L-threonine	C4H10NO6P	C12147	200.032	PESI	Yes	11.4	Yes	Yes	Yes	-	-
N4-Acetyl-L-2,4-diaminobutanoic acid	C6H12N2O3	C06442	159.078	NESI	No	7.2	No	No	No	Yes	Yes
3-Aminopropionaldehyde	C3H7NO	C05665	72.0455	NESI	No	9.6	No	No	No	Yes	Yes
Carbamoyl-3-alanine	C4H8N2O3	C02642	131.046	NESI	No	8.6	No	No	No	Yes	Yes
Dihydrouracil	C4H6N2O2	C00429	113.036	NESI	No	10.3	No	No	No	Yes	Yes
Pantothenic acid, vitamin B5	C9H17NO5	C00864	218.103	NESI	Yes	5.3	Yes	Yes	Yes	-	-
4-Phosphopantothenic acid	C9H18NO8P	C03492	298.07	NESI	No	10.8	No	No	No	Yes	Yes
D-(+) and L-(-)-Glyceraldehyde	C3H6O3	C00577/C02426	89.0244	NESI	No	11.1	No	No	No	Yes	Yes
Argininosuccinic acid	C10H18N4O6	C03406	291.13	PESI	Yes	11.6	Yes	Yes	Yes	-	-
L-Aspartate-semialdehyde	C4H7NO3	C00441	116.035	NESI	No	6.7	No	No	No	Yes	Yes
4-Phospho-L-aspartic acid	C4H8NO7P	NA	211.997	NESI	No	10.5	No	No	No	Yes	Yes
N-Acetylaspartic acid	C6H9NO5	C01042	174.041	NESI	Yes	10.3	Yes	Yes	Yes	-	-
Phosphohomoserine	C4H10NO6P	C01102	200.032	PESI	Yes	11.4	Yes	Yes	Yes	-	-
D-Glyceraldehyde-3-phosphate	C3H7O6P	C00118	168.991	NESI	Yes	11.2	Yes	Yes	Yes	-	-
Acetyl-CoA	C25H40N7O18P3S	C00332	850.129	NESI	No	4	No	No	No	Yes	Yes
Citric acid	C6H8O7	C00158	129.019	NESI	Yes	12.8	Yes	Yes	Yes	-	-
cis-Aconitic acid	C6H6O6	C00417	173.009	NESI	Yes	12.6	Yes	Yes	Yes	-	-
trans-Aconitic acid	C6H6O6	C02341	173.009	NESI	Yes	13.6	Yes	Yes	Yes	-	-
Itaconic acid	C5H6O4	C00490	129.019	NESI	Yes	10.7	Yes	Yes	Yes	-	-
2-Oxoglutaric acid	C5H6O5	C00026	145.014	NESI	Yes	11	Yes	Yes	Yes	-	-
Succinic acid	C4H6O4	C00042	117.019	NESI	Yes	10.6	Yes	Yes	Yes	-	-
Malic acid	C4H6O5	C00149	133.014	NESI	Yes	11.3	Yes	Yes	Yes	-	-
Oxaloacetic acid	C4H4O5	C00036	130.999	NESI	Yes	12.3	Yes	Yes	Yes	-	-
2-Amino-3-oxoadipic acid	C6H9NO5	C05520	174.041	NESI	No	10.5	No	No	No	Yes	-
2 and 3-Hydroxyglutaric acid	C5H8O5	C03196	147.03	NESI	Yes/Yes	10.8	Yes	Yes	Yes	-	-
L-Glutamine	C5H10N2O3	C00064	145.062	NESI	Yes	10.2	Yes	Yes	Yes	-	-
L-Tyrosine	C9H11NO3	C00082	180.067	NESI	Yes	8.2	Yes	Yes	Yes	-	-
L-Phenylalanine	C9H11NO2	C00079	166.086	PESI	Yes	6.3	Yes	Yes	Yes	-	-
L-Valine	C5H11NO2	C00183	116.072	NESI	Yes	8.4	Yes	Yes	Yes	-	-
Acetoacetic acid	C4H6O3	C00164	101.024	NESI	Yes	5.3	Yes	Yes	Yes	-	-
Coenzyme A	C21H36N7O16P3S	C00010	768.122	PESI	No	9	No	No	No	Yes	Yes
L-Asparagine	C4H8N2O3	C00152	131.046	NESI	Yes	10.2	Yes	Yes	Yes	-	-
Phosphocholine	C5H14NO4P	1565	184.073	PESI	No	10	No	No	No	Yes	Yes
Acetylcholine	C7H15NO2	C01996	146.118	PESI	Yes	10.8	Yes	Yes	Yes	-	-
L-Alanine	C3H7NO2	C00041	90.055	PESI	Yes	9.9	Yes	Yes	Yes	-	-
beta-Alanine	C3H7NO2	C00099	90.055	PESI	Yes	10.3	Yes	Yes	Yes	-	-
L-Leucine	C6H13NO2	C00123	132.102	PESI	Yes	6.8	Yes	Yes	Yes	-	-
L-Isoleucine	C6H13NO2	C00407	132.102	PESI,	Yes	7.2	Yes	Yes	Yes	-	-
L-Glutathione reduced	C10H17N3O6S	C00051	308.091	PESI	Yes	10	Yes	Yes	Yes	-	-
L-Homoserine	C4H9NO3	C00263	118.051	NESI	Yes	10.4	Yes	Yes	Yes	-	-
Phosphoserine	C3H8NO6P	C01005	184.002	NESI	Yes	11.5	Yes	Yes	Yes	-	-
* Chemicl standards present in the our laboratory (Laboratory of Analytical Biochemistry and Metabolomics, Institute of Entomology, Biology Centre, Czech Academy of Sciences, České Budějovice, Czech Republic)
** Acurate mass for [M+H]+ or [M-H]-
*** METLIN (https://metlin.scripps.edu/landing_page.php?pgcontent=mainPage); https://hmdb.ca/; https://massbank.eu/MassBank/Search

## Sheet: S1
	Experiment:	Peak area Ahcy RNAi
	Internal Code:	200909_03
	Tested groups:	Control Uninfected	BDSC 36304 x SrpGal4Gal80
		Control Infected
		Ahcy RNAi Uninfected	BDSC 67848 x SrpGal4Gal80
		Ahcy RNAi Infected
	Raw data name	Raw data	Adenosine	Adenine	Inosine	Adenosine 5'-triphospate	Adenosine 5'-diphosphate	Adenosine 5'-monophosphate	Inosine monophosphate	Guanosine diphospate	Guanosine 5'-monophospahte	Guanosine	Xanthine	Hypoxanthine	Uric acid	L-Aspartic acid	Fumaric acid	D- and L-Glutamic acid	L-Proline	L-Methionine	S-Adenosylmethionine	S-Adenosylhomocysteine	Betaine	Glycine	Choline	Betaine aldehyde_1	Betaine aldehyde_2	Sarcosine	L-Cystathionine	gamma-Glutamylcysteine	L-Arginine	L-Ornithine	Taurine	Cysteic acid	0-Acetylserine	S-Sulfocysteine	L-Cystine	L-Glutathione oxidized	Cysteineglutathione disulfide	4-Glutamyl-aminobutanoic acid	Pyruvic acid	Methionine oxide	N-Formylmethionine	5-Methylthioadenosine	Dimethylsulfoniopropylaldehyde	S-Dimethylsulfoniumpropionic acid	Acrylic acid	Malonaldehyde	L-Serine
	CC	Control Uninfected	697850	2.39372e+06	2.05049e+07	3.37997e+06	9.85778e+06	4.35067e+07	796820	267914	595347	3.88413e+06	3.12509e+07	2.47562e+06	3.53489e+08	8.73326e+08	3.65436e+08	1.9556e+09	2.31513e+09	4.22746e+06	4.22764e+07	250092	1.81705e+10	1.15074e+07	2.03958e+07	4.726e+06	2.95998e+08	1.35185e+08	1.59788e+06	4.82365e+06	1.72442e+08	1.3924e+08	7.85437e+07	1.7707e+06	1.47608e+09	3.26688e+07	1.03554e+07	2.03936e+07	2.90066e+06	1.14934e+06	2.00978e+06	3.03488e+09	1.57803e+06	1.16082e+07	226621	1.20664e+06	1.28729e+07	3.56013e+07	1.35422e+08
			1.82241e+06	5.31001e+06	1.36839e+08	4.42377e+06	1.97102e+07	8.90283e+07	4.90106e+06	782700	1.65123e+06	1.75967e+07	1.95668e+08	2.66692e+07	4.80353e+09	1.53895e+09	6.51176e+08	4.89118e+09	5.09207e+09	2.80712e+08	1.36809e+08	5.71428e+06	4.38778e+10	3.20302e+07	8.95419e+07	1.10307e+07	5.47646e+08	3.33434e+08	1.32734e+07	6.72208e+06	3.64653e+08	3.38433e+08	1.35348e+08	183030	2.13662e+09	3.34614e+07	2.50811e+07	2.96e+06	3.17855e+07	1.27426e+06	3.11764e+07	3.32484e+09	2.07939e+06	1.18356e+07	229395	1.73075e+07	1.67111e+07	4.21048e+07	1.42711e+08
			31946.1	2.75527e+06	1.24109e+07	8.36708e+06	1.1251e+07	4.78912e+07	1.5306e+06	332934	581123	4.09107e+06	4.46196e+07	2.81612e+06	2.04904e+09	6.49263e+08	4.58309e+08	1.36312e+09	3.02951e+09	1.6021e+08	6.40042e+07	1.29938e+06	2.76265e+10	2.02513e+07	1.96996e+07	6.02837e+06	3.84201e+08	2.52144e+08	6.89031e+06	2.92285e+06	2.15735e+08	1.81634e+08	1.09683e+08	2.74245e+06	2.39595e+09	3.49869e+07	3.32805e+06	3.29609e+07	3.43594e+07	1.30693e+06	4.63475e+07	3.84288e+09	5.39392e+07	2.58425e+07	33612.1	2.56649e+06	1.94048e+07	4.59289e+07	1.69587e+08
			1.72539e+06	8.31696e+06	1.19088e+08	2.64648e+06	1.42067e+07	1.08394e+08	1.94775e+06	330885	1.92167e+06	1.95406e+07	1.41368e+08	1.76183e+07	1.59607e+09	1.24818e+09	6.34686e+08	3.63452e+09	5.43194e+09	2.25991e+08	1.03078e+08	4.26568e+06	3.2271e+10	2.65184e+07	6.66314e+07	1.05037e+07	4.45219e+08	3.2614e+08	8.9889e+06	5.70643e+06	3.63841e+08	2.11478e+08	3.15039e+08	4.80724e+06	3.66001e+09	3.53333e+07	4.21832e+06	4.71716e+06	5.31154e+06	3.55855e+06	5.52982e+06	4.70029e+09	6.57975e+06	2.63705e+07	63348	4.70546e+06	2.03879e+07	4.87685e+07	2.44348e+08
			612264	5.68885e+06	1.81814e+07	5.27745e+06	1.70834e+07	1.56464e+08	1.33139e+06	608081	1.80385e+06	7.06246e+06	4.52351e+07	3.1758e+06	5.39528e+08	6.70445e+08	4.183e+08	1.84972e+09	2.98938e+09	2.639e+07	7.03059e+07	706289	2.47928e+10	1.5303e+07	2.33634e+07	7.27436e+06	3.14948e+08	2.03541e+08	4.26222e+06	4.97498e+06	2.24703e+08	1.17833e+08	2.35387e+08	5000	4.91315e+09	4.34442e+07	8.10771e+06	5.58032e+06	5.8034e+06	5.25641e+06	705763	5.77627e+09	5000	7.10402e+06	5000	7.19278e+06	8.24156e+06	6.37494e+07	2.64078e+08
	CI	Control Infected	38524.5	3.20185e+06	5.08372e+06	1.72427e+07	4.38846e+07	1.47375e+08	1.26007e+06	1.56537e+06	2.00991e+06	1.86802e+06	1.60502e+07	791036	3.93991e+08	1.08378e+09	1.89957e+08	2.67122e+09	1.85742e+09	3.46779e+07	5.05211e+07	167718	9.01744e+09	8.33887e+06	2.58334e+07	5.02706e+06	1.28637e+08	9.8529e+07	5.92027e+06	3.71667e+06	1.06335e+08	1.04455e+08	1.91679e+08	1.4109e+06	2.23919e+09	1.59445e+07	1.26683e+07	1.19962e+07	1.01675e+07	1.44329e+06	1.19799e+07	1.6949e+09	1.65092e+06	1.15229e+07	107251	4.26625e+06	3.45935e+06	2.28374e+07	1.40882e+08
			65988.2	3.21474e+06	1.1095e+07	1.62862e+07	4.32891e+07	1.32852e+08	1.8956e+06	1.77577e+06	1.99366e+06	3.78355e+06	2.41338e+07	1.67256e+06	7.50622e+08	1.1327e+09	3.16566e+08	3.10351e+09	3.32017e+09	7.4487e+07	6.83379e+07	332223	1.57588e+10	1.53301e+07	3.57012e+07	8.28892e+06	2.28781e+08	1.55395e+08	7.8438e+06	2.29133e+06	1.76212e+08	1.59346e+08	2.34425e+08	211051	2.67776e+09	3.28304e+07	3.21789e+06	1.41783e+07	1.84448e+07	1.47838e+06	1.32538e+06	2.23422e+09	2.95231e+06	1.19427e+07	111716	4.74654e+06	4.49137e+06	3.44945e+07	1.58627e+08
			76738.1	2.89483e+06	1.10958e+07	1.17939e+07	3.51335e+07	1.08035e+08	3.19807e+06	1.48413e+06	1.64532e+06	3.95881e+06	2.05522e+07	1.36795e+06	7.42216e+08	1.03714e+09	3.52891e+08	2.23205e+09	3.38246e+09	8.22966e+07	7.49861e+07	351837	1.69562e+10	1.7541e+07	3.80038e+07	8.40724e+06	2.56801e+08	1.84229e+08	9.74404e+06	2.72519e+06	1.89951e+08	1.79379e+08	2.62645e+08	378328	2.70012e+09	4.33681e+07	3.97423e+06	1.73245e+07	5.00417e+06	1.55885e+06	1.84786e+06	2.24885e+09	4.36579e+06	1.24538e+07	195564	6.00746e+06	4.58543e+06	3.53499e+07	1.59739e+08
			30659.4	3.39308e+06	1.26316e+07	1.27289e+07	3.71597e+07	1.32179e+08	4.03143e+06	1.70195e+06	2.4566e+06	5.76436e+06	2.99695e+07	2.31146e+06	1.33441e+09	9.43655e+08	5.01792e+08	2.68692e+09	5.12516e+09	1.0362e+08	7.89299e+07	241558	2.22413e+10	2.07944e+07	3.78052e+07	8.52938e+06	2.98778e+08	1.57739e+08	9.41137e+06	1.84726e+06	2.39999e+08	2.13175e+08	2.4345e+08	5000	3.32526e+09	5.18505e+07	7.5532e+06	1.74135e+07	7.82054e+06	2.20208e+06	5.22123e+06	2.58515e+09	4.68868e+06	1.36522e+07	96982.8	8.6237e+06	9.10482e+06	3.72229e+07	1.79955e+08
			102493	4.18554e+06	1.18121e+07	2.00373e+07	4.76302e+07	1.43038e+08	2.95236e+06	2.57026e+06	2.71443e+06	3.68358e+06	3.15521e+07	1.92709e+06	6.33877e+08	1.13072e+09	3.94407e+08	3.3158e+09	3.45631e+09	1.25438e+07	7.33281e+07	128994	1.6918e+10	1.44209e+07	4.19631e+07	8.10556e+06	2.01779e+08	1.37633e+08	5.28393e+06	6.13428e+06	1.77969e+08	1.3229e+08	2.58528e+08	5000	3.38277e+09	5.82114e+07	9.56915e+06	1.84838e+07	7.88315e+06	793116	8.85393e+06	2.71117e+09	8.0567e+06	1.4381e+07	5000	9.90713e+06	9.72848e+06	4.79149e+07	2.2037e+08
	RC	Ahcy RNAi Uninfected	106798	4.3659e+06	1.4339e+07	9.77113e+06	1.73124e+07	5.30151e+07	1.71355e+06	459504	711756	7.1807e+06	3.50436e+07	3.228e+06	1.38781e+09	9.09034e+08	5.33759e+08	1.89786e+09	4.61448e+09	3.67951e+08	1.19386e+08	1.14932e+08	1.46566e+10	1.54121e+07	2.09957e+07	6.23477e+06	3.57821e+08	2.41124e+08	6.69271e+06	3.954e+06	3.16559e+08	2.11833e+08	1.64818e+08	1.26222e+06	1.96591e+09	3.15579e+07	1.72934e+07	1.27993e+07	2.14116e+07	1.34414e+06	1.1975e+07	4.22626e+09	1.46268e+06	2.09611e+07	107095	1.01835e+07	1.048e+07	3.18115e+07	1.59735e+08
			549183	4.32244e+06	1.64683e+07	9.53197e+06	1.72119e+07	6.85359e+07	1.03013e+06	459606	741235	4.52234e+06	2.85237e+07	2.55984e+06	8.30258e+08	1.15653e+09	2.94024e+08	2.51904e+09	2.3804e+09	1.9953e+08	1.04043e+08	8.20685e+07	1.16478e+10	1.14266e+07	2.32596e+07	6.61622e+06	2.86675e+08	1.67695e+08	5.04511e+06	2.73309e+06	1.82785e+08	1.13293e+08	1.01711e+08	465268	2.16139e+09	3.48928e+07	2.30615e+07	1.71927e+07	2.55543e+07	1.88825e+06	1.20531e+07	4.99511e+09	1.74197e+06	2.31643e+07	158646	3.51051e+06	1.51553e+07	4.34697e+07	1.95503e+08
			908107	7.42488e+06	4.51962e+07	9.11934e+06	2.2032e+07	1.05004e+08	2.11225e+06	822417	1.38537e+06	9.66084e+06	6.1174e+07	6.719e+06	1.45053e+09	1.06896e+09	7.14311e+08	2.59255e+09	5.82991e+09	3.44524e+08	2.00018e+08	1.5284e+08	2.74616e+10	2.80721e+07	4.2253e+07	9.3335e+06	4.92532e+08	4.02819e+08	9.78788e+06	8.43879e+06	3.75822e+08	2.61385e+08	1.98192e+08	48045.7	2.29979e+09	5.64097e+07	3.68676e+06	4.35936e+06	6.15651e+06	2.96863e+06	1.5261e+07	5.45843e+09	2.1626e+06	2.85405e+07	93363.6	4.09047e+06	4.71811e+06	5.52693e+07	2.35615e+08
			435497	4.69477e+06	2.73084e+07	9.92646e+06	2.17901e+07	8.74776e+07	2.08766e+06	703022	1.1081e+06	9.56409e+06	4.67162e+07	3.03575e+06	2.1443e+09	1.1385e+09	7.05522e+08	2.36178e+09	6.1418e+09	3.66175e+08	1.92173e+08	1.21556e+08	3.38198e+10	2.91826e+07	3.4811e+07	1.17932e+07	5.26799e+08	4.30744e+08	1.39735e+07	5.92493e+06	4.17233e+08	4.66681e+08	1.84939e+08	5000	2.62636e+09	7.50059e+07	4.76235e+06	5.85289e+06	7.69739e+06	2.97284e+06	1.53309e+07	8.53091e+09	2.73191e+07	3.49339e+07	96796	6.10696e+06	7.37984e+06	6.76486e+07	2.7482e+08
			360875	1.06146e+07	1.46142e+07	7.93974e+06	1.43742e+07	5.13538e+07	1.29639e+06	340913	902100	5.71727e+06	3.59255e+07	2.72115e+06	1.40356e+09	9.19669e+08	4.0236e+08	1.8641e+09	3.46041e+09	2.22733e+08	1.1079e+08	7.51098e+07	2.31427e+10	1.43596e+07	1.22e+07	7.91807e+06	3.75351e+08	2.18197e+08	7.03709e+06	2.9331e+06	2.58206e+08	2.76706e+08	1.28692e+08	5000	2.84525e+09	7.86034e+07	8.1822e+06	9.51058e+06	8.02831e+06	960462	2.1606e+06	8.65236e+09	6.438e+07	4.65716e+07	5000	7.02496e+06	7.61726e+06	7.46136e+07	2.94232e+08
	RI	Ahcy RNAi Infected	381370	5.63295e+06	2.66609e+07	1.3958e+07	5.64723e+07	2.58826e+08	2.81836e+06	3.09436e+06	3.53304e+06	4.79038e+06	2.30813e+07	3.3167e+06	6.26618e+08	1.5988e+09	1.98251e+08	4.02154e+09	2.61143e+09	9.96395e+07	1.089e+08	7.46876e+07	9.18501e+09	9.53059e+06	4.60671e+07	6.20904e+06	1.87684e+08	1.23588e+08	6.02232e+06	1.5531e+06	1.63442e+08	1.6372e+08	1.52014e+08	294597	2.38466e+09	1.36513e+07	2.50782e+06	1.11275e+07	1.46671e+07	1.32401e+06	1.67393e+07	3.478e+09	1.02773e+07	2.25441e+07	148551	3.94301e+06	1.73447e+06	2.01397e+07	1.53852e+08
			81968.9	5.10908e+06	2.79324e+07	1.30234e+07	4.35187e+07	1.8479e+08	4.54827e+06	1.55204e+06	2.63674e+06	6.84546e+06	4.49888e+07	4.95739e+06	1.64493e+09	1.33415e+09	4.19175e+08	3.43534e+09	5.61452e+09	2.18096e+08	2.35745e+08	2.1039e+08	1.86538e+10	2.27303e+07	6.16397e+07	1.39358e+07	3.49241e+08	3.21803e+08	1.64496e+07	3.98454e+06	3.06499e+08	5.19624e+08	3.40827e+08	5000	3.00986e+09	2.16109e+07	2.80707e+06	1.29178e+07	2.33373e+07	1.56686e+06	3.12913e+06	5.24613e+09	1.43827e+07	2.29756e+07	15374	4.65777e+06	2.11435e+06	2.34441e+07	1.81157e+08
			187098	3.9828e+06	1.72259e+07	1.32394e+07	3.32092e+07	1.12015e+08	1.57464e+06	1.40738e+06	1.36513e+06	5.65514e+06	3.38105e+07	2.06575e+06	1.17865e+09	1.19495e+09	2.45239e+08	2.89086e+09	3.42727e+09	9.94719e+07	1.2009e+08	9.25597e+07	1.21605e+10	1.09463e+07	3.26395e+07	1.19592e+07	2.64302e+08	2.03596e+08	6.30854e+06	3.44283e+06	2.06138e+08	1.99741e+08	2.53472e+08	5000	3.56164e+09	2.87875e+07	3.65557e+06	2.06974e+07	4.62804e+06	2.56456e+06	4.42467e+06	5.55735e+09	1.6904e+06	2.52736e+07	220492	5.09776e+06	2.26715e+06	2.62438e+07	1.91866e+08
			153947	4.55926e+06	1.23053e+07	1.34574e+07	2.31591e+07	6.63666e+07	807261	785501	792675	4.29319e+06	2.43446e+07	1.57647e+06	7.29382e+08	1.03889e+09	1.59509e+08	2.35654e+09	2.77903e+09	9.24414e+07	1.15246e+08	9.17356e+07	9.71294e+09	9.78687e+06	2.87266e+07	9.98288e+06	2.28628e+08	1.56953e+08	5.34312e+06	2.00098e+06	1.84762e+08	1.87603e+08	2.77914e+08	5000	3.8908e+09	3.38705e+07	8.53946e+06	2.14421e+07	6.95449e+06	2.73561e+06	5.35786e+06	7.20445e+09	1.71927e+06	3.40041e+07	56761	6.44506e+06	4.37042e+06	4.38866e+07	2.5493e+08
			107129	5.77172e+06	2.25608e+07	1.63224e+07	3.61159e+07	1.32498e+08	4.90833e+06	1.51831e+06	1.69228e+06	8.73438e+06	4.15521e+07	3.13011e+06	1.72591e+09	1.12065e+09	4.51124e+08	3.01257e+09	6.30656e+09	2.2417e+08	1.81187e+08	1.26684e+08	2.29412e+10	2.0434e+07	4.89469e+07	1.5318e+07	3.76167e+08	3.57005e+08	1.38548e+07	3.20937e+06	3.48414e+08	4.96151e+08	4.01613e+08	5000	4.14452e+09	3.74972e+07	9.65878e+06	2.86879e+07	8.43534e+06	819481	8.32894e+06	7.64789e+09	3.96869e+06	4.20415e+07	75640.8	7.25497e+06	6.38006e+06	4.65007e+07	2.5952e+08
	Raw data name	Normalized data	Adenosine	Adenine	Inosine	Adenosine 5'-triphospate	Adenosine 5'-diphosphate	Adenosine 5'-monophosphate	Inosine monophosphate	Guanosine diphospate	Guanosine 5'-monophospahte	Guanosine	Xanthine	Hypoxanthine	Uric acid	L-Aspartic acid	Fumaric acid	D- and L-Glutamic acid	L-Proline	L-Methionine	S-Adenosylmethionine	S-Adenosylhomocysteine	Betaine	Glycine	Choline	Betaine aldehyde_1	Betaine aldehyde_2	Sarcosine	L-Cystathionine	gamma-Glutamylcysteine	L-Arginine	L-Ornithine	Taurine	Cysteic acid	0-Acetylserine	S-Sulfocysteine	L-Cystine	L-Glutathione oxidized	Cysteineglutathione disulfide	4-Glutamyl-aminobutanoic acid	Pyruvic acid	Methionine oxide	N-Formylmethionine	5-Methylthioadenosine	Dimethylsulfoniopropylaldehyde	S-Dimethylsulfoniumpropionic acid	Acrylic acid	Malonaldehyde	L-Serine
	CC	Control Uninfected	577565	1.98113e+06	1.69706e+07	2.79738e+06	8.15864e+06	3.60077e+07	659475	221735	492730	3.21464e+06	2.58643e+07	2.04891e+06	2.9256e+08	7.22795e+08	3.02448e+08	1.61852e+09	1.91608e+09	3.49879e+06	3.49894e+07	206985	1.50386e+10	9.52394e+06	1.68802e+07	3.9114e+06	2.44978e+08	1.11884e+08	1.32246e+06	3.99222e+06	1.42719e+08	1.15239e+08	6.50055e+07	1.46549e+06	1.22166e+09	2.70378e+07	8.57046e+06	1.68785e+07	2.40068e+06	951234	1.66336e+06	2.51177e+09	1.30603e+06	9.60731e+06	187559	998653	1.06541e+07	2.94649e+07	1.1208e+08
			581847	1.69535e+06	4.3689e+07	1.41239e+06	6.29296e+06	2.84244e+07	1.56478e+06	249895	527194	5.61815e+06	6.24717e+07	8.51476e+06	1.53364e+09	4.91346e+08	2.07903e+08	1.56163e+09	1.62576e+09	8.96239e+07	4.36794e+07	1.82442e+06	1.4009e+10	1.02264e+07	2.85884e+07	3.5218e+06	1.74849e+08	1.06457e+08	4.23783e+06	2.14618e+06	1.16424e+08	1.08053e+08	4.32132e+07	58436.7	6.82166e+08	1.06833e+07	8.00772e+06	945048	1.01483e+07	406838	9.9538e+06	1.06153e+09	663895	3.77881e+06	73239.7	5.52583e+06	5.33541e+06	1.3443e+07	4.55638e+07
			18116.6	1.56251e+06	7.03819e+06	4.74497e+06	6.38041e+06	2.71591e+07	868002	188807	329554	2.32004e+06	2.53038e+07	1.59702e+06	1.16201e+09	3.68196e+08	2.59907e+08	7.73023e+08	1.71803e+09	9.08551e+07	3.62968e+07	736879	1.5667e+10	1.14845e+07	1.11716e+07	3.41868e+06	2.1788e+08	1.42991e+08	3.90749e+06	1.65755e+06	1.22343e+08	1.03004e+08	6.22013e+07	1.55524e+06	1.35874e+09	1.98411e+07	1.88734e+06	1.86921e+07	1.94852e+07	741158	2.62837e+07	2.1793e+09	3.05889e+07	1.46552e+07	19061.4	1.45545e+06	1.10045e+07	2.60462e+07	9.61726e+07
			690618	3.32901e+06	4.76671e+07	1.0593e+06	5.68647e+06	4.33864e+07	779623	132443	769184	7.82147e+06	5.6585e+07	7.05204e+06	6.38856e+08	4.99607e+08	2.54044e+08	1.45478e+09	2.17423e+09	9.04571e+07	4.1259e+07	1.70741e+06	1.2917e+10	1.06145e+07	2.66704e+07	4.20429e+06	1.78207e+08	1.30543e+08	3.59797e+06	2.2841e+06	1.45634e+08	8.46478e+07	1.261e+08	1.92418e+06	1.46499e+09	1.41428e+07	1.68846e+06	1.88813e+06	2.12604e+06	1.42437e+06	2.21341e+06	1.88138e+09	2.63366e+06	1.05553e+07	25356.2	1.88345e+06	8.16061e+06	1.95205e+07	9.78046e+07
			396292	3.68215e+06	1.17681e+07	3.41586e+06	1.10573e+07	1.01272e+08	861750	393585	1.16755e+06	4.57123e+06	2.92788e+07	2.05556e+06	3.49213e+08	4.3395e+08	2.70748e+08	1.19724e+09	1.9349e+09	1.70811e+07	4.5506e+07	457150	1.60473e+10	9.90497e+06	1.51221e+07	4.70838e+06	2.03852e+08	1.31743e+08	2.75875e+06	3.22009e+06	1.45441e+08	7.62682e+07	1.52356e+08	3236.29	3.18007e+09	2.81196e+07	5.24778e+06	3.6119e+06	3.75629e+06	3.40225e+06	456810	3.73873e+09	3236.29	4.59813e+06	3236.29	4.65558e+06	5.33441e+06	4.12623e+07	1.70926e+08
	CI	Control Infected	39927.6	3.31846e+06	5.26887e+06	1.78707e+07	4.54828e+07	1.52742e+08	1.30597e+06	1.62238e+06	2.08311e+06	1.93605e+06	1.66348e+07	819845	4.08339e+08	1.12325e+09	1.96875e+08	2.7685e+09	1.92507e+09	3.59408e+07	5.23611e+07	173826	9.34585e+09	8.64257e+06	2.67742e+07	5.21014e+06	1.33322e+08	1.02117e+08	6.13588e+06	3.85203e+06	1.10208e+08	1.0826e+08	1.98659e+08	1.46229e+06	2.32074e+09	1.65252e+07	1.31296e+07	1.24331e+07	1.05378e+07	1.49586e+06	1.24162e+07	1.75662e+09	1.71105e+06	1.19426e+07	111157	4.42162e+06	3.58533e+06	2.36691e+07	1.46012e+08
			65988.2	3.21474e+06	1.1095e+07	1.62862e+07	4.32891e+07	1.32852e+08	1.8956e+06	1.77577e+06	1.99366e+06	3.78355e+06	2.41338e+07	1.67256e+06	7.50622e+08	1.1327e+09	3.16566e+08	3.10351e+09	3.32017e+09	7.4487e+07	6.83379e+07	332223	1.57588e+10	1.53301e+07	3.57012e+07	8.28892e+06	2.28781e+08	1.55395e+08	7.8438e+06	2.29133e+06	1.76212e+08	1.59346e+08	2.34425e+08	211051	2.67776e+09	3.28304e+07	3.21789e+06	1.41783e+07	1.84448e+07	1.47838e+06	1.32538e+06	2.23422e+09	2.95231e+06	1.19427e+07	111716	4.74654e+06	4.49137e+06	3.44945e+07	1.58627e+08
			72170.7	2.72253e+06	1.04354e+07	1.10919e+07	3.30423e+07	1.01604e+08	3.00772e+06	1.3958e+06	1.54739e+06	3.72318e+06	1.9329e+07	1.28653e+06	6.9804e+08	9.7541e+08	3.31887e+08	2.0992e+09	3.18114e+09	7.73983e+07	7.0523e+07	330896	1.5947e+10	1.6497e+07	3.57418e+07	7.90684e+06	2.41516e+08	1.73264e+08	9.16408e+06	2.56299e+06	1.78646e+08	1.68702e+08	2.47012e+08	355810	2.53941e+09	4.07869e+07	3.73769e+06	1.62933e+07	4.70632e+06	1.46607e+06	1.73788e+06	2.115e+09	4.10594e+06	1.17125e+07	183924	5.6499e+06	4.31251e+06	3.32459e+07	1.50231e+08
			22467.3	2.48645e+06	9.25645e+06	9.32771e+06	2.72306e+07	9.68606e+07	2.95424e+06	1.24719e+06	1.8002e+06	4.22412e+06	2.19617e+07	1.69384e+06	9.77857e+08	6.91511e+08	3.67713e+08	1.96898e+09	3.75572e+09	7.59328e+07	5.78398e+07	177014	1.62984e+10	1.52382e+07	2.77037e+07	6.25033e+06	2.18945e+08	1.15591e+08	6.89666e+06	1.35368e+06	1.75871e+08	1.56215e+08	1.784e+08	3664	2.43675e+09	3.79961e+07	5.53498e+06	1.27606e+07	5.73089e+06	1.61369e+06	3.82612e+06	1.8944e+09	3.43587e+06	1.00043e+07	71069	6.31945e+06	6.67202e+06	2.7277e+07	1.31871e+08
			74485.2	3.04179e+06	8.58433e+06	1.45619e+07	3.46147e+07	1.03951e+08	2.14559e+06	1.86791e+06	1.97268e+06	2.677e+06	2.29301e+07	1.40049e+06	4.60663e+08	8.21734e+08	2.86631e+08	2.40972e+09	2.51183e+09	9.11606e+06	5.32903e+07	93744.7	1.2295e+10	1.04802e+07	3.04962e+07	5.89062e+06	1.4664e+08	1.00023e+08	3.84003e+06	4.45801e+06	1.29337e+08	9.61405e+07	1.87882e+08	3633.69	2.45839e+09	4.23044e+07	6.95427e+06	1.34329e+07	5.72899e+06	576387	6.43449e+06	1.97031e+09	5.85511e+06	1.04512e+07	3633.69	7.19989e+06	7.07006e+06	3.48216e+07	1.60151e+08
	RC	Ahcy RNAi Uninfected	68284.3	2.79147e+06	9.16808e+06	6.24747e+06	1.10692e+07	3.38969e+07	1.09561e+06	293798	455083	4.5912e+06	2.24062e+07	2.06392e+06	8.87341e+08	5.81219e+08	3.41275e+08	1.21345e+09	2.95041e+09	2.35261e+08	7.63328e+07	7.34854e+07	9.37112e+09	9.85422e+06	1.34242e+07	3.98639e+06	2.28783e+08	1.5417e+08	4.27919e+06	2.52811e+06	2.02402e+08	1.35442e+08	1.05382e+08	807038	1.25697e+09	2.01775e+07	1.10571e+07	8.18359e+06	1.36902e+07	859418	7.65658e+06	2.70219e+09	935212	1.34021e+07	68474.3	6.51113e+06	6.70073e+06	2.03397e+07	1.02131e+08
			365050	2.87319e+06	1.09467e+07	6.33605e+06	1.1441e+07	4.55569e+07	684741	305507	492710	3.00607e+06	1.89602e+07	1.70157e+06	5.51885e+08	7.6876e+08	1.95442e+08	1.67444e+09	1.58228e+09	1.32631e+08	6.91587e+07	5.45522e+07	7.74245e+09	7.59544e+06	1.5461e+07	4.3979e+06	1.90557e+08	1.11469e+08	3.35356e+06	1.81673e+06	1.215e+08	7.53078e+07	6.76086e+07	309271	1.43671e+09	2.31938e+07	1.53294e+07	1.14283e+07	1.69864e+07	1.25515e+06	8.01191e+06	3.32032e+09	1.15792e+06	1.53976e+07	105455	2.33349e+06	1.0074e+07	2.8895e+07	1.29954e+08
			411425	3.36391e+06	2.04765e+07	4.13159e+06	9.9818e+06	4.75731e+07	956973	372603	627652	4.37692e+06	2.77154e+07	3.0441e+06	6.57176e+08	4.84301e+08	3.23625e+08	1.17458e+09	2.64129e+09	1.56089e+08	9.06197e+07	6.92453e+07	1.24417e+10	1.27183e+07	1.91431e+07	4.22862e+06	2.23146e+08	1.82501e+08	4.43448e+06	3.82326e+06	1.70269e+08	1.18423e+08	8.97926e+07	21767.5	1.04194e+09	2.55569e+07	1.67032e+06	1.97504e+06	2.78926e+06	1.34496e+06	6.9141e+06	2.47299e+09	979782	1.29305e+07	42299.2	1.85322e+06	2.13758e+06	2.50402e+07	1.06748e+08
			201774	2.17517e+06	1.26525e+07	4.59912e+06	1.00958e+07	4.053e+07	967255	325724	513406	4.43123e+06	2.16445e+07	1.40652e+06	9.93495e+08	5.27487e+08	3.26882e+08	1.09426e+09	2.84561e+09	1.69656e+08	8.90374e+07	5.63192e+07	1.56694e+10	1.35209e+07	1.61286e+07	5.46402e+06	2.44076e+08	1.99572e+08	6.4742e+06	2.74513e+06	1.93312e+08	2.16222e+08	8.5686e+07	2316.6	1.21684e+09	3.47517e+07	2.20649e+06	2.71176e+06	3.56635e+06	1.37738e+06	7.10312e+06	3.95253e+09	1.26575e+07	1.61856e+07	44847.5	2.82947e+06	3.41922e+06	3.13429e+07	1.27329e+08
			223431	6.57189e+06	9.0482e+06	4.91579e+06	8.89961e+06	3.17951e+07	802644	211072	558524	3.53978e+06	2.22428e+07	1.68477e+06	8.68999e+08	5.69402e+08	2.49116e+08	1.15414e+09	2.14247e+09	1.37902e+08	6.85944e+07	4.65033e+07	1.43285e+10	8.89059e+06	7.55349e+06	4.90237e+06	2.32394e+08	1.35094e+08	4.35693e+06	1.81599e+06	1.59865e+08	1.71319e+08	7.96779e+07	3095.69	1.7616e+09	4.86663e+07	5.06591e+06	5.88835e+06	4.97062e+06	594658	1.33771e+06	5.357e+09	3.98601e+07	2.88342e+07	3095.69	4.34942e+06	4.71613e+06	4.61961e+07	1.8217e+08
	RI	Ahcy RNAi Infected	287675	4.24905e+06	2.01108e+07	1.05288e+07	4.25982e+07	1.95237e+08	2.12594e+06	2.33413e+06	2.66504e+06	3.61347e+06	1.74107e+07	2.50185e+06	4.7267e+08	1.20601e+09	1.49544e+08	3.03352e+09	1.96985e+09	7.516e+07	8.21452e+07	5.63383e+07	6.92843e+09	7.1891e+06	3.47493e+07	4.6836e+06	1.41574e+08	9.32247e+07	4.54275e+06	1.17154e+06	1.23287e+08	1.23497e+08	1.14667e+08	222220	1.7988e+09	1.02974e+07	1.8917e+06	8.39366e+06	1.10637e+07	998729	1.26268e+07	2.62352e+09	7.75237e+06	1.70054e+07	112055	2.97429e+06	1.30835e+06	1.51918e+07	1.16053e+08
			52330.6	3.26174e+06	1.78326e+07	8.3144e+06	2.77832e+07	1.17974e+08	2.9037e+06	990853	1.68335e+06	4.37028e+06	2.87218e+07	3.1649e+06	1.05015e+09	8.51746e+08	2.6761e+08	2.19319e+09	3.58442e+09	1.39237e+08	1.50504e+08	1.34317e+08	1.19089e+10	1.45115e+07	3.9352e+07	8.89692e+06	2.22963e+08	2.05445e+08	1.05017e+07	2.54381e+06	1.95675e+08	3.31738e+08	2.17591e+08	3192.1	1.92156e+09	1.37968e+07	1.79209e+06	8.24699e+06	1.4899e+07	1.00031e+06	1.9977e+06	3.34923e+09	9.18219e+06	1.46681e+07	9815.07	2.97362e+06	1.34984e+06	1.49672e+07	1.15654e+08
			151431	3.22355e+06	1.39421e+07	1.07156e+07	2.68785e+07	9.0661e+07	1.27447e+06	1.13909e+06	1.1049e+06	4.57709e+06	2.73651e+07	1.67196e+06	9.53959e+08	9.67158e+08	1.98489e+08	2.33977e+09	2.77392e+09	8.05094e+07	9.71969e+07	7.49149e+07	9.84233e+09	8.85959e+06	2.64174e+07	9.67942e+06	2.13917e+08	1.64784e+08	5.10593e+06	2.78652e+06	1.66842e+08	1.61664e+08	2.05152e+08	4046.84	2.88268e+09	2.32997e+07	2.9587e+06	1.67518e+07	3.74579e+06	2.07567e+06	3.58119e+06	4.49794e+09	1.36815e+06	2.04556e+07	178459	4.12596e+06	1.83496e+06	2.12409e+07	1.5529e+08
			124614	3.69052e+06	9.9606e+06	1.08932e+07	1.87463e+07	5.37209e+07	653443	635829	641636	3.47515e+06	1.97059e+07	1.27609e+06	5.90403e+08	8.40935e+08	1.29116e+08	1.90752e+09	2.2495e+09	7.48273e+07	9.32869e+07	7.4256e+07	7.8622e+09	7.92205e+06	2.32529e+07	8.08071e+06	1.85065e+08	1.27047e+08	4.32502e+06	1.61971e+06	1.49557e+08	1.51857e+08	2.24959e+08	4047.28	3.14943e+09	2.74167e+07	6.91232e+06	1.73565e+07	5.62936e+06	2.21436e+06	4.33696e+06	5.83169e+09	1.39167e+06	2.75249e+07	45945.6	5.21699e+06	3.53766e+06	3.55243e+07	2.06355e+08
			58444.3	3.14877e+06	1.23081e+07	8.90472e+06	1.97031e+07	7.22847e+07	2.67775e+06	828319	923225	4.76506e+06	2.26688e+07	1.70764e+06	9.41572e+08	6.11376e+08	2.46112e+08	1.64351e+09	3.44056e+09	1.22296e+08	9.88469e+07	6.91127e+07	1.25156e+10	1.11478e+07	2.67031e+07	8.35675e+06	2.05219e+08	1.94765e+08	7.55851e+06	1.75088e+06	1.90078e+08	2.70676e+08	2.19101e+08	2727.76	2.26105e+09	2.04567e+07	5.26937e+06	1.56508e+07	4.60192e+06	447069	4.54387e+06	4.17232e+09	2.16513e+06	2.29358e+07	41266	3.95796e+06	3.48066e+06	2.53686e+07	1.41582e+08
[truncated: 26 more columns]

## Sheet: S2
	Experiment:	Combination of quantitative analysis (ng/sample) and peak area of metabolites of interest for Ahcy RNAi hemocytes incubated with 13C5 methionine
	Internal Code:	210618
	Tested groups:	Control Uninfected	BDSC 36304 x SrpGal4Gal80
		Control Infected
		Ahcy RNAi Uninfected	BDSC 67848 x SrpGal4Gal80
		Ahcy RNAi Infected
			Quantitative analysis (ng/sample)									Peak area
	Raw data name		Methionine	Methionine_13C5	Methionine_13C4	S-Adenosylmethionine	S-Adenosylmethionine_13C5	S-Adenosylhomocysteine	S-Adenosylhomocysteine_13C4	Cystathionine	Cystathionine_13C4	5-Methylthioadenosine	5-Methylthioadenosine-13C1
	9C	Control Uninfected	629.567	1125.8	18.6796	70.94	8.00304	0.125569	0.0209334	150.7	90.1619	6.56343e+07	1.27849e+07
			781.948	2460.3	31.8363	80.2575	6.35144	0.0598614	0.0132885	231.11	115.517	8.99325e+07	1.5031e+07
			524.113	2663.95	35.136	72.8646	5.26487	0.0823098	0.0151509	119.175	74.9527	8.74642e+07	1.43854e+07
			817.157	1481.18	19.8289	82.9552	3.63726	0.0745422	0.0135304	241.932	131.987	8.62384e+07	1.20415e+07
			728.94	955.468	14.5566	99.4515	4.5704	0.0777946	0.0114601	199.258	128.081
	9I	Control Infected	267.538	1099.28	17.9693	58.0141	9.5607	0.118956	0.0381049	139.096	71.9431	6.31748e+07	1.64469e+07
			223.546	2853.49	9.7641	27.8048	3.32659	0.129837	0.0234196	79.1677	31.2405	1.21212e+08	2.32749e+07
			321.518	1668.93	25.1411	44.1289	13.798	0.134856	0.0571711	132.674	70.9727	4.97692e+07	1.72095e+07
			716.5	3977.94	35.1668	31.8455	6.79772	0.0635496	0.0270866	513.284	175.286	1.05229e+08	2.76628e+07
			356.345	2230.44	31.3706	46.4822	11.2321	0.0570361	0.0310296	272.516	113.557	7.2802e+07	2.1481e+07
			303.996	688.471	12.8044	54.5923	9.28314	0.186135	0.0437038	255.511	44.7325	6.48878e+07	1.49102e+07
	8C	Ahcy RNAi Uninfected	612.741	705.238	17.0195	97.0133	2.2788	4.08691	0.038713	172.775	83.1079	9.04429e+07	1.07311e+07
			1228.95	1024.34	22.3174	151.941	4.00566	4.4141	0.0329053	358.166	135.593	2.69411e+08	3.43238e+07
			847.184	627.12	21.6487	160.18	4.02093	6.67731	0.0465066	147.067	84.7063	1.70051e+08	1.89796e+07
			1701.88	2307.65	27.8264	164.586	3.09077	6.01586	0.036495	488.863	195.141	1.88313e+08	2.33409e+07
			1131.34	894.808	16.504	156.436	2.81564	5.28213	0.0359024	260.618	113.18	1.37299e+08	1.71942e+07
	8I	Ahcy RNAi Infected	660.647	1919.1	30.7549	112.054	13.029	3.59464	0.198394	389.202	122.304	1.29734e+08	2.48781e+07
			61.7215	2175.86	30.0402	123.383	11.6804	3.87834	0.128477	362.166	89.5564	1.46421e+08	2.68336e+07
			769.828	3068.19	34.7503	136.83	9.24586	7.73181	0.135007	481.612	161.29	2.07291e+08	3.3762e+07
			838.1	2076.78	29.6127	129.914	8.11341	8.43427	0.102327	398.882	154.572	2.12682e+08	3.18978e+07
			958.339	3714.58	40.0118	174.683	10.8959	10.1484	0.141432	716.345	249.692	3.60826e+08	5.48614e+07
		Ex vivo medium	0	1449.78	41.7038
			0	937.354	29.2853
			0	911.034	27.6733

## Sheet: S3
	Experiment:	Peak area Adk3 RNAi and Ak1 RNAi
	Internal Code:	221109
	Tested groups:	Control Uninfected	BDSC 36304 x SrpGal4Gal80
		Control Infected
		Adk3 RNAi Uninfected	BDSC 67755 x SrpGal4Gal80
		Adk3 RNAi Infected
		Control Uninfected	BDSC 36303 x SrpGal4Gal80
		Control Infected
		Ak1 RNAi Uninfected	BDSC 35582 x SrpGal4Gal80
		Ak1 RNAi Infected
	Raw data name	Raw data	Adenosine	Inosine	Adenosine 5'-triphospate	Adenosine 5'-diphosphate	Adenosine 5'-monophosphate	Inosine monophosphate	Guanosine diphospate	Guanosine 5'-monophospahte	Guanosine	Guanine	Xanthine	Hypoxanthine	Uric acid	L-Aspartic acid	Fumaric acid	D- and L-Glutamic acid	L-Proline	L-Methionine	S-Adenosylmethionine	S-Adenosylhomocysteine	Glycine betaine	Glycine	Choline	Betaine aldehyde	Sarcosine	L-Cystathionine	L-Cysteine	gamma-Glutamylcysteine	L-Arginine	Taurine	Cysteic acid	5-Glutamylcystine	0-Acetylserine	S-Sulfocysteine	L-Cystine	L-Glutathione oxidized	Cysteineglutathione disulfide	Sulfolactic acid	D- and L-2-Aminobutyric acid	4-Glutamyl-aminobutanoic acid	Cysteinesulfinic acid	Pyruvic acid	Mercapturic acid	Methionine oxide	N-Formylmethionine	L-Serine	O-Phospho-L-serine
	D1 - D5	Control Uninfected	767276	5.52905e+07	7.81802e+06	1.54382e+07	3.74608e+07	1.57194e+06	1.12033e+06	2.08679e+06	1.4116e+07	144289	5.19024e+07	4.33188e+06	7.97108e+08	3.76706e+08	6.45065e+08	1.70624e+09	2.67668e+09	4.91915e+09	3.04789e+08	7.47782e+06	4.67894e+10	1.17623e+08	7.88029e+09	3.43361e+08	7.74043e+08	4.83019e+07	1.1753e+06	3.34298e+06	3.40273e+08	1.2285e+07	883101	8.24613e+06	1.759e+08	66118.1	9.12108e+06	2.84273e+07	4.7589e+07	3.05143e+07	4.93398e+08	1.68415e+06	3.47783e+06	2.73369e+07	2.62141e+06	1.20007e+10	3.22335e+06	2.51512e+08	2.21041e+06
			66679	7.0118e+06	799821	4.33897e+06	1.46346e+07	1.43488e+06	265897	675441	2.96559e+06	133326	2.17515e+07	985845	2.71801e+08	1.77058e+08	3.33301e+08	5.73051e+08	7.05769e+08	1.64811e+09	1.73183e+08	1.00725e+06	1.9695e+10	3.71537e+07	1.87096e+09	2.14994e+08	3.00346e+08	2.04716e+07	287053	368826	9.02564e+07	3.53195e+06	20375.2	2.34379e+06	3.50639e+07	565697	1.97211e+06	3.26013e+06	1.30539e+07	1.04813e+07	1.98074e+08	320716	913111	1.12417e+07	821767	4.57129e+09	730222	1.44879e+08	428339
			51764.3	1.98289e+07	4.19131e+06	7.53587e+06	1.24063e+07	476221	562927	895888	8.14585e+06	145536	4.17704e+07	1.8598e+06	5.00861e+08	1.38335e+08	5.63107e+08	7.24385e+08	1.6335e+09	1.60862e+09	1.59916e+08	1.85416e+06	1.84316e+10	5.99931e+07	1.44398e+09	1.97323e+08	3.41553e+08	1.8509e+07	1.02472e+06	782182	2.03789e+08	5.20255e+06	52717.7	1.92903e+06	7.64259e+07	224739	7.52634e+06	2.83103e+06	1.16201e+07	1.39032e+07	1.76227e+08	763986	1.60017e+06	1.84335e+07	1.99237e+06	3.25778e+09	1.80223e+06	1.33642e+08	300736
			124250	4.09154e+07	3.16005e+06	7.24745e+06	1.49947e+07	863456	482311	1.13369e+06	9.12556e+06	108785	1.02593e+08	6.84686e+06	9.69814e+08	1.33597e+08	5.05061e+08	8.87092e+08	1.29335e+09	2.87684e+09	2.32279e+08	2.35643e+06	3.13166e+10	4.79928e+07	7.07437e+09	2.76881e+08	6.04467e+08	3.13677e+07	1.15991e+06	2.35092e+06	1.85865e+08	7.79747e+06	49940.1	1.20715e+07	7.30877e+07	685361	8.558e+06	1.67639e+07	4.6226e+07	1.28997e+07	2.95567e+08	661131	1.45533e+06	2.49304e+07	3.1708e+06	6.35952e+09	1.95519e+06	1.07743e+08	577120
			489957	2.27415e+07	1.12355e+06	4.08195e+06	1.24696e+07	625569	225168	1.00621e+06	4.38085e+06	297803	3.55528e+07	3.49254e+06	3.27637e+08	2.96626e+08	3.40695e+08	9.63543e+08	7.81427e+08	1.64621e+09	2.04139e+08	2.48679e+06	2.49694e+10	3.5182e+07	3.98296e+09	2.26013e+08	3.72925e+08	1.99488e+07	441041	851209	1.18059e+08	5.20643e+06	449760	4.70078e+06	7.04969e+07	404484	3.23641e+06	1.18484e+07	3.15469e+07	1.03454e+07	2.06184e+08	463197	3.46485e+06	1.05654e+07	843952	4.93815e+09	1.1574e+06	1.20282e+08	620616
	D6 - D10	Control Infected	27601.7	3.51948e+06	2.80096e+06	7.93185e+06	2.74594e+07	1.13178e+06	500733	1.41777e+06	879145	151266	1.12408e+07	835477	1.14682e+08	3.42441e+08	1.89651e+08	9.21216e+08	3.91906e+08	5.22807e+08	1.91352e+08	3.36092e+06	1.32676e+10	1.8157e+07	6.07235e+09	1.09569e+08	2.3962e+08	3.40688e+07	29620.9	780375	4.1426e+07	1.14603e+07	24742.6	1.42551e+07	1.44884e+07	246931	269538	3.37637e+07	2.27566e+07	2.11327e+06	1.668e+08	228616	609087	3.59992e+06	859461	1.85422e+09	547351	8.0214e+07	428113
			55468.5	1.33227e+07	9.53313e+06	2.61218e+07	1.06582e+08	2.47496e+06	2.09463e+06	4.17236e+06	4.1127e+06	184024	2.17426e+07	1.65394e+06	4.54437e+08	2.30732e+08	4.85903e+08	1.6431e+09	2.13369e+09	2.1362e+09	2.88605e+08	4.05146e+06	3.23392e+10	8.11431e+07	7.96838e+09	2.56747e+08	7.54104e+08	5.26607e+07	977221	2.72165e+06	2.07746e+08	3.02326e+07	378419	1.63556e+07	8.24297e+07	222210	7.17694e+06	3.63613e+07	4.59138e+07	1.61225e+07	3.63841e+08	1.27542e+06	2.29732e+06	2.0082e+07	3.07637e+06	6.24255e+09	1.94141e+06	1.3556e+08	1.00152e+06
			39308.6	5.37405e+07	2.04453e+07	3.68962e+07	1.36396e+08	5.91215e+06	3.15736e+06	6.01648e+06	1.61224e+07	603787	7.69793e+07	9.75539e+06	1.07274e+09	2.7844e+08	5.96992e+08	2.27943e+09	3.81563e+09	4.00976e+08	4.01502e+07	1.38237e+06	1.01229e+10	1.37418e+08	2.28406e+09	1.04212e+08	1.91899e+08	1.30083e+07	1.75356e+06	2.77758e+06	4.08933e+08	1.07188e+07	6.18999e+06	581944	1.84779e+08	286894	1.29733e+07	6.66647e+06	1.65861e+07	2.88378e+07	1.05038e+08	2.01346e+06	9.94102e+06	1.99755e+07	1.34151e+06	1.61855e+09	4.12852e+06	1.97335e+08	229112
			61963.8	1.26431e+07	3.82457e+06	1.02403e+07	4.05792e+07	1.63806e+06	1.06005e+06	2.39157e+06	3.32932e+06	92249.7	1.51415e+07	805520	3.16929e+08	1.78223e+08	2.78851e+08	1.12932e+09	7.72582e+08	2.63958e+09	2.7542e+08	4.09764e+06	3.99905e+10	3.51833e+07	9.02612e+09	2.60554e+08	8.55552e+08	5.70796e+07	364173	1.11533e+06	9.15825e+07	2.15379e+07	120591	9.89874e+06	3.65035e+07	341172	2.72484e+06	5.3862e+07	4.56472e+07	1.26942e+07	2.72386e+08	408649	1.70734e+06	1.08243e+07	2.16524e+06	6.54247e+09	952498	9.94537e+07	2.12675e+06
			113630	1.82573e+07	6.58778e+06	1.16644e+07	2.83586e+07	631375	1.11653e+06	1.41661e+06	5.21685e+06	106032	2.006e+07	960845	3.49498e+08	2.30379e+08	2.5579e+08	1.2908e+09	1.16591e+09	2.13127e+09	2.09205e+08	3.73335e+06	3.96416e+10	5.13368e+07	1.11066e+10	2.63871e+08	8.45823e+08	5.26916e+07	356231	984980	1.03854e+08	2.03414e+07	481685	3.34458e+06	5.06686e+07	161264	2.63518e+06	2.34193e+07	5.06992e+07	1.7907e+07	2.61576e+08	561609	1.54976e+06	8.1167e+06	878300	6.10609e+09	730043	1.32615e+08	2.16645e+06
	D11 - D15	Adk3 RNAi Uninfected	68214.9	1.97455e+07	5.57324e+06	7.59475e+06	1.03164e+07	371048	482859	828613	7.83364e+06	106480	3.64621e+07	2.50452e+06	4.8087e+08	2.4509e+08	5.94617e+08	7.24138e+08	1.54676e+09	6.58735e+08	6.89948e+07	1.03675e+06	1.27822e+10	8.43749e+07	7.199e+08	1.35366e+08	1.0532e+08	7.7463e+06	344440	914476	2.31486e+08	1.61323e+06	99820.1	792843	1.17753e+08	115428	2.82939e+06	857566	3.44156e+06	2.62089e+07	9.39045e+07	968269	520699	2.4963e+07	961975	2.49819e+09	1.77626e+06	1.87799e+08	10603.9
			47005.7	1.06074e+07	2.61198e+06	5.22444e+06	9.47569e+06	237720	276950	627577	4.94756e+06	131569	2.8345e+07	1.74805e+06	2.71585e+08	2.52326e+08	3.74413e+08	7.17806e+08	7.12319e+08	2.01266e+08	2.19293e+07	291523	4.48369e+09	4.32801e+07	2.85654e+08	5.63747e+07	3.41522e+07	1.79456e+06	89658.4	514706	1.20503e+08	439634	4500	217191	5.09245e+07	425959	748529	219968	695910	1.29398e+07	5.54191e+07	466995	529461	1.11563e+07	601262	7.15372e+08	743903	1.41876e+08	4500
			33838.9	1.93433e+07	5.51271e+06	7.70115e+06	1.1498e+07	42807.6	555169	633177	7.65992e+06	116474	3.97596e+07	3.00152e+06	2.85852e+08	2.40534e+08	6.75854e+08	8.59803e+08	2.02728e+09	4.34519e+09	3.30625e+08	4.11695e+06	4.74515e+10	9.63396e+07	5.33103e+09	3.40056e+08	7.35269e+08	2.63948e+07	679954	821155	2.60858e+08	1.06774e+07	205647	1.21012e+06	1.67836e+08	106065	5.23949e+06	4.23089e+06	1.7725e+07	2.87646e+07	2.866e+08	1.09972e+06	1.05718e+06	2.90049e+07	841200	1.307e+10	2.82126e+06	1.95045e+08	910787
			37451.4	7.65571e+06	1.03813e+06	2.8014e+06	7.02329e+06	177906	105602	576795	3.79423e+06	124035	2.60641e+07	1.38677e+06	1.85161e+08	3.17955e+08	3.58687e+08	6.78258e+08	7.77021e+08	1.50277e+09	2.11418e+08	1.53614e+06	2.25102e+10	3.39351e+07	3.09667e+09	2.40557e+08	3.30678e+08	1.93587e+07	72707.8	344959	1.01466e+08	5.0091e+06	4500	2.67514e+06	4.67817e+07	345356	647425	5.77741e+06	9.25452e+06	1.0915e+07	2.02889e+08	363438	449625	9.04181e+06	380930	6.4405e+09	783914	1.32991e+08	660572
			1.11959e+06	1.3792e+08	8.15405e+06	1.74548e+07	5.26608e+07	1.91902e+06	1.29515e+06	3.25581e+06	2.34336e+07	187986	1.46579e+08	2.33646e+07	1.26323e+09	5.56477e+08	6.92883e+08	2.74753e+09	3.02457e+09	1.88148e+09	1.96006e+08	2.37645e+06	2.81497e+10	1.37701e+08	7.84289e+09	2.31098e+08	2.97633e+08	2.00762e+07	1.83513e+06	5.17507e+06	3.85604e+08	7.38602e+06	754225	6.87267e+06	2.35451e+08	148153	1.31129e+07	3.16637e+07	5.21789e+07	2.84989e+07	2.53339e+08	3.16088e+06	2.19498e+06	4.21358e+07	5.57956e+06	7.24706e+09	5.03042e+06	1.67717e+08	733918
	D16 - D20	Adk3 RNAi Infected	31864.5	1.65407e+07	5.89595e+06	1.30044e+07	2.67876e+07	760627	860727	1.53298e+06	6.25678e+06	142882	2.41894e+07	1.759e+06	3.00371e+08	2.66046e+08	3.28618e+08	1.30181e+09	1.61942e+09	1.63485e+09	2.4475e+08	2.79526e+06	2.59273e+10	6.47595e+07	6.83115e+09	2.37962e+08	4.29976e+08	3.52881e+07	567013	3.8382e+06	1.91853e+08	2.64953e+07	226451	2.13064e+07	7.24546e+07	162446	4.17894e+06	3.039e+07	3.5037e+07	1.52196e+07	3.49258e+08	682456	1.24714e+06	1.74394e+07	2.22151e+06	9.17882e+09	1.33401e+06	1.87515e+08	801099
			46964.4	1.49925e+07	8.17937e+06	1.58495e+07	3.11752e+07	654956	1.09541e+06	1.28948e+06	5.4081e+06	123058	2.56357e+07	2.39263e+06	2.98203e+08	3.29133e+08	2.29941e+08	1.25635e+09	1.21506e+09	4.14326e+08	9.47193e+07	1.05585e+06	8.669e+09	5.80588e+07	1.84414e+09	1.14447e+08	1.66758e+08	1.33217e+07	145132	1.64249e+06	1.39847e+08	1.05266e+07	153806	3.81338e+06	4.90994e+07	71943.5	1.10955e+06	5.81586e+06	5.75128e+06	1.15994e+07	1.29305e+08	504111	745942	9.8268e+06	1.04592e+06	3.03622e+09	1.03298e+06	1.78597e+08	175117
			81713.3	1.95551e+07	9.66972e+06	1.91758e+07	5.07677e+07	1.2281e+06	1.54108e+06	1.7698e+06	7.98128e+06	212744	2.96428e+07	2.18337e+06	2.90373e+08	2.89413e+08	3.90392e+08	1.30141e+09	1.91359e+09	1.44197e+09	2.16372e+08	2.72891e+06	2.24293e+10	9.20419e+07	4.44992e+09	2.39843e+08	5.21029e+08	2.90772e+07	1.02614e+06	1.42908e+06	2.22233e+08	2.81855e+07	4.83342e+06	4.55591e+06	8.43309e+07	136482	7.35701e+06	1.55829e+07	3.23269e+07	1.54393e+07	3.21732e+08	814743	5.25589e+06	6.10839e+06	674123	8.54171e+09	1.37547e+06	2.04422e+08	638204
			181738	1.39565e+07	1.98395e+06	6.70292e+06	1.64787e+07	713166	401954	960391	3.94082e+06	176385	2.45124e+07	2.02361e+06	2.29405e+08	2.89965e+08	1.77763e+08	9.33618e+08	7.62667e+08	6.59226e+08	1.32235e+08	1.25297e+06	1.46639e+10	3.47574e+07	4.01095e+09	1.71006e+08	3.39505e+08	2.27533e+07	254211	1.85813e+06	8.61288e+07	2.39388e+07	105985	1.26019e+07	2.44831e+07	233987	1.58395e+06	8.61826e+06	1.33884e+07	1.00528e+07	2.03706e+08	303333	655263	5.83882e+06	771030	6.56756e+09	403951	1.37353e+08	504466
			24342.7	1.01913e+07	4.80832e+06	8.51478e+06	1.44774e+07	17584.9	460388	780810	4.25532e+06	202829	2.58609e+07	1.32842e+06	3.1929e+08	2.81589e+08	2.76253e+08	1.01351e+09	1.17723e+09	1.90503e+08	3.76379e+07	335145	5.12179e+09	4.83117e+07	7.46936e+08	7.0629e+07	9.89678e+07	8.37446e+06	387580	1.23003e+06	1.26997e+08	8.81018e+06	244211	1.02518e+06	4.63055e+07	327335	2.4509e+06	1.7616e+06	5.04652e+06	1.56733e+07	7.81341e+07	504904	760705	7.52699e+06	771587	2.13151e+09	613729	1.84174e+08	103403
	F1 - F5	Control 2 Uninfected	864345	7.6897e+07	4.18196e+06	1.24599e+07	5.60727e+07	3.90459e+06	1.68156e+06	3.4089e+06	1.5902e+07	201039	5.74745e+07	5.67354e+06	8.9102e+08	2.75681e+08	6.03914e+08	1.88666e+09	1.63713e+09	3.4554e+09	2.3281e+08	7.529e+06	5.06441e+10	1.11201e+08	1.16084e+10	3.35914e+08	5.80314e+08	5.60216e+07	1.02115e+06	2.2412e+06	3.32606e+08	1.36345e+07	1.24253e+06	341315	2.25755e+08	61056.7	7.82354e+06	4.71757e+07	6.83353e+07	4.06827e+07	3.65022e+08	2.35658e+06	3.51931e+06	2.72065e+07	1.67381e+06	1.19045e+10	4.51345e+06	1.56516e+08	1.90315e+06
			1.01034e+06	5.34912e+07	235848	3.01572e+06	2.40595e+07	745790	265493	1.73383e+06	9.10516e+06	242434	3.93912e+07	5.27858e+06	4.28671e+08	3.05676e+08	2.0738e+08	1.07994e+09	5.5385e+08	6.31633e+07	2.27951e+07	492439	5.21602e+09	2.6881e+07	8.12909e+08	5.47903e+07	2.67103e+07	2.36729e+06	486846	335224	1.05875e+08	1.69456e+06	4.69049e+06	216841	6.40115e+07	106475	3.70192e+06	1.64529e+06	3.04893e+06	1.1581e+07	3.75174e+07	494242	3.08381e+06	1.82126e+06	189469	7.89475e+08	370722	1.04401e+08	50694
			960217	5.94887e+07	2.2465e+06	7.78091e+06	3.3465e+07	1.73991e+06	840028	2.43293e+06	9.58524e+06	292784	3.40893e+07	4.43697e+06	4.60119e+08	3.29732e+08	2.93266e+08	1.30634e+09	8.31318e+08	1.48254e+09	1.77774e+08	2.04454e+06	4.14572e+10	4.12119e+07	7.17077e+09	2.40859e+08	2.91922e+08	2.30824e+07	669463	881613	1.49024e+08	1.0287e+07	2.11967e+06	4.85213e+06	9.68038e+07	187796	4.84118e+06	1.36058e+07	2.82716e+07	1.50727e+07	2.86382e+08	816943	4.76631e+06	9.18546e+06	581135	7.45027e+09	1.08837e+06	1.3015e+08	1.44973e+06
			428817	2.16564e+07	1.5649e+06	4.02402e+06	1.06525e+07	656489	360547	931475	3.87708e+06	107616	3.88277e+07	2.6348e+06	3.62641e+08	2.79629e+08	3.45454e+08	9.09632e+08	6.07492e+08	1.82248e+09	1.9357e+08	3.90197e+06	3.88866e+10	2.9289e+07	5.5832e+09	2.70637e+08	4.68545e+08	3.31313e+07	315407	641167	1.05924e+08	9.02353e+06	315091	5.17436e+06	6.83988e+07	123637	2.47607e+06	2.07831e+07	3.18713e+07	1.47126e+07	3.18468e+08	622125	1.2814e+06	6.77063e+06	515004	7.43927e+09	1.06504e+06	1.10502e+08	1.43134e+06
			1.31212e+06	9.632e+07	529048	4.33476e+06	2.60169e+07	853956	341086	1.76698e+06	9.83336e+06	111201	5.64495e+07	4.95148e+06	5.23661e+08	4.45894e+08	3.62157e+08	1.56351e+09	6.99634e+08	6.86259e+08	1.69934e+08	1.85298e+06	3.72691e+10	4.71605e+07	6.88513e+09	2.5879e+08	3.92438e+08	2.56433e+07	1.12727e+06	678354	1.49419e+08	8.70179e+06	1.04379e+07	3.55388e+06	1.38718e+08	85818.8	8.22655e+06	2.76031e+07	2.55435e+07	2.09916e+07	3.28225e+08	1.03823e+06	6.80232e+06	4.02666e+06	416911	7.45679e+09	1.17037e+06	1.22218e+08	1.90833e+06
	F6 - F10	Control 2 Infected	629654	1.35248e+07	1.39505e+06	1.17696e+07	4.42982e+07	6.19557e+06	662357	1.77024e+06	1.8501e+06	38916.8	1.83929e+07	1.28302e+06	2.52372e+08	1.1502e+08	2.56143e+08	1.00397e+09	9.40923e+08	6.0696e+08	1.51319e+08	897365	3.22387e+10	4.71724e+07	4.25351e+09	1.66588e+08	2.71593e+08	2.14626e+07	549208	3.27406e+06	1.1054e+08	2.13696e+07	1.53335e+06	1.03066e+07	1.58182e+08	4868.01	4.08572e+06	1.91894e+07	2.2542e+07	2.04998e+07	1.87235e+08	559571	6.50413e+06	1.12439e+07	1.08513e+06	5.88603e+09	2.10977e+06	9.86449e+07	644242
			150989	2.30902e+07	6.24727e+06	1.69745e+07	7.27052e+07	3.90531e+06	1.62711e+06	3.94923e+06	4.84078e+06	127864	2.25394e+07	1.36002e+06	3.19188e+08	2.227e+08	4.44361e+08	1.65854e+09	1.52219e+09	1.25713e+09	1.8885e+08	3.35516e+06	5.27248e+10	5.77596e+07	6.96376e+09	2.29458e+08	4.10594e+08	3.17767e+07	893450	3.02007e+06	1.84419e+08	3.14763e+07	834870	1.38199e+07	2.86853e+08	50191.6	6.10381e+06	1.95087e+07	2.29286e+07	3.01253e+07	3.22903e+08	1.3854e+06	2.86644e+06	1.93459e+07	2.20698e+06	9.23805e+09	4.70501e+06	1.44641e+08	905700
			88228.2	2.49754e+07	4.45069e+06	1.79338e+07	1.20451e+08	4.16381e+06	1.67905e+06	4.30951e+06	4.98305e+06	263661	2.99831e+07	3.3797e+06	4.03631e+08	3.1975e+08	3.17875e+08	1.82654e+09	1.4335e+09	5.95669e+08	1.25856e+08	821218	2.8098e+10	7.80456e+07	3.03943e+09	1.91688e+08	2.48397e+08	2.09618e+07	1.40263e+06	2.58249e+06	2.29986e+08	2.14448e+07	3.28803e+06	4.89787e+06	2.38551e+08	117682	9.54233e+06	8.22864e+06	1.27274e+07	2.48389e+07	2.1796e+08	1.45021e+06	4.69138e+06	8.8808e+06	1.85604e+06	4.72969e+09	3.94612e+06	1.80266e+08	390532
			236557	1.99603e+07	2.48003e+06	1.01442e+07	5.45476e+07	2.37067e+06	934964	3.01903e+06	4.14244e+06	137789	2.6477e+07	2.06505e+06	3.59671e+08	2.54757e+08	2.57735e+08	1.30406e+09	8.60866e+08	8.91262e+08	1.93788e+08	2.03137e+06	2.74535e+10	4.37419e+07	6.3652e+09	1.96603e+08	4.02374e+08	2.77941e+07	1.7261e+06	3.73655e+06	1.2612e+08	3.13793e+07	1.6151e+06	2.53557e+07	9.86786e+07	197188	1.15781e+07	2.69555e+07	4.01646e+07	1.73559e+07	2.66252e+08	733094	3.44741e+06	5.84078e+06	2.36264e+06	6.13709e+09	1.81246e+06	1.40964e+08	856554
			68241.3	5.06477e+06	1.03596e+06	4.15205e+06	2.23539e+07	568074	442468	1.01328e+06	901844	128696	1.24767e+07	606102	9.4794e+07	2.26435e+08	9.55445e+07	5.3722e+08	2.01958e+08	4.24701e+08	1.59507e+08	1.46522e+06	2.19469e+10	1.20172e+07	5.61008e+09	1.46227e+08	2.56685e+08	2.45721e+07	70161.9	366127	2.93747e+07	2.56692e+07	725262	1.19875e+07	1.08866e+07	139528	566553	2.67288e+07	2.42989e+07	4.17201e+06	1.89994e+08	130984	1.76473e+06	1.43259e+06	157037	4.26711e+09	194710	7.75079e+07	616319
	F11 - F15	Ak1 RNAi Uninfected	151413	3.13733e+07	8.42045e+06	1.21989e+07	2.26811e+07	1.4372e+06	1.35055e+06	1.80642e+06	1.15331e+07	155803	4.16003e+07	3.74764e+06	7.8783e+08	2.06786e+08	8.38883e+08	1.20983e+09	2.37123e+09	3.08181e+09	2.40016e+08	2.11729e+06	3.96273e+10	1.27932e+08	3.86809e+09	3.50565e+08	6.19181e+08	3.3588e+07	804909	1.58089e+06	3.83951e+08	5.27697e+06	585045	1.17145e+06	2.29132e+08	36499.2	5.99015e+06	9.81896e+06	1.757e+07	4.36726e+07	3.9441e+08	4.16727e+06	1.5975e+06	2.3879e+07	1.40202e+06	1.02066e+10	5.18632e+06	2.6025e+08	926851
			192640	1.6917e+07	3.70782e+06	6.70708e+06	1.55441e+07	749775	583058	1.34239e+06	4.87965e+06	95078.7	2.85705e+07	2.06021e+06	4.74883e+08	2.90781e+08	4.17873e+08	1.12208e+09	9.02907e+08	3.13999e+09	2.25745e+08	4.86313e+06	3.93879e+10	5.72535e+07	7.33758e+09	3.61212e+08	5.31478e+08	3.57142e+07	487556	658315	1.38324e+08	5.79841e+06	460517	5.21812e+06	7.78281e+07	156851	3.7352e+06	3.53543e+07	4.4558e+07	2.30285e+07	3.76486e+08	1.18315e+06	1.8485e+06	8.94308e+06	650318	9.69733e+09	1.17533e+06	1.70316e+08	1.66564e+06
			22252.9	8.49945e+06	1.52655e+06	2.13145e+06	4.36521e+06	144845	170119	527580	3.0446e+06	51885.2	2.21534e+07	1.25554e+06	3.36787e+08	1.78821e+08	3.18928e+08	5.54043e+08	5.73909e+08	4.54141e+09	2.76934e+08	5.60789e+06	4.70373e+10	3.66457e+07	9.28923e+09	4.06061e+08	9.27695e+08	3.93055e+07	144500	342648	9.19432e+07	7.38454e+06	9286.72	6.20404e+06	3.77064e+07	71648.7	958155	3.88381e+07	4.54595e+07	9.67906e+06	4.76375e+08	632398	485017	3.6344e+06	305281	1.22013e+10	664038	1.41706e+08	1.51614e+06
			957265	6.09391e+07	2.80826e+06	7.62081e+06	2.54009e+07	1.18475e+06	674818	2.10989e+06	1.09188e+07	178856	4.79977e+07	4.42007e+06	8.05471e+08	3.44146e+08	5.24902e+08	1.83809e+09	1.22392e+09	2.98256e+09	2.47094e+08	6.87053e+06	4.32482e+10	6.68498e+07	1.0092e+10	3.39023e+08	5.72225e+08	3.33038e+07	1.16884e+06	2.05499e+06	2.22848e+08	6.26079e+06	531060	1.09233e+07	1.56045e+08	96002.2	8.11196e+06	3.8621e+07	4.62808e+07	2.8748e+07	4.64138e+08	2.39507e+06	1.3469e+06	1.84426e+07	1.53754e+06	9.77301e+09	2.78311e+06	1.54285e+08	1.65612e+06
			2.66406e+06	2.07017e+08	1.42632e+06	6.36808e+06	3.97361e+07	1.05879e+06	925908	4.58249e+06	2.47418e+07	271689	1.60424e+08	2.5364e+07	1.44208e+09	5.241e+08	4.6489e+08	2.29433e+09	1.14063e+09	1.17831e+09	9.24702e+07	3.08806e+06	2.06492e+10	6.19117e+07	6.44342e+09	1.9999e+08	1.84247e+08	1.67338e+07	1.80772e+06	2.62441e+06	2.4708e+08	3.85218e+06	1.03262e+06	3.42804e+06	1.4369e+08	1.10652e+06	1.28983e+07	1.18745e+07	3.22493e+07	2.40681e+07	2.43853e+08	3.53503e+06	2.60962e+06	2.19987e+07	3.37639e+06	3.76294e+09	4.39625e+06	1.26045e+08	622229
	F16 - F20	Ak1 RNAi Infected	60227.6	3.98338e+07	3.72972e+07	5.95153e+07	1.65931e+08	4.44367e+06	5.41667e+06	5.92192e+06	1.31021e+07	1.21209e+06	6.75816e+07	2.05706e+07	9.80517e+08	2.57337e+08	6.7876e+08	2.9111e+09	4.92548e+09	1.25686e+09	1.27661e+08	1.12176e+06	3.84489e+10	2.08024e+08	6.92957e+09	2.89154e+08	4.94078e+08	3.8737e+07	921075	1.93674e+06	5.73048e+08	2.28454e+07	1.61202e+06	399083	4.84844e+08	15951.9	6.82267e+06	3.0022e+07	3.71168e+07	5.6206e+07	3.53176e+08	7.04659e+06	4.50732e+06	3.14714e+07	1.60189e+06	8.35534e+09	7.49398e+06	2.84926e+08	700587
			67702.5	2.51734e+07	1.12003e+07	2.56248e+07	7.46622e+07	5.43007e+06	2.52026e+06	4.18498e+06	6.64581e+06	266243	2.9693e+07	2.40231e+06	5.47352e+08	2.70627e+08	5.12968e+08	1.69219e+09	1.81423e+09	1.96484e+09	1.91813e+08	2.29687e+06	4.67427e+10	7.91588e+07	8.3207e+09	2.98978e+08	4.42478e+08	3.68366e+07	1.41758e+06	4.36854e+06	2.41408e+08	1.97112e+07	2.77716e+06	1.40807e+07	1.32773e+08	58371.1	9.95226e+06	4.20444e+07	4.79757e+07	2.53687e+07	3.59502e+08	2.64271e+06	5.81503e+06	1.00938e+07	1.85185e+06	7.87544e+09	3.04471e+06	1.845e+08	1.13061e+06
			4500	4.05258e+06	4.46657e+06	7.90762e+06	1.22873e+07	516499	787096	1.31211e+06	1.35626e+06	91584.9	1.08099e+07	588958	1.49569e+08	1.69124e+08	2.50737e+08	6.62248e+08	4.04878e+08	7.49631e+07	1.652e+07	290125	4.27301e+09	1.63904e+07	3.99811e+08	3.42136e+07	2.12906e+07	1.62663e+06	254527	642948	5.35204e+07	1.65297e+06	325149	742909	1.89719e+07	75406.1	1.84385e+06	1.16446e+06	528562	4.55533e+06	3.7006e+07	389437	1.43969e+06	2.5744e+06	458261	3.13636e+08	628034	8.66149e+07	4500
			124789	1.32009e+07	7.45207e+06	1.5258e+07	4.17727e+07	2.71705e+06	1.22882e+06	3.37998e+06	3.9229e+06	216013	2.05451e+07	1.29907e+06	3.03185e+08	3.80764e+08	3.36731e+08	1.52166e+09	5.39971e+08	2.22539e+06	199168	4500	2.30112e+08	2.37695e+07	1.94393e+07	4500	4500	4500	220998	1.25293e+06	7.81169e+07	40079.4	81297.1	4500	3.61289e+07	199624	1.51608e+06	4500	4500	8.08123e+06	4500	751775	1.11642e+06	7.46255e+06	2.29202e+06	4500	855439	9.99097e+07	4500
			18093.7	1.36161e+07	5.58089e+06	1.44588e+07	4.41684e+07	2.72856e+06	1.09549e+06	2.82234e+06	4.14988e+06	248724	2.47746e+07	2.00026e+06	7.73868e+08	2.21656e+08	3.98842e+08	1.44313e+09	1.23851e+09	2.92771e+06	186493	4500	2.92893e+08	5.53458e+07	2.17565e+07	4500	815523	4500	1.03661e+06	2.18376e+06	1.69527e+08	27208.9	1.03375e+06	4500	2.03785e+08	122447	7.32698e+06	4500	4500	3.32743e+07	4500	1.59303e+06	2.2523e+06	1.20802e+07	2.03987e+06	9.81647e+06	3.15964e+06	1.53187e+08	4500
	Raw data name	Normalized data	Adenosine	Inosine	Adenosine 5'-triphospate	Adenosine 5'-diphosphate	Adenosine 5'-monophosphate	Inosine monophosphate	Guanosine diphospate	Guanosine 5'-monophospahte	Guanosine	Guanine	Xanthine	Hypoxanthine	Uric acid	L-Aspartic acid	Fumaric acid	D- and L-Glutamic acid	L-Proline	L-Methionine	S-Adenosylmethionine	S-Adenosylhomocysteine	Glycine betaine	Glycine	Choline	Betaine aldehyde	Sarcosine	L-Cystathionine	L-Cysteine	gamma-Glutamylcysteine	L-Arginine	Taurine	Cysteic acid	5-Glutamylcystine	0-Acetylserine	S-Sulfocysteine	L-Cystine	L-Glutathione oxidized	Cysteineglutathione disulfide	Sulfolactic acid	D- and L-2-Aminobutyric acid	4-Glutamyl-aminobutanoic acid	Cysteinesulfinic acid	Pyruvic acid	Mercapturic acid	Methionine oxide	N-Formylmethionine	L-Serine	O-Phospho-L-serine
	D1 - D5	Control Uninfected	299614	2.15904e+07	3.05287e+06	6.02847e+06	1.46281e+07	613829	437479	814875	5.51219e+06	56343.5	2.02674e+07	1.69156e+06	3.11264e+08	1.471e+08	2.51892e+08	6.66272e+08	1.04522e+09	1.92088e+09	1.19017e+08	2.92002e+06	1.82708e+10	4.59308e+07	3.07718e+09	1.34079e+08	3.02257e+08	1.88615e+07	458943	1.3054e+06	1.32874e+08	4.79719e+06	344843	3.22004e+06	6.86874e+07	25818.6	3.5617e+06	1.11006e+07	1.85831e+07	1.19155e+07	1.92668e+08	657647	1.35806e+06	1.06748e+07	1.02364e+06	4.68617e+09	1.25869e+06	9.82132e+07	863147
			79670.5	8.37795e+06	955655	5.18436e+06	1.7486e+07	1.71445e+06	317704	807041	3.54339e+06	159302	2.59894e+07	1.17792e+06	3.24758e+08	2.11555e+08	3.9824e+08	6.84702e+08	8.43278e+08	1.96922e+09	2.06925e+08	1.2035e+06	2.35323e+10	4.43926e+07	2.23548e+09	2.56883e+08	3.58864e+08	2.44602e+07	342981	440686	1.07842e+08	4.2201e+06	24345	2.80045e+06	4.18956e+07	675914	2.35635e+06	3.89532e+06	1.55973e+07	1.25234e+07	2.36666e+08	383203	1.09102e+06	1.3432e+07	981877	5.46195e+09	872496	1.73107e+08	511795
			33074.5	1.26695e+07	2.67801e+06	4.815e+06	7.9269e+06	304279	359678	572422	5.20474e+06	92989.1	2.66889e+07	1.18831e+06	3.20022e+08	8.8388e+07	3.59794e+08	4.62841e+08	1.04371e+09	1.02782e+09	1.02177e+08	1.1847e+06	1.17767e+10	3.83322e+07	9.22623e+08	1.26078e+08	2.18233e+08	1.18262e+07	654740	499770	1.3021e+08	3.32414e+06	33683.6	1.23254e+06	4.88318e+07	143595	4.80891e+06	1.80887e+06	7.4246e+06	8.88334e+06	1.12599e+08	488144	1.02242e+06	1.1778e+07	1.27301e+06	2.08154e+09	1.15152e+06	8.53899e+07	192153
			73363.1	2.41584e+07	1.86585e+06	4.27925e+06	8.85361e+06	509826	284780	669384	5.38817e+06	64232.1	6.05759e+07	4.04272e+06	5.72625e+08	7.88821e+07	2.98213e+08	5.23782e+08	7.63656e+08	1.69862e+09	1.37149e+08	1.39135e+06	1.84908e+10	2.83373e+07	4.17705e+09	1.63484e+08	3.56906e+08	1.8521e+07	684868	1.3881e+06	1.09744e+08	4.604e+06	29487	7.1276e+06	4.31545e+07	404670	5.05305e+06	9.89824e+06	2.7294e+07	7.61663e+06	1.74517e+08	390364	859299	1.47201e+07	1.8722e+06	3.75497e+09	1.15444e+06	6.36168e+07	340760
			441013	2.04698e+07	1.01132e+06	3.67419e+06	1.1224e+07	563079	202675	905695	3.94323e+06	268054	3.20013e+07	3.14366e+06	2.94908e+08	2.66995e+08	3.06661e+08	8.67291e+08	7.03368e+08	1.48176e+09	1.83747e+08	2.23837e+06	2.24751e+10	3.16675e+07	3.58508e+09	2.03435e+08	3.35672e+08	1.7956e+07	396983	766178	1.06265e+08	4.68634e+06	404832	4.2312e+06	6.34547e+07	364079	2.91311e+06	1.06648e+07	2.83956e+07	9.31192e+06	1.85588e+08	416926	3.11874e+06	9.51002e+06	759647	4.44486e+09	1.04178e+06	1.08267e+08	558620
	D6 - D10	Control Infected	52416.5	6.68361e+06	5.31911e+06	1.50628e+07	5.21463e+07	2.1493e+06	950908	2.69239e+06	1.66952e+06	287260	2.13467e+07	1.5866e+06	2.17786e+08	6.50307e+08	3.60153e+08	1.74942e+09	7.44243e+08	9.92828e+08	3.63384e+08	6.38249e+06	2.51956e+10	3.44807e+07	1.15316e+10	2.08075e+08	4.55046e+08	6.46977e+07	56251	1.48196e+06	7.86693e+07	2.17635e+07	46987.1	2.70709e+07	2.7514e+07	468929	511862	6.41184e+07	4.32155e+07	4.01317e+06	3.16759e+08	434149	1.15668e+06	6.83637e+06	1.63214e+06	3.52122e+09	1.03944e+06	1.52329e+08	813001
			28356.7	6.81087e+06	4.87354e+06	1.3354e+07	5.44871e+07	1.26526e+06	1.07082e+06	2.133e+06	2.1025e+06	94077.2	1.11153e+07	845532	2.32318e+08	1.17955e+08	2.48404e+08	8.39991e+08	1.09079e+09	1.09207e+09	1.47541e+08	2.07119e+06	1.65325e+10	4.14821e+07	4.07361e+09	1.31255e+08	3.85514e+08	2.69213e+07	499576	1.39136e+06	1.06204e+08	1.54556e+07	193456	8.36135e+06	4.21398e+07	113599	3.66901e+06	1.85887e+07	2.34721e+07	8.24219e+06	1.86004e+08	652022	1.17444e+06	1.02663e+07	1.5727e+06	3.19133e+09	992491	6.93013e+07	511998
			11542.1	1.57797e+07	6.00331e+06	1.08337e+07	4.00497e+07	1.73597e+06	927086	1.7666e+06	4.73398e+06	177288	2.26032e+07	2.86445e+06	3.14987e+08	8.17575e+07	1.75293e+08	6.69304e+08	1.12037e+09	1.17737e+08	1.17892e+07	405901	2.97235e+09	4.03496e+07	6.70661e+08	3.05995e+07	5.63468e+07	3.81959e+06	514894	815575	1.20074e+08	3.14734e+06	1.81755e+06	170875	5.42563e+07	84240.1	3.80931e+06	1.95746e+06	4.87014e+06	8.46756e+06	3.08421e+07	591206	2.91896e+06	5.86536e+06	393905	4.75251e+08	1.21225e+06	5.79431e+07	67273.6
			59196.6	1.20784e+07	3.65377e+06	9.78298e+06	3.8767e+07	1.56491e+06	1.01271e+06	2.28477e+06	3.18064e+06	88130	1.44653e+07	769548	3.02776e+08	1.70264e+08	2.66399e+08	1.07888e+09	7.3808e+08	2.52171e+09	2.63121e+08	3.91465e+06	3.82046e+10	3.36121e+07	8.62303e+09	2.48918e+08	8.17345e+08	5.45306e+07	347910	1.06552e+06	8.74927e+07	2.05761e+07	115205	9.45669e+06	3.48734e+07	325936	2.60316e+06	5.14567e+07	4.36087e+07	1.21273e+07	2.60222e+08	390400	1.6311e+06	1.03409e+07	2.06855e+06	6.2503e+09	909962	9.50123e+07	2.03177e+06
			104912	1.68565e+07	6.08234e+06	1.07695e+07	2.61828e+07	582933	1.03087e+06	1.30792e+06	4.8166e+06	97897.1	1.85209e+07	887125	3.22683e+08	2.12703e+08	2.36165e+08	1.19176e+09	1.07646e+09	1.96775e+09	1.93154e+08	3.44691e+06	3.66002e+10	4.7398e+07	1.02544e+10	2.43626e+08	7.80928e+08	4.86489e+07	328900	909409	9.58855e+07	1.87807e+07	444728	3.08797e+06	4.67811e+07	148891	2.433e+06	2.16225e+07	4.68094e+07	1.65331e+07	2.41507e+08	518520	1.43086e+06	7.49396e+06	810913	5.63761e+09	674032	1.2244e+08	2.00023e+06
	D11 - D15	Adk3 RNAi Uninfected	44226.9	1.28019e+07	3.6134e+06	4.92403e+06	6.68863e+06	240568	313060	537229	5.07891e+06	69036.1	2.36401e+07	1.6238e+06	3.1177e+08	1.58904e+08	3.85518e+08	4.69492e+08	1.00284e+09	4.27089e+08	4.47325e+07	672176	8.28731e+09	5.47042e+07	4.66745e+08	8.77644e+07	6.82839e+07	5.02229e+06	223316	592898	1.50083e+08	1.04593e+06	64718	514037	7.63449e+07	74837.1	1.83443e+06	556000	2.23132e+06	1.69925e+07	6.08827e+07	627774	337593	1.61847e+07	623694	1.61969e+09	1.15163e+06	1.21759e+08	6874.99
			54848.8	1.23773e+07	3.0478e+06	6.09616e+06	1.10567e+07	277385	323160	732290	5.77308e+06	153522	3.30745e+07	2.03972e+06	3.169e+08	2.94428e+08	4.36885e+08	8.37574e+08	8.31172e+08	2.34848e+08	2.55882e+07	340165	5.23181e+09	5.05015e+07	3.33316e+08	6.5781e+07	3.98506e+07	2.09398e+06	104618	600586	1.4061e+08	512988	5250.84	253430	5.94214e+07	497032	873423	256670	812025	1.50988e+07	6.46659e+07	544915	617803	1.30177e+07	701585	8.34734e+08	868025	1.65548e+08	5250.84
			17840.5	1.01982e+07	2.90641e+06	4.0602e+06	6.06198e+06	22569	292696	333823	4.03846e+06	61407.3	2.09621e+07	1.58246e+06	1.50707e+08	1.26814e+08	3.56323e+08	4.53305e+08	1.06882e+09	2.29087e+09	1.74312e+08	2.17054e+06	2.50174e+10	5.07921e+07	2.81062e+09	1.79284e+08	3.87648e+08	1.39158e+07	358485	432929	1.3753e+08	5.62933e+06	108421	638000	8.84866e+07	55919.5	2.76236e+06	2.23061e+06	9.34497e+06	1.51653e+07	1.51101e+08	579796	557368	1.52919e+07	443497	6.89076e+09	1.48743e+06	1.02832e+08	480185
			48572.9	9.92913e+06	1.34642e+06	3.6333e+06	9.10892e+06	230736	136961	748078	4.92096e+06	160869	3.38041e+07	1.79858e+06	2.40146e+08	4.12374e+08	4.65202e+08	8.79672e+08	1.00776e+09	1.94902e+09	2.742e+08	1.99231e+06	2.91948e+10	4.40124e+07	4.01625e+09	3.11992e+08	4.28876e+08	2.51074e+07	94298.9	447397	1.31597e+08	6.49659e+06	5836.31	3.46954e+06	6.06739e+07	447913	839682	7.49305e+06	1.20027e+07	1.41562e+07	2.63138e+08	471363	583145	1.17269e+07	494049	8.35306e+09	1.0167e+06	1.72484e+08	856734
			320699	3.95063e+07	2.33567e+06	4.9998e+06	1.50843e+07	549690	370985	932602	6.71238e+06	53847.1	4.19865e+07	6.69263e+06	3.61843e+08	1.59399e+08	1.98471e+08	7.8701e+08	8.66367e+08	5.38937e+08	5.61444e+07	680717	8.06329e+09	3.94434e+07	2.24654e+09	6.61964e+07	8.52549e+07	5.75067e+06	525659	1.48236e+06	1.10453e+08	2.11567e+06	216042	1.96863e+06	6.74432e+07	42437.4	3.75609e+06	9.06982e+06	1.49463e+07	8.16329e+06	7.25671e+07	905411	628735	1.20695e+07	1.59823e+06	2.07587e+09	1.44093e+06	4.80414e+07	210226
	D16 - D20	Adk3 RNAi Infected	22787.7	1.1829e+07	4.21645e+06	9.30003e+06	1.9157e+07	543958	615544	1.0963e+06	4.4745e+06	102181	1.72989e+07	1.25794e+06	2.14809e+08	1.90261e+08	2.35009e+08	9.30983e+08	1.15812e+09	1.16915e+09	1.75032e+08	1.99901e+06	1.85417e+10	4.63124e+07	4.88525e+09	1.70177e+08	3.07494e+08	2.52361e+07	405496	2.74486e+06	1.37203e+08	1.89479e+07	161945	1.52372e+07	5.18154e+07	116172	2.98854e+06	2.17332e+07	2.50565e+07	1.08842e+07	2.4977e+08	488054	891885	1.24717e+07	1.5887e+06	6.56418e+09	954011	1.34101e+08	572901
			46964.4	1.49925e+07	8.17937e+06	1.58495e+07	3.11752e+07	654956	1.09541e+06	1.28948e+06	5.4081e+06	123058	2.56357e+07	2.39263e+06	2.98203e+08	3.29133e+08	2.29941e+08	1.25635e+09	1.21506e+09	4.14326e+08	9.47193e+07	1.05585e+06	8.669e+09	5.80588e+07	1.84414e+09	1.14447e+08	1.66758e+08	1.33217e+07	145132	1.64249e+06	1.39847e+08	1.05266e+07	153806	3.81338e+06	4.90994e+07	71943.5	1.10955e+06	5.81586e+06	5.75128e+06	1.15994e+07	1.29305e+08	504111	745942	9.8268e+06	1.04592e+06	3.03622e+09	1.03298e+06	1.78597e+08	175117
			47733.8	1.14233e+07	5.64869e+06	1.12018e+07	2.96566e+07	717408	900243	1.03385e+06	4.66237e+06	124277	1.73162e+07	1.27544e+06	1.69625e+08	1.69064e+08	2.28052e+08	7.60237e+08	1.11785e+09	8.42344e+08	1.26396e+08	1.59413e+06	1.31024e+10	5.37674e+07	2.59948e+09	1.40107e+08	3.04366e+08	1.69858e+07	599434	834813	1.2982e+08	1.64649e+07	2.8235e+06	2.66139e+06	4.9263e+07	79727.9	4.29769e+06	9.10295e+06	1.88842e+07	9.01908e+06	1.87944e+08	475942	3.0703e+06	3.56829e+06	393797	4.98975e+09	803496	1.19416e+08	372815
			245641	1.88639e+07	2.68156e+06	9.05981e+06	2.22729e+07	963931	543290	1.29809e+06	5.3265e+06	238405	3.31315e+07	2.73515e+06	3.10068e+08	3.91923e+08	2.40269e+08	1.2619e+09	1.03084e+09	8.91024e+08	1.78732e+08	1.69355e+06	1.982e+10	4.69788e+07	5.42128e+09	2.31135e+08	4.58883e+08	3.07538e+07	343597	2.51148e+06	1.16414e+08	3.23563e+07	143252	1.7033e+07	3.30919e+07	316261	2.1409e+06	1.16486e+07	1.80961e+07	1.35876e+07	2.75334e+08	409992	885667	7.89188e+06	1.04214e+06	8.87686e+09	545989	1.85649e+08	681848
			25397.7	1.06331e+07	5.01673e+06	8.88383e+06	1.51049e+07	18347	480342	814653	4.43976e+06	211621	2.69818e+07	1.386e+06	3.33129e+08	2.93794e+08	2.88227e+08	1.05743e+09	1.22825e+09	1.98759e+08	3.92692e+07	349671	5.34378e+09	5.04057e+07	7.7931e+08	7.36903e+07	1.03257e+08	8.73743e+06	404379	1.28335e+06	1.32502e+08	9.19203e+06	254796	1.06962e+06	4.83125e+07	341522	2.55712e+06	1.83795e+06	5.26525e+06	1.63526e+07	8.15206e+07	526787	793675	7.85323e+06	805029	2.2239e+09	640330	1.92156e+08	107885
	F1 - F5	Control 2 Uninfected	327170	2.91069e+07	1.58295e+06	4.7163e+06	2.12245e+07	1.47796e+06	636500	1.29033e+06	6.01918e+06	76096.9	2.17551e+07	2.14754e+06	3.37267e+08	1.0435e+08	2.28592e+08	7.14134e+08	6.19682e+08	1.30793e+09	8.81226e+07	2.84986e+06	1.91697e+10	4.20914e+07	4.39397e+09	1.2715e+08	2.19659e+08	2.12052e+07	386525	848336	1.25897e+08	5.16092e+06	470321	129194	8.54524e+07	23111	2.96135e+06	1.78568e+07	2.58661e+07	1.53991e+07	1.38168e+08	892006	1.33212e+06	1.02981e+07	633567	4.50607e+09	1.70842e+06	5.92439e+07	720378
			1.05283e+06	5.5741e+07	245768	3.14255e+06	2.50715e+07	777157	276659	1.80675e+06	9.48812e+06	252631	4.10479e+07	5.50059e+06	4.467e+08	3.18533e+08	2.16102e+08	1.12536e+09	5.77145e+08	6.582e+07	2.37539e+07	513150	5.4354e+09	2.80116e+07	8.471e+08	5.70947e+07	2.78338e+07	2.46686e+06	507323	349323	1.10328e+08	1.76583e+06	4.88777e+06	225961	6.67038e+07	110953	3.85762e+06	1.71449e+06	3.17717e+06	1.20681e+07	3.90953e+07	515029	3.21351e+06	1.89786e+06	197438	8.2268e+08	386314	1.08792e+08	52826.1
			684572	4.24116e+07	1.60161e+06	5.54728e+06	2.38584e+07	1.24044e+06	598885	1.73452e+06	6.83365e+06	208736	2.43034e+07	3.16327e+06	3.28035e+08	2.35077e+08	2.0908e+08	9.31338e+08	5.92675e+08	1.05695e+09	1.26741e+08	1.45763e+06	2.95562e+10	2.93814e+07	5.11229e+09	1.71717e+08	2.08121e+08	1.64563e+07	477283	628532	1.06244e+08	7.33393e+06	1.51119e+06	3.45925e+06	6.90148e+07	133886	3.45144e+06	9.70001e+06	2.01558e+07	1.07458e+07	2.04172e+08	582427	3.39806e+06	6.54863e+06	414311	5.31155e+09	775940	9.27882e+07	1.03356e+06
			445070	2.24772e+07	1.62421e+06	4.17653e+06	1.10563e+07	681371	374212	966779	4.02403e+06	111695	4.02993e+07	2.73466e+06	3.76385e+08	2.90227e+08	3.58547e+08	9.44108e+08	6.30517e+08	1.89156e+09	2.00907e+08	4.04986e+06	4.03604e+10	3.03991e+07	5.79481e+09	2.80894e+08	4.86304e+08	3.4387e+07	327361	665468	1.09938e+08	9.36553e+06	327033	5.37048e+06	7.09912e+07	128323	2.56992e+06	2.15708e+07	3.30793e+07	1.52702e+07	3.30538e+08	645704	1.32997e+06	7.02725e+06	534523	7.72123e+09	1.1054e+06	1.1469e+08	1.48558e+06
			785567	5.7667e+07	316742	2.59523e+06	1.55763e+07	511265	204209	1.0579e+06	5.88725e+06	66576.6	3.37965e+07	2.96446e+06	3.13517e+08	2.66958e+08	2.16824e+08	9.3608e+08	4.18872e+08	4.10865e+08	1.0174e+08	1.10938e+06	2.23131e+10	2.82351e+07	4.12214e+09	1.54938e+08	2.34954e+08	1.53527e+07	674897	406132	8.94573e+07	5.20978e+06	6.24916e+06	2.12772e+06	8.30507e+07	51379.9	4.92525e+06	1.6526e+07	1.52929e+07	1.25677e+07	1.96509e+08	621590	4.07256e+06	2.41077e+06	249606	4.4644e+09	700706	7.31719e+07	1.14252e+06
	F6 - F10	Control 2 Infected	446704	9.59507e+06	989713	8.3499e+06	3.14271e+07	4.39541e+06	469905	1.25588e+06	1.31255e+06	27609.3	1.30487e+07	910228	1.79044e+08	8.16002e+07	1.8172e+08	7.12261e+08	6.67533e+08	4.30604e+08	1.07352e+08	636631	2.28716e+10	3.34662e+07	3.01763e+09	1.18185e+08	1.9268e+08	1.52265e+07	389632	2.32277e+06	7.84219e+07	1.51605e+07	1.08783e+06	7.31196e+06	1.12221e+08	3453.58	2.89859e+06	1.36138e+07	1.59923e+07	1.45435e+07	1.32832e+08	396985	4.61431e+06	7.9769e+06	769837	4.17581e+09	1.49677e+06	6.9983e+07	457054
			74790	1.14374e+07	3.09449e+06	8.40808e+06	3.60135e+07	1.93444e+06	805966	1.95619e+06	2.39781e+06	63335.7	1.11646e+07	673667	1.58105e+08	1.10311e+08	2.20108e+08	8.21532e+08	7.53995e+08	6.227e+08	9.35442e+07	1.66193e+06	2.61165e+10	2.86104e+07	3.4494e+09	1.13658e+08	2.03382e+08	1.57401e+07	442558	1.49595e+06	9.13491e+07	1.55913e+07	413541	6.84549e+06	1.42089e+08	24861.7	3.02343e+06	9.66335e+06	1.13573e+07	1.49221e+07	1.59945e+08	686239	1.41985e+06	9.58272e+06	1.09319e+06	4.57594e+09	2.33056e+06	7.16461e+07	448626
			40036.5	1.13334e+07	2.01965e+06	8.13804e+06	5.46588e+07	1.88947e+06	761923	1.95558e+06	2.26122e+06	119645	1.36058e+07	1.53365e+06	1.83161e+08	1.45097e+08	1.44246e+08	8.28855e+08	6.50496e+08	2.70304e+08	5.71115e+07	372655	1.27504e+10	3.54158e+07	1.37924e+09	8.6985e+07	1.12718e+08	9.5121e+06	636491	1.17189e+06	1.04364e+08	9.7313e+06	1.49205e+06	2.22257e+06	1.08251e+08	53402.2	4.33015e+06	3.73402e+06	5.77546e+06	1.12715e+07	9.89064e+07	658083	2.12887e+06	4.02996e+06	842238	2.14625e+09	1.79068e+06	8.18018e+07	177217
			147725	1.24648e+07	1.54873e+06	6.33486e+06	3.40638e+07	1.48043e+06	583865	1.88532e+06	2.58687e+06	86046.2	1.65343e+07	1.28958e+06	2.24607e+08	1.5909e+08	1.6095e+08	8.1436e+08	5.37592e+08	5.56574e+08	1.21017e+08	1.26855e+06	1.71441e+10	2.73159e+07	3.97493e+09	1.22774e+08	2.51274e+08	1.73568e+07	1.07791e+06	2.3334e+06	7.87593e+07	1.95957e+07	1.00859e+06	1.58341e+07	6.16227e+07	123140	7.23029e+06	1.68331e+07	2.5082e+07	1.08384e+07	1.66268e+08	457801	2.15284e+06	3.64744e+06	1.47542e+06	3.83248e+09	1.13184e+06	8.80288e+07	534900
			173755	1.28958e+07	2.63775e+06	1.05719e+07	5.69171e+07	1.44642e+06	1.1266e+06	2.57998e+06	2.29626e+06	327682	3.1768e+07	1.54325e+06	2.41363e+08	5.76545e+08	2.43274e+08	1.36786e+09	5.14221e+08	1.08137e+09	4.06135e+08	3.73073e+06	5.58807e+10	3.05979e+07	1.42843e+10	3.7232e+08	6.53566e+08	6.25651e+07	178645	932227	7.47933e+07	6.53585e+07	1.84665e+06	3.05225e+07	2.77193e+07	355264	1.44255e+06	6.80565e+07	6.18694e+07	1.06227e+07	4.83759e+08	333509	4.49332e+06	3.64762e+06	399846	1.08648e+10	495767	1.97349e+08	1.56926e+06
	F11 - F15	Ak1 RNAi Uninfected	58192.2	1.20577e+07	3.23622e+06	4.6884e+06	8.71701e+06	552358	519057	694258	4.43251e+06	59879.4	1.59882e+07	1.44032e+06	3.02786e+08	7.94739e+07	3.22407e+08	4.64971e+08	9.11331e+08	1.18443e+09	9.22452e+07	813735	1.52299e+10	4.9168e+07	1.48662e+09	1.34732e+08	2.37969e+08	1.29088e+07	309350	607581	1.47563e+08	2.02809e+06	224850	450224	8.80622e+07	14027.7	2.30219e+06	3.77371e+06	6.75264e+06	1.67846e+07	1.51583e+08	1.6016e+06	613963	9.17737e+06	538835	3.9227e+09	1.99325e+06	1.00022e+08	356215
			149297	1.31107e+07	2.87359e+06	5.19802e+06	1.20468e+07	581080	451873	1.04036e+06	3.78176e+06	73686.6	2.21424e+07	1.59668e+06	3.68037e+08	2.25357e+08	3.23854e+08	8.6962e+08	6.99759e+08	2.43351e+09	1.74954e+08	3.76896e+06	3.05258e+10	4.43718e+07	5.68667e+09	2.79941e+08	4.11898e+08	2.76787e+07	377859	510198	1.07202e+08	4.49381e+06	356904	4.04408e+06	6.03173e+07	121560	2.8948e+06	2.73998e+07	3.45327e+07	1.78472e+07	2.91779e+08	916951	1.4326e+06	6.93094e+06	504000	7.51549e+09	910889	1.31996e+08	1.29088e+06
			31720.2	1.21154e+07	2.17601e+06	3.03825e+06	6.22234e+06	206468	242494	752033	4.33989e+06	73959.1	3.15782e+07	1.78969e+06	4.80069e+08	2.54898e+08	4.54612e+08	7.89753e+08	8.18073e+08	6.47351e+09	3.94753e+08	7.9937e+06	6.70488e+10	5.22362e+07	1.32412e+10	5.78815e+08	1.32237e+09	5.60275e+07	205976	488424	1.31059e+08	1.05262e+07	13237.7	8.84348e+06	5.37482e+07	102131	1.36579e+06	5.53614e+07	6.47997e+07	1.37969e+07	6.79043e+08	901444	691362	5.18061e+06	435159	1.73921e+10	946546	2.01994e+08	2.16117e+06
			459775	2.92691e+07	1.34881e+06	3.66028e+06	1.22001e+07	569038	324115	1.01338e+06	5.2443e+06	85904.7	2.30533e+07	2.12296e+06	3.86868e+08	1.65294e+08	2.52111e+08	8.82836e+08	5.87849e+08	1.43252e+09	1.18679e+08	3.29992e+06	2.07721e+10	3.2108e+07	4.84719e+09	1.62833e+08	2.7484e+08	1.59958e+07	561394	987013	1.07034e+08	3.00706e+06	255068	5.24646e+06	7.49482e+07	46109.9	3.89618e+06	1.85497e+07	2.22287e+07	1.38077e+07	2.22926e+08	1.15036e+06	646917	8.85799e+06	738479	4.69398e+09	1.33673e+06	7.41031e+07	795436
			910681	7.07665e+07	487573	2.17686e+06	1.35834e+07	361935	316512	1.56648e+06	8.45772e+06	92874	5.48391e+07	8.67041e+06	4.9296e+08	1.79158e+08	1.58918e+08	7.84294e+08	3.89913e+08	4.02791e+08	3.161e+07	1.05562e+06	7.05872e+09	2.11639e+07	2.20261e+09	6.83646e+07	6.29828e+07	5.72026e+06	617950	897127	8.44616e+07	1.31683e+06	352990	1.17184e+06	4.9119e+07	378252	4.40913e+06	4.05917e+06	1.10241e+07	8.22743e+06	8.33585e+07	1.20841e+06	892070	7.52003e+06	1.15418e+06	1.28632e+09	1.50281e+06	4.30873e+07	212702
	F16 - F20	Ak1 RNAi Infected	12748.9	8.43199e+06	7.89506e+06	1.25982e+07	3.51241e+07	940634	1.1466e+06	1.25355e+06	2.77344e+06	256574	1.43056e+07	4.35438e+06	2.07555e+08	5.44728e+07	1.4368e+08	6.1622e+08	1.04262e+09	2.66052e+08	2.70232e+07	237454	8.13884e+09	4.40344e+07	1.46685e+09	6.12078e+07	1.04586e+08	8.19982e+06	194973	409967	1.21302e+08	4.83591e+06	341231	84477.7	1.02631e+08	3376.68	1.44422e+06	6.35505e+06	7.85686e+06	1.18976e+07	7.476e+07	1.49162e+06	954107	6.66184e+06	339088	1.76865e+09	1.58632e+06	6.03129e+07	148300
			27832.2	1.03487e+07	4.6044e+06	1.05342e+07	3.06933e+07	2.23228e+06	1.03607e+06	1.72043e+06	2.73206e+06	109451	1.22067e+07	987578	2.25014e+08	1.11254e+08	2.10879e+08	6.95652e+08	7.4582e+08	8.07739e+08	7.88534e+07	944231	1.92157e+10	3.25419e+07	3.4206e+09	1.22909e+08	1.81901e+08	1.51434e+07	582761	1.79589e+06	9.92418e+07	8.10318e+06	1.14168e+06	5.78851e+06	5.45826e+07	23996.1	4.09133e+06	1.72843e+07	1.97226e+07	1.04289e+07	1.4779e+08	1.08641e+06	2.39053e+06	4.1495e+06	761286	3.23756e+09	1.25167e+06	7.58472e+07	464790
			7495.71	6.75044e+06	7.44002e+06	1.31718e+07	2.04671e+07	860340	1.31108e+06	2.1856e+06	2.25914e+06	152554	1.80062e+07	981036	2.49139e+08	2.81713e+08	4.17656e+08	1.10312e+09	6.74411e+08	1.24867e+08	2.75176e+07	483265	7.11761e+09	2.73016e+07	6.6597e+08	5.699e+07	3.5464e+07	2.70951e+06	423968	1.07097e+06	8.91496e+07	2.75337e+06	541605	1.23747e+06	3.16018e+07	125605	3.07133e+06	1.93966e+06	880432	7.58788e+06	6.16414e+07	648690	2.39812e+06	4.28821e+06	763331	5.22428e+08	1.04613e+06	1.44276e+08	7495.71
			123671	1.30827e+07	7.38529e+06	1.51213e+07	4.13983e+07	2.6927e+06	1.21781e+06	3.3497e+06	3.88775e+06	214078	2.03609e+07	1.28743e+06	3.00468e+08	3.77352e+08	3.33714e+08	1.50803e+09	5.35132e+08	2.20545e+06	197383	4459.68	2.2805e+08	2.35565e+07	1.92652e+07	4459.68	4459.68	4459.68	219018	1.2417e+06	7.74169e+07	39720.3	80568.6	4459.68	3.58052e+07	197835	1.5025e+06	4459.68	4459.68	8.00882e+06	4459.68	745038	1.10641e+06	7.39568e+06	2.27148e+06	4459.68	847773	9.90144e+07	4459.68
			9994.04	7.52084e+06	3.08261e+06	7.98631e+06	2.43964e+07	1.50712e+06	605092	1.55892e+06	2.29219e+06	137383	1.36843e+07	1.10484e+06	4.27446e+08	1.22432e+08	2.20301e+08	7.97114e+08	6.84094e+08	1.61712e+06	103010	2485.58	1.6178e+08	3.05703e+07	1.20172e+07	2485.58	450454	2485.58	572573	1.2062e+06	9.36385e+07	15028.8	570994	2485.58	1.12561e+08	67633.8	4.04706e+06	2485.58	2485.58	1.83791e+07	2485.58	879910	1.24406e+06	6.67252e+06	1.12672e+06	5.42213e+06	1.74523e+06	8.46129e+07	2485.58
[truncated: 42 more columns]

## Sheet: S4
	Experiment:	Combination of quantitative analysis (ng/sample) and peak area of metabolites of interest for Adk3 RNAi and Ak1 RNAi hemocytes incubated with 13C5 adenosine
	Internal Code:	220608
	Tested groups:	Control 1 Uninfected	BDSC 36304 x SrpGal4Gal80
		Control 1 Infected
		Control 2 Uninfected	BDSC 36303 x SrpGal4Gal80
		Control 2 Infected
			Quantitative analysis (ng/sample)												Peak area
	Raw data name		Adenosine	Adenosine_13C5	Inosine	Inosine_13C5	Inosine monophosphate	Inosine monophosphate_13C5	Adenosine 5'-monophosphate	Adenosine 5'-monophosphate_13C5	Adenosine 5'-diphosphate	Adenosine 5'-diphosphate_13C5	Adenosine 5'-triphospate	Adenosine 5'-triphospate_13C5	S-Adenosylmethionine	S-Adenosylmethionine_13C5
	bCTRL	Control 1 Uninfected	3.43145	0.108909	38.5645	7.22353	17.2444	1.3104	75.2492	3.51622	78.964	0	106.879	6.3636	2.71449e+08	79822.8
			1.60171	0.038973	19.9459	3.29751	6.23795	0.661178	27.9896	1.48084	48.3735	4.32944	62.9744	4.87397	2.46394e+08	124584
			0.953744	0.107344	12.455	5.9809	8.6965	0.904307	40.6391	2.34472	44.1965	2.48152	58.5391	5.11324	1.40531e+08	59606.9
			1.61524	0.0324747	14.5956	5.81897	7.9204	1.1196	41.8114	2.13479	86.8187	2.54461	153.259	7.6013	2.48229e+08	314697
	bINF	Control 1 Infected	2.42656	0.0221082	19.4283	2.49784	21.8819	1.78221	182.537	3.1426	64.6548	3.16129	33.0859	4.79326	2.07438e+08	1.08977e+06
			0.971213	0.0260179	17.6741	4.50202	29.3976	2.87461	284.973	5.95484	201.557	5.55722	193.877	5.53653	1.84454e+08	1.05236e+06
			0.532678	0.0207299	6.65912	4.32993	13.6968	3.94075	161.124	6.42267	182.992	9.47775	209.074	9.77794	1.72971e+08	2.39287e+06
	aCTRL	Control 2 Uninfected	3.13435	0.0293063	72.9574	6.10611	15.5111	0	47.8587	1.29487	23.4247	0	20.2363	4.79326	1.58829e+08	24085.2
			2.36056	0.0566953	45.2337	7.93898	19.984	1.39083	106.229	5.32387	81.5461	0	102.845	7.24637	1.74957e+08	102624
			1.5454	1.27016	22.5611	9.23448	10.1479	1.05504	99.1737	8.40197	73.4114	0	76.3417	6.1874	1.77035e+08	56563
			3.32126	0.0348347	101.239	15.3077	12.9786	0.737549	115.946	4.30307	55.0932	0	71.1631	5.33121	2.22639e+08	15817.6
			0.888243	0.0227952	19.3805	7.20717	11.6092	1.89024	60.074	3.66841	91.7921	0	153.332	9.95107	1.79649e+08	144234
	aINF	Control 2 Infected	1.11999	0.0244787	34.7407	12.7806	42.5915	4.34398	632.757	28.1189	263.555	0	263.769	12.4209	1.64085e+08	178164
			0.684517	0.0207299	17.5315	5.8553	25.6418	2.1871	238.693	5.49449	177.364	0	192.341	6.48843	1.47974e+08	194489
			2.10006	0.0207299	30.536	7.49487	22.5535	2.88082	189.217	4.98835	178.312	2.79848	235.429	8.43273	1.63086e+08	759213
			1.30966	0.0248837	21.2748	6.44065	22.6892	3.06446	192.079	6.53394	168.395	0	188.816	7.36018	1.49339e+08	713116
			3.32595	0.0257764	52.6322	5.28403	33.7041	1.25796	341.923	3.68099	211.878	0	213.255	4.97321	2.62569e+08	232735
