# Supplementary material for: SAM transmethylation pathway and adenosine recycling to ATP are essential for systemic regulation and immune response
Source: bioRxiv preprint, doi:10.1101/2024.11.13.623428, version 2 (2025-01-29)
Supplement: S4_Data [file 623428_file05.xlsx]

## Sheet: Circulating Hemocytes
Bulk RNAseq from circulating hemocytes of uninfected third instar larvae and infected by parasitoid wasp. Gene expression in transcripts per million (TPM)																																					Average TPM						DESeq2: 9 hours uninfected vs infected
0 hours = time of infection = 72 hours after egg laying; 9 hours = 9 hours after infection = 81 hours after egg laying; 18 hours = 18 hours after infection = 90 hours after egg laying
	0 hours						9 hours uninfected						9 hours infected						18 hours uninfected						18 hours infected																			Absolute Confidence	Adjusted p-value	Confidence	Log2 Ratio	Log2 Standard Error	p-value
gene	T0CA	T0CB	T0CC	T0CD	T0CE	T0CF	T9CA	T9CB	T9CC	T9CD	T9CE	T9CF	T9iA	T9iB	T9iC	T9iD	T9iE	T9iF	T18CA	T18CB	T18CC	T18CD	T18CE	T18CF	T18iA	T18iB	T18iC	T18iD	T18iE	T18iF	T18iG	T18iH	T18iI	T18iJ		gene	T0	T9C	T9i	T18C	T18i		gene
312	2.75	4.44	2.81	3.98	4.73	3.21	3.58	2.65	6.31	3.12	3.53	1.88	1.78	3.28	3.49	3.51	4.88	4.18	2.52	3.2	2	3.86	2.57	2.47	2.94	5.68	2.03	5.74	1.58	2.25	2.18	5.34	1.49	1.61		312	3.65333	3.51167	3.52	2.77	3.084		312	1.06	0.0863072	-1.06	-0.527889	0.242344	0.0293868
2mit	0.17	0.13	0.17	0.18	0.29	0.32	0.17	0.13	0.17	0.26	0.21	0.13	0.34	0.36	0.33	0.34	0.32	0.27	0.15	0.1	0.22	0.21	0.11	0.36	0.28	0.21	0.44	0.47	0.49	0.21	0.18	0.32	0.37	0.17		2mit	0.21	0.178333	0.326667	0.191667	0.314		2mit	0.57	0.271064	0.57	0.311159	0.200983	0.121578
2SrRNA-Psi:CR40677	1219.56	3019.56	3637.6	2789.65	7625.35	1472.06	6906.87	26274.3	15196.6	1996.42	1456.47	1564.08	20417	8548.28	9973.02	7892.28	7986.35	1843.95	7535.9	2464.66	3391.61	9376.78	16724.9	7500.56	11340.9	12013.3	26099.1	29544.9	19181.9	13433.5	19348	9868.16	53637.1	17437.3		2SrRNA-Psi:CR40677	3293.96	8899.12	9443.48	7832.41	21190.4		2SrRNA-Psi:CR40677	0.13	0.744966	-0.13	-0.464856	0.718013	0.51736
2SrRNA-Psi:CR45858	1250.35	3082.47	3926.92	2932.89	7826.02	1593.44	6989.74	26020.8	14403.2	1980.82	1439.29	1468.37	20425	8038.55	9765.94	7818.82	7912.09	1928.4	7517.16	2462.77	3459.1	9256.8	16076.2	8085.33	10885	12105	24205.8	29292.6	18650.1	13050.3	18570	9795.69	53782.9	17127.8		2SrRNA-Psi:CR45858	3435.35	8717.04	9314.79	7809.56	20746.5		2SrRNA-Psi:CR45858	0.12	0.750521	-0.12	-0.458355	0.718617	0.523585
2SrRNA:CR45864	3.42	34.31	31.56	19.42	48.94	10.33	57.65	288.23	139.45	17.83	19.09	26.1	79.52	93.62	132.94	67.82	55.09	22.52	41.65	52.96	33.75	101.15	234.61	59.67	128.15	126	278.5	311.75	313.7	135.24	181.38	95.52	874.78	181		2SrRNA:CR45864	24.6633	91.3917	75.2517	87.2983	262.602		2SrRNA:CR45864	0.39	0.40553	-0.39	-0.890514	0.705067	0.206582
4E-T	3.45	4.02	3.57	3.06	7.37	4.14	2.9	3.76	5.55	3.63	3.9	3.09	4.74	6.72	8.37	9.23	7.01	4.12	4.21	2.83	3.34	3.81	3.43	4.05	4.7	5.64	8.65	8.11	5.06	2.96	3.85	6.35	5.06	5.45		4E-T	4.26833	3.805	6.69833	3.61167	5.583		4E-T	0.39	0.404913	0.39	0.243754	0.192812	0.206157
5-HT1A	0.23	0.04	0.08	0.25	0.16	0.21	0.1	0.1	0.13	0.17	0.11	0.04	0.06	0.4	0.31	0.2	0.4	0.19	0.07	0.04	0.12	0.15	0.07	0.24	0.12	0.18	0.39	0.62	0.65	0.15	0.11	0.14	0.71	0.14		5-HT1A	0.161667	0.108333	0.26	0.115	0.321		5-HT1A	0.7	0.200895	0.7	0.688175	0.397481	0.0833913
5-HT1B	0.61	0.08	0.28	0.52	0.2	0.64	0.49	0.27	0.19	0.21	0.43	0.06	0.27	0.64	0.49	0.07	1.26	0.62	0.05	0.06	0.27	0.21	0.24	0.61	0.72	0.42	0.72	0.35	1.49	1	0.67	0.4	0.16	0.67		5-HT1B	0.388333	0.275	0.558333	0.24	0.66		5-HT1B	0.15	0.705923	0.15	0.409763	0.568851	0.471319
5-HT2A	0.13	0.03	0.06	0.16	0.07	0.13	0.1	0.01	0.13	0.05	0.17	0.03	0.11	0.23	0.08	0.12	0.34	0.07	0.05	0.06	0.05	0.15	0.11	0.13	0.12	0.09	0.09	0.15	0.15	0.2	0.04	0.03	0	0.15		5-HT2A	0.0966667	0.0816667	0.158333	0.0916667	0.102		5-HT2A	0.18	0.661535	0.18	0.445889	0.557026	0.423432
5-HT2B	0.36	0.2	0.21	0.24	0.39	0.27	0.1	0.11	0.27	0.22	0.32	0.17	0.29	0.9	0.78	0.68	0.69	0.41	0.29	0.16	0.22	0.16	0.13	0.49	0.38	0.4	0.94	1.41	1.3	0.3	0.15	0.49	0.88	0.19		5-HT2B	0.278333	0.198333	0.625	0.241667	0.644		5-HT2B	3.35	0.0004421	3.35	1.10653	0.276967	6.46463e-05
5-HT7	0.46	0.2	0.18	0.33	0.34	0.49	0.18	0.19	0.78	0.22	0.28	0.06	0.3	0.58	0.19	0.33	0.53	0.31	0.13	0.36	0.24	0.21	0.26	0.24	0.35	0.2	0.5	0.85	0.43	0.33	0.17	0.26	0.75	0.23		5-HT7	0.333333	0.285	0.373333	0.24	0.407		5-HT7	0.02	0.965281	-0.02	-0.0477083	0.439027	0.913466
5.8SrRNA-Psi:CR45854	808.92	1193.06	1319.6	1235.86	838	898.23	754.86	1416.49	1456.12	839.09	833.85	813.37	2683.35	1255.28	1005.78	1873.95	1542.42	1135	961.42	746.92	782.54	1292.11	1629.11	1244.34	2027.98	1340.36	2316.09	2755.42	2933.63	1371.91	1502.38	1858.98	5169.41	1723.84		5.8SrRNA-Psi:CR45854	1048.94	1018.96	1582.63	1109.41	2300		5.8SrRNA-Psi:CR45854	0.04	0.90872	0.04	0.0955642	0.338394	0.777633
5.8SrRNA-Psi:CR45857	3.75	4.18	4.49	5.92	1.19	5.67	3.52	13.46	14.25	2.72	0.93	2.65	22.3	5.71	0	8.96	12.27	2.06	4.06	1.85	1.76	9.75	14.93	5.82	9.02	11.87	16.33	14.48	8.4	10.38	8.73	12.85	44.78	4.98		5.8SrRNA-Psi:CR45857	4.2	6.255	8.55	6.36167	14.182		5.8SrRNA-Psi:CR45857	0.01	0.981686	-0.01	-0.0478805	0.8159	0.953204
5.8SrRNA-Psi:CR45863	305.38	429.61	479.86	485.58	336.63	355.26	273.3	476.15	527.66	346.72	362.22	369.28	876.67	430.06	400.31	687.83	628.07	447.68	389.04	337.71	365.69	430.9	382.65	512.29	748.92	525.25	816.44	901.57	886.43	458.12	401.64	638.67	1087.88	592.41		5.8SrRNA-Psi:CR45863	398.72	392.555	578.437	403.047	705.733		5.8SrRNA-Psi:CR45863	0.01	0.986277	0.01	0.0125658	0.29053	0.965501
5.8SrRNA:CR40454	108.05	102.75	102.64	171.73	48.94	42.2	129.62	369.45	223.84	67.39	39.11	44.04	460.64	227.71	182.07	190.91	129.12	53.56	88.88	48.9	64.08	166.97	509.53	115.7	295.72	209.54	363.15	609.02	703.55	260.21	515.73	179.95	2315.37	381.65		5.8SrRNA:CR40454	96.0517	145.575	207.335	165.677	583.389		5.8SrRNA:CR40454	0.01	0.968736	-0.01	-0.0598512	0.629851	0.924296
5PtaseI	14.69	22.38	17.97	14.6	16.66	20.56	12.01	11.85	18.41	17.3	18.18	15.11	28.98	19.93	27.55	27.25	30.62	28.24	19.54	17.51	14.88	12.86	13.54	22.75	32.45	35.87	31.39	27.88	32.82	22.18	15.74	34.72	24.34	25.26		5PtaseI	17.81	15.4767	27.095	16.8467	28.265		5PtaseI	0.67	0.21467	0.67	0.258265	0.152629	0.090626
5SrRNA-Psi:CR33356	0	0	0	0	0	0	0	0.86	0	0	0	0	0	0	0	0	0	1.18	0	0.79	0	0	0	0	1.03	0	0	0	0	0	0	0	0	0		5SrRNA-Psi:CR33356	0	0.143333	0.196667	0.131667	0.103		5SrRNA-Psi:CR33356	0	NA	0	-0.0342504	1.34851	0.979737
5SrRNA-Psi:CR33363	0	1.59	0	0	0	0	0	0	0	0	0.8	0	0	0	0	0	0	0	0	1.58	0	0	5.1	1.24	0	3.58	0	1.24	0	0	0	0	0	0		5SrRNA-Psi:CR33363	0.265	0.133333	0	1.32	0.482		5SrRNA-Psi:CR33363	0	NA	0	-0.242331	1.34851	0.857387
5SrRNA-Psi:CR33371	0	0	0	0	0	0	0	0	0	0	0	0	0	0	0	0	0	0	0	0	0	0	0	0	0	0	0	0	0	0	0	0	0	0		5SrRNA-Psi:CR33371	0	0	0	0	0		5SrRNA-Psi:CR33371	0	NA	0	NA	NA	NA
5SrRNA-Psi:CR33416	0	0	0	0	0	0	0	0	0	0	0	0	0	0	0	0	0	0	0	0	0	0	0	0	0	0	0	0	0	0	0	0	0	0		5SrRNA-Psi:CR33416	0	0	0	0	0		5SrRNA-Psi:CR33416	0	NA	0	NA	NA	NA
5SrRNA:CR33353	0	4.24	0	0	0	0	0	0	0	0	0	0	0	0	1.14	0	0	0	0	2.52	0	0	0	0	0	0	0	0	0	0	0	0	0	0		5SrRNA:CR33353	0.706667	0	0.19	0.42	0		5SrRNA:CR33353	0	NA	0	0.17383	1.34851	0.897433
5SrRNA:CR33354	1.52	0.85	0	1.08	2.18	0	0	0	0.84	2.97	0	0	1.77	1.16	1.14	3.77	0	0	0	0	2.14	0	0	1.33	2.19	0	3.57	2.64	1.7	2.23	0	0	7.2	0		5SrRNA:CR33354	0.938333	0.635	1.30667	0.578333	1.953		5SrRNA:CR33354	0.05	0.890864	0.05	0.400158	1.20097	0.738987
5SrRNA:CR33355	0	0	0	1.08	2.18	0	0	0.91	0.84	0.99	0	0.97	3.53	2.31	0	0	0	2.5	1.85	0	2.14	0	0	0	0	0	4.76	2.64	1.7	0	0	0	2.4	1.3		5SrRNA:CR33355	0.543333	0.618333	1.39	0.665	1.28		5SrRNA:CR33355	0.07	0.855337	0.07	0.466831	1.11772	0.676194
5SrRNA:CR33357	0	0	0	0	0	0	0	0	0	0	0	0.97	0	0	0	0	0	0	0	0.84	0	0	0	0	0	0	0	0	0	0	1.06	0	0	0		5SrRNA:CR33357	0	0.161667	0	0.14	0.106		5SrRNA:CR33357	0	NA	0	-0.242331	1.34851	0.857387
5SrRNA:CR33358	0	0	0	0	0	0	0	0	0	0	0	0	0	0	0	0	0	0	0	0	0	0	0	0	0	0	0	0	0	0	0	0	0	0		5SrRNA:CR33358	0	0	0	0	0		5SrRNA:CR33358	0	NA	0	NA	NA	NA
5SrRNA:CR33359	0	0	0	0	0	0	0	5.45	4.19	1.98	0.85	0	3.53	1.16	1.14	0	0	0	0.93	1.68	0	0	0.91	2.65	2.19	2.55	3.57	5.28	0	1.11	1.06	0	16.8	6.49		5SrRNA:CR33359	0	2.07833	0.971667	1.02833	3.905		5SrRNA:CR33359	0.35	0.449914	-0.35	-1.32213	1.11798	0.236965
5SrRNA:CR33360	0	0	0	0	0	0	0	0	0	1.98	0	0	0	0	0	0	0	0	0	0.84	0	0	0	0	0	0	0	0	0	0	0	0	0	1.3		5SrRNA:CR33360	0	0.33	0	0.14	0.13		5SrRNA:CR33360	0	NA	0	-0.450411	1.34851	0.738376
5SrRNA:CR33361	1.52	0	0	0	2.18	0	0	0	2.51	0.99	0	0	1.77	0	0	3.77	2.13	1.25	2.78	0	1.07	0	0.91	1.33	0	0	1.19	0	0	1.11	1.06	1.46	2.4	0		5SrRNA:CR33361	0.616667	0.583333	1.48667	1.015	0.722		5SrRNA:CR33361	0.11	0.772604	0.11	0.700188	1.17977	0.55285
5SrRNA:CR33362	0	0.85	0	0	0	0	0	0	0	0	0	0	0	0	0	0	0	0	0	0.84	0	1.05	0	1.33	0	0	0	0	1.7	0	0	0	0	0		5SrRNA:CR33362	0.141667	0	0	0.536667	0.17		5SrRNA:CR33362	0	NA	0	NA	NA	NA
5SrRNA:CR33364	0	0	0	0	0	0	0	0	0	0	0	0	0	0	0	0	0	0	0	0	0	0	0	0	1.1	0	0	0	0	0	0	0	0	0		5SrRNA:CR33364	0	0	0	0	0.11		5SrRNA:CR33364	0	NA	0	NA	NA	NA
5SrRNA:CR33365	0	0	0	0	0	0	0	0	0	0	0	0	0	0	0	0	0	0	0	0	0	0	0	0	0	0	0	0	0	0	0	0	0	0		5SrRNA:CR33365	0	0	0	0	0		5SrRNA:CR33365	0	NA	0	NA	NA	NA
5SrRNA:CR33366	0	0	0	0	0	0	0	0	0	0	0	0	0	0	0	0	0	0	0	0	0	0	0.91	0	0	0	0	0	0	0	0	0	0	0		5SrRNA:CR33366	0	0	0	0.151667	0		5SrRNA:CR33366	0	NA	0	NA	NA	NA
5SrRNA:CR33367	0.76	0	0	0	0	0	0	0.91	0	0	1.7	0	0	0	0	0	0	0	0	0	0	0	0.91	0	1.1	0	0	0	1.7	0	0	0	0	0		5SrRNA:CR33367	0.126667	0.435	0	0.151667	0.28		5SrRNA:CR33367	0	NA	0	-0.66228	1.34856	0.623355
5SrRNA:CR33368	0.76	0	0	1.08	2.18	0	0	0.91	3.35	0	0	0.97	3.53	1.16	0	1.26	0	0	0	1.68	3.21	0	0	2.65	1.1	2.55	1.19	2.64	3.4	0	1.06	0	7.2	1.3		5SrRNA:CR33368	0.67	0.871667	0.991667	1.25667	2.044		5SrRNA:CR33368	0.03	0.939683	-0.03	-0.239396	1.21124	0.843323
5SrRNA:CR33369	0	0	0	0	0	0	0	0	0	0	0	0	0	0	0	0	0	1.25	0	0	0	0	0	0	0	0	0	0	0	0	0	0	0	0		5SrRNA:CR33369	0	0	0.208333	0	0		5SrRNA:CR33369	0	NA	0	0.17383	1.34851	0.897433
5SrRNA:CR33370	0.76	0	0	0	0	0	0	0	0	0	0	0	0	1.16	0	0	1.06	0	0	1.68	0	1.05	0	0	0	0	0	0	0	0	0	1.46	0	0		5SrRNA:CR33370	0.126667	0	0.37	0.455	0.146		5SrRNA:CR33370	0	NA	0	0.38191	1.34851	0.777017
5SrRNA:CR33372	0.76	0	0	1.08	2.18	1.15	0	0	0.84	0.99	0	0	5.3	0	0	1.26	0	0	0	0	0	0	0	0	1.1	1.27	0	1.32	0	0	0	1.46	16.8	1.3		5SrRNA:CR33372	0.861667	0.305	1.09333	0	2.325		5SrRNA:CR33372	0	NA	0	0.666673	1.352	0.621941
5SrRNA:CR33373	0.76	0	0	2.16	0	1.15	1.6	1.82	1.68	2.97	0.85	0	3.53	1.16	2.27	2.51	0	1.25	3.7	0.84	1.07	0	1.81	0	1.1	1.27	2.38	2.64	1.7	1.11	1.06	1.46	2.4	1.3		5SrRNA:CR33373	0.678333	1.48667	1.78667	1.23667	1.642		5SrRNA:CR33373	0.06	0.870212	-0.06	-0.317286	0.835883	0.704256
5SrRNA:CR33374	0	0	0	0	0	0	0	0	0	0	0	0	0	0	0	1.26	0	0	0	0	0	0	0	0	0	0	0	0	0	0	0	0	0	0		5SrRNA:CR33374	0	0	0.21	0	0		5SrRNA:CR33374	0	NA	0	0.17383	1.34851	0.897433
5SrRNA:CR33375	0	0	0	0	0	0	0	0	0	0	0	0	0	2.31	1.14	0	1.06	0	0	1.68	0	0	0	0	1.1	0	2.38	0	0	0	0	1.46	0	0		5SrRNA:CR33375	0	0	0.751667	0.28	0.494		5SrRNA:CR33375	0	NA	0	0.76647	1.3488	0.569858
5SrRNA:CR33376	0	0.85	0	0	0	0	0	0	0	0	0	0	0	0	0	0	0	0	0	0	0	0	0	0	0	0	0	0	0	0	0	0	0	0		5SrRNA:CR33376	0.141667	0	0	0	0		5SrRNA:CR33376	0	NA	0	NA	NA	NA
5SrRNA:CR33377	0	0.85	1.17	0	0	1.15	0.8	3.63	1.68	2.97	0	0.97	5.3	3.47	0	2.51	1.06	0	1.85	0	1.07	0	0.91	1.33	0	1.27	2.38	0	1.7	0	0	1.46	12	2.59		5SrRNA:CR33377	0.528333	1.675	2.05667	0.86	2.14		5SrRNA:CR33377	0.05	0.901065	-0.05	-0.286467	0.94597	0.76202
5SrRNA:CR33378	0	0	0	0	0	0	0	0	0	0	0	0	0	0	0	0	0	0	0	0	0	0	0	0	0	0	0	0	0	0	0	0	0	0		5SrRNA:CR33378	0	0	0	0	0		5SrRNA:CR33378	0	NA	0	NA	NA	NA
5SrRNA:CR33379	0	0	0	0	0	0	0	0	0	0	0	0	1.77	0	0	0	0	0	0	0	0	0	0	0	0	0	0	0	0	0	0	0	0	0		5SrRNA:CR33379	0	0	0.295	0	0		5SrRNA:CR33379	0	NA	0	0.17383	1.34851	0.897433
5SrRNA:CR33380	0	0	0	0	0	0	0	0	0	0	0	0	0	0	0	0	0	0	0	0	0	0	0	0	0	0	0	0	0	0	0	0	0	0		5SrRNA:CR33380	0	0	0	0	0		5SrRNA:CR33380	0	NA	0	NA	NA	NA
5SrRNA:CR33381	0	0	0	0	0	0	0	0	0	0	0	0	0	0	0	0	0	0	0	0	0	0	0	0	0	0	0	0	0	0	0	0	0	0		5SrRNA:CR33381	0	0	0	0	0		5SrRNA:CR33381	0	NA	0	NA	NA	NA
5SrRNA:CR33382	0	0	0	0	0	0	0	0	0	0	0	0	0	0	0	0	0	0	0	0	0	0	0	0	0	0	0	0	0	0	0	0	0	0		5SrRNA:CR33382	0	0	0	0	0		5SrRNA:CR33382	0	NA	0	NA	NA	NA
5SrRNA:CR33383	0	0	0	0	0	0	0	0	0	0	0.85	0	0	0	0	0	0	0	0	0	0	0	0	0	0	0	0	0	0	0	0	0	0	0		5SrRNA:CR33383	0	0.141667	0	0	0		5SrRNA:CR33383	0	NA	0	-0.242331	1.34851	0.857387
5SrRNA:CR33384	0	0	0	0	0	0	0	0	0	0	0	0	0	0	0	0	0	0	0	0	0	0	0	0	0	0	0	0	0	0	0	0	0	0		5SrRNA:CR33384	0	0	0	0	0		5SrRNA:CR33384	0	NA	0	NA	NA	NA
5SrRNA:CR33385	0	0.85	0	0	0	0	0	0	0.84	0	0	0	0	0	0	0	0	0	0	0	0	1.05	0	0	0	0	0	0	0	0	0	0	0	0		5SrRNA:CR33385	0.141667	0.14	0	0.175	0		5SrRNA:CR33385	0	NA	0	-0.242331	1.34851	0.857387
5SrRNA:CR33386	0	0	0	0	0	0	0	0	0	0	0	0	0	0	0	0	0	0	0	0	0	0	0	0	0	0	0	0	0	0	0	0	0	0		5SrRNA:CR33386	0	0	0	0	0		5SrRNA:CR33386	0	NA	0	NA	NA	NA
5SrRNA:CR33387	0	0	0	0	0	0	0	0	0	0	0	0	0	0	0	0	0	0	0	0	0	0	0	1.33	0	0	0	0	1.7	0	0	0	2.4	0		5SrRNA:CR33387	0	0	0	0.221667	0.41		5SrRNA:CR33387	0	NA	0	NA	NA	NA
5SrRNA:CR33388	0	0	0	0	0	0	0	0	0	0	0	0	0	0	0	0	0	0	0	0	0	0	0	0	0	0	0	0	0	0	0	0	0	0		5SrRNA:CR33388	0	0	0	0	0		5SrRNA:CR33388	0	NA	0	NA	NA	NA
5SrRNA:CR33389	0	0	0	0	0	0	0	0	0	0	0	0	0	0	0	0	0	0	0	0	0	0	0	0	0	0	0	0	0	0	0	0	0	0		5SrRNA:CR33389	0	0	0	0	0		5SrRNA:CR33389	0	NA	0	NA	NA	NA
5SrRNA:CR33390	0	0	0	0	0	0	0	0	0	0	0	0	0	0	0	0	0	0	0	0	0	0	0	1.33	0	0	0	1.32	0	0	0	0	0	0		5SrRNA:CR33390	0	0	0	0.221667	0.132		5SrRNA:CR33390	0	NA	0	NA	NA	NA
5SrRNA:CR33391	0	0	0	0	0	2.31	0	0	0	0	0	0.97	0	0	0	0	1.07	0	0	0	0	0	0	0	0	0	0	0	0	0	0	0	0	0		5SrRNA:CR33391	0.385	0.161667	0.178333	0	0		5SrRNA:CR33391	0	NA	0	-0.0342504	1.34851	0.979737
5SrRNA:CR33392	0	0.85	1.17	1.08	4.35	1.15	0.8	1.82	2.51	0	0.85	1.93	1.77	2.31	0	0	0	1.25	1.85	0	3.21	1.05	1.81	2.65	1.1	2.55	2.38	3.96	3.4	0	0	0	2.4	0		5SrRNA:CR33392	1.43333	1.31833	0.888333	1.76167	1.579		5SrRNA:CR33392	0.26	0.54734	-0.26	-1.00895	0.998004	0.312033
5SrRNA:CR33393	0	0	0	0	0	0	0	0	0	0	0	0	0	0	0	0	0	0	0	0	0	0	0	0	1.1	0	0	0	0	0	1.06	0	0	0		5SrRNA:CR33393	0	0	0	0	0.216		5SrRNA:CR33393	0	NA	0	NA	NA	NA
5SrRNA:CR33394	0.76	1.69	1.17	0	0	2.3	0	4.54	5.03	0.99	0	1.93	3.53	0	0	2.51	0	0	1.85	1.68	1.07	0	0	0	1.1	1.27	2.38	10.56	1.7	0	1.06	0	7.2	2.59		5SrRNA:CR33394	0.986667	2.08167	1.00667	0.766667	2.786		5SrRNA:CR33394	0.26	0.551907	-0.26	-1.19784	1.19429	0.315874
5SrRNA:CR33395	0.76	0.85	0	0	0	0	0	0	0	1.98	0	0	3.53	0	3.41	1.26	0	0	0.93	0.84	0	0	0	0	0	0	1.19	0	0	1.11	0	0	0	0		5SrRNA:CR33395	0.268333	0.33	1.36667	0.295	0.23		5SrRNA:CR33395	0	NA	0	0.881235	1.34028	0.51086
5SrRNA:CR33396	3.8	0	1.17	0	4.35	0	0	0.91	4.19	0	0.85	1.93	1.77	2.31	0	3.77	1.06	0	1.85	0	3.21	2.09	0.91	0	0	5.09	1.19	2.64	1.7	1.11	1.06	0	2.4	2.59		5SrRNA:CR33396	1.55333	1.31333	1.485	1.34333	1.778		5SrRNA:CR33396	0.04	0.911498	-0.04	-0.278558	1.01362	0.783459
5SrRNA:CR33397	0	0	0	0	0	0	0	0	0	0	0	0	0	0	0	0	0	0	0	0	0	0	0	0	0	0	2.38	0	0	1.11	0	0	0	0		5SrRNA:CR33397	0	0	0	0	0.349		5SrRNA:CR33397	0	NA	0	NA	NA	NA
5SrRNA:CR33398	0	0	0	0	0	0	0	0	0	0	0	0	0	0	0	0	0	0	0	0	0	0	0	0	0	0	0	0	0	0	0	0	0	0		5SrRNA:CR33398	0	0	0	0	0		5SrRNA:CR33398	0	NA	0	NA	NA	NA
5SrRNA:CR33399	0	0	0	0	0	0	0	0	1.68	0	0	0.97	0	0	0	0	0	1.25	0.93	0	0	2.09	0	1.33	0	0	0	1.32	0	1.11	0	2.93	2.4	2.59		5SrRNA:CR33399	0	0.441667	0.208333	0.725	1.035		5SrRNA:CR33399	0	NA	0	-0.424329	1.34862	0.753036
5SrRNA:CR33400	0	0	0	0	0	0	0	0	0	0	0	0	0	0	0	0	0	0	0	0	0	0	0	0	0	0	0	0	0	0	0	0	0	0		5SrRNA:CR33400	0	0	0	0	0		5SrRNA:CR33400	0	NA	0	NA	NA	NA
5SrRNA:CR33401	0	0	0	0	0	0	0	0	0.84	0	0	0	0	0	0	0	0	0	0	0	0	0	0	0	1.1	0	1.19	0	0	0	0	0	0	0		5SrRNA:CR33401	0	0.14	0	0	0.229		5SrRNA:CR33401	0	NA	0	-0.242331	1.34851	0.857387
5SrRNA:CR33402	0.76	0.85	0	0	0	0	0	0	0	0	0	0	0	0	0	0	0	0	0	0	0	0	0	0	0	0	0	0	0	0	0	0	0	0		5SrRNA:CR33402	0.268333	0	0	0	0		5SrRNA:CR33402	0	NA	0	NA	NA	NA
5SrRNA:CR33403	0	0.85	0	2.16	0	0	0	0.91	0.84	0	0	0	5.3	2.31	0	1.26	0	0	5.55	0.84	1.07	3.14	0.91	0	0	0	1.19	1.32	1.7	1.11	2.12	1.46	7.2	2.59		5SrRNA:CR33403	0.501667	0.291667	1.47833	1.91833	1.869		5SrRNA:CR33403	0.22	0.603978	0.22	1.15786	1.28003	0.365703
5SrRNA:CR33404	0	0	0	1.08	0	0	0	0	0.84	0	0	0	0	0	0	2.51	0	0	0	0	0	0	0	0	0	0	0	0	0	0	0	0	0	0		5SrRNA:CR33404	0.18	0.14	0.418333	0	0		5SrRNA:CR33404	0	NA	0	0.17383	1.34851	0.897433
5SrRNA:CR33405	0	0	0	0	0	0	0	0	0	0	0	0	0	0	0	0	0	0	0	0	0	0	0	0	0	0	0	0	0	0	0	0	0	0		5SrRNA:CR33405	0	0	0	0	0		5SrRNA:CR33405	0	NA	0	NA	NA	NA
5SrRNA:CR33406	0	0	0	0	0	0	0	0	0	0	0	0	0	0	0	0	0	0	0	0	0	0	0	0	0	0	0	0	0	0	0	0	0	0		5SrRNA:CR33406	0	0	0	0	0		5SrRNA:CR33406	0	NA	0	NA	NA	NA
5SrRNA:CR33407	0	0	0	0	0	1.15	0.8	0	0.84	0	0	0	3.53	1.16	0	0	2.13	0	0	0.84	1.07	0	1.81	0	0	1.27	0	1.32	1.7	0	2.12	1.46	0	0		5SrRNA:CR33407	0.191667	0.273333	1.13667	0.62	0.787		5SrRNA:CR33407	0	NA	0	0.875663	1.27319	0.491596
5SrRNA:CR33408	0	0	0	0	0	0	0	0	0	0	0	0	0	0	0	0	0	0	0	0	0	0	0	0	0	0	0	0	0	0	0	0	0	0		5SrRNA:CR33408	0	0	0	0	0		5SrRNA:CR33408	0	NA	0	NA	NA	NA
5SrRNA:CR33409	0	0	0	0	0	0	0	0	0	0	0	0	0	0	0	0	0	0	0	0	0	0	0	0	0	0	0	0	0	0	0	0	0	0		5SrRNA:CR33409	0	0	0	0	0		5SrRNA:CR33409	0	NA	0	NA	NA	NA
5SrRNA:CR33410	0	0	0	0	0	0	0	0	0.84	0	0	0	0	0	0	0	0	0	0	0	0	0	0.91	0	0	0	0	0	0	0	0	0	0	0		5SrRNA:CR33410	0	0.14	0	0.151667	0		5SrRNA:CR33410	0	NA	0	-0.242331	1.34851	0.857387
5SrRNA:CR33411	0	0	0	0	0	0	0	0	0	0	0	0	0	0	1.14	0	0	0	0	0	0	0	0	0	0	0	0	0	0	0	0	0	0	0		5SrRNA:CR33411	0	0	0.19	0	0		5SrRNA:CR33411	0	NA	0	0.17383	1.34851	0.897433
5SrRNA:CR33412	0.76	0.85	1.17	2.16	0	0	0	0.91	1.68	0.99	0	0	3.53	0	0	1.26	3.19	0	0.93	0	0	0	0.91	0	2.19	2.55	3.57	3.96	1.7	0	0	1.46	4.8	0		5SrRNA:CR33412	0.823333	0.596667	1.33	0.306667	2.023		5SrRNA:CR33412	0.07	0.854055	0.07	0.500858	1.19042	0.673944
5SrRNA:CR33413	1.52	0	4.68	1.08	2.18	0	0	4.54	5.03	0	0.85	1.93	5.3	1.16	0	1.26	1.06	0	0	1.68	5.36	1.05	0	2.65	0	1.27	4.76	1.32	0	0	1.06	1.46	0	1.3		5SrRNA:CR33413	1.57667	2.05833	1.46333	1.79	1.117		5SrRNA:CR33413	0.18	0.653659	-0.18	-0.86245	1.0586	0.415238
5SrRNA:CR33414	0.76	0.85	1.17	0	0	0	0.8	0.91	2.51	0.99	0	0.97	5.3	1.16	0	2.51	0	1.25	0.93	0	1.07	0	0	3.98	0	0	2.38	3.96	0	0	3.18	2.93	2.4	0		5SrRNA:CR33414	0.463333	1.03	1.70333	0.996667	1.485		5SrRNA:CR33414	0.02	0.962978	0.02	0.117312	0.980557	0.90477
5SrRNA:CR33415	0	0	0	0	0	0	0	0	0	0	0	0	0	0	0	0	0	0	0	0	0	0	0	0	0	0	0	0	0	0	0	0	0	0		5SrRNA:CR33415	0	0	0	0	0		5SrRNA:CR33415	0	NA	0	NA	NA	NA
5SrRNA:CR33417	0	0	0	0	0	0	0	0	0	0	0	0	0	0	0	0	0	0	0	0	0	0	0	0	0	0	0	0	0	0	0	0	0	0		5SrRNA:CR33417	0	0	0	0	0		5SrRNA:CR33417	0	NA	0	NA	NA	NA
5SrRNA:CR33418	0	0	0	0	0	0	0	0	0	0	0	0	0	0	0	0	0	0	0	0	0	0	0	0	0	0	0	0	0	0	0	0	0	0		5SrRNA:CR33418	0	0	0	0	0		5SrRNA:CR33418	0	NA	0	NA	NA	NA
5SrRNA:CR33419	0	0	0	0	0	1.15	0.8	0	0	0	0	0	0	0	0	0	0	0	0	0	0	0	0	0	0	0	0	0	0	0	0	0	2.4	0		5SrRNA:CR33419	0.191667	0.133333	0	0	0.24		5SrRNA:CR33419	0	NA	0	-0.242331	1.34851	0.857387
5SrRNA:CR33420	0	0.85	0	0	0	0	0	0	0	0	0	0	0	0	0	0	0	0	0	0	0	0	0	0	0	0	0	0	0	0	0	0	0	0		5SrRNA:CR33420	0.141667	0	0	0	0		5SrRNA:CR33420	0	NA	0	NA	NA	NA
5SrRNA:CR33421	0	0	0	0	0	0	0	0	1.68	0	0	0	0	0	0	0	0	0	0	0	0	0	0	0	0	0	1.19	0	0	0	0	0	0	0		5SrRNA:CR33421	0	0.28	0	0	0.119		5SrRNA:CR33421	0	NA	0	-0.450411	1.34851	0.738376
5SrRNA:CR33422	0	0	0	0	0	0	0	0	0	0	0	0	0	0	0	0	0	0	0.93	0	0	0	0	0	0	0	0	0	0	0	0	0	0	0		5SrRNA:CR33422	0	0	0	0.155	0		5SrRNA:CR33422	0	NA	0	NA	NA	NA
5SrRNA:CR33423	0	0.85	0	0	2.18	0	0	0	2.51	0	0	0	1.77	0	0	0	0	0	0	0	0	0	0	0	0	0	0	0	0	0	0	0	0	0		5SrRNA:CR33423	0.505	0.418333	0.295	0	0		5SrRNA:CR33423	0	NA	0	-0.41232	1.34861	0.759805
5SrRNA:CR33424	0	0	0	0	0	0	0	0	0	0	0	0	0	0	0	0	0	0	0	0	0	1.05	0	0	0	0	0	0	0	0	1.06	0	2.4	0		5SrRNA:CR33424	0	0	0	0.175	0.346		5SrRNA:CR33424	0	NA	0	NA	NA	NA
5SrRNA:CR33425	0	0	0	0	0	0	0	0	0	0	0	0	3.53	0	0	0	0	0	0	0.84	0	1.05	0	0	1.1	0	0	0	0	0	0	0	0	0		5SrRNA:CR33425	0	0	0.588333	0.315	0.11		5SrRNA:CR33425	0	NA	0	0.38191	1.34851	0.777017
5SrRNA:CR33426	0	0	0	0	0	1.15	0	0	0	0	0.85	0	0	0	0	0	0	0	0	0	0	0	0	0	0	0	0	0	0	0	0	0	0	0		5SrRNA:CR33426	0.191667	0.141667	0	0	0		5SrRNA:CR33426	0	NA	0	-0.242331	1.34851	0.857387
5SrRNA:CR33427	0	0	0	0	0	1.15	0	0	0	0	0	0	0	0	0	0	0	0	0	0	0	0	0	0	0	0	1.19	0	0	0	0	0	0	0		5SrRNA:CR33427	0.191667	0	0	0	0.119		5SrRNA:CR33427	0	NA	0	NA	NA	NA
5SrRNA:CR33428	0	0	0	0	0	0	0	0	0	0	0	0	0	0	0	0	0	0	0	0	0	0	0	0	0	0	0	0	0	0	0	0	0	0		5SrRNA:CR33428	0	0	0	0	0		5SrRNA:CR33428	0	NA	0	NA	NA	NA
5SrRNA:CR33429	0	0	0	0	0	0	0	0	0.84	0	0	0	1.77	1.16	0	0	0	0	0	0	0	0	0	0	2.19	0	0	0	1.7	0	0	0	0	0		5SrRNA:CR33429	0	0.14	0.488333	0	0.389		5SrRNA:CR33429	0	NA	0	0.17383	1.34851	0.897433
5SrRNA:CR33430	0	0	0	0	0	0	0	0	0	0	0	0	0	0	0	0	0	0	0	0	0	0	0	0	0	0	0	0	0	0	0	0	0	0		5SrRNA:CR33430	0	0	0	0	0		5SrRNA:CR33430	0	NA	0	NA	NA	NA
5SrRNA:CR33431	0	0	0	0	0	0	0	0	0	0	0	0	0	0	0	0	0	0	0	0	0	0	0	0	0	0	0	0	0	0	0	0	0	0		5SrRNA:CR33431	0	0	0	0	0		5SrRNA:CR33431	0	NA	0	NA	NA	NA
5SrRNA:CR33432	0	0	0	1.08	0	0	0	0	0	0	0	0	0	0	0	0	0	0	0	0	0	0	0	0	0	0	0	0	0	0	0	0	0	0		5SrRNA:CR33432	0.18	0	0	0	0		5SrRNA:CR33432	0	NA	0	NA	NA	NA
5SrRNA:CR33433	0	0	0	0	0	0	0	0	0	0	0	0	0	0	0	0	0	0	0	0	0	0	0	0	0	0	0	0	0	0	0	0	0	0		5SrRNA:CR33433	0	0	0	0	0		5SrRNA:CR33433	0	NA	0	NA	NA	NA
5SrRNA:CR33434	0	0	0	0	0	0	0	0	0	0	0	0	0	0	0	0	0	0	0	0	0	0	0	0	0	0	0	0	0	0	0	0	0	0		5SrRNA:CR33434	0	0	0	0	0		5SrRNA:CR33434	0	NA	0	NA	NA	NA
5SrRNA:CR33435	0	0	0	0	0	0	0	0	0	0	0	0	0	0	0	0	0	0	0	0	0	0	0	0	0	0	0	0	0	0	0	0	0	0		5SrRNA:CR33435	0	0	0	0	0		5SrRNA:CR33435	0	NA	0	NA	NA	NA
5SrRNA:CR33436	0	0	0	0	0	0	0	0	0	0	0	0	0	0	0	0	0	0	0	0	0	0	0	0	0	0	0	0	0	0	0	0	0	0		5SrRNA:CR33436	0	0	0	0	0		5SrRNA:CR33436	0	NA	0	NA	NA	NA
5SrRNA:CR33437	0	0	0	0	0	0	0	0	0	0	0	0	0	0	0	0	0	0	0	0	0	0	0	0	0	0	0	0	0	0	0	0	0	0		5SrRNA:CR33437	0	0	0	0	0		5SrRNA:CR33437	0	NA	0	NA	NA	NA
5SrRNA:CR33438	0	0	0	0	0	0	0	0	0	0	0	0	0	0	0	0	0	0	0	0	0	0	0	0	0	0	0	0	0	0	0	0	0	0		5SrRNA:CR33438	0	0	0	0	0		5SrRNA:CR33438	0	NA	0	NA	NA	NA
5SrRNA:CR33439	0	0	0	0	0	0	0	0.91	0	0	0	0	0	0	0	0	0	0	0	0	0	0	0	0	2.19	0	0	0	0	0	0	0	0	0		5SrRNA:CR33439	0	0.151667	0	0	0.219		5SrRNA:CR33439	0	NA	0	-0.242331	1.34851	0.857387
5SrRNA:CR33440	0	0	0	0	0	0	0	0	0	0	0	0	0	0	0	1.26	0	0	0	0	1.07	0	0	1.33	1.1	0	0	0	0	0	0	0	0	0		5SrRNA:CR33440	0	0	0.21	0.4	0.11		5SrRNA:CR33440	0	NA	0	0.17383	1.34851	0.897433
5SrRNA:CR33441	0	0	0	0	0	0	0	0	0	0	0	0	0	0	2.27	0	0	0	0	0	0	0	0	0	0	0	0	0	0	0	0	0	0	0		5SrRNA:CR33441	0	0	0.378333	0	0		5SrRNA:CR33441	0	NA	0	0.38191	1.34851	0.777017
5SrRNA:CR33442	0	0	0	0	0	0	0	0	0	0.99	0	0	0	0	0	0	0	0	1.85	0	0	0	0	0	0	0	0	0	0	0	0	0	0	0		5SrRNA:CR33442	0	0.165	0	0.308333	0		5SrRNA:CR33442	0	NA	0	-0.242331	1.34851	0.857387
5SrRNA:CR33443	0	0	0	0	0	0	0	0	0	0	0	0	0	0	0	0	0	0	0	0	0	0	0	0	0	0	0	0	1.7	0	0	0	0	0		5SrRNA:CR33443	0	0	0	0	0.17		5SrRNA:CR33443	0	NA	0	NA	NA	NA
5SrRNA:CR33444	0	0	0	0	0	0	0	0	0	0	0	0	0	0	0	0	0	0	0	0	0	0	0	0	0	0	0	0	0	0	0	0	0	0		5SrRNA:CR33444	0	0	0	0	0		5SrRNA:CR33444	0	NA	0	NA	NA	NA
5SrRNA:CR33445	0	0	0	1.08	0	1.15	0	0	0	0	0	0	0	0	0	0	0	0	0	0	0	0	0	0	0	0	1.19	0	0	0	0	0	0	0		5SrRNA:CR33445	0.371667	0	0	0	0.119		5SrRNA:CR33445	0	NA	0	NA	NA	NA
5SrRNA:CR33446	0	0	0	0	0	0	0	0	0	0.99	0	0	0	0	0	0	0	0	0.93	0.84	0	0	0	0	0	0	0	0	1.7	0	0	0	0	0		5SrRNA:CR33446	0	0.165	0	0.295	0.17		5SrRNA:CR33446	0	NA	0	-0.242331	1.34851	0.857387
5SrRNA:CR33447	0	0	0	0	0	0	0	0	0	0	0	0	0	0	0	0	0	0	0	0	0	0	0	0	0	0	0	0	0	0	0	0	0	0		5SrRNA:CR33447	0	0	0	0	0		5SrRNA:CR33447	0	NA	0	NA	NA	NA
5SrRNA:CR33448	0	0	0	0	0	0	0	0	0	0	0	0	0	0	0	0	0	0	0	0	0	0	0	0	0	0	0	0	0	0	0	0	0	0		5SrRNA:CR33448	0	0	0	0	0		5SrRNA:CR33448	0	NA	0	NA	NA	NA
5SrRNA:CR33449	0	0	0	0	0	0	0.8	0	0	0	0	0	0	0	0	0	0	0	0	0	0	0	0	0	0	0	0	0	0	0	0	0	0	0		5SrRNA:CR33449	0	0.133333	0	0	0		5SrRNA:CR33449	0	NA	0	-0.242331	1.34851	0.857387
5SrRNA:CR33450	0	0	0	0	0	0	0.8	0	0	0	0	0	0	0	0	0	0	0	0	0	0	0	0	0	0	0	0	0	0	0	0	0	0	0		5SrRNA:CR33450	0	0.133333	0	0	0		5SrRNA:CR33450	0	NA	0	-0.242331	1.34851	0.857387
5SrRNA:CR33451	0	0	0	0	0	0	0	0	0	0	0	0	0	0	0	0	0	0	0	0	0	0	0	0	0	0	0	0	0	0	0	0	0	0		5SrRNA:CR33451	0	0	0	0	0		5SrRNA:CR33451	0	NA	0	NA	NA	NA
5SrRNA:CR33452	0	0	0	0	0	0	0	0	0	0	0	0	0	0	0	0	0	0	0	0	0	0	0	0	0	0	0	0	0	0	0	0	0	0		5SrRNA:CR33452	0	0	0	0	0		5SrRNA:CR33452	0	NA	0	NA	NA	NA
7B2	2.23	1.43	0.92	4.75	7.86	11.27	6.78	6.05	0.95	6.15	2.97	0.22	0.2	0.78	0.9	0.43	1.44	2.82	0.1	4.08	5.56	7.43	5.42	5.39	2.6	2.3	0	0	0.77	1.26	1.08	0	0	1.46		7B2	4.74333	3.85333	1.095	4.66333	0.947		7B2	2.14	0.00727628	-2.14	-2.29259	0.726545	0.00160239
7SLRNA:CR32864	13.39	32.13	11.08	10.23	9.82	16.58	10.85	21.33	38.19	30.85	11.87	15.28	26.33	15.66	18.47	17.01	14.9	15.25	19.64	14.42	15	9.91	13.51	13.17	24.23	10.92	18.81	34.56	29.17	14.07	16.76	29.74	23.84	11.13		7SLRNA:CR32864	15.5383	21.395	17.9367	14.275	21.323		7SLRNA:CR32864	1.09	0.0814294	-1.09	-0.769696	0.349108	0.0274714
7SLRNA:CR42652	13.04	27.16	11.08	16.56	16.7	8.81	9.04	15.18	40.46	23.7	12.26	12.66	30.32	19.83	20.01	27.78	11.06	11.86	21.73	11.77	13.06	5.66	8.6	8.38	17.8	7.47	18.81	34.56	24.57	8.54	15.33	27.1	16.25	13.47		7SLRNA:CR42652	15.5583	18.8833	20.1433	11.5333	18.39		7SLRNA:CR42652	0.26	0.555526	-0.26	-0.389387	0.390811	0.319077
14-3-3epsilon	160.06	236.14	222.55	165.42	311.49	287.46	224.75	157.9	224.49	235.99	246.39	193.98	395.65	419.86	635.37	538.25	434.22	497.74	261.42	173.79	174.86	190.53	164.78	380.36	387.72	456.66	561.74	529.67	603.62	260.52	316.22	638.07	345	436.18		14-3-3epsilon	230.52	213.917	486.848	224.29	453.54		14-3-3epsilon	4.84	1.43503e-05	4.84	0.608653	0.125824	1.31587e-06
14-3-3zeta	750.24	773.81	638.52	812.95	554.9	693.74	550.06	483.2	402.35	637.07	572.64	585.23	579.21	502.12	647.14	567.32	501.73	510.4	572.58	478.96	451.52	545.47	524.55	546.61	541.85	462.93	553.9	448.53	462.84	457.84	525.49	592.07	406.72	505.03		14-3-3zeta	704.027	538.425	551.32	519.948	495.72		14-3-3zeta	1.7	0.0198128	-1.7	-0.559304	0.20003	0.0051723
18SrRNA-Psi:CR41602	2398.32	4811.43	3757.56	3745.17	2525.91	1769.22	1401.21	10769.7	9303.05	3788.16	1443.63	2355.2	25565.6	6663.96	3696	11797.8	5539.15	1771.64	4575.93	2688.57	4271.72	4795.88	7511.23	5883.89	9734.11	7651.05	13970.4	18225.7	21149.6	7982.86	6372.78	8645.04	46770.7	7352.33		18SrRNA-Psi:CR41602	3167.93	4843.5	9172.36	4954.54	14785.5		18SrRNA-Psi:CR41602	0.11	0.769273	0.11	0.402371	0.671453	0.549003
18SrRNA-Psi:CR45861	1360.19	2700.26	2125.95	2196.78	1429.04	975.03	779.45	6261.26	5345.74	2190.1	813.24	1339.7	15030.6	3838.02	2075.15	6828.98	3116.41	971.94	2739.84	1491.59	2451.59	2793.17	4592.75	3271.95	5594.44	4098.4	8338.08	11176.9	12918.9	4665.41	3840.71	5047.45	26465.6	4506		18SrRNA-Psi:CR45861	1797.88	2788.25	5310.18	2890.15	8665.19		18SrRNA-Psi:CR45861	0.11	0.767748	0.11	0.410415	0.680528	0.546454
18w	0.3	0.59	0.79	1.13	3.25	1.37	0.82	0.93	0.38	1.53	1.42	0.63	0	0.46	0.06	0.19	0.05	0.28	0.46	0.61	1.09	1.3	0.86	1.75	0.16	0.29	0.03	0.82	0.3	0.67	0.37	0.11	0	0.39		18w	1.23833	0.951667	0.173333	1.01167	0.314		18w	4.78	1.65548e-05	-4.78	-2.90138	0.603813	1.5467e-06
26-29-p	57.08	74.07	57.84	45.05	67.24	62.75	52.17	68.95	97.03	73.04	57.09	74.54	33.93	146.24	122.27	122.4	78.89	74.97	90.14	71.85	69.44	37.38	54.17	37.55	44.91	153.47	100.76	82.72	106.97	37.93	45.02	63.91	35.57	54.25		26-29-p	60.6717	70.47	96.45	60.0883	72.551		26-29-p	0.11	0.782715	-0.11	-0.162524	0.283003	0.565775
28SrRNA-Psi:CR40741	29.29	45.1	33.87	52.22	20.78	13.67	20.79	109.88	71.19	36.03	15.93	23.45	299.63	77.27	39.38	138.55	50.61	18.26	40.62	21.65	35.53	41.4	63.73	46.82	95.32	57.91	133.22	164.12	230.27	75.13	58.39	71.64	331.2	77.97		28SrRNA-Psi:CR40741	32.4883	46.2117	103.95	41.625	129.517		28SrRNA-Psi:CR40741	0.22	0.603006	0.22	0.60882	0.671433	0.364541
28SrRNA-Psi:CR41609	21.21	23	22.57	30.76	7.55	7.79	12.8	31.38	35.75	25.84	6.91	12.69	107.42	29.46	14.05	41.3	30.19	10.19	20.66	10.52	18.75	23.66	35.29	24	34.53	28.8	80.25	87.58	119.26	32.91	36	50.79	111.86	42.27		28SrRNA-Psi:CR41609	18.8133	20.895	38.7683	22.1467	62.425		28SrRNA-Psi:CR41609	0.14	0.727724	0.14	0.401479	0.591091	0.497
28SrRNA-Psi:CR45853	4.02	9.42	3.71	10.28	2.3	1.82	1.7	9.62	11.97	3.15	2.25	2.56	43.97	12.85	3.01	17.29	9.02	1.32	6.37	2.67	9.07	5.54	11.04	7.02	9.86	7.41	22.68	29.34	38.71	14.73	7.3	8.53	71.15	11.68		28SrRNA-Psi:CR45853	5.25833	5.20833	14.5767	6.95167	22.139		28SrRNA-Psi:CR45853	0.39	0.403204	0.39	0.952041	0.75095	0.204876
28SrRNA-Psi:CR45855	81.2	180.18	125.31	154.98	62.57	52.16	40.38	457.68	394.14	97.8	43.76	53.21	984.07	272.4	135.09	313.32	164.55	44.87	114.65	79.48	134.36	184.65	256.99	194.01	415.44	369.03	376.13	558.47	639.39	455.48	323	327.6	1506.29	259.26		28SrRNA-Psi:CR45855	109.4	181.162	319.05	160.69	523.009		28SrRNA-Psi:CR45855	0.07	0.851342	0.07	0.318897	0.746908	0.669412
28SrRNA-Psi:CR45859	202.7	374.18	279.12	287.28	185.87	145.91	160.75	531.89	485.41	242.32	218.54	195.22	1363.77	451.52	282.54	625.84	418.67	166.59	346.01	201.45	279.8	343.55	436.1	421	679.92	390.42	824.47	1019.7	1468.32	520.36	458.82	573.62	1535.5	560.59		28SrRNA-Psi:CR45859	245.843	305.688	551.488	337.985	803.172		28SrRNA-Psi:CR45859	0.13	0.740585	0.13	0.342687	0.522784	0.512144
28SrRNA-Psi:CR45860	40.82	72.73	49.07	75.08	32.9	24.31	21.19	233.97	122.57	47.56	22.14	29.61	528.58	135.5	78.2	284	77.3	23.18	48.65	34.97	45.78	60.1	97.38	53.65	167.74	95.3	223.69	262.47	385.14	145.63	75.81	103.52	704.25	146.7		28SrRNA-Psi:CR45860	49.1517	79.5067	187.793	56.755	231.025		28SrRNA-Psi:CR45860	0.2	0.633923	0.2	0.632437	0.745417	0.396197
28SrRNA-Psi:CR45862	898.58	1746.82	1751.15	1465.39	783.53	568.55	864.2	4030.29	4787.78	1637.65	781.78	902.03	10528.2	3692.04	1552.02	4561.15	2983.38	782.35	2806.48	1438.75	2738.65	3181.91	4104.53	3248.15	5330.74	2905.14	7558.3	8709.69	12475.7	4641.16	3572.47	4876.17	17380.1	4420.89		28SrRNA-Psi:CR45862	1202.34	2167.29	4016.53	2919.75	7187.04		28SrRNA-Psi:CR45862	0.13	0.746576	0.13	0.407112	0.631377	0.519057
128up	54.81	62.56	55.04	56.34	52.53	53.94	53.28	37.57	51.15	39.4	47.24	37.63	50.66	36.85	49.06	53.46	43.19	49.13	47.19	31.33	28.39	42.6	36.94	32.83	58.14	52.96	42.39	43.68	51.26	37.9	45.52	47.56	37.11	51.51		128up	55.87	44.3783	47.0583	36.5467	46.803		128up	1.94	0.0113724	-1.94	-0.480152	0.159921	0.00267831
140up	23.4	27.93	29.15	20.97	28.29	23.93	25.54	17.12	32.96	26.24	28.63	22.08	86.32	112.13	139.78	131.56	149.22	179.94	26.28	29.76	27.24	23.78	26.54	86.6	116.92	194.45	180.21	165.8	161.14	61.47	79.45	175.53	103.91	132.44		140up	25.6117	25.4283	133.158	36.7	137.132		140up	33.85	1.42609e-34	33.85	1.81882	0.143256	6.20167e-37
825-Oak	2.51	1.8	1.38	0	0.51	14.6	0	0	1.78	0	1226.67	36.22	2.08	1.09	0.27	0.59	1	0.88	0	3.96	0.5	9.61	1.07	0.62	0.77	0	0	1.24	0.4	1.05	2.75	0	0.57	0		825-Oak	3.46667	210.778	0.985	2.62667	0.678		825-Oak	0	NA	0	-4.55114	1.29374	NA
a	0.37	0.34	0.47	0.46	0.83	0.56	0.33	0.23	1.09	0.5	0.77	0.48	0.61	1.07	1.27	1.23	1.31	1.03	0.56	0.48	0.6	0.45	0.32	0.75	0.67	0.96	1.27	1.82	1.6	0.47	0.49	1.07	0.79	0.63		a	0.505	0.566667	1.08667	0.526667	0.977		a	0.65	0.221857	0.65	0.425624	0.254684	0.0946852
a5	0	0	0	0	0	0	0	0	0	0	0	0	0	0	0	0	0	0	0	0	0	0	0	0	0.53	0	0	0	0	0	0	0	0	0		a5	0	0	0	0	0.053		a5	0	NA	0	NA	NA	NA
a6	0.95	2.09	0.62	0.64	2.97	1.53	0.52	2.4	1.79	2.17	1.23	0.57	0.21	1.47	2.63	2.2	2.24	2.49	1.73	1.07	1.46	1.09	0.75	1.77	1.85	2.79	3	1.41	3.48	1.72	2.08	1.91	2.71	1.92		a6	1.46667	1.44667	1.87333	1.31167	2.287		a6	0.08	0.833499	-0.08	-0.232577	0.502342	0.643375
a10	0	0	0.25	0.24	0	0.5	1.75	0	0	0	0.37	0	0	0	0	0	0.46	0	0	0.18	0	0.91	0.79	0.58	0	0.56	0	0	0	1.7	0	0	0	0		a10	0.165	0.353333	0.0766667	0.41	0.226		a10	0.2	0.629583	-0.2	-1.16011	1.35603	0.392262
A16	13.46	16.39	15.62	10.23	21.46	16.05	10.08	12.56	23.81	17.69	15.35	14.34	16.2	22	20.74	26.14	21.09	28.67	15.31	15.54	13.07	8.53	11.9	10.3	19.14	23.92	20.62	26.85	14.13	16.17	15.32	19.9	16.78	11.39		A16	15.535	15.6383	22.4733	12.4417	18.422		A16	0.02	0.945259	-0.02	-0.0293003	0.161732	0.856237
Aac11	56.61	61.63	69.29	45.7	98.05	81.88	51.48	42.19	90.51	71.76	70.71	50.68	64.43	109.13	113.97	98.13	98.87	103.15	74.33	55.62	57.77	50.97	44.94	79.01	75.35	74.57	94.88	86.77	102.47	48.2	51.47	92.34	55.61	62.84		Aac11	68.86	62.8883	97.9467	60.44	74.45		Aac11	0.2	0.638119	0.2	0.0898022	0.106856	0.400683
AANATL2	12.24	4.45	1.31	6.12	6.55	9.08	3.08	8.65	1.17	7.07	2.97	7.31	2.23	13.19	3.42	4.05	5.14	3.33	0.84	8.54	4.8	3.88	4.44	3.44	1.46	8.64	4.25	3.42	4.64	4.6	2.3	3.49	0	5.63		AANATL2	6.625	5.04167	5.22667	4.32333	3.843		AANATL2	0.31	0.493862	-0.31	-0.627177	0.567664	0.26923
Aatf	7.7	12.67	14.31	12.38	15.14	12.91	13.26	7.09	13.84	9.28	14.37	6.95	14.6	14.15	17.51	16.47	15.88	14.55	10.9	8.74	7.5	11.96	7.25	8.11	13.66	16.94	14.47	27.45	15.67	12.39	9.49	16.18	17.9	12.41		Aatf	12.5183	10.7983	15.5267	9.07667	15.656		Aatf	0.02	0.957312	-0.02	-0.0231276	0.161344	0.886019
aay	50.07	43.72	28.44	41.92	54.74	62.53	40.97	58.56	74.43	37.55	37.64	28.77	41.89	71.54	100.07	98.3	81.97	53.97	24.76	117.95	42.94	51.88	60.6	31.96	29.4	58.83	60	55.81	89.85	36.07	23.37	39.03	13.88	41.58		aay	46.9033	46.32	74.6233	55.015	44.782		aay	0.06	0.875514	0.06	0.0935734	0.254573	0.713194
ab	1.9	1.18	2.78	2.63	3.44	2.7	1.83	1.04	1.53	2.44	2.08	1.39	1.12	1.32	0.71	0.86	1.17	1.22	1.98	1	1.86	2.13	1.56	2.85	1.14	0.56	0.78	1.37	1.15	1.35	1.48	1.21	1.14	1.08		ab	2.43833	1.71833	1.06667	1.89667	1.126		ab	5.56	2.72432e-06	-5.56	-1.22782	0.236248	2.0233e-07
ABCB7	13.09	9.2	8.13	9.53	9.22	11.82	8.29	4.66	8.65	7.21	9.43	7.31	8.49	8.75	8.99	8.19	7.6	11.13	7.6	9.33	8.79	9.81	6.44	7.57	9.61	8.44	7.6	7.96	8.24	8.96	6.89	10.97	5.22	8.41		ABCB7	10.165	7.59167	8.85833	8.25667	8.23		ABCB7	1.03	0.0925991	-1.03	-0.330565	0.154215	0.0320702
abd-A	3.6	3.79	4.25	4.43	2.35	1.38	3.37	3.08	2.59	1.71	3.83	6.42	2.14	3.34	0.91	0.74	1.35	1.41	4.61	2.76	1.54	2.07	2.94	2.19	1.59	0.11	0.76	1.22	1.26	3.92	3.71	1.56	1.12	2.74		abd-A	3.3	3.5	1.64833	2.685	1.799		abd-A	2.84	0.00143078	-2.84	-1.64135	0.447707	0.000246257
Abd-B	0.95	0.65	1.03	0.92	0.23	0.17	0.49	0.27	0.18	0.05	0.61	0.94	0.21	0.49	0.37	0.21	0.42	0.18	0.91	0.55	0.06	0.39	0.35	0.33	0.43	0.19	0.48	0.84	0.65	1.29	0.96	0.33	0.88	0.6		Abd-B	0.658333	0.423333	0.313333	0.431667	0.665		Abd-B	0.82	0.151723	-0.82	-1.05053	0.555803	0.0587427
Abi	9.71	10.28	12.54	9.41	10.78	11.04	10.61	7.53	13.28	8.13	13.02	8.02	29.3	30.03	32.63	34.89	35.58	36.36	15.35	9.99	6.96	8.36	8.41	22.21	35.85	35.79	36.32	30.51	37.49	18.5	16.41	41.35	39.69	30.61		Abi	10.6267	10.0983	33.1317	11.88	32.252		Abi	23.51	3.07163e-24	23.51	1.16126	0.109238	2.14974e-26
Abl	3.03	7.9	3.86	2.02	8.75	4.7	2.78	4.05	8.56	6.54	4.81	4.51	15.88	35.31	48.2	43.01	24.13	21.73	7.22	5.46	4.72	2.75	2.86	15.65	17.38	29.24	41.51	40.59	46.63	8.34	10.11	27.12	13.22	17.45		Abl	5.04333	5.20833	31.3767	6.44333	25.159		Abl	11.21	6.1824e-12	11.21	2.00546	0.270915	1.33587e-13
abo	6.21	4.76	4.01	3.31	6.82	3.89	3.5	2.25	10.69	5.31	5.29	4.83	9.41	9.82	9.36	7.79	7.26	8.21	5.13	4.38	2.81	3.93	3.57	2.18	7.07	6.59	4.51	9.72	6.88	5.36	7.39	7.9	8.75	6.2		abo	4.83333	5.31167	8.64167	3.66667	7.037		abo	0.18	0.657078	0.18	0.205716	0.254363	0.41866
Abp1	9.64	9.09	5.71	8.67	8.87	9.25	6.75	7.61	6.79	8.08	9.52	7.17	10.33	11.98	10.38	10.37	9.02	11.31	5.3	9.29	7.26	8.35	5.48	7.88	7.78	12.04	7.19	9.85	9.19	6.73	5.89	11.33	6.19	8.73		Abp1	8.53833	7.65333	10.565	7.26	8.492		Abp1	0.15	0.712293	-0.15	-0.118121	0.166678	0.478524
abs	11.52	10.61	10.13	8.91	22.23	12.97	9.21	8.24	23.41	11.86	14.35	9.16	24.27	27.14	36.14	28.38	22.19	24.47	15.22	8.59	8.48	7.85	5.46	12.2	16.68	20.67	32.78	31.7	30.38	12.13	11.77	19.91	16.08	16.07		abs	12.7283	12.705	27.0983	9.63333	20.817		abs	2.2	0.00627282	2.2	0.578137	0.180331	0.00134603
ac	0	0	0	0	0.16	0	0	0.07	0	0	0	0	0	0	0.25	0.09	0.08	0.09	0	0	0.08	0	0	0	0	0	0	0	0	0	0	0	0	0		ac	0.0266667	0.0116667	0.085	0.0133333	0		ac	0	NA	0	1.08338	1.24654	0.384786
Ac3	0.13	0.1	0.08	0.16	0.73	0.2	0.32	0.22	0.29	0.32	0.16	0.11	0.12	0.26	0.12	0.52	0.34	0.35	0.07	0.16	0.13	0.17	0.26	0.64	0.22	0.35	0.45	0.68	0.37	0.06	0.35	0.36	0.17	0.11		Ac3	0.233333	0.236667	0.285	0.238333	0.312		Ac3	0.17	0.67719	-0.17	-0.309611	0.400012	0.438929
Ac13E	0.92	0.7	0.33	0.78	0.39	0.83	0.5	0.69	0.53	0.42	0.65	0.5	0.3	0.77	0.5	0.43	0.84	0.47	0.27	0.56	0.41	0.76	0.57	0.39	0.52	0.16	0.67	0.63	1.07	0.65	0.45	0.35	0.55	0.35		Ac13E	0.658333	0.548333	0.551667	0.493333	0.54		Ac13E	1.16	0.0687595	-1.16	-0.60812	0.266476	0.0224845
Ac76E	1.75	1.43	2.26	2.64	1.38	1.33	1.85	1.49	1.31	1.61	1.37	2.22	0.88	0.65	0.67	0.69	0.87	0.83	1.92	0.87	1.4	1.59	1.74	1.45	0.86	0.44	0.98	1.03	1.15	1.07	1.68	0.74	1.2	0.99		Ac76E	1.79833	1.64167	0.765	1.495	1.014		Ac76E	8.91	1.23385e-09	-8.91	-1.69425	0.256532	3.99072e-11
Ac78C	0.94	1.32	1.15	1.1	2.13	1.45	0.99	0.79	1.47	1.64	1.51	1.08	10.79	10.06	15.64	13.39	12.78	13.29	1.92	1.3	1.5	0.87	1.2	10.09	10.48	13.38	20.57	18.08	21.23	5.95	6.61	18.61	8.62	11.58		Ac78C	1.34833	1.24667	12.6583	2.81333	13.511		Ac78C	79.06	8.64721e-80	79.06	2.79053	0.144581	5.2881e-83
acal	0	0	0.07	0	0.13	0	0.09	0	0	0.11	0.1	0	0	0.27	0.33	0.15	0	0	0	0	0	0	0	0.38	0.19	0.07	0.62	0	0.79	0.32	0	0.42	0	0.3		acal	0.0333333	0.05	0.125	0.0633333	0.271		acal	0.08	0.834392	0.08	0.533156	1.15477	0.644297
Acam	0.59	0.19	0.26	0.06	8.76	0.32	0.04	0.35	12.98	0.76	0.37	0	0.19	12.75	0.88	5.19	6.63	5.38	0.71	2.36	0.12	0.69	0.35	0.07	0.97	0.21	0.39	6.77	0.75	2.58	0.12	3.55	0	1.65		Acam	1.69667	2.41667	5.17	0.716667	1.699		Acam	0.14	0.726382	0.14	0.675044	0.990267	0.495442
ACC	14.52	11.65	10.53	12.58	4.65	13.52	11.64	6.95	5.96	5.38	13.09	9.4	7.35	3.1	2.77	2.96	3.46	3.72	6.1	8.34	5.51	11.52	9.92	4.4	7.43	3.13	2.82	2.53	4.07	5.78	13.32	5.63	4.54	6.67		ACC	11.2417	8.73667	3.89333	7.63167	5.592		ACC	4.17	6.74051e-05	-4.17	-1.66444	0.371551	7.4747e-06
AcCoAS	26.86	15.11	16.66	19.75	8.02	25.09	19.5	19.53	13.95	11.09	15.85	17.57	14.61	9.7	9.07	11.81	12.21	9.05	6.18	19.15	7.75	20.44	23.53	10.34	14.13	10.88	8.35	12.85	14.97	9.56	33.22	10.96	8.1	18.78		AcCoAS	18.5817	16.2483	11.075	14.565	14.18		AcCoAS	3.56	0.000277867	-3.56	-1.14009	0.276786	3.80445e-05
Ace	0.55	0.35	0.49	0.82	1.11	1.17	0.57	0.62	0.45	0.75	0.49	0.16	0.35	0.94	0.36	0.38	0.86	0.58	0.19	0.68	0.82	0.92	0.78	0.91	0.32	0.08	0.79	1.06	0.92	0.67	0.57	0.3	0.82	0.45		Ace	0.748333	0.506667	0.578333	0.716667	0.598		Ace	0.28	0.528547	-0.28	-0.399663	0.383262	0.297045
Acer	23.41	26.94	26.73	20.35	24.63	24.5	29.97	13.82	29.28	20.56	30.71	24.12	16.37	11.77	9.94	11.58	15.16	14.45	42.32	23.33	17.41	18.8	18.54	16.37	19.89	11.54	9.31	11.1	15.67	15.94	21.28	19.44	14.95	22.25		Acer	24.4267	24.7433	13.2117	22.795	16.137		Acer	8.44	3.67153e-09	-8.44	-1.42862	0.222318	1.30975e-10
Acf	8.47	11.14	10.01	7.13	17.89	14.34	10.46	6.65	15.79	12.03	12.66	7.73	15.62	16.64	16.13	19.75	16.93	14.03	13.78	7.66	9.74	10.22	6.25	10.18	15.2	11.16	15.08	16.47	19.57	9.81	7.95	19.8	7.21	11.56		Acf	11.4967	10.8867	16.5167	9.63833	13.381		Acf	0.1	0.792859	0.1	0.0712602	0.128845	0.580216
achi	4.13	2.24	4.83	3.55	12.32	3.38	1.47	1.08	14.35	2.35	3.76	1.7	2.37	6.99	2.48	3.94	15.11	6.41	2.51	6.37	1.39	2.56	0.49	1.47	4.65	1.12	1	14.84	2.28	4.51	3.98	9.24	2.48	4.12		achi	5.075	4.11833	6.21667	2.465	4.822		achi	0.05	0.888001	0.05	0.194247	0.573028	0.734623
Achl	0.58	0.1	0.32	0.62	0.2	0.31	0.19	0.19	0.31	0.18	4.1	0.21	0.11	1.3	0.48	0.04	1.88	0.99	0.39	0.2	0	0.44	0	0.32	0.07	0.58	0.47	1.56	0.93	0.1	0.19	0.18	1.31	0.16		Achl	0.355	0.863333	0.8	0.225	0.555		Achl	0.1	0.785944	-0.1	-0.48636	0.856401	0.570095
acj6	0.54	0.11	0.22	0.35	1.02	0.36	0.09	0.16	1.36	0.21	0.27	0.06	0.39	1.24	0.34	0.51	1.55	1.02	0.21	0.4	0.14	0.27	0.06	0.36	0.76	0.27	0.67	1.67	1	0.52	0.31	0.74	1.98	0.27		acj6	0.433333	0.358333	0.841667	0.24	0.819		acj6	0.44	0.362563	0.44	0.809223	0.599924	0.177377
Ack	2.49	2.24	2.64	1.32	3.93	2.39	1.67	2.18	5.38	3.18	2.8	2.01	2.92	5.12	3.21	4.12	5.32	5.15	1.97	3.36	2.71	1.7	2.09	3.12	3.05	3.19	3.47	5.61	4.04	2.37	2.28	3.28	1.36	2.82		Ack	2.50167	2.87	4.30667	2.49167	3.147		Ack	0.04	0.908914	0.04	0.0639792	0.227212	0.778262
Ack-like	1.81	1.43	2.12	1.24	2.65	2.01	1.47	1.9	3.2	1.89	2.29	1.99	3.54	5.85	6.87	5.45	5.12	4.41	1.95	1.69	1.79	1.84	1.13	3.09	4.7	5.43	6.2	6.59	4.9	3.24	2.48	5.64	3.37	3.99		Ack-like	1.87667	2.12333	5.20667	1.915	4.654		Ack-like	4.68	2.10063e-05	4.68	0.727663	0.153164	2.02547e-06
Acn	11.91	16.65	15.72	13.59	19.08	16.65	15.82	12.43	25.63	15.67	15.15	12.02	23.9	24.29	29.37	33.88	20.71	19.51	22.08	11.01	11.03	15.28	13.75	19.8	21.26	23.37	28.49	24.95	30.89	13.97	14.76	26.76	15.72	22.2		Acn	15.6	16.12	25.2767	15.4917	22.237		Acn	0.12	0.750282	0.12	0.105528	0.165362	0.523367
Acon	59.01	52.9	57.44	72.47	50.19	56.97	62.06	66.38	32.14	46.77	53.28	54.7	26.93	28.77	25.69	25.16	21.27	35.07	42.95	42.53	53.64	80.14	76.41	61.51	38.57	26.89	24.09	32.61	27.95	58.69	61.52	26.03	29.41	56.16		Acon	58.1633	52.555	27.1483	59.53	38.192		Acon	6.63	2.33101e-07	-6.63	-1.56679	0.275358	1.27028e-08
Acox57D-d	12.29	11.06	8.5	13.7	6.72	9.19	14.8	8.55	8.53	5.88	7.89	6.67	7.78	11.54	5.16	2.99	9.87	6.15	6.05	9.44	7.08	11.44	10.16	7.52	4.85	6.11	4.29	4.26	4.24	8.27	7.5	3.06	0.8	10.33		Acox57D-d	10.2433	8.72	7.24833	8.615	5.371		Acox57D-d	1.16	0.0691372	-1.16	-0.837587	0.367434	0.0226339
Acox57D-p	4.7	4.08	3.99	5.5	3.17	2.51	3.93	5.79	4.65	2.79	3.2	3.3	2.25	3.79	4.39	4.06	4.5	3.81	2.74	8.03	2.68	3.95	2.89	3.08	2.44	5.96	5.41	7.14	4.18	2.63	3.09	1.93	1.31	4.96		Acox57D-p	3.99167	3.94333	3.8	3.895	3.905		Acox57D-p	1.46	0.0345602	-1.46	-0.669217	0.25945	0.00989817
Acp1	58.04	31.06	109.14	63.14	11.73	8.57	37.76	57.68	12.86	4.66	3.76	138.28	2.93	0.48	0	0.17	0	10.38	120.71	101.05	8.89	38.76	62.58	7.89	6.51	0.18	1.15	0.18	0.94	49.73	78.05	5.47	1.33	75.2		Acp1	46.9467	42.5	2.32667	56.6467	21.874		Acp1	3.07	0.000850952	-3.07	-3.99708	1.04787	0.000136458
Acp24A4	0	0.08	0	0	1.63	0	0	0	1.33	0	0.48	0.45	0	0.11	0.42	0	1.19	0.23	0.69	0	0	0.2	1.19	0	0	2.14	0.11	0	1.75	2.29	0.4	0	0	0.73		Acp24A4	0.285	0.376667	0.325	0.346667	0.742		Acp24A4	0.08	0.836305	-0.08	-0.502483	1.10134	0.648212
Acp26Aa	0.4	0	0.16	0.43	0	0.15	0	0	0	0	0	0	0	1.38	0	0.5	0.99	0	0.37	0	0	0.14	0	0.35	0	0	1.27	0.53	2.72	0	0	0	3.2	0		Acp26Aa	0.19	0	0.478333	0.143333	0.772		Acp26Aa	0.54	0.287568	0.54	2.0569	1.36063	0.130604
Acp26Ab	0	0	0	0	0	0	0	0	0	0	0	0	0	0	0	0	0	0	0	0	0	0	0	0	0	0	0	0	0	0	0	0	0	0		Acp26Ab	0	0	0	0	0		Acp26Ab	0	NA	0	NA	NA	NA
Acp29AB	0.54	0	0	0	0	0	0	0	0	0	0	0.17	0	0.41	0	0	0.75	0	0	0	0	0	0	0	0	0	1.05	0	0	0	0	0	0	0		Acp29AB	0.09	0.0283333	0.193333	0	0.105		Acp29AB	0	NA	0	0.797798	1.35453	0.555871
Acp32CD	0	0	0	0	0	0	0	0	0	0	0	0	0	0.08	0	0	0	0	0	0	0	0	0	0	0	0	0	0	0	0	0	0	0	0		Acp32CD	0	0	0.0133333	0	0		Acp32CD	0	NA	0	0.17383	1.34851	0.897433
Acp33A	0	0	0	0	0	0	0	0	0	0	0	0	0	0	0	0	0	0	0	0	0	0	0	0	0	0	0.47	0	0	0	0	0	0	0		Acp33A	0	0	0	0	0.047		Acp33A	0	NA	0	NA	NA	NA
Acp36DE	0.17	0.02	0.05	0.15	1.03	0.13	0.09	0	0.89	0.11	0.04	0	0	0.55	0	0.57	1.04	0.68	0.25	0.5	0.07	0.07	0.1	0	0	0	0.08	1.11	0	0.48	0	0.3	0.11	0.21		Acp36DE	0.258333	0.188333	0.473333	0.165	0.229		Acp36DE	0.15	0.71571	0.15	0.748667	1.06527	0.482181
Acp53C14a	0	0	0	0	0	0	0	0	0	0	0	0	0	0	0	0	0	0	0	0	0	0	0	0	0	0	0	0	0	0	0	0	0	0		Acp53C14a	0	0	0	0	0		Acp53C14a	0	NA	0	NA	NA	NA
Acp53C14b	0	0	0	0	0	0	0.33	0	0	0	0	0	0	0	0	0	0.67	0	0	0	0	0	0	0	0	0	0	0	0	0	0	0	0	0		Acp53C14b	0	0.055	0.111667	0	0		Acp53C14b	0	NA	0	0.134602	1.34874	0.920504
Acp53C14c	0.29	0.08	0.22	0.4	0	0.22	0.3	0.17	0	0.19	0.08	0	0	0.33	1.28	0	0.5	1.76	0.17	0.08	0	0.88	0	0.62	0	1.31	0.56	1.11	0.16	0	0.3	0.55	0	0.61		Acp53C14c	0.201667	0.123333	0.645	0.291667	0.46		Acp53C14c	0.51	0.312034	0.51	1.44702	0.994438	0.145638
Acp53Ea	0	0	0	0	0	0	0	0	0	0	0	0	0	0	0	0	0	0	0	0	0	0	0	0	0	0	0	0	0	0	0	0	0	0		Acp53Ea	0	0	0	0	0		Acp53Ea	0	NA	0	NA	NA	NA
Acp54A1	0	0	0	0	0	0	0	0	0	0.44	0	0	0	0	0	0	0	0	0	0	0	0	0	0	0	0	0	0	0	0	0	0	0	0		Acp54A1	0	0.0733333	0	0	0		Acp54A1	0	NA	0	-0.242331	1.34851	0.857387
Acp62F	0.75	0	0.82	0.15	1.23	0	1.02	0.77	0	0.84	0.6	0.68	0	0.98	1.12	1.95	1.05	0.18	1.04	0.83	0.15	1.77	0	1.31	0.15	1.43	2.85	2.42	3.59	1.1	2.09	1.03	0	0.55		Acp62F	0.491667	0.651667	0.88	0.85	1.521		Acp62F	0.03	0.93888	-0.03	-0.14516	0.726906	0.841719
Acp63F	0.5	0	0	0	0.28	0.15	0	0	0	0.13	0	0.13	0	2.57	0	0	0.7	0.33	0	0	0	0	0	0	0.86	2.33	0	0	0	0	0	1.15	0	0		Acp63F	0.155	0.0433333	0.6	0	0.434		Acp63F	0.36	0.440653	0.36	1.52865	1.27533	0.230672
Acp65Aa	25.8	21.86	23.81	31.19	23.63	16.47	16.31	55.51	7.47	53.01	19.25	129.4	6.51	1.12	0	0	0	0.73	27.29	64.41	63.38	18.25	34.12	5.4	3.19	0.25	0	0	0.99	6.91	18.72	1.42	0	4.78		Acp65Aa	23.7933	46.825	1.39333	35.475	3.626		Acp65Aa	4.55	2.80712e-05	-4.55	-4.67207	0.997128	2.79244e-06
Acp76A	0	0	0	0	0	0	0	0	0	0	0	0	0	0.25	0	0	0	0	0	0	0	0	0	0	0	0	0	0	0	0	0	0	0	0		Acp76A	0	0	0.0416667	0	0		Acp76A	0	NA	0	0.38191	1.34851	0.777017
Acp95EF	44.75	84.75	69.08	37.02	71.73	53.6	46.07	60.52	56.16	63.56	53.32	50.92	50.06	58.07	85.75	70.04	76.1	73.66	87.66	63.44	42.68	28.69	35.72	58.69	82.66	69.29	68.48	73.59	46.66	50.74	38.26	85.85	50.46	48.53		Acp95EF	60.155	55.0917	68.9467	52.8133	61.452		Acp95EF	0.56	0.27601	-0.56	-0.269532	0.175307	0.124174
Acp98AB	0	0	0	0	0	0	0	0	0	0	0	0	0	0	0	0	0	0	0	0	0	0	0	0	0	0	0	0	0	0	0	0	0	0		Acp98AB	0	0	0	0	0		Acp98AB	0	NA	0	NA	NA	NA
Acph-1	6.15	10.39	9.18	5.72	14.5	8.13	12.87	8.76	17.6	6.78	14.64	7.42	9.47	20.92	16.23	17.79	14.26	16.91	9.86	7.11	7.97	8.65	3.72	7.58	10.17	19.92	19.84	20.81	18.72	8.68	7.32	15.77	9.71	12.13		Acph-1	9.01167	11.345	15.93	7.48167	14.307		Acph-1	0.04	0.907175	-0.04	-0.0598822	0.208862	0.774336
Acsl	10.23	7.8	6.47	9.45	5.02	12.37	11.43	7.44	7.61	6.39	12.27	4.29	4.91	4.76	4.5	5.79	6.13	5.35	4.83	7.36	4.88	10.59	8.81	4	6.99	5.02	5.49	5.05	6.54	5.56	5.39	5.87	3.03	5.97		Acsl	8.55667	8.23833	5.24	6.745	5.491		Acsl	5.31	4.9095e-06	-5.31	-1.2074	0.23806	3.93974e-07
Act5C	1241.14	1862.69	1322.9	1293.09	1369.57	1769.32	1311.19	1196.05	1144.77	1258.39	1614.32	986.83	4257.71	4032.3	5992.38	5620.77	4725.37	5302.3	1406.86	1437.91	936.9	1359.74	1301.39	3121.95	3949.11	5060.67	5924.05	4735.79	6147.61	2586.94	2531.35	6231.09	3353.71	4206.99		Act5C	1476.45	1251.92	4988.47	1594.12	4472.73		Act5C	17.92	1.19819e-18	17.92	1.40535	0.150894	1.23751e-20
Act42A	852.45	1205.14	1358.7	418.36	1314.54	1194.71	839.08	544.15	1570.02	972.55	1620.69	937.19	3829.07	5165.29	6355.67	6179.98	4880.37	5808.55	1646.88	917.75	767.12	603.75	475.88	2156.78	4339.55	7157.12	6696.85	5363.09	5335.64	1990.9	1707.15	5168.82	3248.49	3428.14		Act42A	1057.32	1080.61	5369.82	1094.69	4443.57		Act42A	23.6	2.52773e-24	23.6	1.78166	0.167284	1.73474e-26
Act57B	614.89	814.16	1247.03	1065.21	2032.59	753.24	1309.01	1544.84	529.03	840.42	405.26	1198.11	214.57	69.06	73.93	27.99	74.49	212.1	1524.87	530.93	962.06	1364.89	2409.39	1899.22	291.34	39.48	80.64	71.04	32.27	1019.71	3331.1	199.88	350.26	960.99		Act57B	1087.85	971.112	112.023	1448.56	637.671		Act57B	8.4	3.95506e-09	-8.4	-3.56749	0.556317	1.4297e-10
Act79B	0.36	0.17	0.16	0.29	1.19	0.86	0.44	0	0.51	0.61	0.46	0.26	1.45	1.73	1.94	1.97	0.36	1.96	0.32	0.17	0.44	0.28	0.06	0	0.45	1.56	2.03	2.97	1.97	0.53	0.72	0.7	0	0.53		Act79B	0.505	0.38	1.56833	0.211667	1.146		Act79B	1.78	0.0166999	1.78	1.46234	0.511352	0.00423967
Act87E	122.81	196.59	159.26	181.99	184.14	56.63	156.76	261.6	72.91	255.45	106.44	401.98	28.51	13.5	11.79	2.27	10.69	21.95	273.89	195.54	217.04	175.24	346.53	224.34	44.06	7.68	8.73	8.34	4.22	168.22	264.85	32.04	27.21	97.94		Act87E	150.237	209.19	14.785	238.763	66.329		Act87E	10.83	1.49102e-11	-10.83	-4.22928	0.581252	3.43451e-13
Act88F	0.05	0	0	0	0	0.14	0	0	0	0	0.16	0	0.76	0.57	0.21	0	0.26	0.88	0.28	0.36	0	0.26	0	0.04	0.6	0.39	0	0.24	1.04	1.02	0.52	0.81	0	1.03		Act88F	0.0316667	0.0266667	0.446667	0.156667	0.565		Act88F	1.47	0.0339649	1.47	2.86787	1.10875	0.00969337
Actbeta	0.44	0.67	0.47	0.49	1.22	0.44	0.98	0.34	1.15	0.9	1.37	0.23	0.93	1.17	0.45	0.43	1.5	0.48	0.72	0.35	0.43	0.74	0.56	1.05	0.85	0.29	0.41	1.19	0.77	0.89	0.35	0.29	0.17	0.38		Actbeta	0.621667	0.828333	0.826667	0.641667	0.559		Actbeta	0.28	0.522644	-0.28	-0.472231	0.448432	0.292308
Actn	26.46	31.17	45.82	44.37	33.79	27.68	41.03	30	10.21	34.59	21.75	44.81	7.16	5.05	5.01	4.7	5.05	12.62	39.2	16.41	33.6	37.08	36.61	37.84	8.57	4.06	6.69	4.21	6.7	20.82	34.78	7.63	6.48	16.25		Actn	34.8817	30.3983	6.59833	33.4567	11.619		Actn	8.53	2.9233e-09	-8.53	-2.77718	0.429651	1.02098e-10
Actn3	0.64	1.74	0.17	1.14	12.45	0.81	0.06	0.19	11.01	1.4	0.6	0.2	0	8	0.32	4.97	8.8	7.25	1.31	4.81	0	1.03	0.64	0.19	0.39	0	1.26	9.23	0	2.91	1.35	4.65	0	1.74		Actn3	2.825	2.24333	4.89	1.33	2.153		Actn3	0.14	0.718345	0.14	0.689143	0.987421	0.485226
ACXA	0.16	0.03	0	0.07	0.67	0	0	0	1.35	0.06	0	0.09	0	1.04	0.18	0.35	0.82	0.93	0.09	0.26	0	0.1	0	0.04	0.2	0.2	0.33	1.51	0.37	0.52	0.36	0.41	1.04	0		ACXA	0.155	0.25	0.553333	0.0816667	0.494		ACXA	0.11	0.768626	0.11	0.668323	1.11222	0.547914
ACXB	0	0	0.23	0	0.35	0	0	0	0.35	0	0	0	0	0.11	0	0	0.48	0.52	0	0.07	0	0.17	0	0	0	0	0	0	0	0.11	0.44	0	0	0.17		ACXB	0.0966667	0.0583333	0.185	0.04	0.072		ACXB	0.11	0.777552	0.11	0.790497	1.3528	0.558992
ACXC	0.24	0.3	0	0.17	2.91	0.18	0.03	0.06	4.79	0.03	0.16	0	0	3.27	0.14	2.4	3.49	1.59	0.88	1	0	0.1	0.06	0.08	0.45	0	0.19	2.48	0.32	0.71	0.3	2.47	0	0.54		ACXC	0.633333	0.845	1.815	0.353333	0.746		ACXC	0.11	0.767645	0.11	0.668081	1.10743	0.546329
ACXD	2.65	1.09	1.06	3.27	0.72	3.09	2.65	2.01	0.81	0.61	2.38	0.68	1.13	0.56	0.03	0.25	0.66	0.25	0.39	2.4	1.04	1.22	1.62	0.59	0.82	0.51	0.34	0.2	0.19	1.06	0.61	1.03	0	0.95		ACXD	1.98	1.52333	0.48	1.21	0.571		ACXD	2.14	0.00727794	-2.14	-2.07126	0.656435	0.00160325
ACXE	0.17	0.08	0.15	0	0.56	0.07	0.05	0.03	0.64	0	0.08	0.06	0.06	0.26	0	0.16	0.78	0.68	0.03	0.57	0	0.34	0	0	0.46	0	0.27	0.89	0	0.36	0.2	0.42	0	0.62		ACXE	0.171667	0.143333	0.323333	0.156667	0.322		ACXE	0.15	0.703691	0.15	0.685441	0.946126	0.468776
Acyp	0	0	0	0	1.55	0	0	0	3.57	0.23	0	0	0	3.29	0	0.3	0.25	0.3	0	0.6	0	0	0	0	0	0	0	0	0.4	0.26	0	0.35	0	0		Acyp	0.258333	0.633333	0.69	0.1	0.101		Acyp	0.01	0.974021	-0.01	-0.100352	1.28058	0.937538
Acyp2	33.74	45.89	28.41	27.68	63.5	37.38	32.56	43.39	76.32	43.78	42.09	40.3	40.56	70.41	51.96	61.88	59.29	59.33	52.32	46.53	46.1	32.11	35.8	38.93	39.18	61.64	42.78	54.11	38.73	36.06	24.7	52.87	29.16	52.99		Acyp2	39.4333	46.4067	57.2383	41.965	43.222		Acyp2	0.59	0.259402	-0.59	-0.253046	0.160594	0.115098
Ada	2.01	4.8	4.22	3.77	4.98	2.76	1.64	3.72	5.95	3.22	4.7	2.91	4.26	5.29	7.66	7.11	6.54	5.42	5.13	4.2	4.52	2.77	4.15	5.59	5.28	6.9	11.9	5.4	7.37	3.35	3.45	5.82	3.18	3.13		Ada	3.75667	3.69	6.04667	4.39333	5.578		Ada	0.14	0.724867	0.14	0.167673	0.244898	0.493554
Ada1-1	4.79	9.44	7.16	5.41	13.96	6.23	6.77	5.46	13.83	7.05	8.66	6.71	12.89	16.05	12.86	13.19	15.16	17.3	9.02	7.06	3.25	6.95	3.86	5.42	8.95	12.4	9.51	15.01	9.32	6.43	6.19	12.3	10.08	9.99		Ada1-1	7.83167	8.08	14.575	5.92667	10.018		Ada1-1	0.8	0.157405	0.8	0.308489	0.164834	0.0612742
Ada1-2	4.9	5.16	4.93	3.1	7.9	5.85	5.91	7.5	6.57	4.23	5.96	3.74	5.38	9.41	10.51	6.1	9.91	8.94	7.86	6.64	4.33	4.16	3.5	5.05	8.46	6.71	3.9	11.05	8.86	4.76	4.97	11.06	5.34	3.87		Ada1-2	5.30667	5.65167	8.375	5.25667	6.898		Ada1-2	0.01	0.967954	-0.01	-0.0247751	0.247003	0.920104
Ada2a	2.87	3.01	3.73	3.52	4.94	5.48	2.98	2.27	3.08	3.34	5.63	2.22	5.01	6.16	7.19	4.97	5.62	5.94	4.18	2.51	2.98	4.99	1.55	3.55	4.22	4.71	6.35	3.33	5.6	3.21	2.68	4.89	3.18	1.52		Ada2a	3.925	3.25333	5.815	3.29333	3.969		Ada2a	0.52	0.304481	0.52	0.293147	0.199137	0.140996
Ada2b	2.89	4.11	4.08	2.76	5.71	5.01	2.78	3.28	5.65	3.75	3.08	2.96	4.76	8.01	8.39	6.9	8.77	7.57	4.57	3.49	3.28	2.85	2.33	5.35	5.48	8.49	7.36	6.12	9.87	4.76	3.74	6.74	4.63	6.11		Ada2b	4.09333	3.58333	7.4	3.645	6.33		Ada2b	2.06	0.0086723	2.06	0.486847	0.157247	0.00196109
Ada3	2.59	2.67	2.79	1.59	2.54	3.38	2.66	1.34	3.7	3.32	3.66	2.19	4.31	5.28	4.76	4.88	4.35	5.69	3.08	2.46	2.99	1.83	1.98	3.67	4.39	6.53	3.63	6.7	5.31	1.95	2.29	4.65	3.78	4.25		Ada3	2.59333	2.81167	4.87833	2.66833	4.348		Ada3	0.52	0.302695	0.52	0.253675	0.171777	0.139737
AdamTS-A	2.68	1.09	1.91	2.66	2.4	3.21	2.13	0.99	1.37	1.89	2.41	1.7	19.32	11.27	15.37	13.47	22.41	26.6	1.46	1.41	1.41	1.94	1.51	27.28	19.76	21.19	29.9	26.16	27.78	11.03	15.97	36.18	21.17	28.83		AdamTS-A	2.325	1.74833	18.0733	5.835	23.797		AdamTS-A	20.14	7.31859e-21	20.14	2.78465	0.282447	6.26583e-23
Adar	1	1.51	1.35	0.91	2.75	1.82	1.04	0.79	1.56	1.39	2.09	1.32	1.6	2.44	3.66	3.13	3	2.87	1.89	1.08	1.02	0.92	0.92	1.82	2.04	2.67	3.78	3.24	4.17	0.9	1.59	2.74	1.41	1.74		Adar	1.55667	1.365	2.78333	1.275	2.428		Adar	1.4	0.0394398	1.4	0.465375	0.184388	0.0116066
Adat1	54.97	84.64	44.58	57.26	22.72	24.15	24.22	59.48	14.95	30.19	35.43	115.52	9.57	4.08	3.55	2.91	4.41	6.48	40.63	90.21	54.93	37.45	50.12	17.7	9.26	1.93	1.93	2.6	2.87	54.99	47.92	6.79	6.5	27.41		Adat1	48.0533	46.6317	5.16667	48.5067	16.22		Adat1	9.18	6.54193e-10	-9.18	-3.65414	0.544801	1.98254e-11
Adck	6.94	5.03	6.66	6.31	3.66	7.52	5.74	2.67	4.13	3.37	6.65	2.37	5.36	2.76	6.19	3.31	3.88	3.99	2.95	2.96	1.64	4.58	1.69	4.83	7.28	3.82	3.43	2.02	5.83	4.53	6.24	6.05	4.78	3.54		Adck	6.02	4.155	4.24833	3.10833	4.752		Adck	0.62	0.239472	-0.62	-0.496254	0.305467	0.104253
ADD1	8.83	8.99	8.29	6.65	19.45	11.29	7.28	6.17	18.04	9.29	11.45	6.68	10.17	17.14	19.92	17.92	21.72	18.41	12.23	8.57	6.97	7.24	4.67	11.32	12.8	8.86	15.96	18.67	23.34	8.75	6.91	18.3	8.86	11.59		ADD1	10.5833	9.81833	17.5467	8.5	13.404		ADD1	0.71	0.196515	0.71	0.31514	0.180553	0.0809121
ade2	3.25	2.95	2.46	1.99	3.83	3.48	4.03	3.98	3.94	2.43	3.09	2.85	2.4	7.48	6.79	6.18	3.72	4.96	4.68	2.83	2.24	3.46	2.36	1.78	3.93	5.5	3.6	4.46	4.01	1.85	2.71	3.83	4.19	3.11		ade2	2.99333	3.38667	5.255	2.89167	3.719		ade2	0	0.990463	0	0.00804079	0.269472	0.976195
ade3	2.6	2.68	2.95	2.69	4.48	3.83	2.85	3.37	2.77	4.99	2.56	8.5	2.3	15.56	2.79	2.42	3.05	2.91	2.91	5.57	3.84	3.54	3.49	3.28	1.89	6.23	1.94	1.85	1.73	2.15	2.11	0.92	1.59	1.57		ade3	3.205	4.17333	4.83833	3.77167	2.198		ade3	0.18	0.654175	-0.18	-0.43957	0.540023	0.415655
ade5	34.6	27.38	33.55	25.95	43.7	30.48	24.8	22.6	60.99	32.38	32.61	23.81	38.13	286.29	75.35	72.58	103	56.12	30.9	32.73	27.54	29.14	25.39	29.19	35.52	82.75	52.91	49.83	62.58	23.76	18.85	38.87	22.66	25.5		ade5	32.61	32.865	105.245	29.1483	41.323		ade5	1.6	0.0252319	1.6	1.10905	0.410303	0.00687161
AdenoK	55.35	45.17	57.97	49.59	40.83	65.52	69.05	21.07	37.22	29.51	72.69	43.34	48.53	58.92	48.92	43.5	59.32	60.6	49.85	32.51	23.25	43.21	29.47	36.42	42.91	32.7	28.53	25.82	41.99	43.86	43.12	42.03	27.67	29.6		AdenoK	52.405	45.48	53.2983	35.785	35.823		AdenoK	0.33	0.472124	-0.33	-0.326023	0.285066	0.252758
Adf1	5.26	7.35	5.99	4.58	10.29	6.55	4.55	3.67	8.05	7.21	6.08	6.36	8.32	14.92	17.08	16.66	17.12	19.34	7.13	4.06	6.11	4.43	3.03	11.61	12.59	20	19.9	19.1	19.58	7.38	8.41	16.98	10.91	14.35		Adf1	6.67	5.98667	15.5733	6.06167	14.92		Adf1	4.19	6.49918e-05	4.19	0.806302	0.179663	7.19383e-06
Adgf-A	7.6	4.09	3.72	6.09	3.64	6.09	4.04	6.7	5.72	2.63	5.61	1.85	21.06	15.16	15.5	15.32	19.04	19.46	2.74	8.47	7.31	12.69	3.78	13.47	20.74	23.3	25.56	21.67	21.23	14.58	13.39	21.59	18.53	16.5		Adgf-A	5.205	4.425	17.59	8.07667	19.709		Adgf-A	4.2	6.33079e-05	4.2	1.41595	0.315025	6.96637e-06
Adgf-A2	0.31	0.25	0.22	0.27	1.62	0.18	0.11	0.31	2.83	0.27	0.43	0.16	2.05	3.03	1.54	2.37	3.26	2.28	0.28	0.66	0.27	0.29	0.06	1.58	1.82	2.34	3.93	4.79	3.4	1.43	1.23	3.14	1.78	2.52		Adgf-A2	0.475	0.685	2.42167	0.523333	2.638		Adgf-A2	1.26	0.055395	1.26	1.40987	0.59235	0.0173069
Adgf-B	0	0	0	0.08	0.25	0	0	0	1.67	0	0.16	0	0	0.13	0.35	0.1	0.78	0.38	0	0	0.04	0	0	0.2	0	0	0.09	0	0.26	0	0	0.45	0	0		Adgf-B	0.055	0.305	0.29	0.04	0.08		Adgf-B	0.03	0.941937	-0.03	-0.224751	1.16414	0.84691
Adgf-C	2.47	1.25	1.53	2.95	0.99	1.18	2.69	0.52	1	1.61	0.19	1.84	0	0.79	0.65	0.36	0.18	0.93	1.32	1.29	1.65	2.14	1.6	1.92	1.25	0.14	0.47	0	0.1	1.46	2.84	0.42	0	0.3		Adgf-C	1.72833	1.30833	0.485	1.65333	0.698		Adgf-C	1.8	0.0158807	-1.8	-1.96658	0.683219	0.00399688
Adgf-D	4.4	1.87	1.87	2.51	1.58	2.37	3.5	1.03	1.88	1.24	2.96	1.74	0.41	6.29	0.69	0.69	2.14	2.19	0.84	1.59	1.06	2.13	2.01	1.54	1.08	2.78	0.28	0.61	0.49	2.17	1.95	0.81	0.07	1.55		Adgf-D	2.43333	2.05833	2.06833	1.52833	1.179		Adgf-D	0.24	0.575688	-0.24	-0.551468	0.575538	0.337972
Adgf-E	0	0	0	0.15	1.05	0	0.11	0	3	0	0	0	0	1.75	0.08	1.82	1.39	0.95	0	1.16	0.22	0.07	0	0	0	0	0	0.55	0.23	0	0.37	1.21	0.99	0.09		Adgf-E	0.2	0.518333	0.998333	0.241667	0.344		Adgf-E	0.07	0.859889	0.07	0.491875	1.21431	0.685429
Adh	1163.68	579.41	484.22	1157.69	447.13	1099.61	1052.67	1011.05	695.02	583.61	527.45	460.43	371.41	308.49	74.26	84.07	374.95	227.15	236.85	1302.51	503.56	727.65	1051.23	289.27	391.38	196.59	82.94	157.96	191.96	596.51	758.99	261.12	125.98	657.64		Adh	821.957	721.705	240.055	685.178	342.107		Adh	4.16	6.89269e-05	-4.16	-2.09734	0.468863	7.70433e-06
Adhr	1163.68	579.41	484.22	1157.69	447.13	1099.61	1052.67	1011.05	695.02	583.61	527.45	460.43	371.41	308.49	74.26	84.07	374.95	227.15	236.85	1302.51	503.56	727.65	1051.23	289.27	391.38	196.59	82.94	157.96	191.96	596.51	758.99	261.12	125.98	657.64		Adhr	821.957	721.705	240.055	685.178	342.107		Adhr	4.16	6.89269e-05	-4.16	-2.09734	0.468863	7.70433e-06
Adi1	84.33	83.95	65.21	98.81	49.87	70.02	88.51	83.2	96.11	78.83	85.57	76.59	42.31	88.47	56	75.18	55.46	48.44	75.08	103.21	70.68	80.56	86.49	51	54.96	94.02	51.08	54.79	53.49	61.38	85.11	47.17	18.64	66.26		Adi1	75.365	84.8017	60.9767	77.8367	58.69		Adi1	7.48	3.30394e-08	-7.48	-1.06831	0.176651	1.47046e-09
AdipoR	27.62	35.6	22.15	27.84	30.89	28.16	33.93	32.27	45.92	25.13	34.88	25.26	25.27	45.75	40.51	44.28	34.32	34.24	33.17	29.78	19.6	30.85	29.88	21.63	30.36	35.94	38.22	36.37	40.95	27.53	29.51	37.25	28.7	34.58		AdipoR	28.71	32.8983	37.395	27.485	33.941		AdipoR	1.56	0.0276018	-1.56	-0.391536	0.146778	0.00764079
Adk1	17.57	17.58	19.13	20.14	13.04	21.01	23.28	9.78	8.15	15.21	17.3	13.57	9.32	43.67	56.94	54.55	49.13	69.21	19.28	10.83	11.23	23.53	12.53	52.5	14.74	85.39	92.07	75.45	62.44	17.6	50.71	56.7	12.49	49.55		Adk1	18.0783	14.5483	47.1367	21.65	51.714		Adk1	1.49	0.0321548	1.49	1.02446	0.392762	0.00909783
Adk2	127.23	126.29	129.81	148.99	74.86	97.92	154.44	120.96	111.31	74.72	114.33	93.03	87.37	57.2	56.73	71.38	61.58	65.1	115.11	110.1	78.03	146.51	144.6	72.04	119.28	81.18	64.14	64.71	56.66	102.02	102.1	83.62	59.72	110.01		Adk2	117.517	111.465	66.56	111.065	84.344		Adk2	5.37	4.24759e-06	-5.37	-1.30812	0.256356	3.34797e-07
Adk3	9.15	9.33	7.35	9.45	14.4	8.42	8.31	9.98	18.92	6.49	6.46	8.84	3.93	13.7	8.89	9.48	12.3	7.23	9.02	11.81	6.25	8.96	10.99	3.59	4.88	6.85	6.87	13.1	6.7	5.59	9.28	6.56	1.73	8.16		Adk3	9.68333	9.83333	9.255	8.43667	6.972		Adk3	1.05	0.0893337	-1.05	-0.656649	0.303799	0.0306601
AdoR	0.58	0.74	0.64	1.67	0.21	0.65	0.55	0.96	0.59	0.25	0.47	1.09	0.54	2.05	1.46	1	1.26	1.24	0.31	0.78	0.29	0.79	0.46	1.1	0.55	1.53	3.07	2.69	1.9	0.67	1.26	1.42	0.29	1.04		AdoR	0.748333	0.651667	1.25833	0.621667	1.442		AdoR	0.12	0.757989	0.12	0.257227	0.412876	0.533276
adp	4.31	5.73	6.03	4.82	9.1	6.9	6.92	3.07	7.96	5.3	8.58	5.7	9.01	17.38	9.31	10.65	9.27	12.68	9.17	6.91	5.31	5.06	4.78	6.53	6.15	9.73	8.56	10.05	6.87	5.48	6.87	8.89	1.65	6.28		adp	6.14833	6.255	11.3833	6.29333	7.053		adp	0.49	0.325255	0.49	0.317208	0.222391	0.153767
ADPS	1.47	0.9	1.7	1.17	6.43	1.35	0.54	0.86	11.98	1.1	0.57	0.59	0.44	5.46	0.59	2.48	6.46	5.93	0.79	2.79	0.76	1.33	0.45	0.56	1.69	0.02	0.56	4.3	0.62	2.64	1.4	4.88	0	2.44		ADPS	2.17	2.60667	3.56	1.11333	1.855		ADPS	0.02	0.962978	0.02	0.0911819	0.759769	0.904473
AdSL	8.9	9.72	9.94	7.34	9.91	10.56	9.19	6.97	11.98	7.28	8.88	6.38	12.59	17.56	12.88	13.22	11.85	11.04	8.43	7.54	6.18	8.35	7.42	6.96	12.79	16.37	13.97	9.51	9.66	6.68	9.33	12.79	11.49	11.11		AdSL	9.395	8.44667	13.19	7.48	11.37		AdSL	0.11	0.784701	0.11	0.0881305	0.154424	0.568199
AdSS	41.92	36.59	27.61	37	28.1	33.05	33.06	35.82	19.43	39.53	36.47	32.96	26.85	12.8	22.68	19.32	18.76	21.04	26.16	32.76	31.69	32.73	23.44	26.35	27.49	18.8	16.91	17.92	17.74	30.22	29.68	21.72	17.26	28.34		AdSS	34.045	32.8783	20.2417	28.855	22.608		AdSS	4.05	8.91382e-05	-4.05	-1.2778	0.289861	1.04177e-05
Aduk	3.52	2.93	3.1	3.19	4.76	2.75	2.12	4.4	5.8	3.33	4.71	2.86	4.05	5.42	3.59	3.84	4.17	4.97	3.96	5.22	3.27	3.19	3.97	2.43	2.96	2.01	5.27	5.38	4.59	2.61	4.27	4.77	1.59	2.97		Aduk	3.375	3.87	4.34	3.67333	3.642		Aduk	0.65	0.225831	-0.65	-0.379929	0.228769	0.0967634
Ady43A	6.64	6.36	4.53	6.51	4.37	7.49	4.67	6.77	6.16	6.6	4.87	7.63	11.87	21.37	31.65	29.25	25.95	33.25	6.85	8.62	5.94	2.72	4.89	24.38	14.45	41.01	45.99	35.98	32.1	9.99	15.71	46.37	10.36	32		Ady43A	5.98333	6.11667	25.5567	8.9	28.396		Ady43A	6.14	7.27343e-07	6.14	1.41318	0.258465	4.56165e-08
Aef1	4.98	7.37	6.88	6.02	7.09	7.48	6.79	4.25	8.58	5.83	6.26	5.55	13.85	7.06	8.72	8.24	9.75	7.7	6.18	4.56	4.48	6.46	5.16	7.31	7.67	6.04	10.73	10.79	10.76	7.56	7.6	9.17	6.92	7.08		Aef1	6.63667	6.21	9.22	5.69167	8.432		Aef1	0.03	0.934588	0.03	0.0505376	0.233608	0.828727
aft	16.46	15.89	15.57	15.1	18.79	19.61	15.33	10.43	20.12	14.71	19.39	11.91	16.94	25.25	27.42	26.81	24.15	26.08	12.15	13.31	12.48	12.47	10.39	14.89	21.52	27.31	22.92	28.24	19	16.88	10.46	23.91	14.31	15.95		aft	16.9033	15.315	24.4417	12.615	20.05		aft	0.42	0.377456	0.42	0.119569	0.0907108	0.187459
Afti	2.39	2.25	2.38	2.3	4.25	3.16	2.1	1.64	4.25	2.4	2.71	1.95	3.51	2.99	3.85	4.68	4.8	4.68	2.99	2.1	1.85	2.33	1.64	3.47	4.12	3.53	5.32	4.41	5.09	3.25	2.12	4.94	3.54	3.89		Afti	2.78833	2.50833	4.085	2.39667	4.021		Afti	0.27	0.538392	0.27	0.171801	0.167324	0.304535
Ag5r	7.85	1.88	0.59	25.31	11.12	95.45	49.75	9.97	4.25	24.36	4.06	0.62	1.01	0.79	0.89	0.4	3.16	26.44	0	3.19	18.62	52.89	30.8	64.19	8.11	1.91	1.02	1.56	0.91	1.79	2.58	0.1	1.2	3.57		Ag5r	23.7	15.5017	5.44833	28.2817	2.275		Ag5r	0.93	0.116655	-0.93	-1.87391	0.923123	0.0423595
Ag5r2	791.67	210.93	160.56	905.15	130.28	73.86	324.66	1276	703.81	77.32	887.81	30.63	77.84	18.74	24.75	17.09	60.6	46.91	3.55	1933.93	1299.83	1735.66	1152.72	166.21	156.53	20.32	28.72	23.19	16.41	1508.14	851.95	79.16	35.64	309.38		Ag5r2	378.742	550.038	40.9883	1048.65	302.944		Ag5r2	6.64	2.30887e-07	-6.64	-3.96817	0.697088	1.25194e-08
AGBE	49.41	34.42	55.49	54.18	29.31	32.58	51.78	34.38	19.38	33.11	37.94	55.81	7.66	2.99	2.3	2.8	7.7	8.21	37.45	27.34	26.06	34.7	35.68	22.77	9.32	2.13	1.56	3.41	4.66	18.85	44.06	9.66	4.96	19.5		AGBE	42.565	38.7333	5.27667	30.6667	11.811		AGBE	11.84	1.46087e-12	-11.84	-3.38187	0.444795	2.88859e-14
ago	5.52	6.51	6.48	4.87	11.14	7.2	6.03	5.16	10.35	7.18	6.23	5.72	12.22	17.75	20.07	23.65	16.51	19.6	8.82	5.54	5.92	6.77	6.03	12.83	12.92	19.46	27.18	27.96	26.86	8.3	11.04	23.47	7.2	15.53		ago	6.95333	6.77833	18.3	7.65167	17.992		ago	9.28	5.30824e-10	9.28	0.869765	0.129044	1.58342e-11
AGO1	29.59	37.91	39.32	31.5	54.53	45.61	35.47	30.37	44.61	42.67	47.67	36.11	54.76	69.62	90.11	79.92	73.24	70.17	48.32	29.05	36.91	36.56	31.99	55.23	59.41	51.87	78.77	69.61	89.39	39.8	37.2	73.59	46.83	50.75		AGO1	39.7433	39.4833	72.97	39.6767	59.722		AGO1	2.89	0.00129658	2.89	0.313251	0.084789	0.00022034
AGO2	12.37	14.51	13.39	11.94	22.2	14.13	10.43	13.61	19.15	13.59	12.63	12.51	20.57	36.03	41.63	37.3	34.45	23.97	17.23	12.72	11.78	11.58	12.08	20.74	25.97	33.36	35.36	29.23	33.29	16.16	14.74	29.39	18.37	19.05		AGO2	14.7567	13.6533	32.325	14.355	25.492		AGO2	3.2	0.000636197	3.2	0.653851	0.16782	9.77401e-05
AGO3	0.56	1.06	0.62	0.43	1.3	0.79	0.42	0.62	1.36	1.08	0.73	1	1.61	2.43	3.12	2.87	2.07	1.64	1.07	0.89	0.96	0.53	0.47	1.59	1.64	1.68	3.42	3.23	3.49	0.92	1.17	2.45	1.77	1.56		AGO3	0.793333	0.868333	2.29	0.918333	2.133		AGO3	2.31	0.00492952	2.31	0.822082	0.250312	0.00102262
agt	153.15	188.26	186.15	151.19	125.51	191.63	146.57	138.52	139.05	156.97	170.78	143.47	167.64	126.52	158.96	128.83	149.39	151.63	182.58	147.28	128.44	137.98	134.6	142.72	185.94	156.5	137.54	138.04	137.9	157.28	107.64	178.7	152.99	153.05		agt	165.982	149.227	147.162	145.6	150.558		agt	2.56	0.0027382	-2.56	-0.590732	0.170172	0.000517797
Ahcy	127.41	94.7	138.32	129.84	69.5	132.73	127.98	57.21	67.72	67.42	103.15	71.79	90.76	77.03	88.54	79.49	73.17	79.55	89.27	70.04	57.76	99.1	74.28	65.09	104.32	88.6	75.94	70.6	71.85	69.78	88.81	85.45	73.78	77.67		Ahcy	115.417	82.545	81.4233	75.9233	80.68		Ahcy	1.39	0.0411129	-1.39	-0.586674	0.234063	0.0121939
AhcyL1	20.18	27.88	13.78	17.47	18.26	21.36	15.77	30.76	21.33	18.7	20.92	15.66	28.8	25.71	31.51	32.9	23.09	16.23	16.57	26.08	23.72	23.66	26.13	19.71	20.76	22.35	31.34	33.18	28.42	22.66	17.51	28.16	19.14	26.18		AhcyL1	19.8217	20.5233	26.3733	22.645	24.97		AhcyL1	0.21	0.616589	-0.21	-0.236953	0.269562	0.379385
AhcyL2	10.35	4.7	2.04	7.64	0.95	0.87	4.16	3.92	0.36	0.68	5.45	6.74	0.45	1.93	0.45	0	0.85	0.23	1.58	4.79	1.36	5.39	4.51	1.64	1.31	0.32	0.04	0.43	0.06	7.72	8.39	0.27	0.35	8.99		AhcyL2	4.425	3.55167	0.651667	3.21167	2.788		AhcyL2	2.7	0.00201122	-2.7	-2.82967	0.793616	0.000363105
AIF	13.55	15.04	16.15	14.98	15.75	17	10.35	5.16	15.52	11.21	17.2	8.83	16.07	18.07	15.74	14.04	18.38	18.02	9.35	9.68	7.24	12.03	8.38	10.68	17.53	13.75	13.26	14.21	15.66	12.03	10.71	19.19	8.82	15.51		AIF	15.4117	11.3783	16.72	9.56	14.067		AIF	0.03	0.924035	0.03	0.045671	0.188238	0.808296
AIMP1	44.36	49.12	55.93	49.02	40.88	60.59	51.17	32.35	46.08	43.09	58.31	43.87	84.55	45.3	51.55	61.95	59.49	57.08	57.78	38.66	37.88	46.14	36.15	45.74	76.64	71.91	61.36	47.31	55.07	38.46	37.11	63.52	62.6	43.31		AIMP1	49.9833	45.8117	59.9867	43.725	55.729		AIMP1	0.13	0.734034	-0.13	-0.149395	0.223813	0.504455
AIMP2	51.13	58.13	53.62	47.62	40.87	61.26	46.96	27.33	44.24	42.69	44.54	42.44	54.41	41.06	57.14	43.33	43.45	49.78	55.16	33.32	33.66	33.68	33.86	39.88	58.11	49.34	32.98	35.21	36.51	32.34	43.13	63.8	43.01	45.58		AIMP2	52.105	41.3667	48.195	38.26	44.001		AIMP2	0.84	0.145717	-0.84	-0.337842	0.176536	0.0556551
AIMP3	70.02	76.99	74.23	58.07	83.11	95.74	70.17	45.68	72.44	69.89	75.72	63.92	97.95	74.64	90.76	92.3	76.45	91.67	83.53	57.84	50.98	61.09	49.84	59.74	91.78	95.7	82.72	62.9	76.21	55.88	57.9	97.24	56.27	65.34		AIMP3	76.36	66.3033	87.295	60.5033	74.194		AIMP3	0.27	0.53243	-0.27	-0.157955	0.152456	0.300168
Ak6	29.66	37.17	40.49	32.4	50.53	42.64	36.81	19.49	26.37	26.77	47.38	29.74	62.36	33.02	43.04	43.5	29.9	39.8	39.77	21.57	22.63	29.19	13.65	28.33	49.38	23.9	34.97	31.51	32.06	25.49	21.72	47.98	42.54	27.3		Ak6	38.815	31.0933	41.9367	25.8567	33.685		Ak6	0.06	0.87617	-0.06	-0.101126	0.27647	0.714533
Akap200	10.53	17.92	16.51	10.47	29.98	20.51	12.39	12.78	23.09	21.08	15.27	12.66	45.23	78.66	89.11	90.53	70.11	49.37	22.77	9.12	16.56	14.73	13.65	37.25	36.86	43.78	87.28	71.04	80.21	22.95	23	54.51	38.84	39.14		Akap200	17.6533	16.2117	70.5017	19.0133	49.761		Akap200	15.24	5.76247e-16	15.24	1.54626	0.179731	7.75273e-18
Akh	2.63	2.08	2.35	9.16	19.93	15.14	9.84	6.3	1.5	9.07	1.52	0.86	5.53	8.27	2.79	3.65	5.24	4.75	3.1	1.41	13.41	7.01	5.27	20.45	4.16	5.69	5.59	4.72	10.64	3.73	3.79	0.98	0	3.48		Akh	8.54833	4.84833	5.03833	8.44167	4.278		Akh	0.22	0.603978	-0.22	-0.555378	0.613967	0.365692
AkhR	4.9	4.27	4.28	3.6	3	3.19	3.42	2.25	5.4	1.61	3.9	2.13	2.24	3.02	1.22	1	6.6	1.9	2.73	0.93	1.71	3	2.05	1.35	1.3	0.84	0.85	1.13	1.64	2.05	2.34	1.05	0.26	0.96		AkhR	3.87333	3.11833	2.66333	1.96167	1.242		AkhR	0.64	0.230364	-0.64	-0.722692	0.4384	0.0992551
akirin	92.07	152.34	142.84	92.43	179.58	153.79	102.22	87.02	152.76	126.43	147.45	111.43	194.23	211.53	258.73	246.06	232.84	226.28	156.39	100.7	103.32	95.36	73.18	164.81	206.33	192.34	228.29	203.28	225.74	127.15	100.34	252.23	145.79	171.9		akirin	135.508	121.218	228.278	115.627	185.339		akirin	5.47	3.37511e-06	5.47	0.359152	0.0697161	2.5823e-07
Akt1	8.16	13.6	12.81	10.31	19.01	14.21	9.63	6.83	11.93	12.57	11.75	8.93	16.74	23.44	27.71	24.87	22.66	17.98	14.47	9.18	9.27	11.54	10.34	17.45	16.11	16.75	25.49	25.88	25.86	13.06	13.89	23.25	14.08	15.96		Akt1	13.0167	10.2733	22.2333	12.0417	19.033		Akt1	4.13	7.49612e-05	4.13	0.547583	0.123	8.51126e-06
al	0.92	0.27	0.34	0.97	1.01	2.16	1.12	1.39	1.24	1.38	0.49	0.18	1.02	0.08	0.02	0.33	0.39	0.31	0.11	0.47	0.48	0.94	1.04	0.67	0.16	0.02	0.09	0.27	0.25	0.13	0.14	0.11	0.63	0.09		al	0.945	0.966667	0.358333	0.618333	0.189		al	1.4	0.0396182	-1.4	-1.78323	0.707008	0.0116618
AlaRS	27.57	32.78	39.28	31.77	26.32	30.43	32.24	18.24	26.68	23.13	30.24	23.03	32.28	22.76	29.34	29.04	22.32	28.5	33.7	20.72	17.42	22.97	20.76	22.33	34.63	30.51	30.27	25.94	27.52	25.27	21.22	30.35	17.02	23.93		AlaRS	31.3583	25.5933	27.3733	22.9833	26.666		AlaRS	1.3	0.0504546	-1.3	-0.456753	0.188633	0.0154617
AlaRS-m	4.43	4.61	4.52	3.41	4.03	4.58	4.26	3.63	3.55	2.71	5.69	3.77	4.92	5.24	5.56	5.51	5.09	6.34	3.56	3.94	4.81	4.15	2.87	3.67	4.41	5.22	6.16	6.31	5.78	3.52	4.63	6.58	4.92	2.12		AlaRS-m	4.26333	3.935	5.44333	3.83333	4.965		AlaRS-m	0.11	0.776854	-0.11	-0.113328	0.193394	0.557878
Alas	47.96	31.68	34.25	40.71	35.34	43.15	37.44	29.03	25.16	27.53	36.45	31.87	22.22	25.06	26.72	22.28	33.22	33.43	33.85	42.86	30.88	36.39	25.52	17.85	23.15	23.53	25.08	24.13	18.38	22.24	31	27.76	18.92	29.19		Alas	38.8483	31.2467	27.155	31.225	24.338		Alas	3.29	0.000510629	-3.29	-0.80127	0.202503	7.59508e-05
alc	27.33	38.04	40.15	22.03	35.92	23.49	29.46	20.08	43.43	28.34	45.34	22.72	30.67	35.4	30.6	35.74	32.13	31.58	54.27	26.85	23.14	24.82	22.39	22.42	40.65	40.15	32.62	31.29	32.92	23.31	22.1	46.84	33.49	36.18		alc	31.16	31.5617	32.6867	28.9817	33.955		alc	2.96	0.00109551	-2.96	-0.474227	0.126673	0.000181332
Ald	568.21	773.58	761.25	706.77	967.13	465.56	683.7	942.27	462.19	1119.08	439.39	1288.16	213.94	190.99	202.41	159.57	187.73	246.47	706.78	731.76	1040.99	574.85	695.37	748.55	238.75	157.3	187.02	176.89	179.26	435.81	740.38	232.79	138.61	451.26		Ald	707.083	822.465	200.185	749.717	293.807		Ald	11.19	6.45087e-12	-11.19	-2.64062	0.357029	1.40265e-13
Aldh	176.85	102.64	105.96	145.93	69.85	162.85	134.24	95.93	96.97	84.31	101.17	98.65	57.06	53.66	61.87	61.63	63.42	64.06	93.41	117.39	76.35	104.77	108.63	55.88	69.28	68.27	62.27	52.9	55.56	68.95	104.41	70.39	35.31	74.27		Aldh	127.347	101.878	60.2833	92.7383	66.161		Aldh	11.48	3.31291e-12	-11.48	-1.34886	0.180088	6.8883e-14
Aldh-III	31.43	24.94	25.57	30.5	21.07	32.12	28.46	22.34	28.6	20.93	34.44	19.14	16.08	27.49	28.58	27.96	22.93	19.82	24.95	31.61	21.42	24.28	18.83	13.91	16.62	29.69	24.14	21.86	24.64	14.33	12.99	21.87	11.78	24.59		Aldh-III	27.605	25.6517	23.81	22.5	20.251		Aldh-III	4.44	3.65902e-05	-4.44	-0.68407	0.147957	3.77414e-06
Alg-2	34.91	35.28	29.49	26.42	34.8	33.97	26	20.12	39.28	27.43	32.71	28.73	42.12	61.04	70.15	65.42	47.85	54.67	31.95	29.2	25.06	25.88	21.75	24.92	46.75	69.25	52	65.06	52.24	28.98	27.33	50.97	44.38	35.2		Alg-2	32.4783	29.045	56.875	26.46	47.216		Alg-2	2.9	0.00126514	2.9	0.406643	0.109858	0.000214311
Alg10	10.79	12.13	10.43	8.74	14.42	13.05	8.78	7.55	26.62	13.29	13.54	10.88	14.96	22.89	24.87	23.94	15.55	13.82	17.3	12.55	11.31	5.82	7.34	10.36	15.77	24.06	20.11	15.06	18.43	6.97	7.03	14.49	5.69	12.79		Alg10	11.5933	13.4433	19.3383	10.78	14.04		Alg10	0.01	0.98176	0.01	0.0131668	0.231454	0.954635
Alh	13.13	12.45	17.61	17.76	12.28	12.39	14.13	14.17	6.19	15.45	12.72	23.66	6.99	4.67	4.74	4.86	4.9	8.43	16.94	11.17	15.36	12.98	15.48	20.78	9.36	4.43	5.47	5.74	4.97	12.15	12.8	7.04	8.3	9.4		Alh	14.27	14.3867	5.765	15.4517	7.966		Alh	5.58	2.63204e-06	-5.58	-1.91359	0.367696	1.94761e-07
alien	9.1	9.7	10.9	6.67	14.63	10.57	9.1	9.33	15.06	10.53	12.31	11.01	12.86	18.29	16.17	17.21	14.95	16.15	11.35	9.14	9.89	8.6	7.42	9.82	17.5	19.01	15.95	19.2	15.01	10.95	10.55	15.37	12.1	13.13		alien	10.2617	11.2233	15.9383	9.37	14.877		alien	0.11	0.769154	-0.11	-0.0558753	0.0931849	0.548761
ALiX	17.16	14.95	14.68	11.53	14.34	16.64	14.47	13.44	17.95	14.01	15.9	14.48	26.31	27.42	32.24	29	19.75	26.46	16.33	14	12.64	11.79	11.8	16.33	24.52	35.05	27.04	28.03	24.43	16.65	17.19	24.59	19.78	21.7		ALiX	14.8833	15.0417	26.8633	13.815	23.898		ALiX	0.81	0.154654	0.81	0.263957	0.14034	0.0599932
Alk	1.53	0.75	1.94	2.39	3.05	3.34	2.11	1	0.56	2.43	1.32	1.34	0.16	0.51	0.39	0.4	0.7	1.55	1.39	0.89	2.12	2.87	1.66	2.91	0.69	0.22	0.6	1.28	0.83	0.78	1.64	0.4	1.17	0.8		Alk	2.16667	1.46	0.618333	1.97333	0.841		Alk	2.85	0.00142626	-2.85	-1.81586	0.495184	0.000245382
AlkB	3.18	7.01	3.96	4.2	8.24	1.95	2.24	7.07	9.94	4.84	5.75	4.24	7.22	10.37	7.02	8.77	10.83	4.49	8.12	3.94	5.23	4.07	4.25	5.02	7.1	13.2	11.15	12.37	9.66	3.55	5.08	11.82	4.79	8.02		AlkB	4.75667	5.68	8.11667	5.105	8.674		AlkB	0.01	0.968649	-0.01	-0.0308329	0.322272	0.92378
Alp1	0.79	2.43	1.22	3.2	15.4	2.87	1.21	9.51	3.18	8.71	1.19	8.71	0	1.81	0.59	1.05	0.39	1.82	2.36	3.81	15.28	4.41	3.54	4	0.74	0.66	0.5	0.48	1.06	3.48	3.53	1.3	0.12	2.77		Alp1	4.31833	5.41833	0.943333	5.56667	1.464		Alp1	3.69	0.0002057	-3.69	-3.01386	0.717936	2.69337e-05
Alp2	1.14	1.56	0	0.22	0	0.63	0	1.11	1.2	0.34	0.06	0.2	0.24	0	0.08	0	0.14	0	0	0.34	0.07	0.43	0	0	0	0	0.89	0	0.69	0.08	0	0.4	0	0.26		Alp2	0.591667	0.485	0.0766667	0.14	0.232		Alp2	1.38	0.0417624	-1.38	-2.61198	1.04457	0.0124007
Alp4	28.31	31.75	4.7	31.82	4.88	10.85	5.49	22.34	14.62	4.02	38	22.42	4.82	1.49	2	1.38	3.42	1.61	1.71	30.18	5.27	15.87	19.84	4.19	2.82	1.71	1.94	1.01	1.05	31.28	6.22	1.29	5.11	4.12		Alp4	18.7183	17.815	2.45333	12.8433	5.655		Alp4	7.23	5.88399e-08	-7.23	-3.23239	0.543597	2.74269e-09
alph	6.87	6.18	5.74	7.61	7.51	7.6	5.89	5.49	7.39	5.92	7.55	5.6	8.14	7	8.16	9.61	7.89	6.82	6.69	4.05	4.78	6.93	5.85	7.01	7.66	7.04	10.87	9.64	11.51	7.91	6.55	9.47	6.87	7.39		alph	6.91833	6.30667	7.93667	5.885	8.491		alph	0.82	0.151248	-0.82	-0.227688	0.120339	0.0584835
alpha-Cat	12.98	17.58	18.39	10.66	26.23	18.68	11.65	10.64	25.07	17.51	20.25	15.7	30.39	41.91	50.39	47.43	38.87	37.59	22.01	12.86	14.83	12.9	10.87	25.05	30.4	35.98	50.74	38.45	44.94	18.1	17.98	38.19	25.5	23.76		alpha-Cat	17.42	16.8033	41.0967	16.42	32.404		alpha-Cat	6.66	2.2064e-07	6.66	0.747105	0.13103	1.18565e-08
alpha-Catr	0.16	0.05	0.17	0.21	0.08	0.16	0.36	0.1	0	0.65	0.2	0.02	0	0	0	0	0.04	0.13	0	0.06	0.27	0.11	0	0.47	0	0	0	0.14	0	0	0.34	0	0	0		alpha-Catr	0.138333	0.221667	0.0283333	0.151667	0.048		alpha-Catr	1.48	0.0331627	-1.48	-2.8333	1.09143	0.00943255
alpha-Est1	12.53	15.98	7.12	13.27	10.74	9.32	14.72	12.44	19.4	7.88	13.44	7.2	6.4	6.76	6.2	3.7	7.8	7.12	10.35	16.73	10.19	12.9	12.85	4.38	4.88	5.32	4.26	4.62	6.7	11.83	8.78	9.44	3.06	8.93		alpha-Est1	11.4933	12.5133	6.33	11.2333	6.782		alpha-Est1	7.03	9.32724e-08	-7.03	-1.5107	0.257644	4.53148e-09
alpha-Est2	10.27	6.97	7.15	5.98	12.92	6.21	11.28	16.3	26.9	9.46	5.93	15.38	2.37	3.28	1.08	3.17	16.11	2.37	10.04	13.93	7.99	5.82	14.49	4.84	2.2	2.76	1.55	8.8	3.96	3.49	4.56	3.26	0	5.35		alpha-Est2	8.25	14.2083	4.73	9.51833	3.593		alpha-Est2	2.84	0.00145745	-2.84	-2.08014	0.568237	0.000251541
alpha-Est3	5.25	5.87	1.99	3.72	5.08	3.9	2.7	5.21	6.06	3.39	2.48	3.58	0.99	3.87	1.41	2.14	3.81	3.56	1.03	6.93	5.3	2.97	3.64	2.15	1.28	1.58	1.54	2.08	2.07	5.62	3.45	1.82	1.28	2.67		alpha-Est3	4.30167	3.90333	2.63	3.67	2.339		alpha-Est3	2.11	0.0078394	-2.11	-1.14886	0.367031	0.00174718
alpha-Est4	22.72	14.53	5.93	31.45	5.02	16.19	23.93	37.64	24.65	8.11	13.36	2.71	4.33	1.78	2.39	2.99	4.43	2.63	1.75	51.72	23.21	24.4	41.75	4.87	2.84	4.01	1.25	1.94	2.02	24.69	9.32	2.46	0	25.97		alpha-Est4	15.9733	18.4	3.09167	24.6167	7.45		alpha-Est4	6.65	2.23602e-07	-6.65	-3.04041	0.533515	1.20636e-08
alpha-Est4aPsi	0.03	0	0	0	0	0	0	0	0.53	0	0	0	0	0.05	0	0	0.13	0	0	0	0	0	0.04	0	0.04	0	0	0.21	0	0	0.04	0	0	0.21		alpha-Est4aPsi	0.005	0.0883333	0.03	0.00666667	0.05		alpha-Est4aPsi	0	NA	0	-0.507694	1.35204	0.707287
alpha-Est5	10.49	9.88	3.76	11.57	3.65	6.48	4.93	14.79	5.35	3.23	6.33	5.32	1.57	2.64	1.48	0.47	3.33	1.23	2.89	13.72	9.24	7.41	12.05	2.04	1.94	0.77	0.39	1.72	1.19	7.37	3.96	1.43	0.56	4.54		alpha-Est5	7.63833	6.65833	1.78667	7.89167	2.387		alpha-Est5	4.95	1.13102e-05	-4.95	-2.47038	0.505265	1.01213e-06
alpha-Est6	0.72	0.16	0.34	0.8	3.14	0.44	0	0	4.46	0.25	0.24	0.06	0	2.13	0.22	1.33	2.1	1.28	0.06	0.46	0	0.54	0.07	0	0.93	0.2	0.46	1.65	0.22	0.68	0.32	1.22	0	1.75		alpha-Est6	0.933333	0.835	1.17667	0.188333	0.743		alpha-Est6	0.02	0.949762	0.02	0.181546	1.09369	0.868162
alpha-Est7	20.57	19.35	18.83	19.4	18.78	22.96	29.09	18.79	24.58	23.03	18.23	14.76	11.78	13.89	9.85	9.99	15.12	13.58	21.79	21.96	17.74	22.73	22.58	15.04	17.64	20.01	7.59	10.8	12.05	16.03	13.63	12.07	11.83	16.34		alpha-Est7	19.9817	21.4133	12.3683	20.3067	13.799		alpha-Est7	8.55	2.84725e-09	-8.55	-1.35741	0.209825	9.84744e-11
alpha-Est8	7.75	5.8	5.71	5.94	5.99	5.19	7.82	5.5	7.9	4.63	14.37	5.03	12.52	10.33	8.9	9.56	10.31	5.74	6.02	4	4.09	3.72	6.91	6.9	12.38	6.65	10.72	8.05	10.3	10.66	5.14	11.81	6.6	4.65		alpha-Est8	6.06333	7.54167	9.56	5.27333	8.696		alpha-Est8	0.11	0.779738	-0.11	-0.165968	0.285944	0.561631
alpha-Est9	2.47	2.85	2.68	2.09	5.5	3.2	3.52	2.64	5.16	3.44	3.66	3.02	2.35	5.28	5.8	5.64	4.26	3.61	3.7	3.2	2.78	2.05	1.58	3.6	3.68	4.01	4.44	3.75	7.33	2.32	2.43	3.16	1.33	1.94		alpha-Est9	3.13167	3.57333	4.49	2.81833	3.439		alpha-Est9	0.5	0.316118	-0.5	-0.240591	0.166389	0.148189
alpha-Est10	11.77	6.41	3.42	7.49	1.48	1.15	2.88	3.03	1.95	0.87	2.57	9.33	0.69	1	0.67	0.65	0.88	0.5	1.61	5.48	1.32	4.14	5.06	1.48	1.04	0.39	0.21	0.9	0.66	4.88	3.84	0.72	1.96	3.32		alpha-Est10	5.28667	3.43833	0.731667	3.18167	1.792		alpha-Est10	6.07	8.60811e-07	-6.07	-2.79842	0.515072	5.53909e-08
alpha-Man-Ia	1.93	2.18	2.46	2.03	2.5	2.75	1.73	1.28	2.6	2.32	2.74	2.6	2.64	2.67	3.29	3.4	3.22	2.99	2.75	1.41	2.21	1.77	1.89	3.19	2.9	2.44	4.18	3.85	4.97	1.82	2.26	3.99	2.74	2.67		alpha-Man-Ia	2.30833	2.21167	3.035	2.20333	3.182		alpha-Man-Ia	0.13	0.748311	-0.13	-0.098956	0.154213	0.521077
alpha-Man-Ib	3.32	3.88	5.78	3.09	7.48	4.81	4.1	3.32	6.18	5.14	4.65	4.88	5.63	8.53	8.63	8.72	8.96	8.15	4.71	3.37	4.83	3	3.51	4.75	7.45	8.48	10.4	8.69	7.73	3.71	3.57	7.13	2.15	6.23		alpha-Man-Ib	4.72667	4.71167	8.10333	4.02833	6.554		alpha-Man-Ib	0.86	0.139307	0.86	0.221827	0.114483	0.0526673
alpha-Man-Ic	0.12	0.03	0.28	0	0.44	0.05	0	0.47	0.87	0.24	0.07	0.04	0	0	0.05	0	0.09	0.5	0.11	0.2	0.26	0.13	0	0.32	0	0	0	0	0	0.22	0	0.35	0	0		alpha-Man-Ic	0.153333	0.281667	0.106667	0.17	0.057		alpha-Man-Ic	0.51	0.310675	-0.51	-1.53979	1.05608	0.144835
alpha-Man-IIa	3.48	4.7	3.88	3.46	4.92	4.04	3.62	1.4	7.67	2.86	3.88	3.57	6.12	8.01	6.73	8.59	7.34	5.77	5.43	3.32	3.77	2.42	2.13	3.61	5.52	7.83	8.62	8.23	7.15	4.4	3.13	6.7	4.12	5.68		alpha-Man-IIa	4.08	3.83333	7.09333	3.44667	6.138		alpha-Man-IIa	0.54	0.289113	0.54	0.379976	0.252003	0.131599
alpha-Man-IIb	0.73	0.28	0.74	0.57	0.64	0.77	0.45	0.21	0.46	0.56	0.61	0.36	1.3	0.8	0.7	0.72	1.37	1.2	0.61	0.33	0.43	0.56	0.25	1.34	1.56	0.63	1.03	1.26	1.56	0.63	0.48	1.22	1.75	0.71		alpha-Man-IIb	0.621667	0.441667	1.015	0.586667	1.083		alpha-Man-IIb	1.23	0.0587683	1.23	0.668817	0.284196	0.0186044
alpha-PheRS	42.22	43.96	53.69	41.76	23.16	32.29	38.49	36.02	42.86	36.35	42.4	27.73	61.36	46.38	41.53	48.9	37.64	42.35	51.03	30.33	32.09	38.63	38.26	34.03	53.7	61.18	51.54	48.23	47.42	40.42	34.47	47.57	27.27	50.41		alpha-PheRS	39.5133	37.3083	46.36	37.395	46.221		alpha-PheRS	0.36	0.43801	-0.36	-0.232552	0.193316	0.22899
alpha-Spec	28.77	33.84	33.21	28.32	34.28	37.25	29.95	24.63	28.67	30.32	36.91	27.87	57.86	43.3	55.71	55.47	48.72	53.94	34.48	29.85	30.63	32.19	26.05	42.26	58.79	48.32	53.84	47.63	56.13	37.52	33.04	57.47	44.12	49.29		alpha-Spec	32.6117	29.725	52.5	32.5767	48.615		alpha-Spec	0.66	0.218062	0.66	0.256045	0.152251	0.0926213
alpha4GT1	5.26	7.74	8.05	2.54	8.17	5.79	7.4	4.88	10.79	7.91	7.84	5.23	14.12	12.94	15.69	16.05	11.88	11.29	7.29	6.72	6.31	5.2	3.87	8.94	12.46	14.62	12.45	13.36	15.4	5.94	6.02	13.05	6.98	8.22		alpha4GT1	6.25833	7.34167	13.6617	6.38833	10.85		alpha4GT1	1.14	0.072032	1.14	0.350408	0.154902	0.0236893
alpha4GT2	0.69	1.16	0.83	0.86	1.16	1.16	0.58	0.44	1.25	0.87	1.36	0.83	1.1	2.29	2.92	2.67	2.08	1.71	1.07	0.78	0.76	0.48	0.47	1.09	0.99	1.92	2.81	2.98	4.22	0.63	0.62	1.06	0.67	0.76		alpha4GT2	0.976667	0.888333	2.12833	0.775	1.666		alpha4GT2	2	0.0100779	2	0.716269	0.235229	0.00232688
alphaCOP	34.01	40.98	43.37	34.15	40.63	47.3	31.87	28.19	35.2	40.75	40.56	29.8	56.5	43.26	54.02	46.02	52.74	58.96	41.86	36.76	33.94	30.97	24.75	35.46	63.02	57.19	48.27	46.93	46.92	40.96	34.43	66.11	52.67	44.36		alphaCOP	40.0733	34.395	51.9167	33.9567	50.086		alphaCOP	0.03	0.923884	0.03	0.0370788	0.152132	0.807442
alphagamma-element:CR32865	0.74	1.05	0.59	0.89	1.4	1.59	0.77	0.33	1.04	0.59	1.05	0.76	9.85	18.52	18.89	28.85	15.44	13.08	1.7	0.74	1.48	0.72	1.04	1.4	4.64	1.41	0.22	1.22	0.63	4.51	0.49	1.21	6.3	2.45		alphagamma-element:CR32865	1.04333	0.756667	17.4383	1.18	2.308		alphagamma-element:CR32865	43.97	1.08015e-44	43.97	3.91461	0.271174	3.08258e-47
alphaKap4	0.13	0	0	0	0.09	0	0	0	0.83	0.13	0	0	0	0.3	0	0.11	0.32	0.48	0	0	0	0	0	0	0	0	0	0.57	0.07	0	0	0	0	0		alphaKap4	0.0366667	0.16	0.201667	0	0.064		alphaKap4	0	0.994798	0	0.0222564	1.21073	0.985334
alphaSnap	13.46	17.35	14.49	13.8	15.65	14.36	16.29	11.26	18.1	16.16	18.82	13.87	19.72	25.32	31.84	27.57	22.76	27.26	16.45	14.79	11.44	11.31	10.1	12.4	23.11	30.45	26.02	23.73	24.97	14.94	12.01	24.45	18.97	17.48		alphaSnap	14.8517	15.75	25.745	12.7483	21.613		alphaSnap	0.46	0.346008	0.46	0.142096	0.10274	0.166644
alphaTry	392.37	58.25	24.41	207.67	19.8	345.94	180.23	234.18	262.95	337.95	143.96	23.68	21.91	24.31	6.42	11.43	46.46	12.18	1.74	283.73	412.7	204	426.72	66.19	129.64	8.59	5.23	1.66	2.67	32.15	4.5	6.43	2.26	8.55		alphaTry	174.74	197.158	20.4517	232.513	20.168		alphaTry	9.09	8.15927e-10	-9.09	-3.64914	0.546903	2.51703e-11
alphaTub67C	0.59	0.54	0.38	0.55	0.7	0.66	0.77	0.47	0.22	0.57	1.31	0.37	1.7	1.41	1.9	1.85	1.23	1.37	2.5	0.49	0.62	1.28	0.12	1.45	0.91	2.04	0.53	2.46	0.98	1.07	0.95	0.56	2.46	0		alphaTub67C	0.57	0.618333	1.57667	1.07667	1.196		alphaTub67C	0.83	0.148903	0.83	0.759792	0.399669	0.0572951
alphaTub84B	1130.46	1369.92	1227.44	1155.18	1385.22	1520.15	1163.65	830.44	881.7	1136.92	1317.76	1139.92	2157.39	2194.28	3117.6	2470.16	2533.25	3292.6	1132.09	1090.05	868.89	963.71	803.49	1999.24	2404.9	2599.97	2749.13	2396.7	3016.9	1568	1414.06	3111.05	1792.01	2102.63		alphaTub84B	1298.06	1078.4	2627.55	1142.91	2315.53		alphaTub84B	3.15	0.000701533	3.15	0.689263	0.178103	0.000108827
alphaTub84D	99.41	94.04	109.75	91.45	82.91	121.77	84.07	53.83	98.68	72.65	105.86	60.32	114.82	102.84	122.4	107.29	96.83	123.19	98	61.79	55.73	90.03	49.02	76.12	128.22	113.85	104.76	95.73	128.68	81.2	67.11	115.88	96.38	80.5		alphaTub84D	99.8883	79.235	111.228	71.7817	101.231		alphaTub84D	0.05	0.89074	-0.05	-0.0451263	0.135224	0.738594
alphaTub85E	26.44	45.98	37.55	24.61	38.77	22.75	31.2	22.78	26.57	48.21	31.6	36.84	521.43	2262.63	3000.13	2856.36	1403.55	1846.21	46.96	40.25	31.42	27.12	32.44	1237.82	631.72	4072.72	4324.16	3448.94	3235.04	321.33	806.26	2346.4	586.22	1544.7		alphaTub85E	32.6833	32.8667	1981.72	236.002	2131.75		alphaTub85E	48.44	3.6167e-49	48.44	5.18859	0.34244	7.3725e-52
Alr	24.83	26.93	24.51	22.51	28.59	28.37	24.37	18.16	23.63	22.93	27.83	22.32	32.62	45.49	44.84	41.15	50.43	53.25	27.83	23.35	20.95	17.55	16.34	33.02	46.02	59.78	52.09	38.87	46.86	25.81	24.33	52.6	31.54	39.07		Alr	25.9567	23.2067	44.63	23.1733	41.697		Alr	1.83	0.0146799	1.83	0.363435	0.124957	0.00363183
alrm	0	0	0.14	0.55	1.11	1.44	0.76	0.14	0.16	0.97	0	0	0	0	0	0	0.04	0.25	0	0	0.76	1.89	0.68	2.09	0.04	0	0	0.05	0	0.04	0.29	0.17	0	0		alrm	0.54	0.338333	0.0483333	0.903333	0.059		alrm	0.82	0.149743	-0.82	-2.25271	1.1871	0.0577422
Als2	1.23	1.09	0.66	0.83	1.67	0.66	0.84	0.77	2.45	0.91	1.07	0.85	1.4	1.85	2.06	1.98	1.85	1.97	1.07	1.42	0.77	1.18	0.76	1	1.38	1.68	1.54	2.01	1.52	1.39	1.35	1.66	1.39	1.68		Als2	1.02333	1.14833	1.85167	1.03333	1.56		Als2	0.17	0.681756	0.17	0.170779	0.223094	0.443973
alt	58.83	83.39	93.83	61.34	86.59	105.38	57.71	50.17	75.45	77.34	89.56	75.68	123.98	139.42	168.48	149.82	112.86	112.42	106.52	56.85	58.34	63.37	53.8	93.26	118.25	90.14	132.77	115.21	150.2	77.75	70.46	145.3	76.96	93.67		alt	81.56	70.985	134.497	72.0233	107.071		alt	1.28	0.0529701	1.28	0.355806	0.148281	0.0164162
aly	1.89	0.29	0.46	0.67	2.58	0.65	0.59	0	4.77	0.11	0.67	0.11	0	1.43	0	0.28	2.16	1.62	0.31	2.37	0	0.65	0	0.07	1.24	0	1.28	2.9	0.48	2.64	0.78	2.23	0	0.73		aly	1.09	1.04167	0.915	0.566667	1.228		aly	0.06	0.870212	-0.06	-0.404666	1.06623	0.704294
Ama	11.4	6.39	12.56	4.72	20.79	21.16	8.52	3.86	14.74	10.52	15.13	21.98	10.99	438.01	367.67	267.43	211.87	272.16	9.29	4.19	16.15	8.14	4.61	13.68	11.77	231.05	226.29	105.62	181.64	8.39	4.45	14.4	10.68	8.47		Ama	12.8367	12.4583	261.355	9.34333	80.276		Ama	8.37	4.2749e-09	8.37	3.59999	0.562576	1.56275e-10
amd	0.73	0.55	0.88	0.92	2.23	0.82	0.76	0.84	0.29	1.86	1.24	2.14	0.06	0.04	0.31	0.04	0.51	0.77	0.76	0.72	0.99	1.11	0.37	1.4	0.3	0	0.24	0.41	0.64	0.68	1.23	0.1	0.57	0.22		amd	1.02167	1.18833	0.288333	0.891667	0.439		amd	2.73	0.0018781	-2.73	-2.50323	0.697973	0.000335243
amn	1.18	2.01	1.54	0.64	1.15	1.71	0.72	1.43	2.79	1.56	1.98	1.24	3.02	1.58	1.84	3.35	2.44	2.05	2.34	1.29	0.79	0.96	1.01	1.7	3.16	1.7	2.17	2.7	2.55	1.73	1.65	2.65	1.64	1.33		amn	1.37167	1.62	2.38	1.34833	2.128		amn	0.02	0.964075	0.02	0.0329646	0.292417	0.910243
Amnionless	0.65	0.97	0.65	1.13	1.71	0.85	0.59	0.54	0.4	0.68	0.91	1.15	0.42	0.47	0	0.33	0.18	1.01	0.79	0.16	0.38	0.15	1.16	0.91	0.23	0.12	0	0.31	0	0.74	1.71	0.03	0	0.46		Amnionless	0.993333	0.711667	0.401667	0.591667	0.36		Amnionless	1.17	0.0678972	-1.17	-1.39361	0.60915	0.0221495
amon	0.38	0.16	0.19	0.38	0.48	0.44	0.21	0.37	0.1	0.27	0.29	0.03	0.12	0.36	0.18	0.15	0.38	0.21	0.11	0.35	0.69	0.54	0.33	0.52	0.23	0.17	0.3	0.47	0.79	0.27	0.1	0.18	0.49	0.31		amon	0.338333	0.211667	0.233333	0.423333	0.331		amon	0.21	0.60989	-0.21	-0.466845	0.522278	0.371396
amos	0	0	0	0	0	0	0	0	0	0	0	0	0	0	0	0	0	0	0	0	0	0	0	0	0	0	0	0	0	0	0	0	0	0		amos	0	0	0	0	0		amos	0	NA	0	NA	NA	NA
AMPdeam	6.19	4.82	3.87	6.55	6.46	7.44	3.62	8.24	6.89	7.3	5.88	7.46	6.73	7.29	4.92	5.46	7.07	6.97	3.78	6.36	5.42	5.67	7.79	5.09	6.92	5.65	5.43	8.03	5.95	6.14	5	6.38	6.19	4.61		AMPdeam	5.88833	6.565	6.40667	5.685	6.03		AMPdeam	1.29	0.0517277	-1.29	-0.624718	0.259188	0.0159399
Amph	7.95	5.8	7.31	10.22	4.99	7.71	6.79	6.01	4.13	5.82	5.59	7.78	2.89	2.62	1.75	1.65	2.3	2.45	6.82	3.84	5.5	9.6	8.01	7.26	3.84	1.04	1.98	2.96	1.72	5.35	9.6	2.61	2.79	5.23		Amph	7.33	6.02	2.27667	6.83833	3.712		Amph	9.71	1.96495e-10	-9.71	-1.98379	0.287709	5.38068e-12
AMPKalpha	16.14	19.58	15.07	14.17	18.7	20.88	14.6	14.62	15.9	14.62	16.92	16.39	16.75	21.87	26.29	23.31	17.7	24.35	16.36	14.77	15.06	14.13	14.42	17.1	19.73	28.02	20.46	18.5	22.23	12.94	14.72	18.85	17.4	13.84		AMPKalpha	17.4233	15.5083	21.7117	15.3067	18.669		AMPKalpha	0.17	0.682466	-0.17	-0.110037	0.143968	0.44468
Amt	0	0	0	0	0	0	0	0	0	0	0	0	0	0	0	0	0	0.09	0	0	0	0	0	0	0.37	0	0	0	0	0	0	0	0	0		Amt	0	0	0.015	0	0.037		Amt	0	NA	0	0.17383	1.34851	0.897433
Amun	18.88	24.9	26.79	19.19	46.86	29.61	25.58	21.72	31.44	27.95	26.66	19.14	38.07	48.84	70.94	55.35	52.99	49.27	38.77	15.67	23.9	23.42	19.6	51.15	37.59	47.55	63.26	64.36	77.32	29.34	39.34	67.79	36.05	45.22		Amun	27.705	25.415	52.5767	28.7517	50.782		Amun	3.58	0.000261553	3.58	0.473102	0.114397	3.54021e-05
amx	3.43	6.92	4.38	2.36	6.2	2.29	1.86	5.52	7.71	1.6	4.47	2.43	12.58	9.11	11.33	14.55	8.69	10.27	5.32	4.67	5.24	3.03	4.35	5.66	8.68	13.41	12.77	13.47	12.67	5.81	6.04	7.5	3.87	11.27		amx	4.26333	3.93167	11.0883	4.71167	9.549		amx	1.52	0.0304931	1.52	0.942526	0.35851	0.00856343
Amy-d	5.43	15.88	1.47	8.07	3.2	0.29	1.55	13.4	199.07	5.33	4.14	0.08	0.89	2.72	5.83	4.12	0.63	0.95	0	61.37	11.84	20.48	4.34	2.01	1.47	0.21	1	1.22	2	32.98	17.65	1.35	0	5.67		Amy-d	5.72333	37.2617	2.52333	16.6733	6.355		Amy-d	0	NA	0	-3.56971	0.957378	NA
Amy-p	22.58	67.27	3.69	21.22	1.58	2.79	1.17	23.68	38.84	1.36	7.07	0.23	3.29	2.9	1.47	2.03	2.58	1.82	0.67	92.81	7.02	51.19	7.49	3	1.68	0.41	0.67	0.85	1.51	37.57	28.42	3.32	1.94	2.42		Amy-p	19.855	12.0583	2.34833	27.03	7.879		Amy-p	2.21	0.00610537	-2.21	-2.5491	0.793003	0.00130678
Amyrel	5.44	12.93	1.43	4.95	0.46	0.19	0.03	8.25	0.63	0.29	0.93	0	0	0	0.1	1.16	0	1.16	0.23	10.82	3.15	16.18	1.33	1.62	0.74	0.21	0	0	0	5.57	5.89	0.06	0.81	0.65		Amyrel	4.23333	1.68833	0.403333	5.555	1.393		Amyrel	0	NA	0	-2.18671	1.18007	NA
ana	0.24	0	0.26	0.43	0.52	0.44	0.32	0.19	0.24	0.43	0.22	0.03	0.19	0.79	0.54	0.19	0.5	0.73	0.16	0.11	0.29	0.37	0.14	0.57	0.25	0.44	0.66	1.67	1.31	0.32	0.11	0.25	1.27	0.13		ana	0.315	0.238333	0.49	0.273333	0.641		ana	0.21	0.618474	0.21	0.446343	0.510386	0.381834
ana1	1.18	2.3	2.06	1.43	4.59	2.05	1.74	1.03	5	2.3	2.15	1.85	1.72	5.5	3.35	4.43	3.98	3.86	2.15	1.96	1.55	2.34	0.9	2.06	2.5	2.57	3.11	4.01	4.61	1.76	1.16	4.74	1.03	2.6		ana1	2.26833	2.345	3.80667	1.82667	2.809		ana1	0.12	0.751652	0.12	0.18092	0.284435	0.524731
ana2	16.02	22.6	20.33	15.57	27.13	25.86	17.27	11.5	23.56	18.84	21.93	17.29	30.81	25.46	36.46	29.55	33.97	37.59	23.46	18.71	15.51	14.56	13.08	21.97	37.34	26.13	26.11	26.91	28.94	20.72	15.69	41.58	28.07	24.04		ana2	21.2517	18.3983	32.3067	17.8817	27.553		ana2	0.84	0.145183	0.84	0.265641	0.138625	0.0553327
ana3	0.97	1.05	0.92	0.62	2.04	1	0.66	0.66	4.87	0.93	1.35	0.78	1.17	2.21	1.69	2.75	1.93	2.29	1.69	0.82	0.87	0.73	0.06	0.96	1.28	2.57	3.29	2.98	1.66	0.78	0.86	1.25	1.63	1.22		ana3	1.1	1.54167	2.00667	0.855	1.752		ana3	0.02	0.963719	-0.02	-0.0477063	0.413652	0.908184
Ance	94.69	74.4	57.37	118.69	107.74	100.41	116.93	149.23	140.01	92.44	100.25	44.56	61.45	152.71	181.59	160.14	100.62	99.89	59.32	170.94	113.5	104.12	136.68	91.96	68.29	118.37	120.46	103.1	116.76	103.85	83.68	94.55	43.86	172.41		Ance	92.2167	107.237	126.067	112.753	102.533		Ance	0.37	0.425626	-0.37	-0.377444	0.308293	0.220838
Ance-2	0.04	0.48	0	0.31	0.98	0.39	0.18	0.31	0.43	0.56	0.43	0.22	0.5	0.85	0.13	1.28	0	0.71	0	0.33	0.42	0.35	0.05	0.52	0.56	1.01	1.14	0.67	1.73	0.31	0.06	0.75	0.95	0.44		Ance-2	0.366667	0.355	0.578333	0.278333	0.762		Ance-2	0.03	0.935906	0.03	0.14096	0.665226	0.832187
Ance-3	53.98	53.02	83.72	82.68	63.33	33.59	77.53	53.8	14.89	59.77	20.04	98.45	10.78	4.35	4.85	5.52	3.65	19.73	82.38	48.06	56.73	54.89	50.31	71.76	12.47	6.09	5.39	4.49	5.22	64.63	97.97	11.06	6.15	48.78		Ance-3	61.72	54.08	8.14667	60.6883	26.225		Ance-3	6.55	2.83371e-07	-6.55	-3.23158	0.571702	1.58081e-08
Ance-4	31.11	24.91	31.63	24.85	15.08	18.61	40.42	13.81	25.42	14.89	38.51	15.13	14.03	20.68	4.89	9.48	19.82	10.42	21.63	13.68	9.1	22.44	17.74	14.97	18.86	16.01	7.85	11.36	13.97	18.54	32.79	12.77	2.01	13.56		Ance-4	24.365	24.6967	13.22	16.5933	14.772		Ance-4	2.69	0.00202736	-2.69	-1.40172	0.393404	0.000366573
Ance-5	217.98	342.01	339.44	99.83	389.44	439.19	237.15	104.66	323.87	241.82	465.44	254.62	214.62	364.96	538.57	378.36	347.26	419.67	577.09	186.86	177.44	148.16	116.71	141.54	241.38	321.63	364.3	256.8	322.85	103.29	103.18	372.9	190.87	165.55		Ance-5	304.648	271.26	377.24	224.633	244.275		Ance-5	0.04	0.920212	-0.04	-0.0631145	0.247944	0.799069
Andorra	0.16	0	0	0	0.16	0	0.11	0	1.01	0.21	0	0	0	0.66	0.08	0.45	0.3	0.71	0	0.12	0	0	0	0	0	0	0	0.85	0	0	0	0.31	0	0		Andorra	0.0533333	0.221667	0.366667	0.02	0.116		Andorra	0.04	0.922058	0.04	0.246067	0.990646	0.803832
angel	6.22	6.46	7.44	5.03	7.88	7.62	6.2	3.84	7.26	5.65	9.22	5.2	9.89	7.55	13.16	9.58	9.64	9.96	7.21	4.71	4.12	4.76	5.32	9.31	12.68	9.15	11.76	6.59	12.78	6.66	5.76	8.92	7.77	7.19		angel	6.775	6.22833	9.96333	5.905	8.926		angel	0.14	0.722198	0.14	0.129481	0.187508	0.489857
Ank	6.9	9.78	9.28	7.16	12.06	7.63	8.46	8.09	10.49	9.51	9.83	8.61	15.45	21.03	24.04	25.17	20.69	18.27	12.17	8.81	8.68	6.93	7.32	15.52	16.65	20.99	28.98	26.86	25.71	11.77	10.99	21.49	16.09	16.32		Ank	8.80167	9.165	20.775	9.905	19.585		Ank	7.46	3.4303e-08	7.46	0.595202	0.0985347	1.53602e-09
Ank2	0.21	0.16	0.28	0.44	0.58	0.55	0.31	0.21	0.18	0.53	0.18	0.17	0.07	0.17	0.1	0.22	0.2	0.45	0.13	0.1	0.49	0.44	0.35	0.67	0.17	0.08	0.11	0.24	0.22	0.15	0.3	0.08	0.33	0.11		Ank2	0.37	0.263333	0.201667	0.363333	0.179		Ank2	1.1	0.0793828	-1.1	-0.994245	0.448564	0.0266569
Ankle2	3.26	4.61	3.57	2.75	6.71	4.37	2.65	2.49	6.06	5.85	4.21	3.75	4.71	10.38	9.67	9.46	9.92	9.71	5.96	3.68	3.82	2.73	2.55	6.48	6.47	10.27	9.24	8.5	11.45	4.63	2.86	8.77	3.82	6.33		Ankle2	4.21167	4.16833	8.975	4.20333	7.234		Ankle2	1.61	0.0244119	1.61	0.549263	0.202205	0.00660018
anne	11.89	13.76	9.57	12.79	15.07	12.52	9.91	10.89	13.24	11.66	13.69	11.43	8.6	13.78	17.2	15.35	15.78	12.36	13.04	10.7	14.18	13.94	12.66	12.36	11.35	11.25	17.59	16.19	15.09	12.11	9.4	13.97	7.58	11.41		anne	12.6	11.8033	13.845	12.8133	12.594		anne	1.71	0.019445	-1.71	-0.360795	0.128722	0.00506441
Anp	0	0.53	0	0	0	0	0	0	0	0	0	0	0	0	1.06	0	0	0	0.57	0	0	0	0	0	0	0	0	0	0	0	0	0	0	0		Anp	0.0883333	0	0.176667	0.095	0		Anp	0	NA	0	0.58999	1.34851	0.66174
Ant2	326.73	295.01	268.97	357.06	206.03	289.43	303.77	197.66	133.48	210.2	237.19	219.9	176.93	86.81	127.96	108.58	108.67	138.85	199.2	181.82	178.27	283.99	248.51	187.32	193.99	101.07	108.84	100.25	101	201.38	222.27	167.07	130.75	192.83		Ant2	290.538	217.033	124.633	213.185	151.945		Ant2	4.29	5.16331e-05	-4.29	-1.3652	0.300536	5.5573e-06
antdh	1	0.33	0.61	0.99	1.71	1.2	2.84	2.86	1.1	1.3	1.34	0.89	3.94	2.88	2.24	3.62	3.07	1.97	2.79	3.2	0.98	2.74	0.95	1.39	2.16	3.34	5	1.56	2.9	1.9	0.56	1.92	7.24	0.34		antdh	0.973333	1.72167	2.95333	2.00833	2.692		antdh	0.05	0.892913	0.05	0.142932	0.436025	0.743057
Antp	0.64	0.3	0.55	1.05	1.42	1.26	0.59	0.56	0.47	0.96	0.63	0.25	0.73	0.81	0.3	0.3	0.63	0.57	0.31	0.23	0.82	1.1	0.68	1.22	0.55	0.2	0.58	0.94	0.82	0.61	0.4	0.42	0.82	0.29		Antp	0.87	0.576667	0.556667	0.726667	0.563		Antp	0.59	0.259081	-0.59	-0.582288	0.369306	0.114863
antr	1.33	2.67	2.73	0.88	4.31	2.28	1.78	2.12	2.44	1.5	2.18	1.58	2.27	1.35	4.11	4.4	6.96	4.38	6.26	1.67	1.5	0.61	1.16	2.94	1.66	7.57	4.58	2.62	3.77	0.52	0	7	0	1.51		antr	2.36667	1.93333	3.91167	2.35667	2.923		antr	0.36	0.440327	0.36	0.43054	0.359016	0.230441
AnxB9	89.2	114.7	99.69	73.21	99.21	95.27	81.45	92.01	105.67	109.07	112.08	106.83	301.09	344.59	419.88	422.47	334.28	368.08	113.65	109.16	86.84	77.83	74.07	246.59	376.91	515.71	488.21	450.89	428.55	185.85	200.5	414.52	281.59	321.18		AnxB9	95.2133	101.185	365.065	118.023	366.391		AnxB9	21.01	9.73642e-22	21.01	1.25977	0.125151	7.8066e-24
AnxB10	9.25	17.29	9.34	7.85	17.17	11.12	8.38	10.64	16.96	17.99	11.92	13.56	21.09	55.89	67.69	61.27	31.21	37.82	7.85	16.61	15.23	7.06	6.3	16.47	22.61	71.8	60.16	51.98	59.16	13.54	18.68	38.38	14.71	21.7		AnxB10	12.0033	13.2417	45.8283	11.5867	37.272		AnxB10	4.07	8.52649e-05	4.07	1.18169	0.267377	9.89014e-06
AnxB11	22.86	39.34	33.91	13.46	34.77	30.01	21.1	21.87	44.57	32.04	39.82	27.88	93.15	75.7	104.25	106.81	79.54	87.38	46.06	29.63	24.8	17.47	15.82	52.49	97.05	112.7	87.36	85.03	90.99	43.21	43.95	103.58	86.34	71.94		AnxB11	29.0583	31.2133	91.1383	31.045	82.215		AnxB11	9.36	4.33724e-10	9.36	1.0162	0.150067	1.27315e-11
aop	7.84	9.42	9.25	5.17	9.86	10.71	7.33	5.01	10.03	8.82	12.99	6.94	11.01	12.84	16.13	13.89	13.7	13.72	11.55	8.29	6.91	6.6	4.51	10.41	11.23	10.12	15.4	14.15	15.98	7.02	6.41	15.93	7.3	9.95		aop	8.70833	8.52	13.5483	8.045	11.349		aop	0.26	0.550185	0.26	0.131653	0.130885	0.314477
aos	0.53	0.33	0.43	0.47	0.53	0.48	0.38	0.33	0.36	0.51	0.95	0.14	2	3.88	6.93	6.01	9.89	10.19	0.22	0.42	0.41	0.35	0.42	12.15	2.8	9.39	13.24	12.86	15.79	1.57	8.42	19.47	5.25	13.63		aos	0.461667	0.445	6.48333	2.32833	10.242		aos	12.35	4.50655e-13	12.35	3.22167	0.41501	8.30304e-15
Aos1	57.16	69.25	73.4	49.12	76.15	74.59	56.56	45.12	82.61	72.49	74.49	48.26	87.84	84.49	103.75	95.88	88.24	98.86	84.84	58.11	55.16	48.47	36.11	73.27	108.55	88.84	87.69	87	82.92	62.03	47.84	104.71	71.96	62.53		Aos1	66.6117	63.255	93.1767	59.3267	80.407		Aos1	0.02	0.953415	0.02	0.0148133	0.0960949	0.877489
AOX1	25.88	16.59	9.83	22.89	8.66	25.55	16.04	21.96	12.13	12.24	17.73	7.57	10.18	6.11	6.37	7.99	9.23	7.47	7.63	24.48	11.44	18.97	16.71	5.8	7.97	6.76	7.07	7.6	6.81	12.21	9.39	9.47	6.47	11.14		AOX1	18.2333	14.6117	7.89167	14.1717	8.489		AOX1	4.55	2.8317e-05	-4.55	-1.45647	0.310983	2.82073e-06
AOX2	3.67	3.19	5.17	5.7	4.75	3.33	3.03	4.9	1.49	5.52	1.07	4.55	0.96	0.27	0	0.22	0.31	1.62	4.09	3.26	4.86	3.51	3.54	3.43	0.72	0.22	0	0.61	0.05	2.33	3.53	0.63	0	2.46		AOX2	4.30167	3.42667	0.563333	3.78167	1.055		AOX2	3.33	0.000464449	-3.33	-2.97043	0.745955	6.83245e-05
AOX3	7.05	5.82	6.5	6.24	7.83	6.46	6.64	4.01	8.21	5.16	4.82	4.89	4.43	5.71	4.85	4.36	7.03	3.79	6.41	4	5.29	7.55	4.63	5.43	2.58	5.46	4.55	5.6	5.78	2.68	5.42	5.41	1.91	3.22		AOX3	6.65	5.62167	5.02833	5.55167	4.261		AOX3	2.93	0.00118336	-2.93	-0.714979	0.192164	0.000198687
AOX4	0	0	0	0.03	0	0	0.03	0	0	0	0	0	0	0.04	0	0	0	0	0	0.03	0	0	0	0.04	0	0	0	0	0	0.04	0	0	0	0		AOX4	0.005	0.005	0.00666667	0.0116667	0.004		AOX4	0	NA	0	-0.0342504	1.34851	0.979737
ap	0.73	0.36	0.64	0.7	1.32	1	0.51	0.47	1.21	0.66	1.1	0.65	0.69	1.16	0.27	0.45	1.17	1.37	0.44	0.47	0.39	0.68	0.42	1.12	0.84	0.16	0.31	0.91	0.46	1.42	0.65	0.83	1.09	0.89		ap	0.791667	0.766667	0.851667	0.586667	0.756		ap	0.23	0.590746	-0.23	-0.345096	0.370902	0.352152
AP-1-2beta	17.01	25.57	24.66	15.72	25.77	24.6	18.13	14.88	29.07	20.36	26.25	19.59	44.07	48.63	54.66	54.97	49.65	58.73	25.53	24.14	19.56	15.74	12.69	28.22	46.78	58.64	46.3	50.88	45.61	23.64	17.69	54.96	35.59	35.35		AP-1-2beta	22.2217	21.38	51.785	20.98	41.544		AP-1-2beta	15.67	2.12929e-16	15.67	0.72793	0.0834505	2.71169e-18
AP-1gamma	9.46	9.77	11.31	10.94	15.08	11.88	8.39	10.21	11.83	10.06	10.69	8.98	17.13	15.46	20.26	15.77	15.97	13.15	11.37	9.06	8.35	10.26	10.64	14.1	15.65	13.36	16.93	17.83	18.68	12.43	12.57	18.86	12.81	14.2		AP-1gamma	11.4067	10.0267	16.29	10.63	15.332		AP-1gamma	0.2	0.627417	0.2	0.130306	0.151452	0.389579
AP-1mu	24.89	27.14	22.79	25.3	23.72	24.73	18.59	16.16	20.26	21.85	20.17	20.22	24.92	27.87	27.78	26.68	20.8	29.28	21.59	19.24	16.86	20.04	20.28	18.26	25.68	28.8	32.64	26.56	23.79	22.12	19.77	27.13	16.52	23.51		AP-1mu	24.7617	19.5417	26.2217	19.3783	24.652		AP-1mu	0.28	0.519944	-0.28	-0.152652	0.144347	0.290267
AP-1sigma	32.56	31.72	29.46	30.78	27.37	36.51	26.13	19.82	23.54	25.27	30.21	21.36	47.59	32.93	48.87	47.02	48.73	43.38	26.65	22.12	20.56	23.17	19.5	33.6	47.6	44.84	51.84	44.71	55.55	28.44	28.16	54.4	42.31	36.42		AP-1sigma	31.4	24.3883	44.7533	24.2667	43.427		AP-1sigma	0.85	0.142164	0.85	0.309625	0.160631	0.0539111
AP-2alpha	17.14	32.73	29.44	13.97	36.21	28.15	22.01	16.16	31.35	25.38	31.48	22.26	40.55	53.53	69.81	65.6	50.71	49.05	38.21	18.8	18.6	16.71	12.24	30.45	38.21	40.23	56.88	55.02	60.96	21.64	21.39	58.02	32.99	32.91		AP-2alpha	26.2733	24.7733	54.875	22.5017	41.825		AP-2alpha	5.82	1.50657e-06	5.82	0.58963	0.110808	1.03086e-07
AP-2mu	18.86	36.72	30.4	12.54	40.99	30.79	18.91	21.29	40.88	22.58	32.99	26.85	40.19	60.05	84.8	69.11	58.12	64.84	41.74	25.46	23.02	17.93	14.35	32.57	53.67	61.81	51.07	56.04	51.06	23.14	24.32	68.6	30.3	32.36		AP-2mu	28.3833	27.25	62.8517	25.845	45.237		AP-2mu	3.65	0.000225928	3.65	0.645191	0.15458	2.99507e-05
AP-2sigma	109.97	135.35	137.61	66.87	157.16	121.17	95.12	72.71	158.98	106.4	150.73	111.85	205.54	273.92	349.42	297.83	239.38	276.84	174.66	103.28	94.42	73.1	71.16	157.95	250.7	398.15	280.4	264.03	267.4	124.44	120.4	269.66	189.46	199		AP-2sigma	121.355	115.965	273.822	112.428	236.364		AP-2sigma	6.43	3.67413e-07	6.43	0.690043	0.123166	2.11206e-08
Apc	1.52	1.82	1.79	1.63	2.59	1.69	1.55	1.65	3.07	2.2	2.13	1.8	4.29	10.12	10.04	11.82	7.12	8.26	2.1	1.87	1.78	1.37	2.22	7.18	6.76	14.07	16.84	15.1	15.71	3.13	4.28	14.13	5.6	9.43		Apc	1.84	2.06667	8.60833	2.75333	10.505		Apc	12.94	1.14467e-13	12.94	1.48092	0.186354	1.91336e-15
Apc2	5.29	5.8	5.54	3.8	6.49	4.47	4.31	3.92	7	4.63	5.22	3.86	6.35	15.24	13.17	11.14	11.23	15.21	6.28	4.84	4.63	4.38	3.36	6.35	8.7	13.87	13.87	10.4	10.57	5.19	4.75	8.73	5.95	7.5		Apc2	5.23167	4.82333	12.0567	4.97333	8.953		Apc2	4.41	3.85248e-05	4.41	0.754299	0.163581	4.00404e-06
APC4	1.68	1.87	2.1	1.98	3.6	3.06	0.37	1.5	2.5	1.82	2.42	1.33	4.14	4.57	4.18	4.39	3.08	3.91	2.34	2.47	1.97	1.83	1	1.89	1.41	3.45	2.52	2.67	5	2.05	1.27	3.23	2.65	2.39		APC4	2.38167	1.65667	4.045	1.91667	2.664		APC4	1.27	0.0531682	1.27	0.75737	0.315865	0.0164956
APC7	0.31	0.26	0.12	0.17	0	0.3	0.08	0.05	0.09	0.2	0.39	0.25	0	0.36	0.41	0.19	0.17	0.19	0.62	0.04	0.39	0	0.47	0.48	0.11	0.39	0	0.75	0.18	0.35	0.38	0	0	0.34		APC7	0.193333	0.176667	0.22	0.333333	0.25		APC7	0.05	0.896366	-0.05	-0.208714	0.657519	0.75092
APC10	11.86	15.81	10.06	7.16	14.59	10.12	11.26	12.12	22.89	13.64	15.09	10.36	28.47	26.2	20.46	27.56	23.98	21.71	15.52	11.77	12.34	9.98	8.33	10.54	22.51	27.93	22.38	19.81	30.86	12.41	9.51	23.48	18.89	21.56		APC10	11.6	14.2267	24.73	11.4133	20.934		APC10	0.53	0.292735	0.53	0.260789	0.173929	0.133771
ApepP	22.85	26.61	22.99	25.51	20.45	14.79	21.69	25.09	36.4	16.33	25.91	14.6	20.86	23.55	20.98	28.64	20.97	17.62	25.56	26.22	17.77	23.98	24.57	15.49	19.92	26.44	25.24	21.72	23.74	24.08	16.8	23.73	20.12	30.03		ApepP	22.2	23.3367	22.1033	22.265	23.182		ApepP	2.16	0.00695519	-2.16	-0.624339	0.196893	0.00151939
Apf	23.69	29.85	20.77	21.27	39.28	24.77	20.16	19.41	29.88	21.37	22.73	26.26	17.9	31.52	38.41	35.59	30.36	34.03	31.59	22.77	19.23	26.02	20.27	24.68	26.53	30.27	27.65	37.78	37.63	20.75	17.05	32.35	8.99	23.86		Apf	26.605	23.3017	31.3017	24.0933	26.286		Apf	0.23	0.587943	-0.23	-0.146378	0.156351	0.349162
aph-1	21.43	30.64	30.99	18.33	40.03	29.99	20.04	20.4	44.57	28.61	33.68	28.37	39.46	72.07	57.47	66.19	58.37	71.33	36.45	28.35	29.78	17.96	19.9	34.98	51.03	80.1	64.94	75.83	71.23	25.78	32.01	59.72	33.67	57.61		aph-1	28.5683	29.2783	60.815	27.9033	55.192		aph-1	2.55	0.00284581	2.55	0.503673	0.145585	0.000540854
aPKC	2.89	2.8	2.52	3.04	4.93	4.37	3.34	3.07	3.08	4.48	3.87	2.81	4.31	5.38	5.72	7.37	4.82	4.67	2.76	3.81	3.64	3.52	3.47	4.75	4.2	3.98	7.64	6.69	7.8	3.98	3.18	6.12	5.46	5.35		aPKC	3.425	3.44167	5.37833	3.65833	5.44		aPKC	0.05	0.892919	0.05	0.0545	0.166725	0.743754
Aplip1	0.14	0.08	0.16	0.53	1.94	0.72	0.14	0.69	0.97	1.81	0.3	0	1.5	0.31	0.96	1.51	0.24	1.56	0.17	0.23	2.01	0.23	0.4	1.07	1.03	1.14	0	0.18	0.15	0.2	0.24	0.39	0	0.87		Aplip1	0.595	0.651667	1.01333	0.685	0.42		Aplip1	0.02	0.950171	0.02	0.12475	0.760776	0.869749
apolpp	659.71	557.7	591	642.74	359.04	459.96	587.47	355.03	569.36	312.67	590.96	643.79	280.75	329.81	48.17	70.08	401.17	153.84	540.28	464.06	290.12	484.9	503.62	333.01	352.12	178.98	74.41	160.11	154.69	482.67	603.89	188.45	83.97	390.74		apolpp	545.025	509.88	213.97	435.998	267.003		apolpp	2.77	0.00170385	-2.77	-1.7392	0.481142	0.000300666
Apoltp	6.78	8.41	7.82	8.17	2.22	7.82	7.43	4.32	3.16	3.22	7.51	5.2	4.28	1.24	0.51	0.68	2.53	1.53	5.6	4.66	3.25	6.16	6.48	3.2	6.18	0.38	0.58	1	1.46	7.05	6.38	2.15	2.82	3.82		Apoltp	6.87	5.14	1.795	4.89167	3.182		Apoltp	2.91	0.00124233	-2.91	-1.94177	0.523791	0.000209602
app	1.39	1.35	1.6	1.47	1.61	1.48	1.13	0.84	1.52	1.36	1.79	1.16	2.17	2.37	2.5	2.6	2.62	1.88	1.55	1.18	1.13	1.38	1.12	2.05	2.13	1.53	2.89	2.95	3.68	1.78	1.52	2.51	1.91	1.9		app	1.48333	1.3	2.35667	1.40167	2.28		app	1.45	0.0358023	1.45	0.313091	0.122089	0.0103342
APP-BP1	10.92	15.1	11.98	10.42	18.09	10.73	8.5	11.01	32.14	8.85	9.94	10.06	12.55	26.79	19.86	20.34	20	19.68	14.33	12.33	6.77	10.42	6.86	6.53	16.34	19.7	16.57	19.2	14.51	10.16	12.39	17.19	11.66	19.2		APP-BP1	12.8733	13.4167	19.87	9.54	15.692		APP-BP1	0.03	0.943985	0.03	0.0516942	0.278617	0.852807
Appl	0.19	0.29	0.46	0.74	1.91	1.38	0.76	0.86	0.39	1.08	0.28	0.16	0.1	0.26	0.16	0.6	0.32	1.07	0.21	0.13	1.25	1.26	0.79	1.92	0.2	0.08	0.32	0.5	0.21	0.18	0.55	0.2	0.27	0.16		Appl	0.828333	0.588333	0.418333	0.926667	0.267		Appl	0.82	0.150673	-0.82	-1.10156	0.581576	0.0582134
Aprt	59.06	48.93	45.22	60.89	27.81	60.34	50.12	37.95	29.44	29.03	47.12	40.49	27.26	42.03	35.31	29.06	36.72	40.26	26.93	38.91	24.2	47.01	37.17	27.33	43.82	31.98	24.92	34.76	21.74	46.49	47.58	29.68	24.07	34.75		Aprt	50.375	39.025	35.1067	33.5917	33.979		Aprt	2.4	0.00395012	-2.4	-0.759992	0.226393	0.000788037
Aps	39.82	51.36	43.57	34.96	64.7	49.52	39.58	34.3	47.08	52.52	49.05	39.11	47.57	62.08	76.41	66.39	56.95	56.49	48.63	31.95	39.87	33.6	31.95	45.04	42.13	42.68	57.35	54.88	65.44	35.15	34.22	60.5	28.54	35.97		Aps	47.3217	43.6067	60.9817	38.5067	45.686		Aps	0.2	0.627417	-0.2	-0.0921508	0.107132	0.3897
apt	0.79	0.55	0.72	0.77	1.05	0.95	0.65	0.32	0.69	0.84	0.63	0.46	1.21	1.19	1.22	1.4	1.19	1.24	0.63	0.56	0.77	0.86	0.56	1.35	1.06	0.59	1.06	2.15	1.68	0.78	0.88	1.53	1.86	0.84		apt	0.805	0.598333	1.24167	0.788333	1.243		apt	1.77	0.0167955	1.77	0.496759	0.173867	0.00427505
AQP	0.44	1.37	1.51	0.56	1.97	1.04	2.43	1.7	0.76	0.64	0.49	1.62	0.57	0.07	0.22	0	0.27	0.32	1.67	0.65	2	1.48	0.53	3.08	0.14	0.25	0	0.51	0	1.94	2.33	0.09	0	1.26		AQP	1.14833	1.27333	0.241667	1.56833	0.652		AQP	3.71	0.000193238	-3.71	-2.85913	0.678412	2.50394e-05
aqrs	0	0	0	0	0	0	0	0	0	0	0	0	0	0	0	0	0	0	0	0	0	0	0	0	0	0	0	0	0	0	0	0	0	0		aqrs	0	0	0	0	0		aqrs	0	NA	0	NA	NA	NA
ara	0.7	0.16	0.34	1.05	1.7	1.03	0.67	0.66	0.39	1.64	0.29	0.2	0.26	0.55	0.28	0.11	0.43	0.63	0.09	0.18	1.62	0.75	0.71	1.32	0.26	0.08	0.52	0.71	0.55	0.23	0.08	0.19	0.53	0.33		ara	0.83	0.641667	0.376667	0.778333	0.348		ara	1.32	0.0479941	-1.32	-1.31658	0.538663	0.0145186
aralar1	13.81	10.94	10.24	12.93	10.04	13.76	15.53	10.78	7.41	8.88	11.01	11.3	4.87	5.12	4.18	4.49	6.69	4.28	11.43	7.74	8.47	10.61	12.42	7.75	7.05	3.58	4.35	3.17	4.19	5.98	8.96	4.67	3.13	7.38		aralar1	11.9533	10.8183	4.93833	9.73667	5.246		aralar1	8.8	1.60323e-09	-8.8	-1.73203	0.263944	5.30525e-11
Arc1	412.55	546.08	383.45	358.81	526.51	539.95	324.63	598.52	505.6	537.97	613.67	427.95	1297.36	798.55	957.68	943.33	1505.88	1598.35	396.95	1027.5	510.39	435.82	294.79	762.63	1287.9	925.93	1053.71	1132.19	1212.47	715.19	653.89	1427.65	935.09	1031.76		Arc1	461.225	501.39	1183.52	571.347	1037.58		Arc1	1.46	0.034515	1.46	0.664207	0.257455	0.00988287
Arc2	12.86	17.63	7.35	12.44	14	9.62	8.27	15.5	7.9	14.52	9.14	16.35	52.1	37.19	55.78	42.67	62.62	78.09	5.54	25.54	14.75	9.7	7.33	41.48	70.82	58.48	64.66	51.15	62.35	44.98	41.91	79.31	80.46	50.3		Arc2	12.3167	11.9467	54.7417	17.39	60.442		Arc2	4.51	3.12568e-05	4.51	1.53832	0.330034	3.14543e-06
Arc42	24.47	20.65	22.97	23.71	24.27	22.46	24.05	17.62	26.67	21.59	25.48	22.07	22.6	44.04	40.08	37.29	26.22	29.32	28.36	21.64	17.47	20.46	15.87	18.32	32.34	38.78	33.1	37.03	31.81	16.53	20.76	28.14	9.27	20.93		Arc42	23.0883	22.9133	33.2583	20.3533	26.869		Arc42	0.04	0.908006	-0.04	-0.0432175	0.151869	0.775973
Archease	25.61	24.39	28.17	22.25	19.56	25.41	17.6	15.51	15.19	19	27.37	15.41	28.97	23.23	32.1	28.37	28.07	24.76	23.91	20.51	18.21	19.75	11.85	18.03	28.22	30.48	21.49	22.43	22.86	17.49	13.3	25.88	14.5	15.59		Archease	24.2317	18.3467	27.5833	18.71	21.224		Archease	0.02	0.961181	0.02	0.0227416	0.181811	0.900458
Arf51F	42.63	83.7	73.42	33.28	73.66	62.32	57.33	43.01	71.13	60.36	78.98	50.72	99.37	84.72	117.66	111.59	96.76	98.58	95	49.88	43.05	40.64	31.73	69.84	116.36	82.38	95.71	102.74	122.75	62.04	57.09	139.63	102.45	94.9		Arf51F	61.5017	60.255	101.447	55.0233	97.605		Arf51F	0.77	0.170714	0.77	0.204253	0.111796	0.0676963
Arf79F	19.34	22.34	19.09	23.65	23.94	19.37	22.32	14.85	19.99	18.19	24.02	17.11	23.47	18.59	29.83	26.43	23.88	20.43	23.32	13.51	10.87	18.69	24.18	17.98	27	18.13	24.46	24.14	22.23	23.31	27.51	25.32	36.08	25.01		Arf79F	21.2883	19.4133	23.7717	18.0917	25.319		Arf79F	0.71	0.196089	-0.71	-0.275479	0.157679	0.0806224
Arf102F	154.16	208.52	171.02	166.66	216.38	160.3	139.42	135.99	191.51	154.8	181.93	137.73	263.88	246.11	264.43	235.52	244.05	267.43	191.34	172.05	138.89	158.93	111.74	199.09	370.86	321.26	293.9	287.12	258.06	253.33	200.89	362.17	277.31	305.59		Arf102F	179.507	156.897	253.57	162.007	293.049		Arf102F	0.43	0.372712	0.43	0.138721	0.104473	0.184241
ArfGAP1	26.99	36.44	33.23	31.02	32.3	40.09	30.16	23.19	33.15	25.8	35.14	31.16	41.08	27.3	30.74	27.34	23.79	35.3	32.03	29.72	21.23	25.25	26.35	24.1	38.6	29.32	24.15	27.68	25.6	27.41	26.62	36.9	20.67	29.48		ArfGAP1	33.345	29.7667	30.925	26.4467	28.643		ArfGAP1	1.24	0.0578456	-1.24	-0.488103	0.206757	0.0182377
ArfGAP3	18.29	22.88	25.47	22.75	23.56	26.43	21.68	20.06	26.46	23.38	28.38	23.23	31.13	21.41	27.58	29.03	25.44	31.45	22.5	22.07	20.42	18.68	16.57	21.71	31.38	22.42	26.67	19.1	26.86	27.11	19.74	30.14	17.76	25.16		ArfGAP3	23.23	23.865	27.6733	20.325	24.634		ArfGAP3	1.12	0.0766221	-1.12	-0.34364	0.153817	0.0254778
Arfip	22.19	35.99	28.6	11.21	28.51	24.73	16.31	15.75	39.89	25.16	34.05	20.45	101.42	70.5	100.11	90.25	73.03	81.19	30.69	30.6	23.36	16.13	17.83	51.94	107.56	82.19	104.61	98.34	101.63	45.92	46.06	101.37	85.23	76.03		Arfip	25.205	25.2683	86.0833	28.425	84.894		Arfip	8.56	2.77735e-09	8.56	1.26514	0.195429	9.56795e-11
Arfrp1	5.11	7.47	7.73	3.06	13.24	5.66	4.96	4.29	11.52	6.13	9.71	6.19	5.75	5.7	10.74	13.71	12.18	13.92	7.58	6.53	7.2	6.48	5.43	5.99	8.05	10.15	6.87	13.3	7.85	5.73	4.12	12.29	3.28	11.58		Arfrp1	7.045	7.13333	10.3333	6.535	8.322		Arfrp1	0	0.998751	0	0.000928949	0.257555	0.997122
arg	4.11	3.51	4.43	4.15	5.09	5.99	4.42	3.11	4.25	5.09	4.76	3.89	2.69	2.39	3.31	3.37	2.72	4.97	3.88	2.87	3.38	4.26	4.41	4.58	3.29	2.28	3.25	2.73	3	2.72	3.17	3.49	1.59	2.74		arg	4.54667	4.25333	3.24167	3.89667	2.826		arg	5.04	9.02388e-06	-5.04	-0.960279	0.19443	7.85458e-07
Argk	98.89	132.57	117.59	162.16	201.49	94.31	157.46	234.12	61.72	184.96	73.73	219.59	22.71	8.9	8.18	4.51	10.09	25.25	155.57	154.25	195.9	155.42	252.26	172.92	32.15	4.7	5.95	7.04	4.21	137.49	192.81	22.8	17.49	102.12		Argk	134.502	155.263	13.2733	181.053	52.676		Argk	11.74	1.82914e-12	-11.74	-4.01213	0.529873	3.67891e-14
ArgRS	29.19	34.55	36.52	24.21	30.89	29.14	28.74	23.12	29.44	19.23	31.17	20.48	32.72	30.85	35.3	35.45	34.4	34.61	31.43	16.71	18.44	25.12	23.22	28.24	38.13	42.36	43.6	27.43	32.16	27.44	27.41	43.48	42.8	30.88		ArgRS	30.75	25.3633	33.8883	23.86	35.569		ArgRS	0.3	0.506318	-0.3	-0.148835	0.137369	0.2786
ArgRS-m	19.28	19.98	17.38	16.67	12.76	21.1	17.47	11.75	13.21	12.72	16.41	13.76	19.59	17.16	21.68	16.79	14.99	16.91	14.7	10.47	11.66	15.41	12.26	11.93	18.76	16.54	17.05	16.92	15.48	12.41	14.89	18.99	9.75	15.48		ArgRS-m	17.8617	14.22	17.8533	12.7383	15.627		ArgRS-m	0.44	0.366071	-0.44	-0.24915	0.185621	0.179516
ari-1	11.22	18.95	15.01	13.5	19.86	18.17	13	14.57	17.36	15.01	17.66	16.17	22.49	27.27	29.77	28.8	23.87	26.94	18.78	13.31	15.81	13.67	12.22	17.94	17.44	19.31	30.21	22.92	31.39	14.84	12.03	25.69	17.66	18.46		ari-1	16.1183	15.6283	26.5233	15.2883	20.995		ari-1	0.62	0.239845	0.62	0.180902	0.111444	0.104536
ari-2	1.81	3.02	1.71	1.74	5.3	2.31	1.17	2.95	4.73	3.71	1.81	2.06	2.58	5.46	5.71	4.55	4.7	5.68	2.96	2.55	2.71	1.24	1.96	2.53	2.44	4.4	5.2	4.26	4.33	1.73	1.52	2.99	2.34	3.62		ari-2	2.64833	2.73833	4.78	2.325	3.283		ari-2	0.17	0.674163	0.17	0.232697	0.298818	0.436143
Arl1	22.15	32.32	27.69	23.31	56.2	23.22	43.53	30.06	48.98	14.42	23.74	17.48	44.68	59.02	76.88	58.68	49.8	32.05	44.21	28.23	20.73	41.95	38.53	45.85	70.68	59.96	64.11	60.42	45.98	46.44	45.24	74.43	61.74	58.55		Arl1	30.815	29.7017	53.5183	36.5833	58.755		Arl1	0.21	0.615577	0.21	0.274498	0.311392	0.378038
Arl2	18.39	14.65	14.7	15.92	22.22	18.64	11.47	14.99	29.04	17.21	17.85	12.58	30.09	46.53	41.18	42.99	33.1	36.71	15.68	20.63	16.47	17.53	11.24	22.46	35.2	67.02	39.49	46.44	39.79	27.21	23.71	46.66	36.26	31.27		Arl2	17.42	17.19	38.4333	17.335	39.305		Arl2	3.05	0.000886847	3.05	0.614037	0.161438	0.000142636
Arl4	18.85	31.59	19.78	20.47	34.66	23.14	17.52	20.54	32.39	24.03	25.02	26.53	22.31	49.21	49.88	51.89	35.12	36.98	24.17	24.95	23.09	16.38	18.76	25.07	23.9	46.03	44.14	51.03	42.04	24.36	23.42	41.23	29.19	29.25		Arl4	24.7483	24.3383	40.8983	22.07	35.459		Arl4	0.22	0.608526	0.22	0.160637	0.17926	0.370193
Arl5	9.66	16.74	15.2	12.78	23.25	17.07	11.91	16.58	17.14	12.28	13.17	14.04	19.51	27.79	32.25	27.03	22	31.98	15.12	14.92	16.2	11.44	10.92	15.37	19.38	33.17	36.96	35.26	29.14	16.38	15.93	23.1	13.43	25.64		Arl5	15.7833	14.1867	26.76	13.995	24.839		Arl5	0.72	0.191774	0.72	0.319187	0.18141	0.0784968
Arl6	2.45	1.75	2.78	1.49	1.17	1.41	0.61	3	1.41	3.87	2.41	1.26	3.52	2.13	5.05	1.44	4.41	3.26	0.92	2.45	1.97	0.64	1.11	3.36	3.36	4.88	3.83	1.32	3.78	2.22	0.81	3.03	2.95	1.79		Arl6	1.84167	2.09333	3.30167	1.74167	2.797		Arl6	0.01	0.967954	0.01	0.0480224	0.480385	0.920371
Arl6IP1	45.85	84.89	62.94	38.44	122.47	84.7	49.87	45.59	119.64	82.58	83.43	58.43	114.71	171.87	200.23	203.25	158.49	144.39	111.3	71.52	55.33	47.87	39.41	84.48	114.03	129.61	154.52	165.47	158.79	61.42	65.7	152.16	74.54	83.89		Arl6IP1	73.215	73.2567	165.49	68.3183	116.013		Arl6IP1	3.6	0.000248455	3.6	0.641072	0.154534	3.34773e-05
arm	11.56	15.13	12.91	10.05	21.34	18.12	13.55	9.9	15.04	17.89	15.94	11.46	10.95	20.97	28.34	23.88	16.86	20.89	18.22	11.65	12.53	11.59	9.46	11.37	13.78	16.81	16.36	13.12	20.13	8.72	9.77	18.41	8.92	11.37		arm	14.8517	13.9633	20.315	12.47	13.739		arm	0.04	0.922058	-0.04	-0.0439796	0.176859	0.803616
armi	1.77	2.36	1.93	1.46	3.95	3.79	1.58	1.43	7.37	3.27	1.65	2.98	1.96	5.82	4.77	4.52	5.56	3.86	3.73	1.75	1.8	2.32	1.47	2.3	3.08	3.76	3.51	3.79	4.37	1.45	1.58	5.11	0.97	1.76		armi	2.54333	3.04667	4.415	2.22833	2.938		armi	0.01	0.98176	0.01	0.0203891	0.357037	0.95446
Arp1	34.97	43.11	37.46	36.33	47.53	40.39	37.77	31.8	34.65	29.53	39.12	33.13	42.63	48.88	65.36	58.25	58.21	68.92	37.56	34.8	28.29	40.08	28.78	41.66	57.45	58.9	62.92	56.73	63.7	38.17	33.3	58.06	39.1	51.42		Arp1	39.965	34.3333	57.0417	35.195	51.975		Arp1	0.23	0.584173	0.23	0.136946	0.14518	0.345534
Arp2	14.15	23.87	18.17	13.57	21.67	20.49	12.6	13.09	23.31	16.01	23.56	13.51	50.87	42.2	56.94	48.07	52.64	45.66	22.62	16.33	13.4	16.03	16.04	35.71	46.79	43.81	60.55	60.64	56.47	26.27	25.64	56.27	46.33	40.71		Arp2	18.6533	17.0133	49.3967	20.0217	46.348		Arp2	11.38	4.16304e-12	11.38	1.0082	0.135187	8.79734e-14
Arp3	80.24	106.45	85.96	79.81	86.24	100.51	89.64	68.65	92.16	92.18	113.71	62.65	257.06	251.62	369.99	300.95	274.09	326.99	99.76	92.73	52.96	70.77	66.28	184.93	286.89	329.64	328.34	316.75	330.1	153.24	141.42	376.21	263.89	248.95		Arp3	89.8683	86.4983	296.783	94.5717	277.543		Arp3	18.5	3.13059e-19	18.5	1.21536	0.128476	3.08443e-21
Arp5	10.64	11.01	11.78	10.41	14.45	12.35	10.73	9.23	17.26	10.74	12.06	11.28	10.43	16.86	16.19	17.5	13.63	15.84	9.96	10.76	8.12	8.43	5.97	10.88	13.74	17.56	12.4	11.84	11	10.33	7.32	15.37	10.7	13.74		Arp5	11.7733	11.8833	15.075	9.02	12.4		Arp5	0.87	0.13429	-0.87	-0.217382	0.111054	0.0502959
Arp6	22.48	22.63	25.42	21.68	20.82	27.95	21.91	14.16	26.4	31.91	29.72	20.54	31.79	30.41	33.99	29.83	23.53	37.18	30.1	19.34	17.88	17.39	18.36	22.86	29.69	36.61	24.21	25.26	29.48	19.47	22.16	29.64	16.24	22.11		Arp6	23.4967	24.1067	31.1217	20.9883	25.487		Arp6	0.24	0.570827	-0.24	-0.173478	0.179358	0.333438
Arp8	6.12	5.41	4.63	4.27	6.24	4.16	5.6	5.55	9.73	3.64	6.38	3.48	6.21	46.1	19.38	12.04	16.14	16.11	3.3	7.45	4.33	5.86	3.08	4.07	4.27	20.68	9.02	7.87	10.47	4.84	2.1	5.18	4.15	5.1		Arp8	5.13833	5.73	19.33	4.68167	7.368		Arp8	1.9	0.0126684	1.9	1.15611	0.390213	0.00304896
Arp10	21.95	21.71	21.62	17.35	21.41	21.13	17.6	11.51	20.13	17.95	18.75	16.06	19.78	25.97	33.04	24.15	30.21	28.32	23.68	15.76	18.85	15.48	13.83	20.66	31.4	33.09	37.53	21.75	29.63	19.49	21.01	29.66	10.92	18.94		Arp10	20.8617	17	26.9117	18.0433	25.342		Arp10	0.18	0.654284	0.18	0.096667	0.118787	0.415768
Arp53D	2.94	1.84	0.66	1.73	12.11	0.87	0.68	0.43	35.48	2.15	0.48	0.18	1.17	14.5	1.61	6.52	18.58	12.16	3.84	5.39	0	2.66	0	0.25	2.58	0.36	1.68	16.56	1.12	4.62	3.6	6.77	0	3.67		Arp53D	3.35833	6.56667	9.09	2.02333	4.096		Arp53D	0.03	0.942858	0.03	0.174154	0.927177	0.851008
Arpc1	41.31	68.52	54.94	41.09	45.98	62.21	35.11	32.62	55.75	48.99	71.99	35.8	134.18	130.05	182.95	156.46	167.91	195.73	56.95	73.92	49.15	36.91	28.61	115	131.93	187.18	158.71	139.76	185.31	68.75	64.88	186.87	102.9	120.31		Arpc1	52.3417	46.71	161.213	60.09	134.66		Arpc1	14.37	4.24448e-15	14.37	1.24686	0.149142	6.25842e-17
Arpc2	32.06	42.08	38.09	29.89	47.71	41.06	35.65	23.46	36.35	31.96	53.37	28.5	80.77	91.43	118.84	102.49	93.83	112.33	41.65	36.45	23.31	32.4	21.96	65.22	89.39	94.9	100.01	96.49	103.17	57.43	51.66	117.82	77.67	72.78		Arpc2	38.4817	34.8817	99.9483	36.8317	86.132		Arpc2	9.82	1.51054e-10	9.82	0.961846	0.138682	4.04399e-12
Arpc3A	38.02	44.08	44.05	35.99	49.37	47.59	43.15	39.59	55.01	44.66	57.93	36.15	68.41	74.16	92.49	91.19	80.7	84.39	44.97	43.49	37.89	37.08	31.98	64.88	78.93	100.48	73.61	69.82	72.25	55.39	49.5	78.25	60.13	53.93		Arpc3A	43.1833	46.0817	81.89	43.3817	69.229		Arpc3A	2.31	0.00484279	2.31	0.265581	0.0807174	0.00100096
Arpc3B	44.27	66.47	41.67	25.17	47.87	56.14	31.79	37.7	62.31	46.41	62.27	34.87	144.03	165.65	218.3	184.36	154.99	189.6	70.9	50.59	37.62	29.56	37.67	96.21	157.49	246.95	187.56	138.75	145.21	72.49	86.01	197.55	119.29	126.86		Arpc3B	46.9317	45.8917	176.155	53.7583	147.816		Arpc3B	26.11	7.82115e-27	26.11	1.39426	0.124656	4.83607e-29
Arpc4	192.62	235.87	164.79	142.78	208.2	221.41	148.28	178.48	196.5	189.99	232.88	160.22	383.38	381.79	499.8	418.86	360.7	470.03	207.19	222.33	163.36	138.52	174.98	298.12	417.04	513.16	482.54	436.33	433.33	252.94	226.45	467.08	370.1	309.45		Arpc4	194.278	184.392	419.093	200.75	390.842		Arpc4	4.43	3.72786e-05	4.43	0.612441	0.132591	3.85527e-06
Arpc5	181.82	163.94	169.59	129.59	156.82	202.66	137.5	98.87	164.81	149.69	218.49	117.03	262.69	364.04	449.54	366.42	408.89	448.24	179.08	181.27	121.83	124.19	109.97	210.24	304.67	423.94	394.38	281.77	321.09	180.33	165.46	428.69	241.71	275.74		Arpc5	167.403	147.732	383.303	154.43	301.778		Arpc5	8.18	6.57691e-09	8.18	0.818124	0.129322	2.51153e-10
arr	1.4	0.62	1.26	1.41	1.83	1.19	1.12	0.75	1.59	1.25	0.99	0.86	1.14	1.73	1.24	1.41	1.59	1.12	1.18	0.82	1.3	1.14	0.85	1.54	1.2	0.78	1.46	2.12	2.07	1.17	1.11	1.09	2.05	0.76		arr	1.285	1.09333	1.37167	1.13833	1.381		arr	0.5	0.313948	-0.5	-0.220864	0.152178	0.146681
Arr1	0.03	0	0	0.58	1.16	1.07	0.46	0.85	0.22	1.19	0.04	0	0	0.36	0	0.11	0	1.78	0	0.11	0.81	1.25	0.68	1.83	0.19	0	0	0.7	0.15	0	0	0	0	0		Arr1	0.473333	0.46	0.375	0.78	0.104		Arr1	0.13	0.740137	-0.13	-0.75224	1.14641	0.511714
Arr2	0	0	0	0	0	0.18	0.13	0	0	0.16	0.27	0	0	0	0	0	0	0.15	0	0	0.13	0.04	0.22	0.11	0	0.15	0	0	0	0	0	0	0	0		Arr2	0.03	0.0933333	0.025	0.0833333	0.015		Arr2	0	NA	0	-1.10035	1.32951	0.407875
Ars2	29.9	40.86	42.33	37.83	41.74	54.68	28	23.24	37.31	39.37	37.98	33.68	43.9	45.01	61.51	58.52	48.2	52.35	46.27	28.17	34.85	31.3	22.71	42.16	54.52	43.83	51.17	39.8	60.14	35.26	28.08	55.07	31.94	41.14		Ars2	41.2233	33.2633	51.5817	34.2433	44.095		Ars2	0.1	0.797433	0.1	0.0659664	0.121441	0.586993
Art1	30.62	22.96	36.15	21.82	22.54	35.9	34.98	22.65	25.52	23.2	37.06	18.35	39.83	41.65	40.94	47.1	32.68	33.13	36.28	17.49	17.64	19.52	16.26	19.84	42.98	58.16	40.26	41.22	34.58	25.22	14.76	39.16	49.36	21.42		Art1	28.3317	26.96	39.2217	21.1717	36.712		Art1	0.02	0.960491	-0.02	-0.0251302	0.196036	0.897997
Art2	0.28	0.03	0.48	0.2	1.94	0.17	0	0.07	1.28	0.11	0.16	0	0	0.69	0.13	0.47	1.27	0.79	0.14	1.06	0.04	0.54	0	0.15	0.16	0	0	0.83	0.19	0.5	0.2	0.82	0.45	0.24		Art2	0.516667	0.27	0.558333	0.321667	0.339		Art2	0.12	0.761755	0.12	0.611081	0.993274	0.53841
Art3	7.51	9.03	9.19	7.59	8.46	11.21	9.47	4.15	9.81	7.11	10.73	4.12	8.86	5.62	6.89	8.51	7.45	6.93	7.41	2.42	4.01	7.47	5.67	5.26	11.43	7.76	7.84	6.42	9.16	6.41	4.52	6.79	10.06	5.83		Art3	8.83167	7.565	7.37667	5.37333	7.622		Art3	1.18	0.0653889	-1.18	-0.552483	0.239673	0.021158
Art4	1.93	2.04	1.68	1.46	1.72	1.48	1.7	1.3	1.78	1.71	1.59	0.88	1.47	1.42	1.84	1.02	1.44	1.17	1.08	1.14	1.76	1.52	1.28	0.99	1.87	1.24	1.98	1.95	1.59	0.76	1.77	1.83	1.45	1.62		Art4	1.71833	1.49333	1.39333	1.295	1.606		Art4	1.8	0.0159635	-1.8	-0.652869	0.226959	0.00401989
Art6	1.95	0.1	1.91	1.01	2.28	1.07	0.84	0	8.78	0.23	0.89	0	0.82	2.29	0.53	0.29	6.45	1.6	1.19	2.55	0.25	0.24	0	0	4.34	0	0	4.92	0	1.43	1.48	1.71	1.12	1.96		Art6	1.38667	1.79	1.99667	0.705	1.696		Art6	0.01	0.968061	-0.01	-0.0978175	0.994492	0.921647
Art7	2.86	2.09	3.22	2.79	5.75	2.8	3.22	2.71	10	2.64	4.12	1.36	2.13	6.64	2.61	3.57	7.03	8.37	1.75	4.05	1.85	3.45	0.89	2.02	2.74	3.07	2.63	6.36	1.51	1.95	1.89	4.71	1.86	3.17		Art7	3.25167	4.00833	5.05833	2.335	2.989		Art7	0.05	0.887482	-0.05	-0.142313	0.41844	0.733779
Art8	11.35	11.56	16.27	8.23	14.85	14.99	10.07	5.38	13.8	12.83	12.62	8.56	15.26	14.48	16.84	17.81	15.55	16.61	16.43	8.79	9.54	9.7	8.99	10.75	10.69	20.77	18.78	17.66	17.59	10.68	10.35	16.86	9.98	11.35		Art8	12.875	10.5433	16.0917	10.7	14.471		Art8	0.07	0.850259	0.07	0.0645229	0.150292	0.667693
Art9	0.08	0.19	0	0	1.68	0	0	0	1.48	0	0	0	0	1.15	0	0	2	0.83	0	0.37	0	0.58	0	0	0.6	0	0	0.29	0	0.98	0.12	0.65	0	0		Art9	0.325	0.246667	0.663333	0.158333	0.264		Art9	0.08	0.825098	0.08	0.654653	1.35339	0.628589
aru	10.33	9.07	9.68	8.26	9.07	9.06	9.54	7.24	8.36	8.36	7.69	8.67	29.52	23.77	30.73	29.66	24.96	30.58	10.14	6.61	7.96	8.79	7.39	25.09	32.16	34.72	48.65	40.31	40.68	17.9	17.68	44.03	23.95	26.47		aru	9.245	8.31	28.2033	10.9967	32.655		aru	9.46	3.45884e-10	9.46	1.17362	0.172439	1.00355e-11
Arv1	7.63	7.38	6.79	7.83	7.5	6.32	6.39	7.64	10.39	5.45	8.31	6.2	6.41	10.21	13.88	11.24	8.82	13.17	10.08	7.22	6.87	6.77	4.66	6.82	9.14	9.93	12.96	15.96	13.47	4.31	5.84	13.72	3.77	8.79		Arv1	7.24167	7.39667	10.6217	7.07	9.789		Arv1	0.04	0.913459	-0.04	-0.0515396	0.190658	0.78691
arx	18.82	40.27	26.47	8.65	52.31	25.18	13.74	17.25	55.36	40.66	27.08	22.57	23.61	53.96	79.73	77.53	44.02	49.27	45.55	27.19	22	14.7	13.39	19.21	37.74	50.29	43.52	39.71	36.1	25.51	15.81	47.97	21.94	30.11		arx	28.6167	29.4433	54.6867	23.6733	34.87		arx	0.33	0.469538	0.33	0.352958	0.307367	0.250833
ARY	0	0.14	0	0.09	3.63	0.29	0	0	5.31	0.66	0	0	0	0.77	0.19	0.31	2.57	1.36	0.77	0.98	0	0.7	0	0	0.09	0	0	2.2	0.14	0.84	0	1.1	0	1.62		ARY	0.691667	0.995	0.866667	0.408333	0.599		ARY	0.04	0.911466	-0.04	-0.337285	1.22211	0.782558
Asap	3.58	4.68	6.34	3.14	3.61	4.28	3.53	2.74	5.01	4.17	6.03	2.61	6.98	6.61	9.52	8.99	7.7	8.12	5.46	4.75	3.14	3.9	2.25	5.32	6.8	7.57	7.85	8.93	8.4	5.05	3.57	10.54	5.32	6.55		Asap	4.27167	4.015	7.98667	4.13667	7.058		Asap	2.15	0.00709655	2.15	0.455101	0.143824	0.00155462
Asator	1.82	2.18	2.38	2.03	3.2	1.85	2.02	2.13	3.13	2.13	2.47	2.45	2.01	4.27	3.76	4.75	3.57	2.71	2.75	1.55	2.19	1.78	1.75	3.38	2.51	3.47	5.05	5.16	5.16	1.88	2.38	4.12	3.47	3.12		Asator	2.24333	2.38833	3.51167	2.23333	3.632		Asator	0.03	0.938058	-0.03	-0.0349579	0.169908	0.836989
Asciz	0.6	2.53	1.15	1.24	2.92	1.04	2	3.76	3.65	1.87	0.91	1.35	1.65	2.31	3.92	4.23	2.77	1.44	1.67	1.75	1.29	1.52	1.94	2.8	2.55	3.35	3.32	5.56	2.84	2.16	2.18	1.88	2.76	1.67		Asciz	1.58	2.25667	2.72	1.82833	2.827		Asciz	0.2	0.628899	-0.2	-0.350956	0.409583	0.39152
ase	0	0	0.06	0.21	0.3	0.35	0.18	0	0	0.22	0	0	0.64	0	0	0	0	0.07	0	0	0.42	0.26	0.13	0.29	0	0.07	0	0	0	0	0	0	0	0		ase	0.153333	0.0666667	0.118333	0.183333	0.007		ase	0.03	0.934801	0.03	0.291918	1.35806	0.829805
asf1	23.46	30.63	32.09	22.46	31.8	26.25	23.99	22.17	35.99	25.67	29.37	19.6	44.38	39.19	44.13	40.44	42.5	56.57	33.87	20.59	27.58	22.13	17.97	25.45	47.45	64.51	41	35.63	44.38	26.66	17.7	52.26	27.77	40.04		asf1	27.7817	26.1317	44.535	24.5983	39.74		asf1	0.66	0.216618	0.66	0.223132	0.132357	0.091828
ash1	2.56	3.61	2.65	2.66	5.52	3.61	1.79	2.1	7.25	3.68	3.08	2.78	4.78	5.12	5.59	6.39	5.26	3.77	4.95	2.39	2.86	2.71	1.93	3.86	3.8	3.92	7.43	7.27	8.05	2.43	3.26	5.84	3.61	4.52		ash1	3.435	3.44667	5.15167	3.11667	5.013		ash1	0.05	0.892919	0.05	0.0810741	0.247805	0.74354
ash2	6.04	9.13	8.86	4.37	9.98	6.65	3.89	7.69	10.97	9.21	8.28	5.46	12.73	18.67	17.83	17.93	14.08	15.04	11.22	4.64	4.96	5.99	4.76	9.36	13.98	15.64	15.91	17.86	21.46	8.55	7.44	15.86	14.5	13.9		ash2	7.505	7.58333	16.0467	6.82167	14.51		ash2	1.61	0.0244853	1.61	0.526444	0.193881	0.00662168
Ask1	5.82	5.89	4.93	5.35	7.86	5.13	6.1	5.89	7.11	6.06	5.04	5.31	7.75	12.14	11.64	11.76	9.88	10.04	5.76	6.53	4.95	5.37	5.76	8	8.22	13.94	11.71	11.83	12.18	7.26	7.06	12.56	5.13	7.71		Ask1	5.83	5.91833	10.535	6.06167	9.76		Ask1	0.7	0.198104	0.7	0.238989	0.137367	0.0818961
asl	5.8	6.78	6.37	3.77	10.12	7.14	4.74	4.3	12.75	6.79	7.24	4.77	9.16	10.19	12.01	12.33	11.19	9.68	7.14	4.56	4.85	5.21	4.33	8.47	11.22	7.22	10.98	9.94	9.78	5.41	5.5	12.31	1.76	6.09		asl	6.66333	6.765	10.76	5.76	8.021		asl	0.22	0.598565	0.22	0.157246	0.171765	0.359944
AsnRS	32.82	32.39	37.33	38.15	28	37.15	34.09	31.53	35.07	33.5	33.4	29.72	40.21	32.83	41.59	45.08	37.12	40.02	35.78	32.92	29.61	33.9	32.6	25.63	45.08	46.38	40.85	39.84	35.73	29.01	24.88	33.31	24.89	26.35		AsnRS	34.3067	32.885	39.475	31.74	34.632		AsnRS	1.1	0.0787339	-1.1	-0.315995	0.142304	0.0263802
AsnRS-m	2.91	4.49	4.42	2.86	4.21	4.2	2.42	2.29	5.53	3.33	3.28	3.58	2.45	6.41	4.82	7.86	4.7	4.58	3.31	3.75	2.25	2.2	1.45	1.84	4.83	3.37	5.15	3.16	5.72	1.12	2.36	7.01	0.71	5.02		AsnRS-m	3.84833	3.405	5.13667	2.46667	3.845		AsnRS-m	0.03	0.937484	0.03	0.0498827	0.240043	0.835379
AsnS	9.98	13.1	9.18	6.91	10.84	9.06	8.62	15.43	16.78	11.16	13.98	6.65	10.48	12.19	13.06	11.69	17.27	12.33	15.08	8.19	8.34	7.15	6.43	8.44	12.79	14.9	11.34	10.61	12.68	16.52	5.9	10.06	10.65	7.27		AsnS	9.845	12.1033	12.8367	8.93833	11.272		AsnS	1.03	0.0925012	-1.03	-0.476925	0.222434	0.0320238
asp	1.02	2.06	2.78	1.22	4.82	3.19	1.61	1.28	3.77	2.82	3.39	1.51	1.95	3.34	3.3	4.64	2.51	2.84	3.3	1.57	2.06	2.33	1.08	3.32	1.53	3.52	2.33	2.93	3.46	1.5	0.84	3.34	0.39	2.01		asp	2.515	2.39667	3.09667	2.27667	2.185		asp	0.13	0.747515	-0.13	-0.146715	0.228108	0.520107
Asph	61.31	55.22	75.4	91.61	48.72	64.44	64.89	52.11	19.44	68.61	32.63	84.41	19.22	6.6	4.3	3.51	6.66	23.21	58.36	28.16	53.98	61.91	56.06	58.7	17.61	1.55	4.68	7.83	3.1	31.38	66.7	10.97	12.49	26.46		Asph	66.1167	53.6817	10.5833	52.8617	18.277		Asph	5.2	6.29664e-06	-5.2	-2.80903	0.559768	5.21547e-07
ASPP	0.45	0.21	0.47	0.59	1.03	0.63	0.36	0.32	0.3	0.63	0.18	0.48	0.23	0.36	0.21	0.2	0.25	0.29	0.36	0.29	0.6	0.53	0.53	0.77	0.28	0.11	0.28	0.73	0.43	0.41	0.39	0.16	0.45	0.27		ASPP	0.563333	0.378333	0.256667	0.513333	0.351		ASPP	2.37	0.00430459	-2.37	-1.1567	0.347498	0.000872694
AspRS	19.98	25.87	23.4	18.43	21.94	21.96	17.65	19.18	27.71	18.1	20.55	21.54	28.14	38.28	45.25	41.69	37.28	34.87	25.89	21.22	16.81	16.65	19.92	24.16	34.84	44.06	41.24	44.19	38.03	21.04	22.99	36.04	27.78	31.4		AspRS	21.93	20.7883	37.585	20.775	34.161		AspRS	1.19	0.0652347	1.19	0.272171	0.118	0.0210815
AspRS-m	6.51	6.4	7.3	5.87	7.87	6.77	6.79	5.23	13.07	6.54	7.71	5.09	7.09	10.39	10.09	9.9	8.74	8.69	5.13	5.77	5.42	6.3	4.49	7.14	7.43	7.91	8.22	10.94	9.54	5.36	7.14	9.85	4.07	6.62		AspRS-m	6.78667	7.405	9.15	5.70833	7.708		AspRS-m	0.61	0.2431	-0.61	-0.226241	0.140094	0.106327
asrij	52.18	54.91	47.97	56.12	51.1	61.27	49.47	37.18	43.27	33.85	55.62	38.35	43.53	44.13	44.03	38.98	48.25	57.71	42.32	48.96	41.03	47.63	42.03	29.94	44.07	41.32	34.56	38.69	36.73	39.82	37.65	58.07	35.66	35.82		asrij	53.925	42.9567	46.105	41.985	40.239		asrij	1.65	0.0221543	-1.65	-0.467209	0.169676	0.00589563
ast	2.59	3.8	2.87	2.4	5.86	3.91	3.22	2.06	8.91	3.28	3.85	1.83	3.59	6.94	7.9	6.83	5.33	3.96	4.68	2.46	1.47	3.26	3.56	4.95	4.76	4.51	7.2	9.23	5.14	4.58	2.71	6.57	5.45	2.45		ast	3.57167	3.85833	5.75833	3.39667	5.26		ast	0.04	0.907089	0.04	0.085151	0.2964	0.773895
AstA	3.86	4.13	1.37	5.52	2.17	2.7	3.36	3.96	1.46	1.49	4.12	0.29	2.13	1.87	1.2	0.95	1.66	1.52	0.28	4.17	1.97	3.98	3.91	2.58	2.18	0.81	2.25	2.65	2.91	3.16	1.99	1.63	3.42	3.84		AstA	3.29167	2.44667	1.555	2.815	2.484		AstA	1.13	0.0735065	-1.13	-1.17178	0.520079	0.0242541
AstA-R1	0.54	0.36	0.4	0.4	0.42	0.53	0.16	0.2	0.39	0.34	0.55	0.28	0.65	1.75	1.71	1.29	1.26	0.71	0.41	0.31	0.36	0.21	0.17	0.7	0.78	0.95	1.83	2.3	2.78	0.48	0.35	0.72	1.3	0.34		AstA-R1	0.441667	0.32	1.22833	0.36	1.183		AstA-R1	4.82	1.52196e-05	4.82	1.38941	0.287988	1.40334e-06
AstA-R2	1.22	0.98	0.41	1.33	0.38	0.52	0.59	1.01	0.32	0.45	0.75	0.88	0.09	0.3	0.08	0	0.11	0.2	0.63	1.46	0.3	1.21	0.96	0.47	0.23	0.04	0.02	0.3	0.09	0.9	0.69	0	0	0.91		AstA-R2	0.806667	0.666667	0.13	0.838333	0.318		AstA-R2	5.08	8.27672e-06	-5.08	-2.85518	0.575847	7.11425e-07
AstC	2.51	3.74	0.3	4.01	1.12	0.59	0.64	3.56	1.27	0.77	3.57	0.07	0.68	0.66	0.67	0.13	0.11	0.32	0	4.53	3.23	4.69	1.5	1.78	0.2	0.43	1.14	1.63	0.35	3.96	1.09	0.15	0.43	0.5		AstC	2.045	1.64667	0.428333	2.62167	0.988		AstC	2.2	0.00630991	-2.2	-2.3068	0.719973	0.00135528
AstC-R1	0.09	0.03	0.06	0.13	0	0.09	0.01	0	0.03	0.01	0.05	0.01	0.13	0.16	0.12	0.13	0.3	0.09	0.03	0.06	0.01	0.04	0.03	0.09	0.03	0.01	0.31	0.65	0.24	0.09	0.04	0.05	0.54	0		AstC-R1	0.0666667	0.0183333	0.155	0.0433333	0.196		AstC-R1	3.95	0.000112062	3.95	2.46786	0.567021	1.34699e-05
AstC-R2	0.31	0.32	0.21	0.4	0.2	0.35	0.22	0.26	0.12	0.22	0.26	0	0.08	0.21	0.04	0.18	0.08	0.09	0.2	0.42	0.6	0.41	0.24	0.4	0.09	0.02	0.13	0.62	0.18	0.5	0.23	0.07	0.28	0.03		AstC-R2	0.298333	0.18	0.113333	0.378333	0.215		AstC-R2	0.75	0.177714	-0.75	-1.18891	0.659357	0.0713658
AstCC	0.12	0	0	0.25	0.5	0.44	0.06	0	0.06	0.08	0.06	0	0	0.18	0.43	0	0.32	0	0	0	0.16	0	0	0.2	0	0	0	1.71	0.65	0	0	0.56	0.37	0		AstCC	0.218333	0.0433333	0.155	0.06	0.329		AstCC	0.24	0.573364	0.24	1.04353	1.08391	0.335673
ASTR	0.17	0.68	0.36	0.48	1.06	1.27	0.82	0.28	1.78	0.04	0.45	0.17	1.18	0.36	0.6	1.28	0.66	0.44	0.62	0.41	0.29	0.32	0.64	0.24	1.21	0.79	1.9	1.29	1.28	0.44	0.38	0.65	0.21	0.86		ASTR	0.67	0.59	0.753333	0.42	0.901		ASTR	0.02	0.947193	-0.02	-0.10971	0.624865	0.860628
asun	0.98	1.92	1.63	1.67	2.8	1.54	1.2	0.8	2.24	2.14	1.31	0.7	2.82	2.08	3.28	3.82	2.74	4.64	2.24	1.73	1.82	0.81	1.54	2.12	2.31	4.06	6.56	1.5	3.85	1.61	1.09	3.17	0.62	1.07		asun	1.75667	1.39833	3.23	1.71	2.584		asun	1.22	0.0601263	1.22	0.674552	0.287859	0.019112
Asx	2.22	4	3.66	2.63	5.71	3.99	2.99	2.18	4.12	3.12	4	2.66	4.7	4.06	6.95	4.65	5.62	4.77	3.19	1.99	2.19	2.13	2.78	3.29	5.21	4.31	5.46	5.34	6.28	3.49	2.9	5.6	5.31	3.65		Asx	3.70167	3.17833	5.125	2.595	4.755		Asx	0.26	0.55486	0.26	0.141646	0.142001	0.318521
Atac1	4.3	4.93	5.13	4.09	6.09	3.09	2.81	1.84	5.15	2.83	4.61	3.77	2.42	7.55	6.73	5.24	4.67	5.91	4.47	2.68	4.64	2.3	3.38	6.4	6.97	7.82	8.23	9.99	6.44	4.34	2.04	4.02	4.08	3.13		Atac1	4.605	3.50167	5.42	3.97833	5.706		Atac1	0.05	0.891305	0.05	0.0816542	0.246312	0.740261
Atac2	3.78	3.42	2.42	3.49	3.95	4.98	2.38	2.48	3.4	2.9	4.24	3.17	6.16	6.65	6.91	7.48	5.11	5.56	5.75	2.59	3.62	2.85	3.2	4.75	4.87	5.53	7.81	4.86	5.92	2.47	2.36	7.17	3.03	3.34		Atac2	3.67333	3.095	6.31167	3.79333	4.736		Atac2	1.69	0.0202216	1.69	0.461938	0.165664	0.00529689
Atac3	2.22	2.7	2.31	1.26	2.64	1.13	1.47	2	2.93	1.42	1.48	1.3	1.03	3.32	3.42	4.17	3.54	2.19	3.16	3.13	2.55	0.8	2.08	2.02	1.62	3.43	3.2	5.57	2.98	3.45	1.38	3.55	1.18	2.1		Atac3	2.04333	1.76667	2.945	2.29	2.846		Atac3	0.1	0.801211	0.1	0.152872	0.285697	0.592592
ATbp	0.53	1.42	0.81	0.13	0.76	0.86	0.28	0.53	1.6	0.29	0.54	1.57	1.02	1	1.05	2.4	1.85	2.32	0.54	0.54	1.24	0.3	0.58	0.92	1.9	0.37	1.52	1.3	3.45	1.29	0.68	1.19	1.11	0.23		ATbp	0.751667	0.801667	1.60667	0.686667	1.304		ATbp	0.21	0.62372	0.21	0.427688	0.493626	0.38626
Ate1	15.15	21.04	14.58	10.63	19.38	17.96	19.97	13.4	29.14	15.49	23.52	13.08	15.25	16.73	24.35	19.65	23.94	16.58	30.55	16.24	10.74	14.61	8.73	12.25	15.06	16.3	17.82	16.6	17.8	11.28	14.35	30.72	16.17	16.32		Ate1	16.4567	19.1	19.4167	15.52	17.242		Ate1	2.35	0.00446474	-2.35	-0.513042	0.154669	0.000909816
Atet	5.37	4	5.13	3.67	3.39	4.73	4.2	2.54	3.85	4.19	5.96	3.12	8.12	9.43	9.7	9.72	6.57	5.62	4.41	5.2	3.24	3.64	3.02	5.34	6.26	6.55	8.29	7.58	8.57	3.84	3.81	6.75	6.31	6.08		Atet	4.38167	3.97667	8.19333	4.14167	6.404		Atet	1.34	0.0454403	1.34	0.490712	0.198944	0.013641
Atf-2	5.12	6.98	5.23	4.73	12.46	7.96	4.47	1.97	13.47	6.77	7.8	4.24	7.15	12.02	9.52	11.43	11.74	13.25	7	7.37	5.42	4.48	3.36	11.04	12.39	11.89	7.74	13.21	9.58	8.52	5.06	9.8	5.55	11.31		Atf-2	7.08	6.45333	10.8517	6.445	9.505		Atf-2	0.22	0.598149	0.22	0.262109	0.285944	0.359328
Atf3	5.49	5.12	5.17	5.67	6.16	6.03	4.56	5.09	5.22	5.56	5.2	6.01	5.15	5.52	6.72	5.45	6.16	5.15	6.81	4.91	4.28	5.79	5.72	6.29	4.93	4.12	7.02	6.48	7.24	4.76	5.51	5.13	3.91	5.31		Atf3	5.60667	5.27333	5.69167	5.63333	5.441		Atf3	2.05	0.00897151	-2.05	-0.485887	0.157522	0.00203851
Atf6	8.48	10.87	11.29	8.88	13.83	10.73	7.43	7.98	12.16	9.38	12.08	9.92	17.97	17.31	22.28	19.62	20.98	14.93	11.59	7.95	7.69	7.46	7.94	13.91	16.89	17.59	21.14	19.57	20.79	9.07	10.4	19.72	14.96	14.24		Atf6	10.68	9.825	18.8483	9.42333	16.437		Atf6	1.83	0.0147334	1.83	0.38202	0.131406	0.00364707
Atg1	3.36	3.37	2.8	2.67	3.62	3.42	2.68	3.45	4.12	2.96	3.65	2.49	5.82	9.6	8.27	9.44	6.85	6.84	3.64	2.81	2.52	3.48	2.61	5.65	4.52	7.94	10.15	10.63	8.72	3.25	4.32	6.51	5.29	6.1		Atg1	3.20667	3.225	7.80333	3.45167	6.743		Atg1	5.01	9.72776e-06	5.01	0.695104	0.141228	8.57301e-07
Atg2	1.23	1.91	1.02	0.92	2.78	1.3	0.85	1.04	2.07	1.64	1.32	1.03	2.22	4.38	2.76	2.49	2.18	2.58	1.73	1.11	0.68	1.87	1.74	1.69	1.84	2.38	3.95	3.4	2.79	1.47	1.08	1.28	1.07	1.44		Atg2	1.52667	1.325	2.76833	1.47	2.07		Atg2	1.21	0.0616579	1.21	0.517746	0.222084	0.0197371
Atg3	27.18	26.35	25.47	25.86	32.52	25.61	19.85	28.87	36.31	25.07	33.59	23.32	17.79	46.11	49.51	38.21	34.47	43.9	27.74	28.86	21.81	18.69	19.28	24.21	35.05	48.29	46.67	28.55	31.55	35.04	25.5	34.97	15.51	30.51		Atg3	27.165	27.835	38.3317	23.4317	33.164		Atg3	0.12	0.754513	-0.12	-0.124654	0.198167	0.529327
Atg4a	3.47	4.44	3.65	3.06	4.34	3.33	2.93	3.06	6.2	3.56	3.32	3.52	4.99	8.76	6.88	7.05	6.4	7.88	3.91	4.19	4.72	3.39	3.75	5.03	7.18	6.36	7.17	7.13	9.94	2.87	3.32	5.46	3.12	4.86		Atg4a	3.715	3.765	6.99333	4.165	5.741		Atg4a	1.03	0.0925287	1.03	0.339311	0.158267	0.0320396
Atg4b	2.8	3.48	1.85	2.95	5.04	3.94	3.22	3.81	3.28	5.57	3.73	2.26	4.84	4.28	4.52	4.95	4.01	4.82	3.66	3.38	5.37	3.04	3.61	3.57	3.97	3.99	4.89	3.64	5.59	2.48	2.48	4.93	1.62	4.24		Atg4b	3.34333	3.645	4.57	3.77167	3.783		Atg4b	0.3	0.501736	-0.3	-0.250031	0.229301	0.275534
Atg5	1.5	1.49	1.55	1.23	1.97	1.78	1.15	1.29	1.99	1.73	1.79	1.61	1.94	3.46	3.49	3.84	3.82	2.95	1.73	1.26	1.96	1.17	1.01	2.22	2.04	2.98	4.23	4.24	4.63	1.6	1.64	3.12	3.21	2.25		Atg5	1.58667	1.59333	3.25	1.55833	2.994		Atg5	2.24	0.00576153	2.24	0.459608	0.142145	0.0012234
Atg6	3.97	5.28	4.92	3.32	6.05	4.98	4.18	6.39	12.98	4	5.14	3.09	18.01	14.02	11.58	7.3	9.82	8.9	8.3	5.2	4.78	5.46	6.19	9.05	11.07	15.6	18.39	8.61	7.95	7.31	5.14	9.18	7.88	12.02		Atg6	4.75333	5.96333	11.605	6.49667	10.315		Atg6	0.43	0.37032	0.43	0.473399	0.354994	0.182354
Atg7	5.21	7.39	3.15	5.33	6.35	4.53	4.18	3.21	5.46	3.52	6.09	4.42	4.3	12.59	10	11.83	7.74	7.93	4.05	7.53	4.37	4.21	3.14	4.93	6.73	8.52	9.49	5.84	10.15	5.51	3.75	7.81	3.89	5.81		Atg7	5.32667	4.48	9.065	4.705	6.75		Atg7	0.99	0.101165	0.99	0.436925	0.20807	0.0357381
Atg8a	38.13	57.54	45.05	40.79	93.33	55.61	46.81	62.37	81.87	66.13	52.75	53.59	56.52	132.41	127.07	129.86	106.39	101.51	61.48	64.11	61.39	54.2	56.48	77.58	59.47	132.6	123.07	121.37	116.2	46.32	54.74	90.05	46.99	63.52		Atg8a	55.075	60.5867	108.96	62.54	85.433		Atg8a	0.44	0.361891	0.44	0.246089	0.182261	0.176951
Atg8b	2.82	1.4	0.48	1.11	27.84	1.9	0	1.88	44.61	2.25	0.18	0.4	0.36	26.24	1.88	11.41	30.55	23.24	1.53	9.72	0.44	2.59	0	0	1.58	0	2.7	37.32	3.51	5.28	2.19	10.58	0	4.55		Atg8b	5.925	8.22	15.6133	2.38	6.771		Atg8b	0.09	0.815884	0.09	0.5252	1.04303	0.614588
Atg9	5.87	5.29	5.63	5.45	8.81	6.89	6.3	7.62	6.51	8.4	7.64	11.01	5.31	10.13	12.24	11.49	8.93	14.43	7.94	7.21	7.3	5.73	6.05	9.54	6.73	9.95	11.34	8.68	9.88	6.1	6.52	9.49	0.46	7.11		Atg9	6.32333	7.91333	10.4217	7.295	7.626		Atg9	0.22	0.604031	-0.22	-0.234717	0.259626	0.365965
Atg10	4.38	3.98	4.31	3.81	4.78	4.98	3.75	2.58	5.59	3.73	5.58	4.76	11.58	15.33	17.75	17.57	15.39	18.92	5.06	4.22	4.21	4.07	3.53	11.68	12.83	26.51	30.86	31.71	28.86	7.5	7.06	23.05	7.6	14.18		Atg10	4.37333	4.33167	16.09	5.46167	19.016		Atg10	19.36	4.33773e-20	19.36	1.33118	0.137659	4.03797e-22
Atg12	61.44	73.29	53.09	62.52	65.37	64.93	57.05	47.05	52.72	47.34	66.05	62.18	67.38	45.26	66.35	69.76	47.14	73.77	52.04	62.01	63.29	54.03	51.61	64.6	52.99	68.24	62.86	47.77	51.48	53.59	55.3	62.32	30.6	51.69		Atg12	63.44	55.3983	61.61	57.93	53.684		Atg12	0.94	0.115635	-0.94	-0.423414	0.208111	0.0418948
Atg13	14.9	14.93	16.08	12.71	23.86	22.03	10.83	11.84	18.19	17.58	18.54	16.43	27.65	32.74	45.26	41.84	39.2	39.6	19.89	12.85	12.71	13.58	8.36	25.33	26.29	31.76	51.53	32.21	42.96	15.96	19.74	42.58	21.15	25.78		Atg13	17.4183	15.5683	37.715	15.4533	30.996		Atg13	5.67	2.16009e-06	5.67	0.704725	0.13434	1.55582e-07
Atg14	3.9	5.32	5.13	2.29	6.75	3.14	3.49	3	8.96	4.08	3.95	2.9	8.29	9.32	8.44	6.19	7.69	7.6	4.34	4.03	3.33	5.4	6.82	2.91	9.09	8.2	7.71	12.47	6.54	4.21	5.08	10.23	7.69	8.85		Atg14	4.42167	4.39667	7.92167	4.47167	8.007		Atg14	0.53	0.297614	0.53	0.337634	0.226912	0.136765
Atg16	2.56	3.71	2.62	2.96	4.66	2.62	2.47	2.59	3.66	4.44	3.16	3.39	3.32	4.51	3.67	5.16	3.79	4.51	3.64	3.22	2.63	2.8	2.63	3.02	5.48	4.83	4.01	4.03	4.46	2.92	3.72	4.45	3.4	4.5		Atg16	3.18833	3.285	4.16	2.99	4.18		Atg16	0.47	0.338083	-0.47	-0.234743	0.167767	0.161748
Atg17	8.11	11.37	8.68	8.25	15.2	11.86	7.83	8.76	14.06	10.58	10.3	8.86	11.44	16.77	22.25	21.59	16.41	15.37	14.07	9.16	9.53	9.03	7.69	9.93	10.13	11.08	15.82	16.32	21.3	7.57	8.67	16.48	7.9	10.35		Atg17	10.5783	10.065	17.305	9.90167	12.562		Atg17	0.61	0.246485	0.61	0.208515	0.129725	0.107976
Atg18a	5.83	6.49	5.18	4.58	5.03	5.82	4.51	7.28	7.64	6.27	7.52	5.57	6.66	12.81	11.48	13.33	12.92	9.63	7.01	7.72	5.67	5.13	5.4	6.72	7.15	10.93	12.55	9.07	10.72	5.68	3.29	9.74	11.86	8.43		Atg18a	5.48833	6.465	11.1383	6.275	8.942		Atg18a	0.31	0.489636	0.31	0.193222	0.17366	0.265861
Atg18b	1.03	1.93	1.3	1.54	2.28	2	1.09	2.45	3.61	1.82	2	1.28	4.77	6.78	6.05	6.01	6.33	5.7	1.42	2.96	1.88	1.56	1.08	3.3	4.44	4.74	5.23	5.75	5.26	2.44	2.4	5.84	1.98	3.27		Atg18b	1.68	2.04167	5.94	2.03333	4.135		Atg18b	3.95	0.000112528	3.95	0.985425	0.22648	1.35489e-05
Atg101	2.55	3.9	2.22	2.2	3.17	3.89	3.21	2.09	2.57	2.85	3.59	2.4	4	2.87	5.47	4.49	5.01	6.21	2.77	3.25	2.5	2.37	1.72	2.37	3.88	5.94	6.08	4.77	3.35	2.44	2.4	5.13	4.03	2.79		Atg101	2.98833	2.785	4.675	2.49667	4.081		Atg101	0.16	0.699	0.16	0.167396	0.228446	0.463706
atilla	8.99	8.76	9.56	12.35	16.27	9.89	13.05	8.06	4.92	17.15	22.99	18.19	124.47	223.39	317.68	279.37	226.15	340.94	9.26	10.53	13.3	12.05	9.75	190	167.13	439.54	470.16	422.39	398.21	98.29	158.92	423.69	140.92	272.02		atilla	10.97	14.06	252	40.815	299.127		atilla	19.41	3.92962e-20	19.41	3.47923	0.359387	3.63137e-22
atk	12.51	20.13	3.52	25.57	3.97	31.63	6.33	51.81	14.12	10.27	4.08	0.35	2.01	1	1.78	1.47	4.77	6.67	0.2	108.41	84.63	15.67	47.61	4.34	4.24	1.28	0.73	0.83	1.02	21.04	15.29	3.07	0.86	1.39		atk	16.2217	14.4933	2.95	43.4767	4.975		atk	2.71	0.00195846	-2.71	-2.7545	0.770837	0.000352381
atl	14.63	18.54	15.27	15.7	21.84	14.91	13.85	13.7	19.1	18.97	15.74	16.48	15.42	27.28	27.42	26.46	23.6	20.11	17.85	17.89	14.28	13.36	10.29	16.41	21.67	19.34	23.91	21.71	20.42	14.55	16.4	24.71	16.75	19.47		atl	16.815	16.3067	23.3817	15.0133	19.893		atl	0.09	0.804229	-0.09	-0.0701211	0.132737	0.597311
atms	0.71	0.58	0.64	0.76	0.63	0.77	0.65	0.38	0.75	0.48	0.7	0.64	0.54	0.82	0.82	0.65	0.87	0.6	0.38	0.53	0.53	0.68	0.5	0.56	0.65	0.88	0.96	1.13	0.81	0.55	0.67	0.76	1.26	0.69		atms	0.681667	0.6	0.716667	0.53	0.836		atms	0.81	0.15501	-0.81	-0.308644	0.164201	0.0601522
ato	0	0	0	0	1.92	0.25	0.62	1.5	0	0.98	0.66	0	0	0	0	0	0	0.69	0	0	1.3	0.81	0	0.73	0.36	0.14	0	0	0	0	0	0	0	0		ato	0.361667	0.626667	0.115	0.473333	0.05		ato	0.67	0.215336	-0.67	-2.12694	1.2589	0.0911185
Atox1	82.36	207.23	100.19	56.27	206.2	87.66	74.69	133.43	266.37	151.35	103.04	110.6	97.21	128.04	169.26	200.6	100.47	97.77	121.67	134.85	92.46	71.76	60.78	67.92	97.28	169.47	124.04	126.98	115.27	63.76	52.82	122.15	74.89	91.56		Atox1	123.318	139.913	132.225	91.5733	103.822		Atox1	1.21	0.0620344	-1.21	-0.624531	0.268169	0.019866
ATP6	3874.7	4254.24	5407.5	4776.8	5705.47	4605.11	7221.21	5363.75	5713.21	2827.56	4384.12	3779.52	5784.18	4412.06	4916.94	3925.77	5351.17	4107.92	4854.76	3935.72	3279.28	6762.13	7052.49	4831.57	6382.66	4672.83	4382.53	4992.21	3972.06	6576.94	6139.13	5199.19	6876.1	7364.16		ATP6	4770.64	4881.56	4749.67	5119.32	5655.78		ATP6	1.13	0.0735065	-1.13	-0.60937	0.270459	0.0242534
ATP7	5.5	6.49	6.8	4.71	6.61	8.25	5.75	3.86	8.65	5.53	7.54	4.65	8.02	7.74	8.27	9.33	7.35	8.72	7.02	6.17	4.09	5.05	2.55	5.03	9.3	8.45	8.01	8.01	8.69	6.28	3.72	10.32	6.08	7.2		ATP7	6.39333	5.99667	8.23833	4.985	7.606		ATP7	0.13	0.748866	-0.13	-0.0747499	0.116726	0.521921
ATP8	14.57	33.18	36.04	27.88	58.01	22.48	53.38	67.76	89.69	18.16	31.46	31.02	30.19	37.08	72.91	37.68	59	39.1	40.88	31.18	12.5	51.84	89.16	36.47	59.78	65.76	61	85.04	43.22	57.04	75.13	35.99	92	63.79		ATP8	32.0267	48.5783	45.9933	43.6717	63.875		ATP8	0.67	0.212183	-0.67	-0.647942	0.381398	0.0893457
ATP8B	6.46	13.47	11.8	3.03	9.3	9.39	7.74	6.99	13.26	11.45	14.35	7.53	48.49	24.05	33.61	34.71	32.96	29.3	16.57	11.08	7.88	5.92	5.42	31.24	50.41	36.18	49.59	50.76	48.74	21.57	20.97	55.82	47.83	36.74		ATP8B	8.90833	10.22	33.8533	13.0183	41.861		ATP8B	6.03	9.26242e-07	6.03	1.22467	0.226001	5.99788e-08
Atpalpha	11.75	15.84	14.64	14.3	22.64	24.41	13.94	12.58	12.61	16.93	14.65	12.49	26.17	23.31	35.07	31.19	24.12	26.12	14.88	10.98	13.11	16.41	11.9	31.8	27.05	23.56	34.1	30.51	38.42	18.19	20.8	37.31	21.47	25.96		Atpalpha	17.2633	13.8667	27.6633	16.5133	27.737		Atpalpha	1.34	0.045237	1.34	0.406742	0.164789	0.0135769
ATPCL	85.3	57.07	81.34	89.12	28.82	89.22	95.87	43.7	34.99	36.67	70.36	61.17	38.69	26.32	30.1	33.33	24.61	29.83	43.07	53.73	30.03	65.13	56.72	25.63	42.65	30.1	28.84	27.44	24.12	26.55	70.64	35.12	22.65	41.63		ATPCL	71.8117	57.1267	30.48	45.7183	34.974		ATPCL	4.5	3.12774e-05	-4.5	-1.47488	0.316442	3.14963e-06
ATPsynB	629.75	658.84	564.96	667.77	610.79	729.33	617.32	494.36	446.33	532.46	634.88	597.14	348.21	278.86	293.02	254.04	348.41	465.54	423.22	599.02	571.09	600.16	591.17	423.8	445.39	332.22	300.25	289.66	310.98	531.31	465.56	501.64	276.95	453.4		ATPsynB	643.573	553.748	331.347	534.743	390.736		ATPsynB	6.93	1.18838e-07	-6.93	-1.31815	0.226532	5.92694e-09
ATPsynbeta	534.79	530.34	402.14	585.83	405.94	422.15	518.82	413.32	256	382.05	466.08	449.66	214.66	185.71	211.3	203.93	191.59	286.86	345.46	406	393.42	502.19	456.69	344.62	287.76	232.32	203.11	172.38	200.6	382.22	353.94	241.25	139.45	334.15		ATPsynbeta	480.198	414.322	215.675	408.063	254.718		ATPsynbeta	7.6	2.50262e-08	-7.6	-1.54125	0.252793	1.08152e-09
ATPsynbetaL	2.5	1.47	1.12	1.87	15.24	1.24	2.16	1.36	18.55	0.47	1.12	0	1.69	4.43	0.14	3.46	10.64	4.72	1.99	4.78	0.32	3.13	0.11	0.4	2.49	0	1	12.8	2.44	6.2	3.05	7.8	2.44	2.56		ATPsynbetaL	3.90667	3.94333	4.18	1.78833	4.078		ATPsynbetaL	0.03	0.930831	-0.03	-0.206788	0.923402	0.822802
ATPsynC	1719.59	1794.34	1519.53	1779.15	1554.64	1957.5	1690.31	1331.19	995.98	1472.47	1749.52	1544.26	1304.64	584.76	776.51	708.57	936.36	1197.33	1229.64	1471.29	1394.87	1613.44	1578.92	1290.46	1319.91	704.32	775.77	684.51	789.2	1412.15	1296.78	1289.36	817.23	1185.25		ATPsynC	1720.79	1463.95	918.028	1429.77	1027.45		ATPsynC	3.58	0.000263816	-3.58	-1.22699	0.296889	3.58339e-05
ATPsynCF6	1137.23	1216.39	877.12	1155.39	968.21	1231.29	1001.64	830.92	645.37	1029.96	1171.68	1080.39	688.3	480.02	593.51	552.07	571.59	758.5	750.23	1067.36	905.96	1044.48	1027.93	866.24	823.65	582.78	537.08	483.41	497.11	833.82	848.75	828.28	502.48	787.4		ATPsynCF6	1097.61	959.993	607.332	943.7	672.476		ATPsynCF6	5.63	2.36081e-06	-5.63	-1.23784	0.236824	1.72445e-07
ATPsynCF6L	3.27	3.07	1.37	1.16	28.94	3.14	0.55	0.62	41.87	1.65	1	0.76	1.9	20.24	3.89	20.64	23.43	20.2	2.99	12.09	0	2.66	0	1.43	4.18	0	4.89	28.4	0.33	6.21	0.42	9.31	1.41	7.87		ATPsynCF6L	6.825	7.74167	15.05	3.195	6.302		ATPsynCF6L	0.14	0.724913	0.14	0.598712	0.874904	0.493775
ATPsynD	828.28	853.51	663.63	864.54	586.16	883.55	639.53	661	526.33	712.69	756.97	745.78	535.08	411.44	494.54	474.24	483.27	630.36	564.19	790.96	695.07	733.69	713.37	631.46	565.75	508.85	423.54	370.71	390.69	666.38	601.49	579.52	355.07	634.82		ATPsynD	779.945	673.717	504.822	688.123	509.682		ATPsynD	4.83	1.48008e-05	-4.83	-1.00402	0.207849	1.36171e-06
ATPsyndelta	237.95	225.73	163.86	237.58	193.73	272.61	197.41	170.51	107.89	175.09	238.59	196.8	107.88	88.41	114.7	95.5	86.53	139.42	146.84	172.71	157.92	203.33	203.88	139.48	128.39	95.08	85.6	71.03	76.53	148.21	127.45	121.6	73.27	139.33		ATPsyndelta	221.91	181.048	105.407	170.693	106.649		ATPsyndelta	6	1.00759e-06	-6	-1.36777	0.253166	6.56572e-08
ATPsynE	1044.36	874.86	848.47	1025.81	734.71	928.94	866.76	743.22	772.29	708.6	1106.27	904.88	662.78	485.52	511.11	523.89	607.87	730.88	690.41	867.8	789.33	988.56	932.1	692.9	753.36	585.81	468.99	422.21	429.7	815.11	571.51	610.91	431.17	688.43		ATPsynE	909.525	850.337	587.008	826.85	577.72		ATPsynE	6.07	8.57586e-07	-6.07	-1.09731	0.20193	5.50669e-08
ATPsynepsilonL	28.09	13.36	20.45	19.94	36.44	14.14	18.74	3.36	99.04	6.1	20.06	2.86	2.18	12.53	0.56	10.83	51.41	26.82	4.56	35.62	5.01	11.33	2.01	1.63	9.98	0	1.47	39.98	2.93	32.9	14.89	19.11	1.77	15.66		ATPsynepsilonL	22.07	25.0267	17.3883	10.0267	13.869		ATPsynepsilonL	0.24	0.576578	-0.24	-0.793408	0.829539	0.338848
ATPsynF	1613.1	1497.03	1098.67	1545.65	1136.63	1541.94	1346.1	1288.11	858.5	1204.38	1311.81	1367.45	755.18	641.16	715.86	700.7	682.4	905.31	873.38	1252.12	1244.54	1339.15	1415.86	949.81	950.42	805.28	642.59	589.88	501.14	1085.82	1029.38	774.62	604.73	960.52		ATPsynF	1405.5	1229.39	733.435	1179.14	794.438		ATPsynF	7.18	6.59127e-08	-7.18	-1.34524	0.227014	3.1082e-09
ATPsynG	1199.27	1168.65	1004.76	1132.87	1015.77	1269.1	1149.83	1014.33	820.34	1017.28	1186.28	1072.42	703.73	689.55	809.06	740.94	724.52	927.67	902.04	1119.15	987.88	1062.13	1125.65	824.71	912.26	787.3	742.26	664.08	661.43	953.95	924.57	924.21	593.74	906.33		ATPsynG	1131.74	1043.41	765.912	1003.59	807.013		ATPsynG	6.6	2.53622e-07	-6.6	-1.04359	0.183922	1.39423e-08
ATPsyngamma	626.17	576.43	466.09	623.6	512.5	600.07	553.25	504.73	326.9	465.71	526.69	539.16	273.53	244	264.13	256.52	250.44	358.18	354.62	551.13	497.49	548.44	577.33	425.21	365.4	278.45	259.83	244.15	201.87	446.26	424.58	312.55	217.48	396.27		ATPsyngamma	567.477	486.073	274.467	492.37	314.684		ATPsyngamma	7.47	3.35037e-08	-7.47	-1.42598	0.235905	1.49666e-09
ATPsynGL	8.38	2.67	4.47	3.64	32.79	5.17	2.52	0.61	85.37	1.78	6.3	0	3.58	42.13	5.37	9.61	33.54	38.01	2.08	21.37	0.24	7.53	0	0	10.35	1.15	1.87	25.53	8.03	11.02	9.55	22.4	2.16	24.52		ATPsynGL	9.52	16.0967	22.04	5.20333	11.658		ATPsynGL	0.02	0.947398	0.02	0.169883	0.969625	0.860918
ATPsynO	1045.73	1036.47	858.86	1042.76	777.4	958.18	904.41	812.52	606.83	786.21	928.75	901.19	536.01	395.77	433.68	445.98	465.61	688.31	658.31	927.07	823.94	850.4	919.61	724.91	704.36	626.14	416.37	394.75	399.19	754.18	694.43	641.93	373.03	701.6		ATPsynO	953.233	823.318	494.227	817.373	570.598		ATPsynO	6.3	4.97713e-07	-6.3	-1.32169	0.238518	3.00312e-08
att-ORFB	2.38	2.53	2.99	2.1	5.57	3.33	2.2	2.95	4.83	3.03	1.43	2.85	2.7	6.67	5.39	6.38	6.51	6.03	2.16	3.44	3.03	4.08	2.56	2.48	3.56	4.86	4.78	3.18	5.26	2.51	2.03	5.09	0.46	3.67		att-ORFB	3.15	2.88167	5.61333	2.95833	3.54		att-ORFB	0.42	0.378566	0.42	0.371707	0.282396	0.188087
AttA	0	0	0	3.41	1.72	0.36	0	0	0	0.31	0	0	3.35	0.18	0	0.99	16.83	2.97	0	10.5	0	0.17	1.58	116.76	8.66	14.49	0	240.1	14.51	2.46	4.02	0	0	8		AttA	0.915	0.0516667	4.05333	21.5017	29.224		AttA	2.56	0.00274792	2.56	4.10368	1.1826	0.000520381
AttB	13.06	22.32	17.91	24.18	32.85	22.18	11.92	10.15	17.81	18.36	20.53	15.43	42	38.39	33.83	28.77	83.22	47.74	15.44	34.72	14.26	14.82	10.64	296.04	52.29	77.07	25.13	451.02	75.22	21.83	23.46	49.04	30.58	42.35		AttB	22.0833	15.7	45.6583	64.32	84.799		AttB	2.79	0.00160635	2.79	0.984509	0.271091	0.000281605
AttC	3.2	0.83	7.54	11.19	2.74	1.05	8.31	2.04	4.05	12.22	5.83	0.2	8.3	16.85	1.27	5.55	94.1	8.51	1.82	2.59	0.6	7.91	6.1	416.11	51.21	61.65	4.42	720.52	60.42	19.27	4.01	3.9	6.73	157.88		AttC	4.425	5.44167	22.43	72.5217	109.001		AttC	0.63	0.232105	0.63	1.33446	0.811606	0.100132
AttD	0.88	1.4	0.19	0.36	1.79	6.24	0	1.05	0	0	0	0	94.38	3.81	3.75	17.6	29.13	21.24	0.46	0.83	0.18	0	1.64	31.69	16.43	25.18	2.55	56.77	30.83	3.3	13.46	9.65	10.29	59.88		AttD	1.81	0.175	28.3183	5.8	22.834		AttD	5.21	6.13588e-06	5.21	5.31334	1.05757	5.05745e-07
Atu	5.92	6.09	5.26	3.44	7.51	5.88	3.66	3.9	5.21	5.18	4.08	3.54	6.28	6.95	8.47	8.83	5.73	6.87	6.75	3.47	3.47	4.89	4.76	5.86	5.64	6.82	5.66	5.93	7.6	4.83	2.97	7.16	2.7	3.49		Atu	5.68333	4.26167	7.18833	4.86667	5.28		Atu	0.35	0.445193	0.35	0.184514	0.154848	0.233426
Atx-1	0.62	0.34	0.47	0.44	0.88	0.62	0.32	0	1.02	2.01	0.69	0.52	0	1.4	1.38	2.88	1.44	2.2	0.37	0.45	1.3	0.85	0.61	1.25	0.44	2.06	1.93	0.36	2.52	0.75	0	1.98	0	1.93		Atx-1	0.561667	0.76	1.55	0.805	1.197		Atx-1	0.13	0.736949	0.13	0.462819	0.698497	0.507592
Atx2	18.81	21.67	19.66	17.87	25.37	28.65	19.46	12.72	24.63	21.66	26.52	16.54	53.4	38.89	48.24	49.95	51.06	54.79	23.63	14.89	17.79	20.26	13.33	40.22	45.22	39.37	59.52	52.17	62.65	31	26.94	59.63	42.81	45.18		Atx2	22.005	20.255	49.3883	21.6867	46.449		Atx2	5.43	3.72613e-06	5.43	0.754811	0.147111	2.88378e-07
Atxn7	1.8	2.5	2.57	2.72	3.78	3.35	3.15	3.26	5.43	3.27	2.38	2.88	3.07	5.35	6.34	5.01	6.99	4.24	2.68	2.65	3.35	1.97	2.7	3.07	3.55	6.55	5.03	4.54	5.36	2.67	2.7	4.96	5.76	2.63		Atxn7	2.78667	3.395	5.16667	2.73667	4.375		Atxn7	0.02	0.957923	0.02	0.0301632	0.212095	0.88691
aub	1.36	0.53	1.27	0.88	1.93	0.76	0.78	0.03	2.27	0.55	1.16	0.84	0.07	0.53	0.84	1	1.08	1.34	0.94	0.74	0.2	0.12	0.15	0.27	0.32	0.16	0.48	0.93	1.66	1.05	0.59	1.97	0.58	0.22		aub	1.12167	0.938333	0.81	0.403333	0.796		aub	0.28	0.519454	-0.28	-0.653649	0.617556	0.289852
aurA	7.23	9.34	11.95	3.51	16.55	10.01	7.87	6.01	21.58	10.6	9.31	6.28	13.24	21.94	21.84	25.83	19.41	19.89	12.44	9.3	9.38	7.25	5.53	8.36	15.28	21.29	17.93	19.98	19.21	8.69	7.23	18.45	11.51	12.65		aurA	9.765	10.275	20.3583	8.71	15.222		aurA	1.04	0.0907352	1.04	0.474125	0.220113	0.0312397
aurB	16.05	33.04	33.68	13.47	26.92	30.32	19.24	11.15	50.61	34.81	27.62	23.03	37.13	42.68	44.43	46.89	35.65	31.36	40.04	23.96	20.06	19.68	13.86	23.86	29.96	59.04	35.53	27.31	36.96	19.68	14.67	44.46	33.95	33.74		aurB	25.58	27.7433	39.69	23.5767	33.53		aurB	0.01	0.976327	0.01	0.0171057	0.236829	0.942421
aust	0.31	0.11	0	0.15	2.8	0.62	0.33	0.68	1.93	0.4	0.12	0	0	1.41	0.08	1.11	1.88	0.76	0.88	0.51	0	0.28	0.12	0.45	0.52	0.35	0.4	1.52	0	0.76	0.86	1.49	0	0		aust	0.665	0.576667	0.873333	0.373333	0.59		aust	0.02	0.955367	0.02	0.125719	0.841961	0.881303
aux	2.84	2.52	2.88	2.32	2.86	2.51	2.56	1.65	2.97	2.08	2.76	2.38	3.21	3.55	3.95	3.94	4.02	3.43	2.9	3.06	1.99	2.58	2.57	2.06	3.5	4.3	4.04	3.72	3.81	2.7	2.14	3.48	1.81	3.28		aux	2.655	2.4	3.68333	2.52667	3.278		aux	0.09	0.820424	0.09	0.0534333	0.107921	0.62052
ave	5.62	9.24	8.32	5.54	8.23	6	5.2	5.9	23.78	7.14	10.25	6.62	14.01	18.85	20.79	23.88	16.41	17.48	19.52	9.02	3.77	4.33	8.5	14.58	22.01	18.01	18.77	18.08	26.36	11.23	11.28	11.87	17.3	12.75		ave	7.15833	9.815	18.57	9.95333	16.766		ave	0.55	0.282857	0.55	0.43386	0.285156	0.128138
Aven	3.35	5.98	4.47	3.21	6.24	2.86	2.42	3.72	7.7	4.47	6.22	3.7	3.47	6.32	4.65	7.47	8.42	6.98	3.98	5.63	3.87	4.28	2.31	5.21	7.39	7.3	6.95	4.63	4.15	4.73	5.01	6.92	6.12	3.17		Aven	4.35167	4.705	6.21833	4.21333	5.637		Aven	0.09	0.812665	-0.09	-0.124067	0.242677	0.609181
awd	2831.1	3090.52	2898.3	2815.63	2607.12	3080.86	2489.26	2088.42	2158.06	2348.26	2680.5	2556.41	2502.8	2313.96	3015.35	2687.63	2244.96	2956.69	2899.18	2049.86	1789.93	2322.44	2349.18	2008.24	3150.37	3102.4	2535.52	2060.24	2165.55	2063.87	2181.59	2840.83	2383.82	2328.81		awd	2887.25	2386.82	2620.23	2236.47	2481.3		awd	1.73	0.0186528	-1.73	-0.453608	0.160945	0.00482639
Awh	0.62	0.27	0.44	0.67	0.57	0.45	0.38	0.51	0.09	0.37	0.31	0.38	0.06	1.03	0.55	0.35	0.56	0.47	0.54	0.14	0.39	0.6	0.18	0.66	0.49	0.24	1.11	1.16	1.25	0.25	0.38	0.08	0.63	0.15		Awh	0.503333	0.34	0.503333	0.418333	0.574		Awh	0.04	0.909675	-0.04	-0.148363	0.530688	0.77981
axed	2.22	3.55	3.71	1.99	3.48	3.81	2.51	1.78	3.28	3.15	4.32	2.84	13.74	30.05	41.84	41.08	33.26	31.28	5.82	2.4	2.64	2.57	2.38	26	15.8	36.65	54.3	47.99	51.66	8.75	14.66	42.5	11.39	25.78		axed	3.12667	2.98	31.875	6.96833	30.948		axed	36.52	2.98571e-37	36.52	2.82291	0.214121	1.08887e-39
Axn	2.15	2.29	2.28	1.81	3.19	2.67	1.98	1.51	3.44	2.59	2.2	1.89	3.12	3.47	3.87	4.43	3.61	3.86	2.43	1.86	2.4	1.82	1.13	2.74	2.69	3.23	3.6	4.19	4.3	1.71	1.95	3.89	3.23	2.74		Axn	2.39833	2.26833	3.72667	2.06333	3.153		Axn	0.49	0.322656	0.49	0.168348	0.117567	0.152164
axo	0.95	0.59	0.46	0.85	0.47	0.36	0.5	0.49	1.19	0.45	0.7	0.63	0.52	0.89	0.4	0.37	0.84	0.41	0.25	1	0.33	0.48	0.68	0.49	0.37	0.28	0.4	1.25	0.69	0.92	0.58	0.44	0.81	0.87		axo	0.613333	0.66	0.571667	0.538333	0.661		axo	1.38	0.0413221	-1.38	-0.716464	0.286068	0.0122616
Axs	2.04	3.76	3.17	3.04	3.78	2.34	2.14	2.06	2.36	4.39	2.69	3.53	4.2	6.93	5.76	7.01	5.17	4.84	2.46	1.46	2.47	2.3	2.99	3.83	5.48	7.72	5.19	6.67	6.87	2.45	3.12	5.66	3.15	4.3		Axs	3.02167	2.86167	5.65167	2.585	5.061		Axs	0.58	0.260123	0.58	0.37917	0.24092	0.115524
Axud1	7.22	8.53	7.79	5.68	12.71	9.55	6.07	6.6	7.68	9.15	8.06	6.84	13.04	13.71	17.54	17.72	16.93	13.96	8.56	6.93	7.44	6.98	5.78	12.16	10.12	11.7	16.53	19.29	17.29	11.16	5.23	14.93	11.66	6.76		Axud1	8.58	7.4	15.4833	7.975	12.467		Axud1	2.91	0.00123541	2.91	0.485543	0.130917	0.000208266
az2	0.63	1.83	1.41	0.68	2.07	1.38	0.76	0.4	1.81	2.01	1.02	0.74	0.22	1.91	2.09	3.11	3.78	3.02	2.58	1.6	1.5	1.46	1.55	0.93	1.74	4.2	3.85	3.18	3.13	1.55	1.82	1.21	0.15	1.4		az2	1.33333	1.12333	2.355	1.60333	2.223		az2	0.29	0.507429	0.29	0.509488	0.47131	0.279695
azot	0.41	0.64	0.42	0.58	4.14	0.08	0.34	0	9.02	0.46	0.43	0.42	0	8.13	0.16	1.67	5.27	3.1	0.07	0.75	0	0.34	0	0.9	0.59	0	1.41	11.13	3.05	0.4	0.23	2.1	1.81	0.88		azot	1.045	1.77833	3.055	0.343333	2.16		azot	0.07	0.854452	0.07	0.422335	1.00709	0.674953
b	1.69	1.63	1.96	1.52	1.67	1.45	1.68	0	1.24	1.17	1.95	1.5	2.4	1.2	1.6	1.02	1.16	1.02	1.58	1.5	0.98	1.42	0.27	1.31	2.25	1.19	0.74	1.5	0.46	0.72	1.31	2.53	0.89	1.22		b	1.65333	1.25667	1.4	1.17667	1.281		b	0.1	0.797433	-0.1	-0.315689	0.581485	0.587198
B-H1	0.14	0.1	0	0.2	0.25	0.35	0.15	0.02	0	0.46	0.2	0.04	0.04	0.22	0.16	0.26	0.2	0.15	0.19	0	0.37	0.17	0.4	0.03	0.05	0.09	0.22	0.58	0.44	0.08	0.15	0	0.39	0.18		B-H1	0.173333	0.145	0.171667	0.193333	0.218		B-H1	0.07	0.855385	-0.07	-0.31969	0.765857	0.676366
B-H2	0.3	0.19	0.08	0.32	0.34	0.21	0	0	0.28	0.21	0.19	0.08	0.3	0.67	0.48	0.04	0.51	0.21	0.13	0.02	0.32	0.18	0.19	0.17	0.57	0.27	0.54	0.8	1.44	0.27	0.16	0.35	0.3	0		B-H2	0.24	0.126667	0.368333	0.168333	0.47		B-H2	0.38	0.415635	0.38	1.00428	0.807462	0.213593
B4	1.04	1.22	1.21	0.98	1.84	1.61	1.08	1.06	1.77	1.6	1.71	0.84	3.91	2.76	2.58	3.15	3.17	3.08	1.13	1.15	0.96	1.21	0.8	2.58	3.35	2.5	3.62	3.69	4.2	1.85	1.87	3.72	3.43	2.35		B4	1.31667	1.34333	3.10833	1.305	3.058		B4	2.83	0.00147994	2.83	0.692237	0.18935	0.000256327
b6	0.09	0	0.07	0.12	0.08	0.48	0.2	0.03	0	0.13	0.45	0.11	0.13	0.04	0.06	0.05	0.06	0.09	0	0.06	0.06	0.3	0	0.35	0.23	0.07	0.02	0.15	0.16	0.06	0	0.5	0.5	0.15		b6	0.14	0.153333	0.0716667	0.128333	0.184		b6	0.7	0.198017	-0.7	-1.39125	0.799358	0.0817796
B9d1	6.16	1.14	2.37	0.87	13.52	1.4	0.22	0	20.15	2.14	1.72	0.39	0.72	9.53	0.46	4.07	13.81	11.5	3.13	8.07	0.43	1.84	0.12	0.36	4.74	0.52	0.32	8.56	2.53	4.81	5.16	7.32	2.59	6.66		B9d1	4.24333	4.10333	6.68167	2.325	4.321		B9d1	0.06	0.874523	0.06	0.357103	0.964816	0.711289
B9d2	0.3	0.16	0.26	0.13	1.69	0.25	0.16	0	2.2	0.02	0.02	0	0	0.65	0.03	0.27	1.86	0.58	0.31	0.51	0.03	0.23	0	0.1	0.19	0.06	0	0.74	0	0.65	0.41	0.57	0	0.5		B9d2	0.465	0.4	0.565	0.196667	0.312		B9d2	0.02	0.948807	0.02	0.187813	1.10255	0.864739
B52	27.34	28.67	33.65	26.96	35.1	36.59	34.38	20.26	35.09	31.88	35.4	24.56	34.75	44.59	58.82	47.66	43.55	46	37.16	21.9	24.05	26.76	21.67	29.96	49.28	45.87	45.66	36.68	50.92	27.81	27.38	45.68	36.05	32.23		B52	31.385	30.2617	45.895	26.9167	39.756		B52	0.04	0.90186	0.04	0.0348102	0.115717	0.763551
bab1	0.39	0.1	0.19	0.29	0.2	0.18	0.1	0.11	0.28	0.23	0.29	0.12	0.39	0.67	0.3	0.27	0.61	0.26	0.23	0.19	0.13	0.15	0.16	0.36	0.49	0.2	0.7	1.1	0.83	0.32	0.19	0.25	1.26	0.14		bab1	0.225	0.188333	0.416667	0.203333	0.548		bab1	0.9	0.125274	0.9	0.643544	0.322843	0.0462212
bab2	1.08	1.09	0.88	1.18	1.27	1.14	1	0.82	1.06	0.86	1.33	0.66	0.72	1.23	1.11	1.3	1.17	0.92	0.55	1.03	0.77	1.13	0.8	1.3	0.73	0.67	1.2	1.64	1.75	1.01	1.22	0.98	0.81	1.63		bab2	1.10667	0.955	1.075	0.93	1.164		bab2	1.68	0.0207385	-1.68	-0.39877	0.143496	0.00545342
babo	7.98	8.33	7.55	6.3	10.95	10.95	6.42	5.92	7.4	9	10.47	7.05	14.23	13.52	19.71	18.12	15.94	13.97	10.54	6.29	7.72	6.99	5.62	11.91	11.96	11.42	17.61	17.24	18.09	9.25	9.54	17.52	9.11	10.32		babo	8.67667	7.71	15.915	8.17833	13.206		babo	2.28	0.00526945	2.28	0.477712	0.146412	0.00110316
babos	2.1	1.88	2.27	2.89	2.31	2.03	2.95	1.63	1.13	1.58	1.76	1.67	0.35	0.36	0.25	0.17	0.64	1.48	1.78	1.55	1.52	3.15	2.76	2.25	0.79	0.02	0.16	0.67	0.62	1.75	2.35	0.72	0.51	1.4		babos	2.24667	1.78667	0.541667	2.16833	0.899		babos	4.33	4.65828e-05	-4.33	-2.25529	0.493821	4.94726e-06
Bacc	61.59	113.05	83.14	63.09	212.59	121.81	110.62	97.01	147.16	105.06	83.25	77.51	97.65	182.84	238.44	181.22	131.33	115.64	161.83	64.7	86.03	112.25	96.3	118.49	102.4	120.77	149.2	136.4	193.1	77.03	88.24	139.58	109.72	95.48		Bacc	109.212	103.435	157.853	106.6	121.192		Bacc	0.01	0.968649	0.01	0.0200082	0.207673	0.923247
Bace	0.36	0.04	0	0.36	0	0.22	0	0.3	0.08	0.28	0.16	0	0.51	0.11	0	0	0.05	0.12	0	2.81	0.61	0.25	2.12	0.32	10.03	0.55	0	0	0	0.32	0.05	0.21	0	0		Bace	0.163333	0.136667	0.131667	1.01833	1.116		Bace	0.09	0.813421	-0.09	-0.536804	1.05344	0.610351
baf	62.05	76.98	92.77	49.94	91.64	91.65	64.32	44.38	84.6	70.84	90	58.82	118.31	115.33	128.17	121.4	108.58	136.63	78.77	67.64	49.52	56.51	38.36	78.4	147.46	149.72	118.98	114.24	107.7	82	61.09	147.95	120.47	101.07		baf	77.505	68.8267	121.403	61.5333	115.068		baf	1.33	0.0469795	1.33	0.277272	0.113037	0.0141701
bai	184.97	253.29	207.22	189.85	204.74	235.47	166.88	172.8	237.29	205.97	207.98	187.85	272.01	214.15	256.82	249.01	235.27	232.37	255.6	194.63	166.53	146.62	167.65	200.68	311.75	290.25	251.98	202.87	230.51	236	168.69	297.36	234.06	233.03		bai	212.59	196.462	243.272	188.618	245.65		bai	0.8	0.158084	-0.8	-0.248053	0.132721	0.0616244
Baldspot	27.14	41.51	31.37	25.59	26.91	35.02	31.05	30.34	31.44	31.95	34.47	36.87	66.56	59.14	87.77	77.42	64.56	65.11	32.75	31.65	23.06	25.18	23.3	53.8	69.53	76.98	94.38	89.4	97.59	39.34	50.52	97.64	62.73	65.3		Baldspot	31.2567	32.6867	70.0933	31.6233	74.341		Baldspot	2.02	0.00944427	2.02	0.503752	0.164238	0.00216069
ball	9.78	8.54	10.1	6.68	15.8	11.61	7.19	6.18	20.94	11.17	10.97	5.57	10.07	13.53	12.67	16.32	11.61	11.5	11.17	5.2	10.04	7.88	5.61	7.8	11.28	12.48	19.07	18.68	11.77	7.23	4.55	13.37	9.27	10.42		ball	10.4183	10.3367	12.6167	7.95	11.812		ball	0.23	0.588223	-0.23	-0.208093	0.22262	0.34992
bam	1.09	0.74	3.09	1.37	1.24	0.46	0.83	0.97	2.8	0.5	0.88	1.29	0.83	2.28	2.01	1.47	2.14	0.96	1.36	1.6	0.32	0.84	0.3	0.8	1.28	1.15	0.84	3.49	2.61	2.16	0.57	0.98	1.77	1.39		bam	1.33167	1.21167	1.615	0.87	1.624		bam	0.04	0.907175	-0.04	-0.110781	0.386947	0.774653
ban	0.63	0	2.92	0	0	0.96	1.33	0	0	0	2.83	3.22	0	0	6.63	0	0	0	0	0	0	1.74	0	3.32	8.21	0	0	0	0	2.78	0.88	0	14	0		ban	0.751667	1.23	1.105	0.843333	2.587		ban	0	NA	0	-0.320382	1.34663	0.811948
bap	0.85	0	1.11	0.65	0.37	0.2	0	0.23	0	0	0.44	0.17	0	0	0	0	0	0.22	0.4	1.01	0	0.45	0	0.11	0	0	0	0	0	0	1.19	0	0	0.22		bap	0.53	0.14	0.0366667	0.328333	0.141		bap	0.29	0.507933	-0.29	-1.43742	1.33076	0.280076
Bap55	26.12	35.25	31.98	21.02	45.12	38.09	23.15	13.21	25.69	34.36	28.62	20.3	38.87	39.42	45.32	44.15	29.26	39.53	38.04	25.19	19.39	19.41	18.92	26.56	40.84	46.98	36.35	34.28	33.27	24.72	21.73	43.92	19.91	31.75		Bap55	32.93	24.2217	39.425	24.585	33.375		Bap55	0.18	0.653227	0.18	0.154869	0.189834	0.414608
Bap60	19.29	26.68	26.07	19.37	34.36	29.99	19.14	18.01	23.64	26.33	23.89	20.55	28.2	34.28	46.37	46.41	26.6	39.57	29.24	21.64	20.22	21.13	18.83	28.71	33.2	44.25	35.26	32.93	38.2	16.78	17.86	32.08	39.79	23.93		Bap60	25.96	21.9267	36.905	23.295	31.428		Bap60	0.29	0.507527	0.29	0.168924	0.156294	0.279783
Bap111	11.04	14.49	14.31	12.01	20.14	10.34	11.22	11.4	19.49	13.58	17.13	12.08	8.49	19.59	18.8	24.08	16.86	23.23	17.19	9.61	11.17	11.59	10.05	12.21	17.9	20.74	17.65	17.23	20.22	10.81	6.23	16.81	11.17	13.39		Bap111	13.7217	14.15	18.5083	11.97	15.215		Bap111	0.27	0.533018	-0.27	-0.181257	0.175106	0.300608
Bap170	3.35	2.9	3.05	2.42	6.45	4.29	2	1.55	5.01	3.84	3.39	2.66	3.18	4.32	6.09	4.64	6.69	4.8	4.5	3.57	2.55	2.7	2.43	3.18	5.29	4.06	4.18	4.23	4.97	3.84	1.64	5.76	2.94	3.68		Bap170	3.74333	3.075	4.95333	3.155	4.059		Bap170	0.16	0.693218	0.16	0.159217	0.214259	0.45742
barc	11.63	11.98	12.84	14.64	10.99	12.75	12.05	9.91	7.15	10.63	10.6	10.73	11.23	10.22	13.23	11.27	12.06	13.64	12.46	8.24	9.15	13.23	10.97	17.36	13.56	10.55	13.59	12.33	13.74	12.54	17.1	14.09	10.66	15.86		barc	12.4717	10.1783	11.9417	11.9017	13.402		barc	0.74	0.183123	-0.74	-0.378914	0.212149	0.0740877
bark	0.64	0.41	0.47	0.42	1.04	0.62	0.42	0.98	0.54	0.95	0.5	0.39	0.54	0.24	0.09	0.08	0.33	0.26	0.15	1.03	0.56	0.83	0.86	0.46	0.15	0.23	0.39	0.41	0.18	0.6	0.43	0.1	0	0.42		bark	0.6	0.63	0.256667	0.648333	0.291		bark	2.6	0.00253955	-2.6	-1.7894	0.512114	0.000475572
barr	5.79	7.59	7.82	3.41	16.57	10.38	6.54	5.09	14.87	9	7.07	5.13	4.61	13.28	11.33	13.69	11.11	13.27	10.83	5.73	7.98	5.28	3.43	8.82	7.1	8.84	9.17	11	9.87	6	6.2	13.86	6.06	5.95		barr	8.59333	7.95	11.215	7.01167	8.405		barr	0.02	0.948375	-0.02	-0.0412704	0.239227	0.863032
baz	1.8	1.56	1.85	2.02	3.23	2.8	1.7	1.91	2.17	2.37	2.11	1.63	2.38	3.61	3.6	3.25	4.13	3.7	1.87	2.27	2.4	1.92	2.07	3.11	2.17	2	4.3	4.03	4.87	2.16	1.98	3.13	2.53	2.36		baz	2.21	1.98167	3.445	2.27333	2.953		baz	0.66	0.218507	0.66	0.213259	0.126934	0.0929437
bb8	1.25	0.46	0.72	0.3	8.19	0.63	0	1.06	17.94	0.51	0.64	0	0.85	6.56	0.62	1.89	7.94	6.93	2.09	2.76	0.15	1.07	0.06	0.27	0.6	0.44	1.38	9.39	2.56	2.21	1.2	5.91	1.15	3.55		bb8	1.925	3.35833	4.13167	1.06667	2.839		bb8	0	0.994798	0	0.0188635	1.03307	0.985432
bbc	21.36	27.17	21.7	18.94	25.23	26.19	21.71	17.57	25.61	24.13	29.74	17.46	27.77	21.56	30.03	26.91	28.31	26.16	25.98	25.33	14.54	16.81	13.82	22.61	31.76	23.55	33.29	31.37	33.58	15.49	17.75	40.45	23.62	26		bbc	23.4317	22.7033	26.79	19.8483	27.686		bbc	1.29	0.0515716	-1.29	-0.306842	0.127217	0.0158671
bbg	1.44	1.75	1.12	1.79	1.4	1.69	1.18	1.84	1.28	1.67	1.65	1.02	1.63	0.96	1.04	1.07	1.08	0.9	0.96	2.05	1.43	1.61	1.55	1.47	1.12	0.67	1.26	1.58	1.72	1.7	1.35	1.09	1.4	1.61		bbg	1.53167	1.44	1.11333	1.51167	1.35		bbg	2.53	0.00297223	-2.53	-0.922725	0.267706	0.000567302
BBS1	193.11	14.31	11.69	143.47	19.43	379.79	222.84	204.59	208.37	357.86	46.84	2.65	4.58	5.46	0.42	0.34	7.04	0.92	1.24	2.82	284.27	147.01	244.87	53.89	171.14	6.4	1.85	1.37	0.78	1.87	0.65	1.47	0.66	2.57		BBS1	126.967	173.858	3.12667	122.35	18.876		BBS1	10.05	8.87705e-11	-10.05	-5.69073	0.811216	2.29846e-12
BBS4	0.03	0	0	0	0.3	0	0.06	0	0	0	0	0.04	0	0	0.14	0	0.06	0	0	0.03	0.32	0.62	0.07	0	0	0	0	0	0	0.09	0.11	0.06	0	0		BBS4	0.055	0.0166667	0.0333333	0.173333	0.026		BBS4	0	NA	0	0.239158	1.34258	0.858619
BBS8	0.04	0	0	0	0	0.19	0.04	0	0	0.38	0	0	0	0	0	0	0.06	0.07	0	0	0.06	0.06	0	0.29	0	0	0	0.29	0.09	0.06	0	0.08	0	0		BBS8	0.0383333	0.07	0.0216667	0.0683333	0.052		BBS8	0.2	0.626061	-0.2	-1.16564	1.35084	0.388191
bbx	1.72	2.57	2.3	2.04	2.57	2.29	2.13	2.32	3.33	2.24	2.56	2.18	2.5	4.52	3.5	3.98	3.45	2.58	2.39	2.45	2.97	1.89	2.21	2.59	2.56	3.71	4.08	4.29	3.98	1.8	2.87	3.35	1.93	2.51		bbx	2.24833	2.46	3.42167	2.41667	3.108		bbx	0.13	0.74349	-0.13	-0.0958516	0.147395	0.515495
bc10	17.98	36.81	21.8	21.26	32.14	22.61	21.83	30.44	29.61	27	24.25	20.58	36.06	27.04	44.07	38.22	39.51	28.39	25.96	22.18	22.14	23.54	14.91	28.57	34.77	26.31	44.7	41.32	38.58	25.75	22.02	46.74	17.31	37.66		bc10	25.4333	25.6183	35.5483	22.8833	33.516		bc10	0.1	0.787039	-0.1	-0.11121	0.19655	0.571522
BCAS2	15.38	20.98	17.63	12.21	27.89	23.81	13.59	13.13	20.21	23.53	19.84	14.95	13.77	27.17	24.71	25.89	22.75	23.59	22.1	13.53	14.27	13.67	11.63	18.83	20.79	27.52	16.01	27.53	24.36	17.07	9.73	24.47	15.39	12.88		BCAS2	19.65	17.5417	22.98	15.6717	19.575		BCAS2	0.34	0.457858	-0.34	-0.173463	0.148419	0.242509
bcd	0.03	0	0.09	0.16	0.32	0.04	0	0.03	0.09	0.07	0.19	0.18	1.71	0	0.08	0.09	0.12	0.47	0.07	0.22	0.16	0.08	0.03	0	0	0.05	0.09	0.05	0.44	0	0	0.11	0	0.19		bcd	0.106667	0.0933333	0.411667	0.0933333	0.093		bcd	0.54	0.290083	0.54	1.4783	0.981794	0.132141
bchs	0.39	0.77	0.56	0.64	1.53	1.02	0.44	0.93	0.85	1.22	0.62	0.62	0.72	2.62	2.46	2.23	1.95	2.15	0.88	0.71	0.85	0.71	0.43	1.65	1.36	1.4	1.83	2.21	1.93	0.66	0.97	1.56	0.39	1.16		bchs	0.818333	0.78	2.02167	0.871667	1.347		bchs	1.28	0.0524776	1.28	0.746849	0.310712	0.0162314
BCL7-like	2.2	3.47	2.98	2.9	5.39	2.73	2.59	4.94	5.79	2.9	2.07	2.86	2.25	3.98	4.34	5.58	3.77	3.49	4.97	1.97	1.59	3.78	2.18	4.61	3.2	4.47	5.2	7.77	5.97	5.25	2.52	5.24	3.14	5.54		BCL7-like	3.27833	3.525	3.90167	3.18333	4.83		BCL7-like	0.51	0.307835	-0.51	-0.43746	0.298708	0.143055
bcn92	98.51	115.49	121.26	106.58	74.59	74.21	137.28	91.65	94.75	49.75	96.55	79.14	58.89	48.06	64.98	57.66	50.58	47.75	80.66	70.39	38.14	113.87	78.97	38.14	81.11	73.73	57.36	57.05	56.08	49.64	101.69	66.21	44.16	60.09		bcn92	98.44	91.52	54.6533	70.0283	64.712		bcn92	5.51	3.07757e-06	-5.51	-1.32131	0.255504	2.32329e-07
Bdbt	22.78	27.68	26.35	17.04	30.83	32.15	24.21	13.61	30.08	19.79	28.35	18.53	42.94	31.29	45.48	37.72	28.75	42.06	19.37	19.86	18.08	24.77	17.26	27.39	43.03	39.26	28.6	23.34	26.17	30.43	19.83	39.92	42.28	25.57		Bdbt	26.1383	22.4283	38.04	21.1217	31.843		Bdbt	0.38	0.415285	0.38	0.229399	0.184327	0.213309
bdg	5.96	4.63	5.66	3.64	8.02	7	5.89	4	11.06	5.89	9.31	5.81	11.02	13	14.74	11.44	18.35	17.11	7.58	8.42	5.51	4.65	3.32	10.3	12.7	12.38	15.23	13.12	13.34	9.85	6.92	19.13	13.48	10.26		bdg	5.81833	6.99333	14.2767	6.63	12.641		bdg	1.88	0.0132778	1.88	0.506288	0.171906	0.00322809
bdl	0.44	0.47	0.41	0.86	0.28	1.21	1.2	0.51	0.47	0.73	0.54	0.34	0	2.1	4.03	2.68	1.19	1.65	0.39	0.42	0.52	1.38	0.47	0.66	0.2	1.53	1.79	2.99	1.8	0.5	1.08	0.87	0.71	0.29		bdl	0.611667	0.631667	1.94167	0.64	1.176		bdl	0.45	0.357298	0.45	0.892249	0.656398	0.174048
Bdp1	9.91	11.56	10.82	8.4	12.16	10.19	8.55	4.78	16.98	8.74	11.53	6.41	7.65	12.98	15.5	13.49	11.02	10.9	9.03	6.03	5.99	8.71	7.5	7.27	13.14	10.95	18.58	18.29	14.72	6.22	5.87	17.89	6.44	9.17		Bdp1	10.5067	9.49833	11.9233	7.42167	12.127		Bdp1	0.25	0.568436	-0.25	-0.188699	0.19429	0.331437
be	1.27	1.58	1.75	1.53	1.79	1.55	1.18	1.61	1.76	1.69	1.39	1.47	2.56	4.75	5.78	4.94	5.15	4.02	2.08	1.96	1.69	1.16	1.26	2.03	2.22	4.25	5.17	4.29	5.45	1.49	2.06	3.4	2.05	2.49		be	1.57833	1.51667	4.53333	1.69667	3.287		be	6.03	9.42564e-07	6.03	0.969149	0.178969	6.12279e-08
BEAF-32	9.09	14.79	13.1	9.84	22.82	10.25	11.62	9.73	16.16	11.87	11.52	7.91	10.65	15.45	19.83	22.62	13.26	14.18	18.98	7.32	9.37	10.94	9.4	9.48	17.58	17.68	14.53	18.75	16.08	10.53	7.38	16.09	8.32	12.36		BEAF-32	13.315	11.4683	15.9983	10.915	13.93		BEAF-32	0.09	0.80442	-0.09	-0.0858934	0.162765	0.597699
beag	8.38	9.13	8.27	6.7	15.01	9.91	9.49	6.8	13.65	10.88	11.32	7.37	10.35	16.15	20.37	17.59	17.42	16.09	13.12	7.37	7.24	7.25	6.85	10.25	13.82	18.4	21.7	21.23	17.74	9.92	10.81	16.14	12.15	11.83		beag	9.56667	9.91833	16.3283	8.68	15.374		beag	0.5	0.31899	0.5	0.167952	0.116625	0.149839
beat-Ia	0.04	0.03	0.02	0.04	0.12	0.16	0.05	0.02	0	0.11	0.01	0.02	0.1	0.22	0.13	0.05	0.07	0.12	0	0.01	0.06	0.02	0	0.26	0.09	0.06	0.17	0.36	0.41	0.09	0.05	0.1	0.48	0.01		beat-Ia	0.0683333	0.035	0.115	0.0583333	0.182		beat-Ia	0.5	0.316229	0.5	0.985586	0.681739	0.148263
beat-Ib	0.3	0.11	0.08	0.21	0.93	0.19	0.07	0.16	1.64	0.17	0.16	0.1	2.08	2.84	2.56	2.32	2.82	2	0.16	0.32	0.14	0.22	0.07	1.44	2.37	2.55	2.99	3.69	2.55	2.87	1.1	2.4	2.45	1.94		beat-Ib	0.303333	0.383333	2.43667	0.391667	2.491		beat-Ib	0	NA	0	2.2208	0.576077	NA
beat-Ic	0.41	0.22	0.17	0.36	1.72	0.34	0.08	0.07	3.43	0.22	0.11	0.03	0.21	1.7	0.4	0.65	2.26	1.59	0.18	0.81	0.13	0.27	0.01	0.33	0.43	0.12	0.46	2.17	0.82	0.5	0.3	0.9	0.86	0.48		beat-Ic	0.536667	0.656667	1.135	0.288333	0.704		beat-Ic	0.1	0.80203	0.1	0.450287	0.844277	0.593798
beat-IIa	0.21	0.06	0.14	0.18	0.19	0.31	0.11	0.08	0.11	0.15	0.08	0.05	0.11	0.47	0.33	0.18	0.45	0.32	0.11	0.04	0.11	0.18	0.07	0.38	0.21	0.13	0.53	0.84	0.69	0.12	0.11	0.17	1.19	0.05		beat-IIa	0.181667	0.0966667	0.31	0.148333	0.404		beat-IIa	1.86	0.0138995	1.86	1.02125	0.348767	0.00340946
beat-IIb	0.27	0.02	0.09	0.2	0.07	0.12	0.04	0	0.02	0.08	0.14	0.04	0.19	0.44	0.35	0.33	0.38	0.16	0.05	0.02	0.16	0.08	0.03	0.28	0.16	0.16	0.59	1.16	1.01	0.14	0.16	0.1	0.73	0.09		beat-IIb	0.128333	0.0533333	0.308333	0.103333	0.43		beat-IIb	2.48	0.00334028	2.48	1.92129	0.563488	0.000650489
beat-IIIa	0.12	0.06	0.09	0.07	0.14	0.12	0.06	0.06	0.09	0.08	0.13	0.04	0.14	0.26	0.15	0.12	0.26	0.15	0.07	0.06	0.06	0.07	0.03	0.13	0.18	0.04	0.28	0.31	0.34	0.12	0.08	0.12	0.18	0.1		beat-IIIa	0.1	0.0766667	0.18	0.07	0.175		beat-IIIa	1.3	0.0504424	1.3	0.700005	0.289073	0.0154545
beat-IIIb	0.07	0.05	0.11	0.21	0.4	0.3	0.13	0.11	0.57	0.13	0.04	0.01	0	0.67	0.12	0.26	0.55	0.48	0.06	0.15	0.12	0.18	0.06	0.17	0.1	0.02	0.2	0.43	0.35	0.06	0.1	0.15	0.17	0.15		beat-IIIb	0.19	0.165	0.346667	0.123333	0.173		beat-IIIb	0.14	0.729464	0.14	0.538573	0.796689	0.499031
beat-IIIc	0.18	0.06	0.1	0.19	0.42	0.24	0.1	0.14	0.16	0.26	0.12	0.05	0.15	0.49	0.27	0.27	0.32	0.23	0.07	0.08	0.22	0.12	0.15	0.37	0.22	0.11	0.49	0.92	0.72	0.1	0.1	0.08	0.55	0.05		beat-IIIc	0.198333	0.138333	0.288333	0.168333	0.334		beat-IIIc	0.47	0.340501	0.47	0.483282	0.346519	0.163113
beat-IV	0.45	0.06	0.17	0.36	0.14	0.26	0.02	0.01	0.18	0.1	0.27	0.05	0.23	0.85	0.22	0.34	0.62	0.26	0.08	0.14	0.17	0.17	0.12	0.46	0.4	0.06	0.74	1.4	1.62	0.34	0.12	0.06	0.97	0.02		beat-IV	0.24	0.105	0.42	0.19	0.573		beat-IV	1.29	0.0507987	1.29	1.46946	0.607679	0.0155999
beat-Va	0.08	0.03	0.08	0.15	0.49	0.41	0.18	0.12	0	0.26	0.07	0	0.06	0.06	0.51	0.19	0.13	0.04	0.02	0.07	0.17	0.14	0.36	0.48	0.13	0.11	0	1	0.15	0.11	0.09	0.13	0.41	0.04		beat-Va	0.206667	0.105	0.165	0.206667	0.217		beat-Va	0	0.992764	0	-0.020245	0.87618	0.981566
beat-Vb	1.52	4.38	1.62	1.08	2.04	1.73	1.23	3.73	2.21	3.61	1.93	1.07	4.59	3.55	4.91	4.93	2.67	1.5	1.77	4.51	1.79	1.14	0.89	2.36	3.25	2.31	3.88	4.33	6.09	1.99	2.5	3.67	3.21	2.83		beat-Vb	2.06167	2.29667	3.69167	2.07667	3.406		beat-Vb	0.03	0.933653	0.03	0.0896757	0.410576	0.827106
beat-Vc	0.32	0.05	0.1	0.24	0.06	0.24	0.05	0.03	0.06	0.07	0.14	0.07	0.29	0.65	0.32	0.18	0.59	0.28	0.07	0.08	0.08	0.11	0	0.28	0.3	0.17	0.59	0.7	1.15	0.32	0.08	0.1	1.44	0.08		beat-Vc	0.168333	0.07	0.385	0.103333	0.493		beat-Vc	4.72	1.89018e-05	4.72	1.89284	0.396463	1.80322e-06
beat-VI	0.12	0.02	0.1	0.13	0.18	0.29	0.1	0.02	0.01	0.16	0.15	0	0.09	0.18	0.09	0.11	0.18	0.2	0.03	0.01	0.15	0.12	0.06	0.29	0.16	0.04	0.29	0.31	0.35	0.13	0.07	0.08	0.45	0.04		beat-VI	0.14	0.0733333	0.141667	0.11	0.192		beat-VI	0.11	0.77854	0.11	0.376668	0.646796	0.560324
beat-VII	0.26	0.02	0.11	0.27	0.13	0.29	0.1	0.02	0.07	0.19	0.63	0.06	0.19	0.27	0.19	0.17	0.39	0.13	0.02	0.03	0.15	0.17	0.07	0.25	0.16	0.06	0.37	0.56	0.56	0.11	0.08	0.09	0.65	0.02		beat-VII	0.18	0.178333	0.223333	0.115	0.266		beat-VII	0.03	0.935906	-0.03	-0.125334	0.592123	0.832365
beg	13.11	11.55	15.87	13.07	7.72	13.32	10.47	13.82	13.73	10.38	10.76	8.82	11.35	18.56	16.71	18.68	14.28	13.96	13.82	7.91	9.48	11.31	8.69	9.56	17.09	13.91	13.21	9.37	11.21	9.03	11.18	15.42	8.38	9.65		beg	12.44	11.33	15.59	10.1283	11.845		beg	0.15	0.703067	-0.15	-0.130257	0.179589	0.468266
bel	93.23	96.35	94.22	84.45	105.55	103.84	90.64	62.88	112.19	92.71	108.87	75.65	148.49	129.75	152.89	157.53	123.19	115.35	99.83	72.78	66.31	76.34	69.99	100.35	144.05	104.1	138.55	135.6	131.09	97.81	88.34	140.66	114.55	108		bel	96.2733	90.49	137.867	80.9333	120.275		bel	0.09	0.808827	0.09	0.066994	0.129108	0.603831
Bem46	8.33	10.27	6.32	6.09	9.89	9.21	8	6.98	17.08	7.74	11.39	7.13	12.23	15.84	16.36	19.29	14.3	16.85	9.85	10.39	7.64	8.25	7.53	9.32	12.26	15.74	15.99	14.22	14.58	8.32	7.27	13.31	7.85	12.06		Bem46	8.35167	9.72	15.8117	8.83	12.16		Bem46	0.32	0.480959	0.32	0.169547	0.15038	0.259548
ben	71.52	105.36	80.89	67.18	132.28	103.51	62.71	64.71	99.19	103.37	84.39	96.02	84.71	169.83	220.36	164.25	164.45	155.25	98.48	85.03	92.1	65.25	72.26	117	103.34	137.72	171.17	131.1	170.58	75.98	89.08	149.26	66.09	93.83		ben	93.4567	85.065	159.808	88.3533	118.815		ben	0.65	0.224694	0.65	0.310536	0.186627	0.0961253
Best1	2.39	2.83	2.08	1.89	2.21	1.48	1.94	1.4	2.71	2.15	2.78	1.84	3.3	3.35	5.32	4.34	5.72	4.83	2.78	3.21	1.55	1.17	1.37	3.35	4.24	3.85	5.48	5.17	6.84	3.28	3.14	5.32	3.34	3.47		Best1	2.14667	2.13667	4.47667	2.23833	4.413		Best1	2.57	0.00268276	2.57	0.515267	0.14817	0.000506037
Best2	2.82	1.17	1.21	2.52	2.93	1.98	1.83	1.26	0.43	1.92	2.52	2.16	0.76	0.44	0.14	0.19	0.35	0.85	1.16	1.51	1.98	1.87	1.65	1.32	0.26	0.08	0.69	0.8	0.62	1.89	2.05	0.22	0.3	0.88		Best2	2.105	1.68667	0.455	1.58167	0.779		Best2	4.2	6.31082e-05	-4.2	-2.36874	0.526905	6.93817e-06
Best3	1.21	0.73	0.25	0.47	6.28	0.7	0.06	0	12.54	0.14	0.52	0	0	2.46	0.41	1.27	7.41	4.38	1	3.28	0.04	1.06	0	0.24	0.91	0	0.94	6.28	0.8	1.2	0.15	1.8	0.69	0.75		Best3	1.60667	2.21	2.655	0.936667	1.352		Best3	0	0.993985	0	0.0231474	1.15604	0.984025
Best4	0.83	0.35	0.4	0.51	2.81	0.59	0	0	5.44	0.54	0.26	0	0	2.95	0.08	1.71	3.58	3.11	1.01	1.66	0.04	0.57	0	0.32	0.41	0	0.65	2.6	0.64	0.53	0.87	1.49	0	1.59		Best4	0.915	1.04	1.905	0.6	0.878		Best4	0.06	0.864733	0.06	0.456919	1.16205	0.694172
Bet1	47.73	59.05	52.98	47.58	43.74	58.63	38.62	43.53	57.78	49.36	57.54	41.07	75.98	72.86	68.03	64.8	85.97	76.77	57.98	60.01	37.47	51.65	50.77	45.61	91.35	85.75	84.19	68.6	66.95	63.76	47.73	90.2	70.45	62.58		Bet1	51.6183	47.9833	74.0683	50.5817	73.156		Bet1	0.1	0.792157	0.1	0.0716116	0.128994	0.578788
Bet3	3.89	5.26	5.16	3.53	6.59	4.5	4.48	3.62	9.64	4.84	4.63	4.19	6.23	9.19	10.83	10.32	7.75	8.44	5.65	5.48	4.04	3.83	4.55	6.15	7.8	7.91	7.65	8.83	10.08	5.85	4.59	8.1	5.43	8.43		Bet3	4.82167	5.23333	8.79333	4.95	7.467		Bet3	0.37	0.424147	0.37	0.208248	0.16976	0.219927
Bet5	16.6	22.97	22.13	14.97	15.44	23.71	18.69	15.83	27.39	24.34	24.09	20.28	30.41	37.8	38.75	34.72	27.14	33.51	20.81	21.7	19.02	16.65	13.36	24.53	26.74	41.62	36.74	33.36	28.17	17.6	16.32	27.4	21.43	18.56		Bet5	19.3033	21.77	33.7217	19.345	26.794		Bet5	0.12	0.754889	0.12	0.0725172	0.115433	0.529859
beta'COP	35.02	40.91	45.47	33.14	45.39	35.08	47.26	37.14	52.85	35.14	40.44	25.57	53.59	60.16	74.51	60.05	54.13	49.3	54.56	29.57	28.09	42.05	33.34	47.72	74.5	66.19	62.5	56.09	53.15	52.45	46.48	68.24	57.99	61.29		beta'COP	39.1683	39.7333	58.6233	39.2217	59.888		beta'COP	0	0.995292	0	-0.00257623	0.159577	0.987119
beta-Man	7.71	8.4	6.58	5.26	6.82	8.42	7.04	6.23	8.21	6.71	10.78	6.56	9.31	12.86	13.1	15.2	11.83	11.06	8.99	6.79	5.67	6.12	5.44	8.19	12.41	15.1	14.79	14.25	13.21	6.57	6.1	11.84	11.32	9.99		beta-Man	7.19833	7.58833	12.2267	6.86667	11.558		beta-Man	0.27	0.541272	0.27	0.11918	0.116674	0.307029
beta-PheRS	17.43	25.04	26.02	21.59	21.56	21.92	20.4	19.72	19.97	16.68	20.28	16.23	28.69	27.34	28.61	29.1	21.49	22.75	25.21	15.9	16.16	19.96	13.45	21.21	37.76	38.16	28.66	25.68	21.71	20.78	19.67	28.22	27.29	23.04		beta-PheRS	22.26	18.88	26.33	18.6483	27.097		beta-PheRS	0.11	0.778922	-0.11	-0.100097	0.172071	0.560758
beta-Spec	10.47	11.85	11.22	13.24	14.01	14.4	12.83	10.19	8.7	9.52	10.78	9.03	12.56	10.48	14.66	12.53	12.35	10.74	13.53	8.06	8.83	14.36	11.75	15.98	12.78	8.65	11.02	12.5	15.83	13.58	14.49	15.6	9.37	14.12		beta-Spec	12.5317	10.175	12.22	12.085	12.794		beta-Spec	0.67	0.211508	-0.67	-0.330574	0.194352	0.0889606
beta3GalTII	6.6	10.23	7.66	5.6	9.95	10.29	5.51	5.91	9.56	8.69	8.92	8.44	15.34	15.27	17.63	13.98	15.37	15.46	7.46	7.93	5.96	7.25	6.67	11.45	15.24	20.35	14.32	17.18	16.84	7.3	7	19.54	17.66	11.08		beta3GalTII	8.38833	7.83833	15.5083	7.78667	14.651		beta3GalTII	1.77	0.0170652	1.77	0.425028	0.149047	0.0043495
beta4GalNAcTA	7.21	4.31	7.96	4.46	3.46	8.69	6.17	6.48	9.7	3.34	5.13	4.74	5.85	8.31	5.93	9.51	6.3	7.49	5.48	5.35	5.52	6.39	5.77	4.73	5.3	11.02	9.32	11.34	10.39	4.96	4.86	7.83	12.83	10.41		beta4GalNAcTA	6.015	5.92667	7.23167	5.54	8.826		beta4GalNAcTA	0.35	0.45179	-0.35	-0.281801	0.238989	0.238343
beta4GalNAcTB	9.24	14.17	10.57	9.59	15.24	12.88	8.48	7.46	11.23	9.22	15.96	8.55	17.42	16.93	20.69	20.17	14.6	20.91	14.66	14.55	10.19	7.83	9.65	13.49	16	20.68	19.3	19.81	14.49	11.18	11.11	19.9	12.21	15.71		beta4GalNAcTB	11.9483	10.15	18.4533	11.7283	16.039		beta4GalNAcTB	0.82	0.149699	0.82	0.313255	0.165058	0.0577151
beta4GalT7	24.01	22.47	27.14	18.58	28.24	27.59	22.46	11.5	22.76	18.9	33.51	20.42	26.54	29.82	37.94	35.03	29.75	34.21	26.07	15.26	16.8	18.87	14.52	21.59	30.01	34.45	26.19	30.92	21.33	18.37	16.86	31.81	18.48	25.2		beta4GalT7	24.6717	21.5917	32.215	18.8517	25.362		beta4GalT7	0.02	0.952261	0.02	0.0272506	0.173936	0.875505
betaCOP	24.5	21.86	26.49	22.48	18.2	28.4	20.72	20.75	28.96	21.17	24.8	17.45	32.36	27.25	28.36	29.28	23.54	23.5	31.39	19.29	20.36	22.31	18.76	20.01	32.82	29.82	26.62	24.26	29.89	24.85	22.13	33.01	36.57	25.18		betaCOP	23.655	22.3083	27.3817	22.02	28.515		betaCOP	0.66	0.219984	-0.66	-0.250771	0.149604	0.0936918
betaggt-I	9.1	8.43	7.64	7.37	8.29	9.71	7.12	5.18	8.98	9.3	9.16	6.23	19.11	18.24	21.62	21.92	22.85	25.56	7.01	8.49	8.16	8.94	6.82	15.94	22.24	27.03	31.39	28.48	30.68	11.63	8.24	24.76	17.82	20.67		betaggt-I	8.42333	7.66167	21.55	9.22667	22.294		betaggt-I	11.53	2.93293e-12	11.53	0.937973	0.12495	6.05838e-14
betaggt-II	28.69	19.95	21.89	24.26	24.64	30.71	22.81	31.45	33.14	19.76	24.49	12.3	29.2	27.6	31.89	39.28	32.49	21.63	23.39	41.64	26.4	23.16	25.03	15.75	37.73	47.5	40.45	45.46	35.5	28.79	17.89	35.14	29.62	37.29		betaggt-II	25.0233	23.9917	30.3483	25.895	35.537		betaggt-II	0.24	0.576867	-0.24	-0.231057	0.241736	0.339161
betaGlu	2.13	2.64	1.79	1.03	2.81	1.03	1.92	2.18	4.91	2.17	1.59	1.63	3.27	6.53	4.47	8.29	3.88	3.17	3.47	2.26	1.95	2.68	1.72	1.47	3.24	8.03	7.2	5.19	5.84	2.56	2.18	3.94	2.6	4.11		betaGlu	1.905	2.4	4.935	2.25833	4.489		betaGlu	0.57	0.270996	0.57	0.477067	0.308042	0.121452
betaNACtes1	8.57	1.46	10.47	3.52	6.58	2.18	2.9	0.7	13.61	0.7	1.66	0.17	1.89	2.74	0.67	2.01	14.71	3.86	3.79	6.88	0.13	3.22	0.43	0	2.47	0	0.21	5.17	3.03	5.28	8.62	6.51	3.13	3.54		betaNACtes1	5.46333	3.29	4.31333	2.40833	3.796		betaNACtes1	0	0.991267	0	0.0226525	0.792259	0.97719
betaNACtes2	4.59	1.07	4.43	0.91	5.19	1.45	1.69	0	15.18	0.42	1.31	0	0.25	3.41	0	1.41	7.78	1.58	0.91	5.9	0.45	2.06	0	0	1.69	0	0	8.9	0.48	5.32	2.38	4.73	0	2.55		betaNACtes2	2.94	3.1	2.405	1.55333	2.605		betaNACtes2	0.08	0.825098	-0.08	-0.528321	1.09332	0.628936
betaNACtes3	1.31	0.39	1.16	0.71	2.59	0.08	0.69	0	5.87	0.2	0.34	0.13	0.35	0.53	0	0.25	3.45	1.99	0.12	2.61	0	0.62	0	0.09	0.07	0	0	3.84	0.45	1.91	0.35	1.35	0	1.12		betaNACtes3	1.04	1.205	1.095	0.573333	0.909		betaNACtes3	0.05	0.893696	-0.05	-0.323712	0.998201	0.745715
betaNACtes4	2.36	0.8	1.63	1.43	4.55	0.65	0.71	0.46	7.27	1	1.34	0	0.45	1.46	0.22	0.72	5.53	2.46	0.53	2.29	0	1.46	0	0	1.46	0	0.68	7.19	0.11	3.74	1.01	2.5	0	1.31		betaNACtes4	1.90333	1.79667	1.80667	0.713333	1.8		betaNACtes4	0.05	0.884728	-0.05	-0.290613	0.839874	0.729328
betaNACtes5	2.69	0	2.07	1.43	2.17	1.27	1.24	0	1.85	0.22	0	0	0	2.43	0	0.56	1.53	1.38	0	1.67	0	0.23	0	0	0	0	0.53	0.73	0	1.48	1.64	0.97	0	0.29		betaNACtes5	1.605	0.551667	0.983333	0.316667	0.564		betaNACtes5	0.04	0.903324	0.04	0.330675	1.11745	0.767292
betaNACtes6	3.52	1.46	2.47	1.43	6.62	2.28	0.95	0.12	5.09	1.18	2.47	0	0.7	2.29	0	2.16	6.05	2.81	0.61	5.89	0	3.32	0	0	0	0	0	6.28	0	7.06	1.12	5.03	0	1.37		betaNACtes6	2.96333	1.635	2.335	1.63667	2.086		betaNACtes6	0.02	0.958382	0.02	0.125279	0.893155	0.88845
betaTry	0.1	0.11	0	0	0	0.14	0.1	0	0.21	0.5	0.11	0	0	0	0	0	0	0	0	0.32	0.14	0.13	0.34	0	0.14	0	0	0	0	0	0	0	0	0.16		betaTry	0.0583333	0.153333	0	0.155	0.03		betaTry	0	NA	0	-1.8201	1.32289	0.168867
betaTub56D	414.49	543.06	494.08	449.71	446.52	474.23	399.09	411.13	374.94	508.12	456.5	474.99	709.56	591.17	764.27	743.03	565.97	643.02	490.92	382.33	392.01	387.34	408.93	590.21	721.14	705.91	724.28	641.14	736.92	509.88	444.06	765.17	554.69	631.02		betaTub56D	470.348	437.462	669.503	441.957	643.421		betaTub56D	0.02	0.961886	0.02	0.0227469	0.185988	0.902659
betaTub60D	2.09	2.71	2.1	2.95	7.65	1.48	2.44	3.57	5.28	4.78	2.92	5.53	177.36	526.65	670.45	576.79	485.57	520.26	2.89	5.52	5.55	2.56	6.24	316.09	258.24	879.94	960.07	841.51	786.27	139.58	260.62	683.19	228.17	483.63		betaTub60D	3.16333	4.08667	492.847	56.475	552.122		betaTub60D	95.56	2.74048e-96	95.56	6.2156	0.293291	1.11727e-99
betaTub85D	3.56	2.53	2.74	2.07	52.24	4.16	0.11	2.13	81.53	3.73	1.45	0	6.15	56.99	4.04	19.81	49.24	37.16	4.21	19.23	2.36	6.02	0.39	2.26	12.06	1.27	2.96	44.54	3.99	11.94	7.39	19.87	2.56	14.01		betaTub85D	11.2167	14.825	28.8983	5.745	12.059		betaTub85D	0.11	0.784697	0.11	0.586419	1.02731	0.568115
betaTub97EF	11.62	8.15	8.26	11.07	5	8.13	9.91	5.61	4.95	4.05	13.03	3.57	11.07	14.45	19.09	16.62	15.93	15.2	4.97	5.82	3.61	11.37	8.25	13	14.69	22.69	26	21.44	20.75	10.97	11.96	22.46	13.26	14.53		betaTub97EF	8.705	6.85333	15.3933	7.83667	17.875		betaTub97EF	0.86	0.137757	0.86	0.586884	0.301871	0.0518767
bft	1.64	0	0	0	0	0	0	0	0	0	0	0	0	0	0	0	0	0	0	0	0	0	0	0	0	0	0	0	0	0	0	0	0	0		bft	0.273333	0	0	0	0		bft	0	NA	0	NA	NA	NA
BG642163	0	0	0	0	0	0	0	0	0	0	0	0	0	0	0	0	0	0	0	0	0	0	0.62	0	0	0	1.02	0.45	0	0.19	0	0	0	0		BG642163	0	0	0	0.103333	0.166		BG642163	0	NA	0	NA	NA	NA
BG642167	0	0	0	0	0	0	0	0	0	0	0	0	0	0.3	0.59	0	0	0	0.48	0	0	0	0	0.35	0	0	0	1.72	0.89	0	0	0	0	0		BG642167	0	0	0.148333	0.138333	0.261		BG642167	0	NA	0	0.58999	1.34851	0.66174
BG642312	1.57	2.38	0.35	1.28	1.93	2.55	1.54	4.7	2.48	4.39	1.38	1.43	0	1.54	0.34	0	0.79	2.41	1.37	1.86	1.74	2.63	3.08	1.18	3.24	0.19	0	0.2	0	1.48	1.25	0.43	0	2.69		BG642312	1.67667	2.65333	0.846667	1.97667	0.948		BG642312	1.82	0.0152653	-1.82	-2.10928	0.729039	0.00381295
Bgb	3.47	4.14	7.37	3.87	15.37	8.86	7.75	6.52	8.47	7.75	6.18	4.83	12.1	13.32	20.13	12.7	12.61	20.4	9.25	3.75	5.01	5.34	5.22	10.67	12.98	19.64	13.45	15.78	16.82	9.32	6.34	26.73	33.91	13.4		Bgb	7.18	6.91667	15.21	6.54	16.837		Bgb	1.61	0.0243914	1.61	0.558398	0.20554	0.00659299
bgcn	2.9	4.37	3.24	2.56	4.29	3.63	2.26	1.92	4.22	3.11	4.07	2.22	3.17	5.63	4.34	5.77	5.56	4.92	3.35	3.43	2.48	1.71	1.86	2.93	5.02	4.99	4.38	6.34	4.35	2.99	2.55	6.05	3.41	3.13		bgcn	3.49833	2.96667	4.89833	2.62667	4.321		bgcn	0.39	0.411357	0.39	0.184864	0.147614	0.210444
bgm	40.62	33.54	14.9	39.89	5.84	11.85	29.76	26.92	17.87	6.81	25.74	6.77	8.26	4.06	2.61	2.4	5.6	2.43	3.99	39.89	11.86	38.17	35.15	8.89	6.8	3.59	3.33	1.44	4.72	31.17	24.21	4.28	2.51	35.82		bgm	24.44	18.9783	4.22667	22.9917	11.787		bgm	5.74	1.80296e-06	-5.74	-2.6042	0.492852	1.26429e-07
BHD	689.21	679.05	742.44	563.72	601.88	789.36	477.14	438.28	578.72	629.21	694.69	523.85	726.61	729.96	889.79	837.72	896.6	825.42	609.63	580.95	526.28	485.64	407.56	678.96	779.83	798.26	752.56	676.71	777.53	530.02	502.74	894.31	577.35	603.09		BHD	677.61	556.982	817.683	548.17	689.24		BHD	0.02	0.960963	-0.02	-0.0132525	0.104975	0.899538
bi	0.35	0.13	0.28	0.66	1.09	1.04	0.26	0.41	0.4	0.77	0.32	0.21	0.25	0.56	0.34	0.45	0.53	0.78	0.21	0.1	0.54	0.63	0.46	1.13	0.36	0.2	0.66	0.94	0.96	0.32	0.19	0.33	1.11	0.17		bi	0.591667	0.395	0.485	0.511667	0.524		bi	0.2	0.636362	-0.2	-0.28619	0.339338	0.399018
BI-1	50.37	69.7	62.88	47.75	60.63	47.51	51.37	51.67	90.36	57.95	56.66	43.58	64.79	93.95	85.62	89.82	73.34	84.31	65.15	62.34	50.22	45.79	45.78	53.99	78.17	93.7	88.07	85.16	84.18	54.77	50.6	98.43	57.15	75.83		BI-1	56.4733	58.5983	81.9717	53.8783	76.606		BI-1	0.12	0.755157	-0.12	-0.0692041	0.110258	0.530231
bib	0.18	0.09	0.33	0.33	0.49	0.26	0.17	0.29	0.22	0.51	0.17	0.11	0.24	2.86	2.79	1.88	1.16	1.98	0.18	0.24	0.48	0.36	0.09	0.39	0.28	0.88	1.19	1.1	1.31	0.23	0.09	0.11	1.07	0.03		bib	0.28	0.245	1.81833	0.29	0.629		bib	3.97	0.000107603	3.97	2.15182	0.493202	1.28316e-05
bic	944.96	868.19	952.6	827.78	845.46	1034.66	839.26	476.57	661.96	669.13	871.51	667.38	886.36	883.24	1124.64	970.44	895.91	1070.28	808.39	546.46	541.01	712.3	543	659.08	961.29	1031.27	905.65	772.72	818.83	610.48	624.56	904.4	714	680.36		bic	912.275	697.635	971.812	635.04	802.356		bic	0.12	0.761778	-0.12	-0.093892	0.152647	0.538494
BicC	0.27	0.09	0.04	0.09	0.61	0.03	0.06	0	1.97	0.13	0.08	0.01	0.16	1.19	0.29	0.29	0.84	0.68	0.21	0.34	0.03	0.02	0	0.15	0.33	0.05	0.45	0.94	0.32	0.27	0	0.53	0.29	0.17		BicC	0.188333	0.375	0.575	0.125	0.335		BicC	0.05	0.892913	0.05	0.295381	0.901504	0.743174
BicD	5.49	5.94	4.37	7.02	5.51	5.31	4.74	4.29	4.88	5.2	5.32	4.75	5.57	5.33	6.62	6.48	6.59	5.62	4.68	6	4.57	5.13	6.11	5.41	4.86	5.17	6.64	7.58	6.45	6.34	4.71	6.54	5.24	6.24		BicD	5.60667	4.86333	6.035	5.31667	5.977		BicD	1.07	0.085371	-1.07	-0.270475	0.123881	0.02901
bif	7.67	9.33	11.67	5.54	7.45	12.97	8.31	6.99	9.26	8.46	14.02	5.3	31.36	22.96	29.33	29.72	31.04	33.9	11.23	9.79	6.58	7.15	4.86	22.66	35.58	34.37	41.85	34.86	35.41	18.21	16.62	45.34	34.41	31.69		bif	9.105	8.72333	29.7183	10.3783	32.834		bif	8.95	1.12394e-09	8.95	1.23196	0.186093	3.58939e-11
BigH1	4.78	1.08	0.92	1.7	8.77	2.03	1.97	0	22.32	0.97	1.84	0.1	1.91	10.68	0.67	6.17	17.59	7.14	1.91	6.12	0	1.85	0	0.52	3.23	0	1.05	12.33	1	5.91	1.98	8.92	1.42	3.44		BigH1	3.21333	4.53333	7.36	1.73333	3.928		BigH1	0.06	0.871838	0.06	0.35574	0.947455	0.707312
bigmax	29.39	31.67	24.87	25.66	27.06	33.3	23.27	22.87	27.95	24.07	34.03	28.56	40.69	40.59	54.57	44.61	36.64	48.37	23.78	26.2	20.06	18.18	19.03	27.91	41.39	52.76	52.66	39.51	42.11	27.76	32.62	55.24	31.39	40.66		bigmax	28.6583	26.7917	44.245	22.5267	41.61		bigmax	0.26	0.553103	0.26	0.148943	0.148815	0.316896
Bili	0.15	0.3	0.06	0.73	0.65	0.52	0.06	0.11	0.75	0.07	0.11	0.17	0	0.72	0.51	0.06	0.66	0.44	0.07	0.29	0.16	0.37	0.23	0.36	0.05	0.22	1.13	0.36	0.89	0.14	0.5	0.66	0.24	0.65		Bili	0.401667	0.211667	0.398333	0.246667	0.484		Bili	0.1	0.796643	0.1	0.410175	0.753149	0.58602
bin	0.64	0.39	0.37	0.34	0.69	0.36	0.62	0.38	0.41	0.1	0.45	0.38	0	0.73	0.48	0.04	0.86	0.53	0.1	0.53	0.08	0.07	0.19	0.19	0.46	0.13	1.76	0.93	0.6	1.1	0.26	0.1	0.34	0.18		bin	0.465	0.39	0.44	0.193333	0.586		bin	0.12	0.753453	-0.12	-0.417081	0.660834	0.527946
Bin1	10.25	11.14	10.09	8.31	11.76	10.68	9.18	4.17	10.05	10.88	14.18	11.01	9.66	12.59	13.81	13.55	10.01	11.77	10.12	7.31	6.6	6.29	6.07	9.29	11.65	14.01	12.68	10.53	10.98	9.15	8.42	14.23	7.6	9.71		Bin1	10.3717	9.91167	11.8983	7.61333	10.896		Bin1	0.45	0.351674	-0.45	-0.289457	0.210999	0.170114
bin3	5.7	7.65	7.83	6.21	9.64	8.84	5.8	3.52	7.49	6.44	8.33	5.91	9.82	7.7	9.98	9.32	9.25	8.26	7.79	4.79	5.75	5.5	4.33	7.58	9.04	5.48	10.24	9.63	9.85	6.76	5.42	10.92	5.84	6.92		bin3	7.645	6.24833	9.055	5.95667	8.01		bin3	0	0.994132	0	0.00302489	0.154746	0.984404
bip1	0.3	0.3	0.65	0.47	1.68	0.69	0.64	0.45	1.12	0.79	0.21	0.89	1.14	2.14	0.7	0.66	1.31	1.95	0.26	0.25	0.66	0.71	0.78	0.82	0.37	0.71	0.66	0.57	0.84	0.69	0.96	0.36	0	0.4		bip1	0.681667	0.683333	1.31667	0.58	0.556		bip1	0.2	0.634493	0.2	0.369591	0.436302	0.396941
bip2	25.73	31.3	29.64	25.39	47.93	37.24	22.78	19.35	35.61	33.26	39.28	26.62	32.94	58.4	73.71	61.22	58.31	53.42	37.33	25.22	26.25	22.8	19.97	37.6	34.82	41.89	54.03	50.19	59.91	24.32	24.88	52.03	25.6	31.04		bip2	32.8717	29.4833	56.3333	28.195	39.871		bip2	1.45	0.0354174	1.45	0.368866	0.143615	0.0102159
Bka	30.49	35.1	36.08	26	27.64	33.53	30.39	11.85	22.53	23.21	32.9	17.87	29.46	27.09	34.5	36.06	26.18	32.21	24.44	17.34	18.39	23.29	15.11	23.2	37.42	47.26	38.11	25.48	26.38	19.29	13.65	29.47	18.62	16.7		Bka	31.4733	23.125	30.9167	20.295	27.238		Bka	0.12	0.752707	-0.12	-0.133561	0.210843	0.526432
blanks	60.96	18.48	36.49	35.51	167.48	34.53	23.64	4.7	209.37	10.24	32.06	1.18	28.74	57.26	6.84	34	163.44	74.93	14.88	79.35	3.63	29.09	0	6.48	38.61	1.08	7.05	129.39	11.19	81.62	42.28	99.64	23.01	50.13		blanks	58.9083	46.865	60.8683	22.2383	48.4		blanks	0.01	0.970191	0.01	0.0739754	0.816255	0.927788
Blimp-1	0.34	0.1	1.78	0.32	0.28	0.22	0.11	0.17	0.31	0.2	0.2	0.32	0.2	0.52	0.52	0.29	0.7	0.39	0.18	0.26	0.21	0.09	0.26	0.39	0.43	0.24	0.65	1.24	1.14	0.43	0.18	0.25	0.68	0.22		Blimp-1	0.506667	0.218333	0.436667	0.231667	0.546		Blimp-1	0.41	0.392535	0.41	0.420073	0.326281	0.197935
Blm	2.42	3.73	3.05	2.68	4.63	3.83	2.92	1.37	6.49	2.71	3.49	2.35	2.06	5.4	4.35	4.41	3.83	3.68	2.94	3.08	1.73	2.26	1.61	3.22	3.78	3.14	5.18	7.49	3.14	2.81	2.43	5.36	4.36	2.64		Blm	3.39	3.22167	3.955	2.47333	4.033		Blm	0.2	0.630556	-0.2	-0.215441	0.252387	0.393321
Blos1	17.29	18.02	13.78	13.61	20.83	16.38	20.35	13.55	31.55	14.86	19.06	13.62	21.48	31.51	24.38	24.63	23.14	26.62	19.69	20.13	18.94	18.58	10.77	15.87	29.15	27.43	24.88	29.89	19.1	17.94	13.77	25.48	15.91	22.82		Blos1	16.6517	18.8317	25.2933	17.33	22.637		Blos1	0.14	0.716893	-0.14	-0.117053	0.167042	0.483466
Blos2	40.81	55.77	48.08	49.12	60.33	47.69	37.29	26.43	53.55	47.26	45.37	44.42	44.01	48.14	67.9	51.39	48.58	54.99	59.27	48.39	39.02	32.82	24.77	33.44	59.72	66.47	68.26	49.99	40.39	37.27	36.85	61.13	33.66	48.07		Blos2	50.3	42.3867	52.5017	39.6183	50.181		Blos2	0.76	0.174474	-0.76	-0.250656	0.13821	0.0697411
Blos3	15.07	17.73	18.61	11.67	16.34	21.5	13.63	8.64	21.05	20.83	24.04	19.75	19.47	26.97	31.63	26.54	21.75	23.68	25.49	17.09	18.45	13.51	11.08	18.46	18.76	25.62	23.84	23.26	11.75	12.71	12.64	23.9	19.71	18.06		Blos3	16.82	17.99	25.0067	17.3467	19.025		Blos3	0.06	0.866656	-0.06	-0.0743283	0.191176	0.697427
Blos4	4.65	6.53	3.14	3.56	7.45	3.37	3.23	4	4.61	4.96	3.84	2.6	9.29	8.48	6.81	10.75	8.46	6.27	5.88	6.99	4.06	2.68	4.21	3.41	12.46	7.16	6.99	10.49	8.73	4.9	4.41	5.37	0	2.86		Blos4	4.78333	3.87333	8.34333	4.53833	6.337		Blos4	1.26	0.0551395	1.26	0.538287	0.22599	0.0172234
blot	1.52	0.68	1.39	1.63	5.71	2.01	1.25	1.36	0.85	3.09	2.59	1.34	0.57	3.21	3.26	3.62	2.6	4.63	0.64	0.88	2.6	1.77	1.48	2.46	0.63	1.22	2.38	1.63	1.87	0.91	1.12	0.6	0.72	0.68		blot	2.15667	1.74667	2.98167	1.63833	1.176		blot	0.05	0.881892	0.05	0.148217	0.418592	0.723275
blow	8.3	9.14	8.93	6.94	9.69	10.14	7.4	5	9.47	9.16	9.79	8.5	9.7	18.37	25	22.57	20.05	19.28	10.2	7.89	7	6.94	5.78	10.96	13.14	23.28	20.94	18.62	20.44	8.13	10.19	18.18	12.16	14.99		blow	8.85667	8.22	19.1617	8.12833	16.007		blow	2.83	0.00149552	2.83	0.636389	0.174229	0.000259591
blp	50.28	51.02	48.18	51.53	42.68	53.11	42.98	33.19	49.61	37.76	44.7	34.12	48.41	36.66	48.65	50.68	50.19	57.9	44.65	40.25	29.75	47.48	29.09	32.73	48.79	36.28	48.03	38.43	40.7	37.77	37.7	52.75	36.43	42.75		blp	49.4667	40.3933	48.7483	37.325	41.963		blp	1.02	0.0964753	-1.02	-0.289203	0.136153	0.0336618
blw	1086.98	1113.75	819.89	1215.11	948.91	1249.53	1005.77	777.07	474.84	862.08	880.69	962.01	465.67	374.35	501.24	423.75	429.82	640.13	722.84	820.29	800.4	995.9	944.67	732.37	604.16	411.33	407.32	375.36	429.07	781.54	763.88	530.55	329.56	669.56		blw	1072.36	827.077	472.493	836.078	530.233		blw	5.73	1.84151e-06	-5.73	-1.41051	0.267165	1.29507e-07
bma	0.46	0.25	0.32	0.31	0.44	0.48	0.27	0.17	0.39	0.35	0.38	0.17	0.28	0.96	1.05	0.77	0.91	0.54	0.29	0.22	0.25	0.19	0.21	0.6	0.57	0.66	1.06	1.29	1.46	0.27	0.18	0.5	1.24	0.23		bma	0.376667	0.288333	0.751667	0.293333	0.746		bma	2.01	0.00977788	2.01	0.818692	0.267957	0.00224831
Bmcp	3.77	3.1	3.16	3.04	3.15	3.39	2.98	2.49	3.76	2.74	3.59	2.45	4.65	4.21	4.38	4.84	3.66	4.77	3.5	3.71	2.15	2.63	2.59	2.92	3.77	5	4.2	6.4	4.25	2.76	2.51	3.63	2.12	3.36		Bmcp	3.26833	3.00167	4.41833	2.91667	3.8		Bmcp	0	0.994798	0	-0.00231044	0.126862	0.98547
bmm	4.85	4.01	2.85	2.41	5.51	4	3.32	5	9.69	4.3	4.26	2.9	4.57	8.02	8.01	8.24	9.41	7.94	3.8	4.96	4.39	3.5	5.43	5.33	4.65	6.72	8.72	11.46	7.29	4.76	5.88	9.53	4.08	6.64		bmm	3.93833	4.91167	7.69833	4.56833	6.973		bmm	0.08	0.832891	0.08	0.105604	0.227192	0.642057
bnb	5.53	5.65	12.61	9.78	11.18	5.15	8.49	5.18	3.84	10.27	14.79	9.25	1.91	0.97	0.25	0.17	0.86	3.66	5.39	8.72	7.56	10.97	9.87	6.47	1.4	0.32	0.37	0.78	1.07	4.56	9.36	1.46	2.12	5.9		bnb	8.31667	8.63667	1.30333	8.16333	2.734		bnb	5.35	4.41997e-06	-5.35	-3.07161	0.60298	3.50486e-07
bnk	0	0	0	0	0	0	0	0	0	0	0	0	0	0.08	0	0	0	0	0	0	0	0	0.06	0	0.07	0	0	0	0	0.07	0	0	0	0		bnk	0	0	0.0133333	0.01	0.014		bnk	0	NA	0	0.17383	1.34851	0.897433
bnl	1.32	1.38	1.52	1.5	1.26	1.74	0.83	1.09	1.13	1.5	1.54	1.27	1.39	0.88	0.6	0.71	1.11	0.63	0.65	1.4	1.23	2.17	1.54	1.4	1.12	0.5	1.33	1.2	1.12	1.14	1.79	1.32	1.23	1.31		bnl	1.45333	1.22667	0.886667	1.39833	1.206		bnl	2.39	0.00409979	-2.39	-0.993122	0.2969	0.000822911
BobA	0	0	0	0.93	0	0.99	0	1.17	0	0	0	0	0	0	0	0	0	0	0	0	0.46	0.23	0	0.29	0	0	0	0	0	0	0	0	0	0		BobA	0.32	0.195	0	0.163333	0		BobA	0	NA	0	-1.32429	1.35077	0.326889
boca	68.02	114.51	108.79	85.96	99.36	98.68	88.24	72.23	116.99	109.3	92.18	96.91	111.29	128.47	158.88	146.44	104.23	118.78	130.13	84.53	77.66	71.55	73.93	97.98	140.35	150.99	139.9	113.14	122.46	99.6	96.9	143.77	127.2	118.32		boca	95.8867	95.975	128.015	89.2967	125.263		boca	0.35	0.444356	-0.35	-0.156204	0.130954	0.232942
bocks	14.44	24.59	30.59	21.83	29.46	29.17	28.03	29.84	31.27	17.85	23.09	19.09	31.78	34.56	42.82	41.97	31.37	28.17	35.81	23.51	12.91	31.4	28.91	32.95	53.17	34.53	33.97	38.07	36.79	37.25	33.86	57.36	45.06	40		bocks	25.0133	24.8617	35.1117	27.5817	41.006		bocks	0.08	0.834392	-0.08	-0.0946762	0.205092	0.644348
BOD1	3.1	5.22	5.15	3.53	8.45	7.25	3.4	3.07	8.02	4.98	6.71	3.9	4.71	7.33	7.6	6.24	8.64	8.72	5.25	4.52	4.29	3.97	2.5	6.16	4.91	6.97	9.36	6.19	7.87	4.79	3.08	7.8	8.75	4.56		BOD1	5.45	5.01333	7.20667	4.44833	6.428		BOD1	0	0.996988	0	-0.00166683	0.172935	0.99231
boi	0.55	0.48	0.53	0.74	0.92	0.87	0.41	0.51	0.72	0.83	0.61	0.51	0.76	1.12	0.83	0.81	0.77	0.82	0.49	0.52	0.61	0.45	0.62	0.93	0.76	0.91	1.27	1.31	1.15	0.63	0.45	1.13	1.21	0.83		boi	0.681667	0.598333	0.851667	0.603333	0.965		boi	0.04	0.905138	-0.04	-0.0512673	0.176039	0.770877
boil	0.68	0.39	0	0.14	4.51	0.05	0	0.12	8.02	0.88	0.54	0.08	0.45	4.06	0.34	2.07	4.01	2.97	0.39	1.92	0.09	0.31	0	0.51	0.32	0.11	0.66	4.36	0.14	1.37	0.22	1.24	0	0.55		boil	0.961667	1.60667	2.31667	0.536667	0.897		boil	0.03	0.930981	0.03	0.207893	0.929717	0.823061
bol	9.61	6.77	10.51	13.46	8.9	11.52	10.82	5.74	8.39	6.92	9.83	7	5.18	6.5	4.92	4.49	6.18	6.28	6.99	4.8	5.93	11.25	7.52	8.38	5.21	2.52	3.75	6.36	4.78	6.32	8.04	5.1	4.02	5.22		bol	10.1283	8.11667	5.59167	7.47833	5.132		bol	7.51	3.1156e-08	-7.51	-1.09839	0.181304	1.37605e-09
boly	0.86	0	0.55	0.51	5.03	0.48	0	0.54	6.9	0.29	0.5	0	0	3.9	0	2.31	4.86	3.19	0.66	1.74	0.06	2.23	0	0.16	1.1	0	0	3.6	0.5	1.91	0.44	1.56	0	1.08		boly	1.23833	1.37167	2.37667	0.808333	1.019		boly	0.05	0.889283	0.05	0.377933	1.12274	0.736407
bon	0.87	0.74	0.75	0.87	1.35	1.16	0.9	0.7	1.35	1.02	1	0.86	1.43	1.45	1.35	1.63	1.88	1.29	0.82	0.88	0.95	1.03	0.75	1.41	1.6	1.09	1.94	2.01	1.98	0.91	0.61	1.55	1.34	0.8		bon	0.956667	0.971667	1.505	0.973333	1.383		bon	0.11	0.784697	0.11	0.0750365	0.1314	0.567962
bond	16.48	11.25	16.73	22.1	10.71	11.8	17.65	6.76	8.19	6.39	122.53	15.84	1.29	3.56	0.98	0.99	4.94	6.3	12.33	5.53	6.52	20	11.7	11.65	3.19	0.69	1.3	3.46	2.25	11.62	15.3	2.94	1.48	6.79		bond	14.845	29.56	3.01	11.2883	4.902		bond	5.23	5.90765e-06	-5.23	-3.49292	0.694137	4.85312e-07
bonsai	42.96	40.38	34.18	38.04	28.59	43.78	36.49	26.06	25.88	23.96	34.7	25.12	30.06	29.25	31.75	35.33	28.77	29.43	31.77	22.67	19.81	30.76	23.56	26.39	40.3	28.45	27.56	21.8	25.59	30.22	31.86	33.27	22.11	24.54		bonsai	37.9883	28.7017	30.765	25.8267	28.57		bonsai	1.63	0.0235751	-1.63	-0.484924	0.177662	0.00634352
bor	14.38	11.6	15.38	18.47	15.32	17.06	17.54	5.95	17.53	7.6	15.39	6.33	14.95	12.83	10.11	10.01	15.3	13.03	10.59	8.22	6.23	20.65	9.44	10.37	24.37	11.89	8.26	13.87	11.47	11.48	13.07	17.54	19.24	13.26		bor	15.3683	11.7233	12.705	10.9167	14.445		bor	0.42	0.380002	-0.42	-0.380863	0.289973	0.189033
bora	3.14	6	5.9	2.26	6.56	4.59	3.25	2.08	10.15	3.44	4.67	2.6	2.66	7.57	5.66	8.31	7.05	8.28	3.46	3.47	2.46	3.01	1.37	3.3	5.1	4.75	7.1	8.65	6.24	3.5	2.92	8.63	4.25	5.36		bora	4.74167	4.365	6.58833	2.845	5.65		bora	0.05	0.898124	0.05	0.0974446	0.311594	0.754486
borr	11.37	15.9	15.09	6.5	20.24	16.23	11.81	10.5	28.18	16.8	18.64	9.99	24.7	27.33	27.66	35.1	24.83	24.15	23.21	8.96	10.98	12.73	4.83	13.26	25.36	32.13	22.88	32.18	25.3	11.68	8.26	22.74	22.62	19.25		borr	14.2217	15.9867	27.295	12.3283	22.24		borr	0.54	0.287798	0.54	0.259821	0.171926	0.130728
boss	0.21	0.16	0.03	0.32	0.18	0.22	0.07	0	0.11	0	0.21	0.11	1.16	0.41	0.9	0.24	0.7	0.24	0	0.02	0.09	0	0.05	0.54	0.66	0.03	1.56	1.65	0.88	0.36	0.09	0.08	1.83	0		boss	0.186667	0.0833333	0.608333	0.116667	0.714		boss	2.29	0.00508323	2.29	2.25705	0.689233	0.00105761
botv	5.53	7.53	7.45	3.73	6.24	6.64	5.29	2.5	7.37	5.67	10.21	5.18	8.92	11.42	12.68	13.32	11.6	13.49	9.1	5.88	4.64	4.92	3.63	6.22	12.1	13.81	14.42	12.65	12.63	6.48	5.25	11.93	5.35	11.04		botv	6.18667	6.03667	11.905	5.73167	10.566		botv	1.11	0.0776421	1.11	0.449724	0.201843	0.0258748
bou	13.87	13.75	23.23	15.02	21.51	16.97	16.68	18.93	8.2	15.97	14.26	18.1	5.94	7.99	5.45	1.81	4.19	8.41	12	9.85	18.21	18.17	11.32	14.9	5.57	6.11	3.2	6.97	5.22	10.26	13.44	2.81	6.68	10.34		bou	17.3917	15.3567	5.63167	14.075	7.06		bou	5.32	4.78362e-06	-5.32	-2.02437	0.3987	3.82572e-07
bowl	3.21	2.74	2.52	4.96	5.44	3.61	2.45	3.27	1.54	4.77	2.48	2.36	0.96	1.55	0.8	0.74	1.39	1.73	1.4	2.47	3.64	3.98	3.2	3.98	0.54	0.69	1.82	1.94	2.07	2.23	1.96	0.94	2.24	1.89		bowl	3.74667	2.81167	1.195	3.11167	1.632		bowl	5.59	2.5724e-06	-5.59	-1.82678	0.350683	1.89649e-07
BoYb	0.12	0.8	0.49	0.12	0.5	0.7	0.18	0.03	0.89	0.3	0.45	0.37	0.6	1.36	2.33	0.76	2.14	1.19	0.53	0.13	0.33	0.36	0	0.45	0.33	1.01	1.35	1.8	1.68	0.46	0.04	0.83	0	0.69		BoYb	0.455	0.37	1.39667	0.3	0.819		BoYb	1.74	0.0183176	1.74	1.38071	0.488663	0.00472098
br	1	1.61	1.62	1.6	5.04	2.44	1.05	2.1	3.9	3.71	1.94	3	2.31	15.98	15.69	14.22	9.08	9.15	2.93	2.06	3.27	1.7	2.56	3.62	2.2	7.01	10.76	8.32	13.71	1.77	1.58	3.61	2.08	2.46		br	2.21833	2.61667	11.0717	2.69	5.35		br	2.78	0.00166057	2.78	1.43924	0.397341	0.000292126
Br140	4.02	3.97	3.2	3	5.69	4.71	2.11	1.52	3.53	4.13	4.28	3	3.03	4.04	6.74	4.6	4.93	6.17	4.85	2.8	1.96	2.03	2.12	3.16	4.97	3.98	3.64	2.9	5	2.58	2.46	4.82	1.78	3.58		Br140	4.09833	3.095	4.91833	2.82	3.571		Br140	0.09	0.813107	0.09	0.117157	0.229609	0.609879
brat	3.17	6.81	5.04	2.91	10.94	6.35	4.12	4.77	8.44	9.07	5.45	4.61	8.77	23.22	30.3	30.43	13.63	15.89	7.53	5.08	6.49	3.75	3.64	11.25	9.76	16.9	23.28	24.83	27.92	4.8	5.01	14.44	7.32	7.93		brat	5.87	6.07667	20.3733	6.29	14.219		brat	3.42	0.000377443	3.42	1.14774	0.28417	5.3702e-05
Brca2	1.6	2.58	2.27	2.2	5.17	2.75	2.11	1.51	3.05	3.23	3.86	2.6	2.38	3.71	4.95	4.97	3.62	3.05	4.12	2.2	1.7	3.04	2.05	2.89	3.01	3.1	4.43	5.15	5.32	2.64	2.77	7.04	0.57	2.36		Brca2	2.76167	2.72667	3.78	2.66667	3.639		Brca2	0.07	0.851876	-0.07	-0.0853956	0.200731	0.670528
Brd	0	0	0.3	3.01	23.18	6.99	3.66	5.53	0.64	28.65	3.66	0	0	0	2.02	0.96	0.81	3.18	0	1.07	17.13	5.84	4.6	27.59	2.22	0.32	0	0	0.86	0.28	0.81	0.37	0	0		Brd	5.58	7.02333	1.16167	9.37167	0.486		Brd	1.56	0.0272936	-1.56	-2.68962	1.00676	0.00754992
Brd8	2.98	3.91	2.94	2.32	4.26	4.36	2.42	2.9	6.5	2.61	4.31	2.43	6.49	5.53	6.21	5.22	3.6	2.87	3.18	3.03	1.76	2.76	2.21	3.11	4.21	3.72	7.19	6.48	4.28	2.45	1.85	3.43	1.1	2.29		Brd8	3.46167	3.52833	4.98667	2.675	3.7		Brd8	0	0.993985	0	-0.00562828	0.277239	0.983803
Bre1	6.68	7.53	6.87	5.24	10.37	7.78	7.29	5.51	10.21	8.18	8.53	5.54	9.84	14.38	16.81	16.56	16.61	20.1	7.76	4.4	5.34	6.41	5.58	11.98	16.88	15.56	22.8	20.79	20.73	7.3	7.29	20.3	9.43	13.53		Bre1	7.41167	7.54333	15.7167	6.91167	15.461		Bre1	3.34	0.000453139	3.34	0.500307	0.125424	6.6376e-05
Brf	2.07	2.59	2.5	1.96	3.17	2.42	1.47	2.1	2.73	2.61	3.78	2.65	2.73	3.55	3.88	3.89	3.48	2.76	2.56	2.08	1.88	1.97	1.49	2.69	3.08	3.33	3.2	3.44	3.91	1.86	2.04	3.58	1.57	2.72		Brf	2.45167	2.55667	3.38167	2.11167	2.873		Brf	0.21	0.61057	-0.21	-0.160279	0.179559	0.372059
brk	1.76	2.48	2.03	2.05	5.7	3.8	1.83	2.01	2.84	3.7	2.26	2.53	1.12	4.19	5.28	4.19	3.85	3.53	1.79	1.26	2.57	1.94	2.59	2.07	1.4	3.53	3.45	2.1	5.03	1.19	0.99	1.86	1.66	1.17		brk	2.97	2.52833	3.69333	2.03667	2.238		brk	0.02	0.955607	-0.02	-0.0411702	0.277493	0.882055
brm	13.34	13.39	9.38	12.84	10.83	14.25	9.49	11.72	12.18	9.63	10.82	11.45	11.03	10.87	12.92	14.19	10.55	11.96	10.64	11.69	10.74	11.73	10.86	11.42	10.41	12.47	13.81	13.24	12.95	12.22	10.16	11.86	9.01	13.33		brm	12.3383	10.8817	11.92	11.18	11.946		brm	1.87	0.0134851	-1.87	-0.460612	0.156726	0.00329316
Brms1	13.79	18.66	16.2	10.81	20.9	21.39	8.62	7.04	23.24	18.33	21.13	11.6	20.11	19.64	27.36	26.67	30.42	31.01	22.63	10.95	11.22	11.12	10.39	18.81	24.88	20.57	25.13	31.23	21.45	12.85	11.98	26.68	12.86	16.59		Brms1	16.9583	14.9933	25.8683	14.1867	20.422		Brms1	0.37	0.423075	0.37	0.276576	0.225128	0.21925
brn	3.33	7.65	8.38	3.52	10.13	6.2	7.08	5.33	5.61	5.35	7.74	6.57	9.38	15.71	13.65	9.59	10.8	10.72	6.72	6.26	3.89	7.11	5.07	4.69	8.97	7.94	4.65	7.37	14.72	4.87	3.75	14.17	5.81	5.07		brn	6.535	6.28	11.6417	5.62333	7.732		brn	0.54	0.288406	0.54	0.301205	0.199504	0.131103
Bro	0.28	0	0	0	0.39	0.42	0.29	0	0	0.54	0	0.35	0.32	2.94	0.21	0	0.19	0.23	0.34	0	0	0.57	0	0	0	0	0	0.72	0	0	0	0	2.18	0		Bro	0.181667	0.196667	0.648333	0.151667	0.29		Bro	0.17	0.672721	0.17	0.861461	1.10345	0.434981
brp	0.21	0.2	0.15	0.49	0.96	0.85	0.27	0.31	0.25	0.69	0.34	0.1	0.3	0.38	0.18	0.59	0.37	0.99	0.11	0.13	0.7	0.69	0.41	0.77	0.38	0.11	0.28	0.75	0.44	0.14	0.14	0.21	0.49	0.1		brp	0.476667	0.326667	0.468333	0.468333	0.304		brp	0.02	0.963124	-0.02	-0.0547406	0.460949	0.905468
bru1	1.3	0.81	0.87	1.05	1.78	0.87	0.73	0.46	2.35	0.83	1.23	1.08	3.53	6.18	6.28	6.16	6.1	7.3	0.87	1.14	0.61	0.89	0.58	4.16	3.93	8.24	9.36	9.91	8.37	3.12	3.73	8.83	4.03	6.03		bru1	1.11333	1.11333	5.925	1.375	6.555		bru1	11.04	9.05411e-12	11.04	1.88913	0.257136	2.03021e-13
bru2	2.55	1.7	1.09	2.69	1.24	2	1.18	1.38	1.52	1.41	2.22	1.77	0.87	0.91	0.62	0.69	1.01	0.54	0.7	1.64	1.34	1.87	1.61	0.84	0.7	0.43	0.91	1.11	1.19	2.39	1.71	0.9	1.22	1.82		bru2	1.87833	1.58	0.773333	1.33333	1.238		bru2	9.66	2.20243e-10	-9.66	-1.57779	0.229471	6.16566e-12
bru3	0.45	0.16	0.22	0.45	0.78	0.53	0.27	0.2	0.64	0.35	0.33	0.08	0.36	0.85	0.48	0.5	0.69	0.46	0.29	0.34	0.37	0.47	0.25	0.68	0.59	0.37	0.79	1.02	0.87	0.46	0.35	0.44	0.66	0.4		bru3	0.431667	0.311667	0.556667	0.4	0.595		bru3	0.27	0.538392	0.27	0.340097	0.331259	0.304572
Bruce	6.46	7.52	6.27	6.08	9.11	7.79	4.93	5.85	9.15	6.47	7.39	6.59	11.98	11.72	12.3	12.89	13.06	10.34	7.49	5.35	5.12	5.13	5.12	8.71	10.19	7.39	13.38	13.26	15	7.55	7.33	12.41	9.49	8.69		Bruce	7.205	6.73	12.0483	6.15333	10.469		Bruce	1.22	0.0602804	1.22	0.286452	0.122328	0.0191978
brun	5.19	6.68	5.99	4.63	6.98	6.26	5.17	3.84	7.24	4.21	6.84	4.25	11.96	8.18	10.21	8.6	10.03	8.74	6.48	4.57	3.31	4.14	4.82	6.53	13.06	8.71	10.25	9.16	8.04	6.4	4.51	9.47	8.66	7.61		brun	5.955	5.25833	9.62	4.975	8.587		brun	0.87	0.133968	0.87	0.343405	0.17533	0.0501572
brv1	0	0	0	0	0.55	0	0	0	1.95	0.05	0	0	0	0.88	0	0.19	0.32	0.44	0	0.08	0	0	0	0	0	0	0	0.53	0	0	0	0.07	0	0		brv1	0.0916667	0.333333	0.305	0.0133333	0.06		brv1	0.03	0.942007	-0.03	-0.245008	1.27924	0.848114
brv2	0.12	0	0	0	0.89	0	0	0	1.11	0.2	0	0	0	0.77	0.12	0.32	1.36	0.89	0.28	0.04	0.11	0	0	0	0	0	0.55	0.94	0	0.11	0.22	0.52	0	0		brv2	0.168333	0.218333	0.576667	0.0716667	0.234		brv2	0.15	0.704716	0.15	0.833907	1.15482	0.470226
brv3	5.32	3.35	2.68	5.26	5.51	5.84	4.33	3.33	7.04	2.19	5.53	2.03	1.86	4.54	3.37	3.14	4.04	4.21	2.89	9.57	3.87	6.53	6.2	2.28	4.16	3.56	2.24	5.54	3.85	5.96	2.71	4.65	1.74	7.41		brv3	4.66	4.075	3.52667	5.22333	4.182		brv3	1.51	0.0306278	-1.51	-0.722489	0.27501	0.00861063
BRWD3	2.64	2.76	2.46	2.74	4.14	3.25	2.17	2.21	4.03	2.71	3.07	2.01	4.22	4.36	4.94	4.89	3.57	3.16	3.21	1.68	2.32	2.93	2.05	2.48	3.54	5.1	5.52	5.17	4.61	2.76	2.08	4.14	3.76	2.83		BRWD3	2.99833	2.7	4.19	2.445	3.951		BRWD3	0.12	0.751927	0.12	0.0943389	0.148421	0.525025
bs	0.43	0.46	0.58	0.43	0.59	0.48	0.48	0.3	0.48	0.43	0.45	0.37	0.28	0.69	0.5	0.52	0.57	0.55	0.63	0.44	0.33	0.63	0.27	0.42	0.39	0.45	0.57	0.74	0.59	0.46	0.32	0.53	0.68	0.34		bs	0.495	0.418333	0.518333	0.453333	0.507		bs	0.57	0.271064	-0.57	-0.257367	0.166239	0.12158
bsf	24.75	17.53	22.06	21.95	13.09	22.15	16.39	6.87	15.18	11.13	19.94	9.14	15.52	13.23	16.09	19.86	15.73	16.45	13.18	10.32	9.1	19.15	11.59	11.93	20.44	14.37	17.21	13.49	15.34	12.86	13.78	16.13	13.8	13.16		bsf	20.255	13.1083	16.1467	12.545	15.058		bsf	0.32	0.477888	-0.32	-0.229191	0.202215	0.257047
Bsg	38.91	35.18	32.14	41.64	28.81	35.03	34.12	29.09	32.61	26.91	39.26	29.04	39.01	47.33	45.17	44.94	41.85	37.33	33.23	31.69	27.23	37.48	30.69	31.98	35.56	37.54	42.1	40.18	47.04	34.28	30.76	42.5	29.81	39.49		Bsg	35.285	31.8383	42.605	32.05	37.926		Bsg	0.38	0.415285	-0.38	-0.158733	0.127558	0.213353
Bsg25A	0	0	0	0	0	0	0	0	0	0	0	0	0	0	0	0	0	0	0	0.04	0	0	0	0	0	0	0	0	0	0	0	0	0	0		Bsg25A	0	0	0	0.00666667	0		Bsg25A	0	NA	0	NA	NA	NA
Bsg25D	3.01	5.35	3.61	3.44	5.64	4.32	2.3	4.48	6.18	4.45	4.03	4.15	3.95	8.51	8.66	8.7	8.72	5.4	4.19	3.89	3.39	3.72	3.64	6.27	4.77	6.78	8.81	5.93	7.74	4.14	4.47	7.74	3.23	5.98		Bsg25D	4.22833	4.265	7.32333	4.18333	5.959		Bsg25D	0.19	0.641679	0.19	0.191506	0.229321	0.40366
bsh	0	0	0	0	0	0.05	0	0	0	0	0	0	0	0	0.05	0.05	0	0.41	0	0	0	0.04	0.19	0.22	0	0	0	0	0	0	0	0	0	0		bsh	0.00833333	0	0.085	0.075	0		bsh	0	NA	0	1.47704	1.35571	0.275938
bsk	14.64	21.85	15.31	15.39	22.32	16.06	21.22	10.38	23.03	16.44	17.18	11.4	20.52	25.28	37.17	26.17	23.52	19.54	22.36	12.29	10.75	14.16	13.22	17.48	16.46	22.74	28.71	24.58	30.07	16.08	16.66	23.39	20.09	18.92		bsk	17.595	16.6083	25.3667	15.0433	21.77		bsk	0.05	0.899552	0.05	0.0578303	0.187706	0.758014
bt	124.12	126.59	166.48	196.25	132.22	128.95	118.98	111.5	50.1	146.1	105.57	208.91	63.01	8.41	8.85	7	16.92	39.5	162.65	79.54	130.01	135.82	137.21	165.02	50.79	5.86	10.21	10.07	8.08	106.35	137.92	33.99	41.47	73.91		bt	145.768	123.527	23.9483	135.042	47.865		bt	4.35	4.42585e-05	-4.35	-2.75065	0.600701	4.67034e-06
BTBD9	6.58	5.12	5.76	5.72	7.71	6.51	5.08	6.68	14.38	5.1	6.93	4.51	5.6	8.45	7.8	7.31	10.21	7.52	6.53	7.5	7.08	6.59	6.02	5.59	6.29	5.37	7.46	11.96	6.92	6.69	3.56	5.3	4.93	6.39		BTBD9	6.23333	7.11333	7.815	6.55167	6.487		BTBD9	0.69	0.203383	-0.69	-0.386675	0.224174	0.0845483
BtbVII	9.06	11.18	10.6	8.68	15.61	12.95	7.69	8.15	10.93	11.53	11.24	9.09	12.88	15.58	17.97	17.12	16.59	13.3	12.9	7.82	8.52	9.07	7.49	13.94	13.89	12.22	17.79	15.4	19.19	8.97	9.5	18.42	9.56	10.62		BtbVII	11.3467	9.77167	15.5733	9.95667	13.556		BtbVII	0.23	0.588192	0.23	0.101167	0.108196	0.349771
btd	0.03	0	0.51	0.17	2.52	0.83	0.22	0.44	0.03	0.99	0.14	0.04	0	0.37	0	0	0.26	0.25	0	0.17	1.07	0.42	0.04	0.85	0.39	0	0	0.05	0.14	0.13	0	0	1.34	0		btd	0.676667	0.31	0.146667	0.425	0.205		btd	0.52	0.298913	-0.52	-1.46292	0.985034	0.137504
BthD	19.96	38.23	32.7	16.32	40.65	41.35	22.89	21.39	37.74	36.71	39.95	29.18	45.52	45.48	56.02	57.52	46.8	46.54	38.18	25.94	28.58	17.61	22.24	35.13	39.73	35.21	49.61	34.15	58.95	18.54	19.43	62.19	30.69	28.79		BthD	31.535	31.31	49.6467	27.9467	37.729		BthD	0.22	0.607029	0.22	0.114489	0.127372	0.368729
Btk29A	2.11	1.83	2.49	2.21	3.26	2.52	1.56	1.5	2.77	2.78	2.62	2.51	1.18	4.78	4.85	4.08	3.49	3.06	2.61	1.52	2.74	1.89	1.43	2.89	1.59	2.57	4.61	3.91	4.83	1.37	1.29	2.1	2.7	1.6		Btk29A	2.40333	2.29	3.57333	2.18	2.657		Btk29A	0.02	0.949033	0.02	0.0451981	0.266897	0.865524
btl	1.95	1.07	1.33	1.44	1.2	1.36	1.7	1.59	0.75	1.21	1.07	0.88	0.85	7.82	8.34	9.14	5.01	4.54	0.95	1.1	1.41	1.79	0.77	2.89	1.87	7.86	8.36	9.98	8.34	1.38	2.97	4.32	1.54	3.01		btl	1.39167	1.2	5.95	1.485	4.963		btl	2.67	0.00212973	2.67	1.57405	0.443688	0.000388698
btn	3.77	4.32	6.78	5.04	4	6.82	3.85	1.54	5.21	2.8	7.56	2.05	7	1.47	7.56	3.55	6.18	3.9	5.76	6.31	1.67	6.66	0.9	0.94	3.41	4.32	6.4	0.93	2.65	1.58	0.45	4.56	0	3.86		btn	5.12167	3.835	4.94333	3.70667	2.816		btn	0.04	0.908753	-0.04	-0.125813	0.445689	0.777722
Btnd	8.97	7.16	0.54	6.29	1.28	3.54	0.58	5.48	1.15	0.19	4.84	5.13	2.9	0.38	0.07	0.16	0.21	0.41	0.12	5.67	0	3.29	2.5	0.52	1	0.42	0	0	0.45	8.68	0.83	0.29	0.79	4.08		Btnd	4.63	2.895	0.688333	2.01667	1.654		Btnd	1.48	0.0328479	-1.48	-2.27669	0.875741	0.00932963
btsz	0.96	1.08	0.75	1.08	1.56	1.14	0.76	1.07	0.74	1.03	1.16	0.96	0.75	0.47	0.24	0.27	0.48	0.45	0.7	1.09	0.91	0.73	0.95	0.91	0.47	0.17	0.31	0.56	0.35	0.68	0.67	0.6	0.44	0.8		btsz	1.095	0.953333	0.443333	0.881667	0.505		btsz	4.73	1.8598e-05	-4.73	-1.62444	0.339978	1.76987e-06
btv	0.27	0.2	0.31	0.3	0.64	0.35	0.26	0.25	0.55	0.36	0.29	0.29	0.31	0.6	0.63	0.61	0.58	0.55	0.31	0.28	0.4	0.1	0.07	0.3	0.38	0.42	0.52	0.38	0.77	0.24	0.16	0.37	0.46	0.34		btv	0.345	0.333333	0.546667	0.243333	0.404		btv	0.22	0.597507	0.22	0.163689	0.17828	0.358537
btz	6.05	4.25	6.14	5.41	9.04	5.53	4.96	6.92	6.34	5.89	5.66	4.38	4.87	8.93	8.78	9.81	9.13	7.86	6.16	5.54	5.32	5.67	4.07	7.78	5.97	7.49	5.78	6.87	8.63	6.19	4.15	7.66	7.51	8.46		btz	6.07	5.69167	8.23	5.75667	6.871		btz	0.06	0.874293	-0.06	-0.0664341	0.179279	0.710964
Bub1	2.83	3.83	3.93	3.16	5.12	3.72	2.49	1.39	8.29	2.87	3.6	2.45	4.16	6.32	6.56	7.94	7.22	8.14	5.06	3.8	3.57	3.13	2.85	4.09	7.5	5.48	7.31	8.99	8.52	4.93	3.66	9.93	2.35	4.72		Bub1	3.765	3.515	6.72333	3.75	6.339		Bub1	0.6	0.249446	0.6	0.448573	0.280423	0.10968
Bub3	13.13	19.84	23.14	12.66	23.87	20.09	17.53	13.35	30.09	17.53	27.36	12.91	22.76	26.47	31.76	35.41	28.69	24.29	24.1	15.2	16.46	14.41	11.42	17.96	26.02	37.52	22.71	34.05	24.01	14.6	11.99	33.1	22.21	18.75		Bub3	18.7883	19.795	28.23	16.5917	24.496		Bub3	0.02	0.959968	-0.02	-0.0189713	0.143823	0.895058
BubR1	2.62	4.05	2.96	1.76	4.67	2.08	2.54	1.88	5.99	2.83	4.64	2.81	3.93	5.19	5.14	6.77	5.22	4.6	3.07	2.88	1.29	2.38	1.53	4.27	3.02	3.9	6.08	5.29	6.17	1.53	1.84	6.06	0.67	2.58		BubR1	3.02333	3.44833	5.14167	2.57	3.714		BubR1	0.05	0.895894	0.05	0.058302	0.182971	0.749999
Buffy	0.59	0.41	0.53	0.84	0.28	0.55	0.2	0.41	0.44	0.32	0.52	0.68	0.24	1.01	0.87	0.62	1.12	1.02	0.43	0.85	0.49	0.51	0.7	0.45	0.6	0.81	1.37	1.39	1.3	0.94	0.94	1.29	1.18	0.46		Buffy	0.533333	0.428333	0.813333	0.571667	1.028		Buffy	0.19	0.652593	0.19	0.302918	0.370777	0.41394
bug	20.64	23.77	22.03	15.89	30.05	28.45	18.92	13.16	32.38	20.46	27.5	18.45	22.38	38.17	41.03	41.55	30.38	36.39	31.35	19.31	17.53	16.91	11.65	21.93	28.54	34.09	37.36	38.14	38.84	20.77	22.69	41.51	35.05	28.7		bug	23.4717	21.8117	34.9833	19.78	32.569		bug	0.26	0.548422	0.26	0.136026	0.134826	0.313022
Bug22	16.69	12.25	17.22	13.42	28.95	21.25	13.04	7.61	38.93	16.79	16.62	13.46	22.57	26.71	22.49	23.59	21.65	31.03	23.26	16.53	14.41	16.88	8.76	13.17	22.72	18.92	20.1	19.44	16.2	12.33	15.7	21.66	9.89	20.87		Bug22	18.2967	17.7417	24.6733	15.5017	17.783		Bug22	0	0.995895	0	-0.00351066	0.25604	0.98906
BuGZ	13.52	20.38	18.97	10.81	21.38	21.03	16.45	9.69	18.71	18.48	25.42	14.66	23.02	21.54	27.01	27.95	23.07	20.15	23.13	13.34	12.85	14.69	9.32	18.49	25.6	17.55	24.69	20.01	25.94	14.72	14.28	28.59	15.73	19.37		BuGZ	17.6817	17.235	23.79	15.3033	20.648		BuGZ	0.08	0.833499	-0.08	-0.0733021	0.158136	0.642979
bun	6.26	7.64	6.51	5.64	11.6	8.31	6.12	7.09	11.78	8.7	9.1	8.09	10.66	23.34	27.21	26.37	22.75	18.57	11.55	9.23	8.17	6.99	6.43	12.02	9.52	17.25	28.99	25.63	32.4	8.93	8.1	16.53	8.89	11.43		bun	7.66	8.48	21.4833	9.065	16.767		bun	4.06	8.66323e-05	4.06	0.754132	0.170797	1.00834e-05
bur	7.35	10.64	10.33	7.14	10.86	8.58	6.73	6.68	11.27	8.71	10.24	8.09	17.32	15.12	16.52	17.19	17.53	12.19	10.65	6.06	5.7	6.63	6.06	12.02	17.31	13.05	15.4	16.61	18.48	9.35	7.57	18.64	10.54	15.41		bur	9.15	8.62	15.9783	7.85333	14.236		bur	1.36	0.0441264	1.36	0.3451	0.139231	0.0131897
Burs	0.94	0.9	0	0.76	1.16	1.32	0.57	1.29	0.3	1.93	0.15	0	0	0	0.6	0	0	0	0	1.56	0.57	0.19	0	0	0	0	0	0	0	0	1.32	0	0	0.23		Burs	0.846667	0.706667	0.1	0.386667	0.155		Burs	1.08	0.0829525	-1.08	-2.54584	1.15931	0.0280924
bves	2.27	1.81	1.82	2.54	2.01	2.35	1.63	2.22	2.21	2.01	1.73	2.02	2.93	7.23	7.84	7.49	5.75	5.66	1.82	2.52	1.73	2.26	1.94	4.33	2.97	8.26	12.99	10.34	10.46	2.19	3.19	5.82	2.81	4.78		bves	2.13333	1.97	6.15	2.43333	6.381		bves	4.55	2.82549e-05	4.55	1.00881	0.215372	2.81263e-06
bw	0.73	0.82	0.69	0.64	0.82	0.7	0.6	0.27	0.9	0.53	0.84	0.48	0.3	1.93	1.16	0.76	0.96	0.94	0.92	0.59	0.72	0.56	0.28	0.67	0.79	1.16	1.24	1.54	1.09	0.48	0.64	1.11	0.62	0.56		bw	0.733333	0.603333	1.00833	0.623333	0.923		bw	0.11	0.77225	0.11	0.19863	0.334289	0.552387
bwa	1.49	2.45	1.37	0.87	1.52	1.55	1.16	1.03	2.28	1.23	1.43	0.97	2.72	2.87	2.64	1.85	2.18	2.89	1.53	2.76	2.11	0.76	1.22	2.27	3.24	3.24	2.23	3.74	2.91	1.59	1.16	3.72	1.77	2.65		bwa	1.54167	1.35	2.525	1.775	2.625		bwa	0.84	0.145717	0.84	0.367703	0.192127	0.0556391
Bx	1.46	1.5	1.33	1.68	1.48	1.84	1.26	1.05	1.47	1.46	1.45	0.99	1.86	2.04	1.88	1.58	1.8	1.66	0.99	1.18	0.99	1.25	1.21	1.45	1.74	1.44	1.92	2.17	2.24	1.15	1.15	1.82	1.89	1.19		Bx	1.54833	1.28	1.80333	1.17833	1.671		Bx	0.09	0.814369	-0.09	-0.0629133	0.124162	0.612362
Bx42	25.4	32.2	28.22	23.33	36.4	33.99	20.04	17.36	25.59	29.33	28.52	23.62	42.92	35.03	45.2	39.05	39.2	35.88	32.07	26.23	20.52	23.07	16.74	26.44	40.82	35.37	44.12	34	38.19	25.44	25.97	49.71	20.49	28.82		Bx42	29.9233	24.0767	39.5467	24.1783	34.293		Bx42	0.29	0.511113	0.29	0.161254	0.150104	0.282698
bxd	0.24	0.06	0.1	0.26	0.32	0.13	0.11	0.06	0.46	0.1	0.12	0.1	0.09	0.65	0.18	0.13	0.47	0.24	0.13	0.13	0.06	0.17	0.11	0.18	0.15	0.1	0.54	0.46	0.65	0.15	0.09	0.14	0.56	0.1		bxd	0.185	0.158333	0.293333	0.13	0.294		bxd	0.18	0.655442	0.18	0.415499	0.512165	0.417217
by	2.84	1.58	2.64	3.17	4	1.85	4.71	2	2.53	2.1	3.26	1.89	2.1	0.85	0.9	0.75	1.17	1.63	3.19	2.57	1.55	4.94	4.9	4.24	1.05	0.72	0.47	0.63	0.67	3.37	4.8	0.79	1.15	2.86		by	2.68	2.74833	1.23333	3.565	1.651		by	4.23	5.82367e-05	-4.23	-1.67307	0.370622	6.35511e-06
byn	0.92	0.42	0.37	0.5	0	0.05	0.12	0.25	0.12	0.01	0.46	0.89	0.2	0.05	0.11	0.04	0.08	0.01	0.19	0.36	0.1	0.23	0.19	0.12	0.09	0	0.15	0.12	0.33	0.29	0.71	0.04	0.33	0.5		byn	0.376667	0.308333	0.0816667	0.198333	0.256		byn	1.81	0.0155004	-1.81	-2.23997	0.775842	0.00388747
bys	20.77	23.86	23.44	21.8	24.14	31.89	20.77	5.77	21.92	23.27	27.79	15.76	28.67	20.61	32.35	23.84	19.72	25.37	26.06	15.51	11.64	18.8	11.87	17.45	27.33	21.04	25.14	20.7	26.42	17.89	17.05	29.24	16.9	14.89		bys	24.3167	19.2133	25.0933	16.8883	21.66		bys	0.07	0.845386	-0.07	-0.123873	0.282231	0.660729
c(2)M	12.75	14.23	12	11.75	10.04	14.27	13.08	6.85	13.83	9.04	14.72	7.65	15.42	15.24	16.42	16.37	15.49	17.95	11.11	10.47	8.54	10.81	7.98	9.36	21.32	20.57	14.22	15.31	12.35	15.86	9.9	17.61	12.71	14.33		c(2)M	12.5067	10.8617	16.1483	9.71167	15.418		c(2)M	0.03	0.938058	0.03	0.0318255	0.155154	0.837477
c(3)G	1.77	5.8	2.97	1.08	7.75	3.37	2.28	2.01	3.02	4.39	3.08	2.27	6.99	4.49	5.6	5.1	6.08	3.78	4.42	2.85	1.65	2.41	1.1	3.17	3.38	4.51	5.71	4.47	6.54	1.98	1.96	5.44	3.23	3.16		c(3)G	3.79	2.84167	5.34	2.6	4.038		c(3)G	0.55	0.282461	0.55	0.369152	0.242475	0.127901
c-cup	0.6	0.12	0	0.16	8.91	0.66	0	0.52	8.01	0.57	0.06	0	0.51	3.57	0.57	1.99	6.73	8	0.93	2.54	0.15	0.23	0	0.19	0.71	0	0.68	3.32	0.61	0.8	0.99	2.42	0	0.65		c-cup	1.74167	1.52667	3.56167	0.673333	1.018		c-cup	0.17	0.678073	0.17	0.771427	0.999689	0.440312
C1GalTA	8.81	17.56	16.61	6.7	14.87	13.75	11.04	8.19	16.15	11.75	18.18	9.16	19.46	19.14	24.64	23.74	21.57	21.46	23.08	11.21	10.14	8.93	6.43	15.57	24.65	19.64	19.5	19.21	21.06	10.43	10.04	37.58	24.21	22.68		C1GalTA	13.05	12.4117	21.6683	12.56	20.9		C1GalTA	1.19	0.0652485	1.19	0.271132	0.117566	0.021099
C3G	2.85	4.39	4.52	2.94	3.85	3.68	3.23	2.46	3.36	3.23	4.89	3.19	26.25	16.47	23.87	23.51	27.01	26.65	4.6	3.23	2.66	3.06	2.52	20.9	26.99	25.33	35.36	31.37	38.31	13.26	14.69	34.12	20.62	25.22		C3G	3.705	3.39333	23.96	6.16167	26.527		C3G	31.67	2.15907e-32	31.67	2.26171	0.184013	1.01227e-34
c11.1	3.36	5.56	5.32	3.34	5.27	4.38	3.34	5.17	8.31	4.2	3.9	4.22	9.25	9.81	12.75	13.01	10.61	8.5	5.28	5.43	4.38	3.46	3.33	7.39	11.18	11.49	14.15	15.38	11.83	5.36	5.43	12.99	7.48	10.04		c11.1	4.53833	4.85667	10.655	4.87833	10.533		c11.1	1.76	0.0174078	1.76	0.571118	0.200824	0.00445678
c12.1	23.13	27.17	23.51	16.14	18.84	18.47	24.36	14.62	33.69	20.94	25.11	16.05	29.52	29.09	31.76	41.71	27.56	32.39	27.97	17.86	18.78	18.33	13.56	24.34	29.26	43.84	35.23	32.8	36.65	18.48	22.1	30.04	20.79	17.8		c12.1	21.21	22.4617	32.005	20.14	28.699		c12.1	0.03	0.938579	-0.03	-0.0293256	0.14648	0.841322
c12.2	6.22	3.81	5.01	6.31	3.83	6.02	5.07	2.14	4.15	3.22	4.26	3.05	5.05	3.76	3.74	3.72	3.69	4.21	4.53	3.16	2.98	4.1	3.53	2.42	5.1	4.14	2.24	3.91	3.2	4.95	5.11	3.41	1.02	3.19		c12.2	5.2	3.64833	4.02833	3.45333	3.627		c12.2	0.77	0.170814	-0.77	-0.399482	0.218695	0.0677506
C15	0.07	0.03	0.04	0.12	0.09	0.01	0.03	0.08	0	0.13	0.02	0.03	0	0.06	0.01	0	0.02	0	0.15	0.02	0.08	0.09	0.07	0.04	0	0	0	0	0	0	0.06	0.03	0.03	0		C15	0.06	0.0483333	0.015	0.075	0.012		C15	0.79	0.161423	-0.79	-1.86232	1.00257	0.0632332
C901	0.17	0.04	0.33	0.21	0.19	0.22	0.19	0.04	0.07	0.04	0.17	0.36	0.23	0.08	0	0.03	0.07	0.05	0.04	0.13	0.16	0.02	0.06	0.14	0.17	0	0	0	0	0.34	0	0	0	0.06		C901	0.193333	0.145	0.0766667	0.0916667	0.057		C901	0.6	0.250785	-0.6	-1.30295	0.816194	0.110405
ca	1.31	1.28	1.39	1.34	1.8	0.89	1.85	0.75	2.01	1.34	1.31	1.15	1.39	1.81	2	3.07	2.08	1.51	1.11	1.05	1.32	0.94	0.58	1.04	1.44	1.55	2.35	2.87	2.09	1.03	2.06	2.12	1.49	1.3		ca	1.335	1.40167	1.97667	1.00667	1.83		ca	0.05	0.90104	-0.05	-0.0682224	0.224854	0.76158
Ca-alpha1D	2.07	1.4	2.15	2.42	1.52	1.87	2.15	1.16	0.62	1.3	1.64	1.11	0.84	0.41	0.45	0.35	0.73	0.96	1.89	0.5	1.24	2.51	1.7	2.08	0.92	0.11	0.42	0.94	0.55	1.04	1.8	0.67	1.17	1.35		Ca-alpha1D	1.905	1.33	0.623333	1.65333	0.897		Ca-alpha1D	3.69	0.000204915	-3.69	-1.64093	0.390775	2.67892e-05
Ca-alpha1T	0.52	0.17	0.34	0.59	0.34	0.62	0.34	0.23	0.25	0.37	0.41	0.21	0.32	0.73	0.49	0.4	0.6	0.42	0.25	0.18	0.29	0.47	0.28	0.64	0.42	0.22	0.78	0.98	1.22	0.49	0.29	0.29	0.99	0.25		Ca-alpha1T	0.43	0.301667	0.493333	0.351667	0.593		Ca-alpha1T	0.09	0.81481	0.09	0.114418	0.226428	0.613336
Ca-beta	0.44	0.33	0.55	0.54	0.51	0.48	0.31	0.21	0.21	0.36	0.32	0.36	0.25	0.29	0.24	0.22	0.3	0.28	0.34	0.21	0.24	0.43	0.38	0.43	0.27	0.1	0.38	0.59	0.42	0.29	0.38	0.21	0.59	0.19		Ca-beta	0.475	0.295	0.263333	0.338333	0.342		Ca-beta	2.25	0.00559655	-2.25	-0.758181	0.233801	0.00118342
CaBP1	157.05	248.91	238.51	185.99	206.67	274.81	165.52	213.68	245.94	247.94	242.37	191.13	378.48	260.04	373.94	355.86	278.67	313.54	296.27	247.6	189.58	162.74	167.93	211.14	412.81	338.07	319.18	336.64	305.47	332.36	193.82	395.15	295.27	274.01		CaBP1	218.657	217.763	326.755	212.543	320.278		CaBP1	0.02	0.952261	0.02	0.0273802	0.174658	0.87543
cac	0.34	0.26	0.52	0.84	1.27	1.35	0.57	0.42	0.56	0.93	0.44	0.21	0.55	0.97	0.77	0.57	0.91	0.75	0.28	0.19	0.98	0.74	0.65	1.72	0.85	0.32	0.97	1.47	1.38	0.39	0.42	0.33	1.51	0.19		cac	0.763333	0.521667	0.753333	0.76	0.783		cac	0.02	0.959968	-0.02	-0.0381562	0.29114	0.895729
cact	12.81	17.33	15.82	12.62	20.31	17.98	13.85	12.94	17.25	21.08	18.01	20.32	32.71	26.4	34.35	32.01	35.33	36.97	18.31	17.24	14.55	14.96	9.1	27.85	34.87	27.87	34.42	36.03	36.93	24.17	19.42	40.52	31.26	26.11		cact	16.145	17.2417	32.9617	17.0017	31.16		cact	0.94	0.115221	0.94	0.358649	0.176122	0.0417136
cactin	5.3	5	4.7	4.46	5.35	6.41	3.47	4.94	5.84	5.47	6.13	4.84	4.65	8.02	8.68	9.88	5.3	5.28	6.72	4.6	4.46	4.38	4.67	6.4	4.91	9.72	10.88	4.73	7.38	4.7	5.46	8.13	4.72	6.38		cactin	5.20333	5.115	6.96833	5.205	6.701		cactin	0.13	0.737728	-0.13	-0.135567	0.205251	0.508937
cad	3.28	2.87	1.23	3.75	1.75	1.44	1.46	1.75	3.07	0.71	4.08	2	1.12	0.91	0.1	0.29	2.02	0.94	0.59	4.38	1.24	2.9	1.9	0.22	0.68	0.11	0.26	1.22	0.37	3.82	2.7	1.58	0.26	2.67		cad	2.38667	2.17833	0.896667	1.87167	1.367		cad	1.93	0.0117296	-1.93	-1.69511	0.566754	0.00278156
Cad74A	1.46	0.6	1.05	1.3	1.25	1.13	1.02	0.58	0.22	1.33	0.9	1.3	0.36	0.62	0.38	0.14	0.78	0.7	0.75	0.48	1.02	1.25	0.87	1.4	0.31	0.04	0.53	0.65	1.11	0.65	1.67	0.15	0.99	0.88		Cad74A	1.13167	0.891667	0.496667	0.961667	0.698		Cad74A	1.81	0.015321	-1.81	-1.42223	0.491874	0.00383474
Cad86C	0.3	0.19	0.29	0.58	0.7	0.47	0.37	0.34	0.2	0.32	0.27	0.34	1.24	0.33	0.48	0.42	0.48	0.69	0.31	0.2	0.38	0.37	0.3	1.08	1.08	0.46	0.75	0.54	0.59	0.52	0.74	1.43	1.24	0.65		Cad86C	0.421667	0.306667	0.606667	0.44	0.8		Cad86C	0.25	0.564064	0.25	0.409875	0.418008	0.326818
Cad87A	1.17	1.34	1.7	1.38	1.64	1.63	1.01	0.62	1.2	1.43	1.55	1.81	1.16	1.2	1.18	1.19	1.24	1.06	1.72	0.9	1.48	1.15	1.07	1.43	0.87	0.65	1.46	1.26	1.66	0.72	0.99	1.12	1.28	0.83		Cad87A	1.47667	1.27	1.17167	1.29167	1.084		Cad87A	1.82	0.0150744	-1.82	-0.678042	0.233993	0.00375911
Cad88C	0.2	0.01	0.11	0.03	0.04	0.09	0.05	0	0.01	0.01	0.06	0.03	0.05	0.19	0.11	0.04	0.21	0.07	0.01	0.09	0.01	0.02	0	0.13	0.24	0.05	0.26	0.43	0.22	0.05	0.06	0.16	0.17	0.02		Cad88C	0.08	0.0266667	0.111667	0.0433333	0.166		Cad88C	1.01	0.0970568	1.01	1.41551	0.667485	0.0339504
Cad89D	0.03	0.02	0.03	0.03	0	0.04	0	0	0	0.05	0	0.01	0	0.07	0.13	0.03	0.09	0.06	0.07	0	0	0	0	0.03	0.03	0	0.21	0.36	0.15	0.11	0	0.04	0	0.05		Cad89D	0.025	0.01	0.0633333	0.0166667	0.095		Cad89D	0.68	0.209647	0.68	1.7322	1.01526	0.0879785
Cad96Ca	0.63	0.61	0.79	0.46	0.48	0.35	0.39	0.37	0.03	0.49	0.57	0.69	0.31	0.49	0.32	0.28	0.27	0.28	0.48	0.66	0.51	0.55	1.02	0.62	0.18	0.13	0.54	0.92	0.81	0.71	0.72	0.26	0.23	0.34		Cad96Ca	0.553333	0.423333	0.325	0.64	0.484		Cad96Ca	0.81	0.154625	-0.81	-0.989094	0.525833	0.0599714
Cad96Cb	0.35	0.13	0.35	0.14	0.22	0.19	0.05	0.23	0.04	0.1	0.22	0.1	0.03	0.52	0.19	0.35	0.46	0.14	0.23	0.22	0.44	0.26	0.01	0.28	0.36	0.48	0.57	1.96	0.67	0.37	0.09	0	0	0.21		Cad96Cb	0.23	0.123333	0.281667	0.24	0.471		Cad96Cb	0.2	0.635663	0.2	0.516227	0.611075	0.39823
Cad99C	1.34	2.02	1.83	2.55	2.45	1.85	2.59	0.55	0.59	1.76	1.87	2.61	0.53	0.87	0.64	0.37	1.16	1.35	1.32	1.15	2.05	1.91	1.85	1.81	0.99	0.4	0.69	1.24	1.22	0.98	3.34	0.8	0.6	1.14		Cad99C	2.00667	1.66167	0.82	1.68167	1.14		Cad99C	2.44	0.00366598	-2.44	-1.59073	0.47054	0.000723132
CadN	0.28	0.19	0.17	0.39	0.82	0.54	0.36	0.35	0.85	0.75	0.29	0.15	0.19	0.48	0.25	0.46	0.52	0.94	0.25	0.23	0.6	0.51	0.32	0.82	0.23	0.29	0.45	0.73	0.49	0.22	0.14	0.28	0.27	0.17		CadN	0.398333	0.458333	0.473333	0.455	0.327		CadN	0.32	0.476535	-0.32	-0.47299	0.416455	0.25606
CadN2	0.35	0.81	0.42	0.32	0.56	0.44	0.24	0.78	0.74	0.77	0.46	0.23	1.04	1.05	1.15	1.14	0.82	0.51	0.39	1.01	0.46	0.32	0.25	0.54	0.99	0.62	1.25	1.53	1.71	0.53	0.56	0.84	0.95	0.67		CadN2	0.483333	0.536667	0.951667	0.495	0.965		CadN2	0.15	0.702804	0.15	0.260435	0.358812	0.467947
Cadps	0.44	1.23	0.46	0.46	1.7	0.93	0.62	0.58	1.13	1.44	0.55	0.93	1.23	1.97	2.78	2.64	1.66	1.92	1	0.68	1.23	0.58	0.81	1.57	1.32	1.6	2.53	2.18	2.68	0.43	0.7	1.83	0.95	1.5		Cadps	0.87	0.875	2.03333	0.978333	1.572		Cadps	1.2	0.0624914	1.2	0.623545	0.268118	0.0200378
Caf1-55	5.73	12.16	12.14	7.1	28.94	11.1	12.5	10.24	27.6	7.93	9.16	6.04	14.03	22.28	34.63	22.55	16.95	15.71	17.97	6.76	8.22	8.41	16.95	23.22	27.69	25.18	26.17	29.47	24.7	13.52	19.8	19.87	28.34	29.68		Caf1-55	12.8617	12.245	21.025	13.5883	24.442		Caf1-55	0.19	0.652577	0.19	0.253122	0.309761	0.413841
Caf1-105	3.56	5.81	4.72	4.01	8.09	5.92	4.81	2.27	7.61	4.74	6.13	3.55	7.33	7.19	5.62	8.94	7.92	6.92	5.41	3.8	2.39	4.67	4	4.72	6.52	5.61	5.82	7.86	7.23	6.09	3.89	7.62	7.91	3.93		Caf1-105	5.35167	4.85167	7.32	4.165	6.248		Caf1-105	0.06	0.87296	0.06	0.0737479	0.197449	0.708773
Caf1-180	22.04	24.73	26.09	20.41	35.37	37.47	22.8	12.59	27.35	28.16	30.78	21.76	40.47	33.13	44.31	42.51	34.28	32.95	38.13	14.76	25.57	23.26	12.66	34.32	37.07	26.71	40.9	39.15	53.31	23.72	20.2	39.97	30.47	29.17		Caf1-180	27.685	23.9067	37.9417	24.7833	34.067		Caf1-180	0.16	0.688424	0.16	0.130007	0.172539	0.451154
cag	5.46	7.37	7.14	3.64	7.55	5.67	7.08	3.95	10.15	8.23	8.38	5.06	20.99	17.51	19.55	20.44	15.51	17.74	7.33	6.25	3.82	5.06	4.17	9.14	19.22	20.47	19.78	21.86	18.45	10.55	10.11	18.82	19.82	15.79		cag	6.13833	7.14167	18.6233	5.96167	17.487		cag	4.83	1.47261e-05	4.83	0.844953	0.174878	1.35384e-06
CAH1	29.62	43.89	22.8	30.07	10.79	12.71	12.71	32.17	8.97	15.33	18.8	61.19	5.43	2.22	2.26	1.45	2.43	3.35	20.68	46.21	28.52	19.4	26.17	8.91	5.2	0.94	1.9	1.55	1.62	29.07	24.47	4.16	3.99	14.34		CAH1	24.98	24.8617	2.85667	24.9817	8.724		CAH1	9.02	9.56477e-10	-9.02	-3.60156	0.541956	3.0221e-11
CAH2	12.95	42.51	18.95	10.34	37.97	17.71	12.45	19.17	61.33	42.99	18.39	34.09	9.34	23.32	28.69	28.38	14.93	19.72	25.09	33.91	26.05	9.23	8.97	13.39	11.35	49.27	36.6	46.37	43.7	4.84	11.41	22.08	2.88	11.61		CAH2	23.405	31.4033	20.73	19.44	24.011		CAH2	2.22	0.00601988	-2.22	-1.13516	0.352624	0.00128562
CAHbeta	14.19	7.9	7.34	8.51	8.5	10.46	8.27	7.07	13.3	7.47	14.3	7.19	14.12	26.18	28.28	29.19	28.28	29.65	9.95	10.71	7.55	7.15	6.01	9.39	17.35	23.5	17.57	14.74	17.92	9.71	7.52	15.89	8.29	12.86		CAHbeta	9.48333	9.6	25.95	8.46	14.535		CAHbeta	6.09	8.14632e-07	6.09	0.879076	0.161436	5.16998e-08
caix	15.39	18.41	21.87	26.11	3.77	8.68	14.64	7.67	2.3	2.26	3.62	22.8	0.52	0	0.05	0	0.4	2.27	11.29	11.2	5.07	12.19	11.64	5.24	1.11	0.21	0.3	0.28	0.22	17.72	19.26	0.37	0	6.25		caix	15.705	8.88167	0.54	9.43833	4.572		caix	3.83	0.000147178	-3.83	-4.05406	0.946313	1.83511e-05
cal1	66.45	95.34	110.46	84.82	86.16	51.26	84.06	71.01	51.24	94.63	62.65	126.13	150.41	176.38	236.15	232.96	206.71	271.23	122.89	68.89	84.06	56.49	73.65	195.96	216.64	278.16	324.67	304.82	323.86	135.48	178.1	325.47	162.48	256.71		cal1	82.415	81.62	212.307	100.323	250.639		cal1	1.39	0.0410286	1.39	0.719755	0.287065	0.0121661
CalpA	9.09	10.47	9.2	7.13	9	6.96	9.26	6.21	8.46	8.34	7.67	8.76	31.9	25.76	29.71	28.83	29.95	33	9.37	6.7	6.15	8.54	5.84	24.72	34.39	47.59	46.15	41.37	38.65	17.14	22.93	41.25	32.63	31.77		CalpA	8.64167	8.11667	29.8583	10.22	35.387		CalpA	12.14	7.22841e-13	12.14	1.29986	0.168843	1.37525e-14
CalpB	4.71	6.46	8.21	2.89	6.46	6.27	7.11	4.99	9.26	5.09	8.33	5.29	10.99	6.26	5.38	5.21	7.88	6.44	10.47	6.64	5.37	4.42	4.45	5.49	12.39	8.66	5.99	8.91	6.53	6.37	5.34	12.66	10.6	9.79		CalpB	5.83333	6.67833	7.02667	6.14	8.724		CalpB	0.65	0.224153	-0.65	-0.428822	0.257453	0.0957872
CalpC	1.95	1.64	1.54	1.79	2.71	2.27	1.86	1.18	1.97	2.93	1.39	2.34	2.55	1.81	1.19	2.39	1.95	2.81	1.9	1.5	3.04	1.87	0.95	3.08	2.33	1.52	1.66	1.06	1.83	1.01	1.32	2.72	0.82	2.13		CalpC	1.98333	1.945	2.11667	2.05667	1.64		CalpC	0.48	0.333669	-0.48	-0.446477	0.31695	0.158933
Calr	314.6	543.44	477.46	384.54	391.84	472.03	350.05	400.48	461.7	388.72	426.91	361.37	742.68	581.77	782.22	663.94	571.94	617.88	569.91	368.55	369.24	403.25	383.22	507.21	831.85	722.16	799.33	676.55	931.65	587.7	431.41	809.44	610.95	612.58		Calr	430.652	398.205	660.072	433.563	701.362		Calr	0.28	0.523902	0.28	0.163527	0.155649	0.293438
Cals	8.76	14.26	12.76	10.96	16.05	14.51	10.79	8.42	12.89	13.4	13.59	13.35	13.43	23.78	29.64	29.01	21.73	24.89	12.93	9.79	13.11	11.28	9.95	17.25	15.89	22.78	28.63	22.58	26.49	9.99	13.23	23.36	9.95	15.47		Cals	12.8833	12.0733	23.7467	12.385	18.837		Cals	1.24	0.0578621	1.24	0.380369	0.161134	0.0182468
Calx	1.99	1	0.58	2.34	0.58	0.71	1.04	1.92	1.36	0.43	2.21	0.32	0.87	1.31	1.1	1.04	1.22	1.12	0.35	3.32	2.17	2.46	2.01	0.62	0.72	0.8	0.85	0.87	1.02	2.29	1.97	0.58	0.47	1.62		Calx	1.2	1.21333	1.11	1.82167	1.119		Calx	0.66	0.22005	-0.66	-0.684898	0.408646	0.0937346
calypso	3.21	5.34	5.42	5.64	7.82	5.8	4.16	3.97	7.14	4.62	5.32	3.94	3.57	8.58	6.89	6.83	5.16	7.14	6.54	4.1	2.96	5	4.39	4.61	5.34	8.89	6.29	5.49	5.41	4.1	4.41	5.78	3.07	3.35		calypso	5.53833	4.85833	6.36167	4.6	5.213		calypso	0.27	0.532761	-0.27	-0.171082	0.165214	0.300427
Cam	171.26	188.9	163.15	185.98	179.85	189.72	143.77	160.4	170.06	182.48	175.72	131.65	639.6	520.78	706.68	716.26	610.17	598.88	159.92	163.92	139.61	167.21	154.83	501.01	567.35	680.19	992.96	759.38	834.08	373.47	361.52	841.11	516.77	620.11		Cam	179.81	160.68	632.062	214.417	654.694		Cam	19.87	1.33632e-20	19.87	1.39846	0.142759	1.17134e-22
CaMKI	7.54	6.54	6.99	5.92	8.87	6.06	5.8	6.09	13.87	7.65	7.88	8.52	8.9	17.57	10.48	9.92	16.87	9.92	7.41	9.06	4.81	7.44	5.73	9.41	6.88	13.1	11.51	11.5	12.15	6.73	8.26	11.02	6.98	10.6		CaMKI	6.98667	8.30167	12.2767	7.31	9.873		CaMKI	0.01	0.973203	0.01	0.0177836	0.217087	0.934711
CaMKII	12.88	12.34	14.15	12.87	17.72	15.62	11.45	9.06	11.43	13.12	15.88	13.61	14.44	16.12	19.07	20.53	17.17	14.54	13.81	8.51	10.76	12.55	7.86	15.72	12.9	10.61	18.72	18.84	19.29	12.33	11.84	18.5	10.7	10.83		CaMKII	14.2633	12.425	16.9783	11.535	14.456		CaMKII	0.21	0.612275	-0.21	-0.131135	0.147332	0.373431
Camta	1.05	0.78	0.66	0.83	1.13	0.94	0.57	0.55	1.4	1.01	1.09	0.51	1.03	1.65	1.65	1.62	1.54	1.56	1.17	0.6	0.75	0.87	0.76	1.26	1.47	0.86	2.03	2.18	2.18	0.81	0.78	1.38	1.97	0.91		Camta	0.898333	0.855	1.50833	0.901667	1.457		Camta	0.73	0.187351	0.73	0.301168	0.169849	0.0762032
can	0.54	0.21	0.25	0.64	3.12	0.24	0.13	0	2.79	0.21	0.18	0	0.07	0.63	0.19	0.48	2.33	1.16	0.31	0.92	0.05	0	0	0.06	0.83	0	0	3.17	0	0.94	1.12	1.48	0	0.38		can	0.833333	0.551667	0.81	0.223333	0.792		can	0.03	0.92875	0.03	0.227129	0.986087	0.817832
cana	3.96	4.25	1.84	4.3	5.35	3.36	2.68	4.44	9.12	2.8	4.2	2.01	2.54	5.13	2.51	3.38	4.45	3.77	2.97	4.92	3.03	5.07	4.13	2.46	3.04	0.96	1.31	4.24	3.64	4.79	4.22	4.07	2.73	5.45		cana	3.84333	4.20833	3.63	3.76333	3.445		cana	1.23	0.0587047	-1.23	-0.717371	0.304755	0.0185763
CanA-14F	3.81	4.72	4.56	4.53	8.51	7.17	3.64	3.61	4.76	7.31	4.45	5.16	9.54	10.53	14.38	12.22	12.22	12.95	6.41	3.68	5.55	5	3.64	11.58	9.01	9.72	14.75	12.89	15.54	5.26	6.14	11.68	6.51	7.58		CanA-14F	5.55	4.82167	11.9733	5.97667	9.908		CanA-14F	3.04	0.000917771	3.04	0.72189	0.190297	0.000148545
CanA1	11.68	7.95	16.87	14.94	7.85	8.34	15.82	4.76	2.84	6.3	6.61	11.84	1.51	0.5	0.37	0.5	0.41	1.43	10.64	4.42	7.66	8.79	4.83	6.95	1.99	0.51	0.33	0.45	0.12	5.12	10.34	1.09	0.65	3.69		CanA1	11.2717	8.02833	0.786667	7.215	2.429		CanA1	9.97	1.06661e-10	-9.97	-3.78204	0.541255	2.79753e-12
CanB	0.82	0.41	0.57	3.06	4.82	5.64	2.49	1.7	1.16	4.18	1.12	0.4	0.61	2.08	1.42	0.96	1.4	2.51	0.19	0.76	3.04	3.69	1.19	4.22	2.2	0.53	1.56	4.29	1.88	2	0.81	0.51	1.66	0.63		CanB	2.55333	1.84167	1.49667	2.18167	1.607		CanB	0.67	0.214044	-0.67	-0.874479	0.516333	0.0903347
CanB2	18.39	22.71	21.36	14.69	34.15	23.54	20.72	16.06	28.49	21.87	27.62	18.85	30.02	59.08	77.68	71.32	52.58	54.96	28.28	19.91	19.31	15.95	16.45	31.05	30.87	66.47	62.47	49.54	64.21	23.1	23.9	38.99	29.48	37.37		CanB2	22.4733	22.2683	57.6067	21.825	42.64		CanB2	5.5	3.18737e-06	5.5	0.794712	0.153894	2.41701e-07
Cand1	5.27	5.45	5.28	5.67	10.91	5.93	5.92	4.5	11.01	6.25	7.71	5.65	5.74	10.83	10.06	8.23	10.75	11.41	7.29	5.78	5.12	5.2	5.86	6.71	7.92	12.3	7.94	7.93	10.04	6.37	5.79	11.97	2.62	7.77		Cand1	6.41833	6.84	9.50333	5.99333	8.065		Cand1	0.07	0.84172	-0.07	-0.0671655	0.150129	0.654598
CAP	12.46	11.06	13.17	16.83	9.31	13.98	12.04	8.92	4.98	12.52	8.82	14.84	13.06	16.92	23.77	21.87	21.81	25.66	12.86	9.3	10.12	13.15	11.86	28.42	13.23	27.67	36.76	33.68	31.39	13.99	22.3	33.64	13.18	27.54		CAP	12.8017	10.3533	20.515	14.285	25.338		CAP	0.28	0.526005	0.28	0.323577	0.308994	0.295009
Cap-D2	1.56	2.94	1.94	0.95	3.6	2.42	2.29	1.69	2.43	2.86	2.7	1.46	2.72	3.23	2.71	3.39	2.79	3.08	3.63	1.58	1.93	1.47	1	2.37	2.63	3.1	3.05	4.2	3.99	0.68	1.2	4.27	1.16	1.75		Cap-D2	2.235	2.23833	2.98667	1.99667	2.603		Cap-D2	0.22	0.597507	-0.22	-0.145438	0.158393	0.358507
Cap-D3	4.72	6.18	5.13	4.17	4.64	5.23	4.16	2.48	5.72	4.36	6.65	3.84	4.1	6.79	7.59	7.48	6.24	6.34	5.53	3.73	3.2	3.5	3.06	3.78	5.71	6.52	6.69	6.58	6.26	3.49	3.66	6.41	3.69	4.82		Cap-D3	5.01167	4.535	6.42333	3.8	5.383		Cap-D3	0.04	0.901853	-0.04	-0.044221	0.146919	0.763423
Cap-G	3.36	5.95	4.97	2.6	6.1	5.05	3.29	2.79	5.82	5.23	5.45	4.42	5.72	8.01	9.29	7.87	5.35	7.29	6.34	3.33	3.82	2.85	2.64	4.51	6.72	6.67	6.76	5.43	8.02	3.36	2.91	7.64	5.44	6.04		Cap-G	4.67167	4.5	7.255	3.915	5.899		Cap-G	0.2	0.625951	0.2	0.136775	0.158464	0.388067
Cap-H2	2.09	3.57	2.82	1.94	3.91	2.66	2.92	1.33	4.71	2.04	3.25	1.77	2.96	4.07	4.11	4.45	2.88	3.55	3.28	1.33	1.95	2.53	2.16	1.84	3.54	3.08	3.58	3.81	4.91	2.3	2.51	3.16	3.63	2.75		Cap-H2	2.83167	2.67	3.67	2.18167	3.327		Cap-H2	0.04	0.911498	-0.04	-0.0580329	0.211504	0.783791
Capa	0	0	0	0.75	3.03	2.06	0.32	1.54	0	1.68	0.17	0	0	0	0	0	0	0.62	0	0	2.45	0.52	0.63	1.85	0.33	0	0	0	0	0	0	0	0	0		Capa	0.973333	0.618333	0.103333	0.908333	0.033		Capa	0.65	0.224866	-0.65	-2.13572	1.28394	0.0962294
CapaR	0.9	0.68	0.05	0.54	0.37	0.34	0.27	1.57	0.04	0.46	0.36	0.37	0	0	0	0	0.22	0	0	0.28	0	0.22	0.15	0	0.32	0	0	0	0	1.03	0.54	0	0	0.38		CapaR	0.48	0.511667	0.0366667	0.108333	0.227		CapaR	2.49	0.00323403	-2.49	-3.60033	1.0526	0.000625255
Caper	20.51	23.15	22.06	19.15	33.99	23.12	22.53	20.93	30.12	27.71	27.67	18.26	26.8	40.31	43.28	39.77	36.18	30.42	24.19	19.56	22.08	19.62	16.66	28.77	26.87	24.27	33.5	35.02	38.65	22.08	22.39	31.95	26.57	26.2		Caper	23.6633	24.5367	36.1267	21.8133	28.75		Caper	0.01	0.969406	-0.01	-0.0091739	0.0997533	0.926725
Capr	15.85	22.71	19.53	14.03	34.04	23.64	17.27	14.62	32.39	21.26	22.16	16.74	23.64	36.22	41.88	39.86	38.39	35.91	25.45	16.44	17.83	16.39	14.63	23.97	29.96	32.72	41.41	39.06	43.03	20.86	16.87	34.06	34.52	24.16		Capr	21.6333	20.74	35.9833	19.1183	31.665		Capr	1.25	0.0566114	1.25	0.24612	0.103826	0.0177639
caps	1.57	1.63	1.38	1.87	2.53	1.89	1.46	1.7	1.64	1.95	1.85	1.47	1.3	1.49	0.72	0.66	1.28	1.4	1.35	2.3	1.47	1.63	1.31	1.87	1.27	0.53	0.96	1.63	1.12	1.4	1.5	0.84	1.08	1.17		caps	1.81167	1.67833	1.14167	1.655	1.15		caps	3.78	0.000164974	-3.78	-1.10997	0.260855	2.08951e-05
capt	15.31	24.33	19.35	13.16	25.78	15.77	19.43	23.32	28.85	17.76	20.67	15.37	52.04	77.66	103.57	79.57	68.12	51.52	29.49	21.71	17.87	18.26	24.9	52.18	63.88	104.83	96.54	90.91	79.69	39.19	44.92	84.42	63.96	70.25		capt	18.95	20.9	72.08	27.4017	73.859		capt	8.32	4.83327e-09	8.32	1.19447	0.18727	1.78986e-10
capu	1.72	2.63	1.73	1.53	3	2.56	1.18	2.59	4.43	2.52	2.15	2.15	11.97	19.07	28.57	23.51	22.39	23.52	3.29	4.04	2.07	1.82	1.65	18.99	12.12	24.69	32	28.77	31.71	7.25	10.23	28.81	11.74	20.17		capu	2.195	2.50333	21.505	5.31	20.749		capu	21.71	1.93756e-22	21.71	2.51457	0.245879	1.50311e-24
car	5.79	9.26	7.84	5.64	8.51	6.82	5.85	8.05	10.09	9.17	9.01	8.45	13.96	19.65	25.75	19.65	17.97	14.53	10.86	9.49	7.52	6.51	5.97	6.88	13.24	21.18	20.61	25.38	23.88	7.73	5.54	16.01	11.59	12.84		car	7.31	8.43667	18.585	7.87167	15.8		car	2.46	0.00346452	2.46	0.556386	0.163732	0.00067845
CarT	0.23	0.29	0.3	0.05	0.09	0.35	0.07	0.12	0.25	0.17	0.37	0.04	0	0.1	0.29	0.11	0.46	0.54	0.36	0.47	0.09	0.27	0	0.23	0.66	0	0.46	0.51	0.07	0.1	0.82	0.82	0	0		CarT	0.218333	0.17	0.25	0.236667	0.344		CarT	0.01	0.97079	0.01	0.060448	0.682001	0.929373
cas	0.78	0.15	0.16	0.53	1	0.49	0.28	0.19	0.47	0.1	0.27	0.17	0	2.57	0.92	0.66	1.46	1.01	0	0.18	0.38	0.48	0.35	1.54	0.89	0.49	2.43	3.3	3.59	0.63	0.15	0.77	1.78	1.01		cas	0.518333	0.246667	1.10333	0.488333	1.504		cas	1.3	0.0503637	1.3	1.49604	0.617616	0.0154236
CASK	1.47	1.65	1.59	1.52	2.87	2.59	1.36	1.45	1.8	2.69	2.23	1.46	2.93	3.67	4.97	4.49	3.42	3.17	2.06	1.48	2.47	2.02	1.59	3.44	2.86	3.15	4.05	4.8	5.42	1.87	2.08	3.89	2.85	2.64		CASK	1.94833	1.83167	3.775	2.17667	3.361		CASK	1.48	0.0328085	1.48	0.469612	0.1806	0.00931457
casp	9.03	10.24	13.08	7.13	18.7	12.69	12.11	9.16	17.04	8.78	12.93	7.53	14.28	20.31	24.2	20.87	21.05	20.55	12.94	11.61	9.8	10.58	7.45	12.76	15.23	15.73	15.05	19.1	22.83	12.71	10.39	17.39	13.48	10.88		casp	11.8117	11.2583	20.21	10.8567	15.279		casp	1.08	0.082271	1.08	0.291001	0.132262	0.0277945
Cat	19.13	19.17	11.33	20.34	33.65	18.67	23.75	43.88	49.82	22.05	14.07	17.74	10.38	53.95	40.7	29.84	33.74	17.48	17.78	30.44	21.88	19.33	39.78	18.94	13.79	37.32	21.86	22.04	19.32	27.12	19.33	12.1	7.19	36.66		Cat	20.3817	28.5517	31.015	24.6917	21.673		Cat	0.37	0.4271	-0.37	-0.495812	0.405749	0.221719
cathD	13.17	25.36	15.33	10.1	31.97	13.51	13.51	17.39	43.99	17.8	18.6	18.16	25.85	131	115.68	107.48	72.54	71.42	30.85	23.75	20.72	12.59	15.99	23.85	35.22	111.37	85.89	67.3	85.4	22.88	22.36	54.39	22.87	38.64		cathD	18.24	21.575	87.3283	21.2917	54.632		cathD	4.16	6.93381e-05	4.16	1.43718	0.321403	7.76443e-06
cato	0	0	0	0	0	0	0	0	0	0	0	0	0	0.44	0	0	0	0.24	0	0	0	0	0	0	0	0	0	0	0	0	0	0	0	0		cato	0	0	0.113333	0	0		cato	0	NA	0	0.58999	1.34851	0.66174
Catsup	74.85	104.88	94.66	62.74	83.17	83.97	71.06	90.01	116.33	93.73	102.77	80.9	96.55	110.02	111.74	129.89	110.44	93.03	110.04	82.61	84.77	64.49	87.46	88.23	116.99	113.85	128.82	106.4	115.16	83.36	64.65	126.72	76.15	100.97		Catsup	84.045	92.4667	108.612	86.2667	103.307		Catsup	1.96	0.0109625	-1.96	-0.335809	0.111367	0.00256688
caup	1.22	0.54	1.05	1.66	2.17	2.55	1.59	1.16	0.5	2.52	0.75	0.74	0.71	1.08	0.49	0.54	0.5	1.08	0.41	0.2	1.46	1.45	1.4	2.46	0.89	0.27	0.62	0.98	1.7	0.49	0.45	0.31	1.6	0.29		caup	1.53167	1.21	0.733333	1.23	0.76		caup	1.89	0.0129908	-1.89	-1.30372	0.441508	0.00314815
cav	3.19	4.1	2.8	2.79	7.38	3.99	3.34	2.38	8.69	3.72	3.66	2.96	4.23	8.26	9.42	6.99	5.66	3.55	6.23	2.62	2.41	3.29	2.6	4.06	4.81	4.85	4.67	6.39	4.45	2.6	2.54	6.72	1.07	2.74		cav	4.04167	4.125	6.35167	3.535	4.084		cav	0.06	0.875552	0.06	0.103512	0.281736	0.713316
caz	9.43	8.06	12.19	8.01	14.27	13.55	9.5	5.47	14.33	12.63	12.57	9.12	15.04	15.37	20.35	19.43	19.01	15.63	13.74	6.05	9.67	10.19	7.35	16.19	14.66	14.15	23.36	25.49	29.87	9.28	12.28	23.79	21.04	16.17		caz	10.9183	10.6033	17.4717	10.5317	19.009		caz	0.4	0.401298	0.4	0.183125	0.144093	0.203771
cbc	3.93	1.64	2.6	2.4	4.69	2.47	3.1	3.2	6.38	2.2	1.71	2.92	3.3	5.56	3.35	5.23	2.83	3.41	1.99	2.23	1.85	2.48	1.76	1.9	4.8	3.93	3.5	3.22	3.66	2.56	3.35	3.05	4.65	3.82		cbc	2.955	3.25167	3.94667	2.035	3.654		cbc	0.21	0.616649	-0.21	-0.276729	0.314948	0.379592
Cbl	7.05	6.88	8.09	7.21	10.91	9.09	7.25	7.32	8.39	10.01	8.76	6.69	10.66	11.28	12.79	13.27	12.44	11.86	11.73	7.14	7.58	7.95	6.09	11.49	10.02	9.54	12.54	14.07	15.45	8.41	7.87	10.57	16.48	11.48		Cbl	8.205	8.07	12.05	8.66333	11.643		Cbl	0	0.992478	0	0.0027752	0.116625	0.981015
CBP	1.81	1.7	3.28	2.12	3.44	2.81	2.65	2.23	0.74	3.3	2.45	2.5	0.8	1.18	1.2	1.05	0.51	2.13	2.29	1.08	2.42	3.03	1.62	3.23	1.36	0.43	0.28	0.21	0.46	1.56	1.99	0.65	0.68	0.85		CBP	2.52667	2.31167	1.145	2.27833	0.847		CBP	3.08	0.000827869	-3.08	-1.61391	0.422196	0.000132025
Cbp20	44.05	43.9	44.7	42.45	58.43	59.81	32.47	24.82	58.69	41.42	44.11	33.34	60.02	45.14	55.79	53.47	56.83	63.53	41.81	40.45	35.89	41.61	24.41	35.85	45.43	58.3	36.37	48.02	46.56	34.85	28.74	42.28	33	40.85		Cbp20	48.89	39.1417	55.7967	36.67	41.44		Cbp20	0.02	0.965733	-0.02	-0.0159227	0.148774	0.914768
Cbp53E	3.02	2.05	0.87	2.72	2.24	2.73	1.76	1.13	1.34	1.66	2.31	0.44	0.74	0.71	0.82	0.5	0.94	0.75	0.24	2.79	2.57	2.7	1.58	2.29	0.6	0.19	0.7	1.18	0.73	2.24	0.86	0.57	1.32	1.56		Cbp53E	2.27167	1.44	0.743333	2.02833	0.995		Cbp53E	4.56	2.76281e-05	-4.56	-1.46472	0.312333	2.73709e-06
Cbp80	5.42	7.22	7.44	5.14	7.34	7.64	5.32	2.71	7.75	6.57	8.88	4.74	7.28	10.17	12.27	9.75	9.15	10.33	7.95	4.03	3.72	5.05	2.95	7.79	8.81	8.63	10.77	10.2	13.43	4.82	4.37	9.6	6.88	6.13		Cbp80	6.7	5.995	9.825	5.24833	8.364		Cbp80	0.28	0.530388	0.28	0.181592	0.174644	0.29844
cbs	8.84	12.91	12.2	8.56	12.55	11.59	7.97	8.04	19.77	9.86	14.6	8.88	13.08	21.56	19.61	21.07	15.3	20.03	12.68	10.71	10.25	8.49	8.94	11.99	17.96	22.82	22.6	27.41	18.31	11.18	9.54	20.55	12	10.42		cbs	11.1083	11.52	18.4417	10.51	17.279		Cbs	10.4	3.98232e-11	-10.4	-2.33313	0.327021	9.7143e-13
Cbs	17.11	9.5	9.77	14.76	7.86	20.2	14.91	10.38	7.34	15.53	9.2	5.64	3.56	2.44	2.75	2.53	2.61	4.48	11.52	10.29	10.92	14.51	10.45	9.77	5.27	2.95	2.23	5.13	1.86	4.78	10.78	5.29	3.11	5.4		Cbs	13.2	10.5	3.06167	11.2433	4.68		cbs	0.23	0.582243	0.23	0.152286	0.160968	0.344116
cbt	15.24	24.14	19.25	17.47	16.25	15.72	13.27	18.36	18.01	17.11	19.09	19.46	18.68	11.57	12.61	15.08	13.38	11.09	25.64	10.69	13.76	16.6	14.12	15.18	12.04	11.97	15.28	17.47	13.24	13.41	18.96	15.48	9.34	17.53		cbt	18.0117	17.55	13.735	15.9983	14.472		cbt	3.37	0.000422199	-3.37	-0.915778	0.228535	6.14493e-05
Cby	4.21	16.53	7.6	3.41	25.24	8.17	4.5	5.35	39.38	13.75	5.37	10.62	9.01	24.18	23.07	23.51	21.71	20.34	9.68	14.33	4.99	5.7	4.3	5.48	10.59	22.04	11.93	26.79	14.05	5.18	7.55	16.98	7.8	9.35		Cby	10.86	13.1617	20.3033	7.41333	13.226		Cby	0.05	0.89074	0.05	0.147966	0.44358	0.738703
Cc2d2a	0.02	0.15	0	0.04	0.06	0.06	0	0	0.22	0.03	0.11	0	0.05	0.08	0.02	0.1	0.09	0.03	0.06	0	0	0	0.12	0.04	0.09	0	0	0.04	0	0	0.09	0.1	0.06	0.02		Cc2d2a	0.055	0.06	0.0616667	0.0366667	0.04		Cc2d2a	0.03	0.924035	-0.03	-0.226389	0.933193	0.808318
CCAP	2.19	1.9	1.78	1.55	3.81	3.51	1.8	2.04	5.42	1.07	2.44	0.78	2.62	2.7	3.98	2.82	4.4	3.82	1.08	3.17	2.02	1.97	1.06	1.79	0.79	3.54	1.6	1.19	5.19	2.8	0.38	4.21	5.39	1.98		CCAP	2.45667	2.25833	3.39	1.84833	2.707		CCAP	0.04	0.919494	0.04	0.0929688	0.362858	0.797787
CCAP-R	0.31	0.04	0.14	0.23	0.17	0.15	0.08	0.04	0.14	0.07	0.15	0.04	0.23	0.67	0.29	0.17	0.47	0.19	0.06	0.08	0.17	0.07	0.1	0.27	0.35	0.12	0.87	0.98	0.98	0.27	0.04	0.27	0.79	0.08		CCAP-R	0.173333	0.0866667	0.336667	0.125	0.475		CCAP-R	2.51	0.00311876	2.51	1.42131	0.414098	0.000598449
CCDC53	147.78	199.94	309.71	120.27	200.14	242.64	162.48	121.07	330.23	196.82	355.21	174.53	427.19	237.69	243.07	257.16	364.98	355.39	236.24	265.99	230.59	161.84	111.18	200.52	412.83	310.57	328.2	312.79	396.06	223.36	158.64	389.38	357.9	218.72		CCDC53	203.413	223.39	314.247	201.06	310.845		CCDC53	0.01	0.973514	0.01	0.0208628	0.256781	0.935245
Ccdc56	35.24	32.62	28.53	39.48	34.09	43.56	34.46	21.46	33.55	27.99	31.56	23.28	21.4	29.62	31.94	28.95	32.91	35.77	24.38	26.41	23.98	28.71	21.32	26.27	33.85	23.33	26.64	26.8	27.71	23.16	26.34	36.08	19.27	25.56		Ccdc56	35.5867	28.7167	30.0983	25.1783	26.874		Ccdc56	3.38	0.00042091	-3.38	-0.502593	0.125384	6.11207e-05
CCDC151	0	0	0	0	0	0	0	0	0	0	0	0	0	0.04	0	0	0.03	0	0	0	0	0	0	0.08	0	0	0	0	0	0	0	0	0	0.04		CCDC151	0	0	0.0116667	0.0133333	0.004		CCDC151	0	NA	0	0.38191	1.34851	0.777017
CCHa1	0.88	0.63	0.51	0.67	0.47	0.29	0.85	0.23	0.26	0.15	0.82	0.03	0.66	0.36	0.78	0.43	0.96	0.55	0	1.21	0.17	0.46	0.51	0.45	0.58	0.67	0.78	1.44	0.32	0.73	0.5	0.27	2.39	1.21		CCHa1	0.575	0.39	0.623333	0.466667	0.889		CCHa1	0.03	0.934897	0.03	0.125874	0.586558	0.830081
CCHa1-R	0.35	0.1	0.2	0.22	0.06	0.16	0.04	0.1	0.01	0.01	0.07	0.03	0.18	0.45	0.3	0.14	0.29	0.08	0.03	0.06	0.03	0	0.02	0.1	0.17	0.08	0.52	0.22	0.66	0.27	0.09	0.08	0.5	0.1		CCHa1-R	0.181667	0.0433333	0.24	0.04	0.269		CCHa1-R	1.89	0.0129908	1.89	1.72375	0.583777	0.00314949
CCHa2	31.24	21.76	23.93	27	16.22	27.01	29.86	14.52	28.7	13.18	35.8	22.75	14.22	22.85	10.72	8.62	25.14	12.16	20.8	26.57	15.53	30.88	24.55	11.49	17.58	12.09	7.35	10.59	14.43	24.89	28.39	11.78	4.7	17.86		CCHa2	24.5267	24.135	15.6183	21.6367	14.966		CCHa2	2.72	0.00189537	-2.72	-1.15316	0.321759	0.000338454
CCHa2-R	0.07	0.03	0.04	0.06	0.2	0.11	0.02	0	0.32	0.04	0.02	0.02	0.01	0.3	0.01	0.1	0.43	0.19	0.01	0.06	0.07	0.03	0	0.01	0.04	0.03	0.16	0.27	0.1	0.11	0.03	0.11	0.27	0.05		CCHa2-R	0.085	0.07	0.173333	0.03	0.117		CCHa2-R	0.22	0.604527	0.22	0.821085	0.909134	0.366446
Cchl	104.94	109.06	75.55	110.08	82.09	115.75	82.32	50.17	74.4	65.87	89.97	59.45	60.2	54.71	62.23	56.97	58.88	81.32	63.3	64.81	53.59	96.63	59.33	58.24	72.36	48.03	43.1	52.52	64.47	63.56	70.17	76.24	46.25	49.78		Cchl	99.5783	70.3633	62.385	65.9833	58.648		Cchl	4.42	3.77508e-05	-4.42	-0.729079	0.157946	3.91187e-06
CCKLR-17D1	0.06	0.01	0.07	0.09	0.08	0.06	0.01	0.01	0.06	0	0.01	0.01	0.1	0.11	0.06	0.04	0.08	0.02	0.01	0.01	0.02	0.02	0	0.07	0.09	0	0.08	0.17	0.11	0	0	0.02	0.05	0		CCKLR-17D1	0.0616667	0.0166667	0.0683333	0.0216667	0.052		CCKLR-17D1	1.2	0.0637436	1.2	1.71863	0.741701	0.0204957
CCKLR-17D3	0.35	0.08	0.23	0.41	0.31	0.23	0.1	0.01	0.38	0.1	0.19	0.1	0.12	1.14	0.66	0.2	0.92	0.23	0.13	0.13	0.14	0.01	0.05	0.45	0.57	0.41	1.73	1.87	1.3	0.31	0.12	0.21	1.87	0.13		CCKLR-17D3	0.268333	0.146667	0.545	0.151667	0.852		CCKLR-17D3	1.08	0.0830289	1.08	1.35123	0.615504	0.0281408
Ccm3	18.13	23.07	16.95	12.55	25.1	18	15.45	17.83	20.67	16.03	22.65	14.13	15.84	25.21	24.01	22.97	26.05	25.18	18.68	24.36	12.24	20.61	16.53	14.68	20.42	20.19	24.51	23.82	24.81	17.39	16.45	27.21	18.89	17.74		Ccm3	18.9667	17.7933	23.21	17.85	21.143		Ccm3	0.6	0.2536	-0.6	-0.189327	0.119125	0.111989
Ccn	0.28	0.24	0.2	0.24	0.57	0.24	0.22	0.12	0.45	0.23	0.2	0.23	0.15	0.53	0.73	0.73	0.41	0.35	0.24	0.16	0.21	0.21	0.23	0.35	0.24	0.5	0.65	0.84	0.69	0.14	0.17	0.33	0.41	0.14		Ccn	0.295	0.241667	0.483333	0.233333	0.411		Ccn	0.42	0.381277	0.42	0.425459	0.324694	0.190081
Ccp84Aa	3.63	0.56	13.28	22.21	12.53	44.03	37.83	0.9	1.65	5.71	5.31	0.96	0	0.76	0	0	0	25.13	5.49	16.47	12.52	66.27	2.84	24.45	1.98	1.05	0.59	0	0	1.65	19.56	0.48	0	11.53		Ccp84Aa	16.04	8.72667	4.315	21.34	3.684		Ccp84Aa	0	NA	0	-1.19773	1.22307	NA
Ccp84Ab	204.35	27.4	264.99	284.46	74.54	642.29	365.01	53.78	11.31	49.51	236.49	77.74	7.86	0	0	0	0.63	174.67	53.27	117.73	98.06	466.87	58.92	154.03	17.71	6.04	0	0.78	0.25	60.77	194.65	9.77	3.56	69.87		Ccp84Ab	249.672	132.307	30.5267	158.147	36.34		Ccp84Ab	0.52	0.305312	-0.52	-1.85562	1.26202	0.141464
Ccp84Ac	0	0	0	0.52	0	2.34	0.29	0.22	0	0.24	22.72	4.06	0	0	0	0	0	1.5	0.56	1.92	0.64	1.88	0.44	1.75	0.26	0.15	0	0	0	0	0.64	0	0	0.16		Ccp84Ac	0.476667	4.58833	0.25	1.19833	0.121		Ccp84Ac	1.22	0.0598595	-1.22	-2.99815	1.2784	0.019015
Ccp84Ad	15.86	5.32	20.42	59.84	27.67	140.94	110.4	29.74	13.64	39.8	871.36	88.38	4.5	0	1.16	0.21	0.18	95.7	16.95	41.06	24.89	95.93	45.83	55.1	10.22	1.94	0	0	0	3.96	122.33	4.97	0.41	14.52		Ccp84Ad	45.0083	192.22	16.9583	46.6267	15.835		Ccp84Ad	1.66	0.022129	-1.66	-3.07856	1.11784	0.00588673
Ccp84Ae	2.82	0.13	1.99	0.67	0	24.7	1.98	0	0.13	0.15	841.13	29.19	8.48	0	0	0	0	0	0	0.13	0.5	31.89	0.14	1.85	1.53	0.2	0	0	0	0.52	1.64	0.91	1.86	0		Ccp84Ae	5.05167	145.43	1.41333	5.75167	0.666		Ccp84Ae	0	NA	0	-2.33303	1.35857	NA
Ccp84Af	0.48	0	0.49	0.23	0	1.46	0	0	0.71	0.63	92.45	3.48	0	0	0	0	0	0	0	0.53	0.23	1.77	0	0	0	1.08	0	0	0	0	2.24	0	0	0		Ccp84Af	0.443333	16.2117	0	0.421667	0.332		Ccp84Af	0	NA	0	-4.34353	1.32802	NA
Ccp84Ag	151.83	77.07	49.08	54.29	14.32	53.97	40.04	22.72	6.72	4.59	1020.4	84.26	15.27	0	0.35	0.13	0.22	13.52	36	29.41	11.8	85.85	31.53	10.37	7.21	0.92	0.24	1.22	0	25.2	177.25	7.08	11.85	10.41		Ccp84Ag	66.76	196.455	4.915	34.16	24.138		Ccp84Ag	0	NA	0	-4.3136	1.11732	NA
Ccs	19.74	16.38	16.59	12.98	22.11	11.81	12.7	13.06	25.85	19.76	14.3	18.04	17.53	26.36	24.79	20.86	19.01	17.37	14.69	18.45	20.78	12.96	11.24	10.52	18.87	29.51	20.29	12.6	24.77	10.62	13.28	20.33	12.2	13.83		Ccs	16.6017	17.285	20.9867	14.7733	17.63		Ccs	0.57	0.269593	-0.57	-0.278277	0.179265	0.120586
CCT1	106.45	94.78	116.52	94.89	66.53	125.69	86.15	61.3	81.93	78.27	106.24	65.23	167.76	155.9	182.49	166.86	159.05	174.77	87.75	61.14	57.23	76.35	56.04	126.57	171.61	222.45	192.19	174.71	186.48	95.24	103.33	192.97	156.79	152.73		CCT1	100.81	79.8533	167.805	77.5133	164.85		CCT1	3.5	0.000316903	3.5	0.513545	0.125714	4.40702e-05
CCT2	140.13	148.87	189.98	132.77	160.74	178.36	151.78	78.72	132.86	122.64	196.01	110.81	279.2	229.11	324.97	310.31	302.41	343.86	150.09	105.27	88.88	126.98	90.44	248.94	334.81	304.19	331.78	305.68	342.89	170.39	200.34	383.51	256.88	256.27		CCT2	158.475	132.137	298.31	135.1	288.674		CCT2	2.69	0.00202736	2.69	0.62458	0.175298	0.000366708
CCT3	291	276.69	315.99	274.23	204.72	367.48	248.75	138.95	199.23	230.91	269.57	172.69	511.14	416.75	631.24	513.27	440.8	497.59	272.01	163.95	137.93	225.24	145.28	331.63	491.01	603.95	598.71	528.46	538.32	277.07	330.63	635.42	404.58	419.42		CCT3	288.352	210.017	501.798	212.673	482.757		CCT3	3.38	0.000421239	3.38	0.6959	0.173626	6.12238e-05
CCT4	174.06	199.62	206.88	159.8	159.88	202.41	140.61	95.75	144.13	139.5	172.66	121.28	308.42	273.83	375.54	336.74	334.73	375.19	162	126.11	101.34	131.48	92.31	228.26	321.27	388.6	384.66	364.24	321.39	164.2	189.37	416.77	306.91	266.95		CCT4	183.775	135.655	334.075	140.25	312.436		CCT4	7.52	3.04033e-08	7.52	0.739309	0.121934	1.33455e-09
CCT5	112.27	103.8	131.45	106.1	83.61	124.13	103.99	63.97	89.79	83.78	115.76	69.76	163.57	138.59	183.36	185.5	147.72	167.51	95.4	63.94	46.96	88.9	64.54	105.4	167.19	224.86	187.93	163.15	164.57	98.93	100.84	185.76	132.76	144.23		CCT5	110.227	87.8417	164.375	77.5233	157.022		CCT5	1.18	0.0656523	1.18	0.345664	0.150077	0.0212655
CCT6	123.43	142.73	150.34	131.44	133.69	154.22	123.58	83.39	117.06	108.38	137.55	90.31	208.59	182.49	246.32	220.03	179.16	237.74	146.07	76.91	76.05	105.86	77.27	142.27	242.34	259.95	263.35	237.7	238.13	117.68	127.48	254.35	164.23	190.76		CCT6	139.308	110.045	212.388	104.072	209.597		CCT6	1.7	0.0197967	1.7	0.388529	0.138932	0.0051654
CCT7	73.05	68.24	80.93	70.22	64.47	91.89	65.87	35.8	51.31	52.42	73.69	45.51	120.97	102.32	138.71	115.66	115.77	133.62	68.37	41.72	33.18	65.63	41.05	84.04	124.99	125.09	126.24	107.36	108.48	67.89	73.79	144.34	104.25	99.81		CCT7	74.8	54.1	121.175	55.665	108.224		CCT7	2.67	0.00212265	2.67	0.604054	0.170215	0.000387047
CCT8	234.65	288.15	286.45	229.06	218.36	321.02	172.28	110.03	191.64	213.83	206.63	171.13	361.23	305.9	463.25	397.29	402.19	396.28	239.46	187.6	124.49	184.01	120.24	318.08	359.56	371.3	390.8	294.72	331.53	194.7	284.99	534.06	292.15	317.85		CCT8	262.948	177.59	387.69	195.647	337.166		CCT8	3.21	0.000613842	3.21	0.566367	0.144997	9.38071e-05
CCY	0.53	0.35	0.25	0.41	0.83	0.17	0.17	0.4	4.35	0.21	0.32	0.06	1.42	1.52	0.25	1.15	1.03	0.4	0.46	1	0.2	0.53	0.26	0.14	0.87	0.19	0.79	3.17	0.47	1.06	0.56	0.84	1.15	1.31		CCY	0.423333	0.918333	0.961667	0.431667	1.041		CCY	0.03	0.930831	-0.03	-0.169765	0.75762	0.822698
Ccz1	17.16	17.96	14.56	12.54	18	18.23	11.11	11.31	15.97	14.91	13.67	13.37	15.11	29.79	30.27	26.92	25.63	25.39	19.36	17.03	11.9	14.46	10.9	16.25	18.73	30.09	22.98	22.62	20.17	16.45	12.2	27.34	25.06	15.75		Ccz1	16.4083	13.39	25.5183	14.9833	21.139		Ccz1	1.55	0.0281576	1.55	0.351205	0.132065	0.00782942
cd	0.1	0.19	0.16	0	0	0	0	0.12	0	0	0	0.04	0	0.05	0.1	0.11	0	0	0	0	0.05	0	0	0	0	0	0	0	0	0	0	0.13	0	0		cd	0.075	0.0266667	0.0433333	0.00833333	0.013		cd	0	NA	0	-0.0859583	1.28351	0.946605
CD98hc	17.26	22.11	23.83	19.28	26.37	21.89	24.52	18.4	29.65	22.25	23.9	17.31	50.62	58.73	59.37	60.35	61.39	76.85	32.88	21.12	17.45	22.65	21.74	45.91	67.75	78.35	63.99	50.12	69.95	37.57	39.36	75.22	48.76	56.25		CD98hc	21.79	22.6717	61.2183	26.9583	58.732		CD98hc	13.31	4.86418e-14	13.31	0.8715	0.108156	7.76709e-16
Cda4	3.94	6.15	5.62	4.34	5.67	3.38	3.87	4.07	4.65	5.83	4.51	6.5	3.43	14.95	21.21	19.54	7.1	6.99	6.39	3.68	4.87	4.31	3.64	6.57	4.54	11.21	15.39	16.25	19.35	3.71	6.26	7.98	3.81	5.72		Cda4	4.85	4.905	12.2033	4.91	9.422		Cda4	0.68	0.210717	0.68	0.649315	0.381177	0.0884847
Cda5	0.91	1.2	1.5	1.68	1.44	1.46	1.25	0.92	0.72	1.19	2.97	1.37	0.84	0.67	0.61	0.92	0.57	0.73	1.33	0.78	0.92	1.4	0.88	1.43	0.76	0.35	1.08	1.2	0.83	0.86	1.69	0.71	1.26	1.33		Cda5	1.365	1.40333	0.723333	1.12333	1.007		Cda5	4.34	4.56277e-05	-4.34	-1.481	0.323926	4.83033e-06
Cda9	14.55	1.79	0.43	14.06	2.53	41.85	25.87	18.58	2.93	40.58	2.35	0.21	0	0.67	0.5	0.18	0	30.78	0.2	0.37	34.15	12.71	17.09	47.86	4.78	0.56	0.43	0.58	0.87	0.32	0	0	0	0.09		Cda9	12.535	15.0867	5.355	18.73	0.763		Cda9	0.5	0.319135	-0.5	-1.6588	1.15224	0.149972
CDase	10.12	9.11	8.89	12.09	10.91	8.55	9.67	4.97	10.33	7.53	16.86	8.11	4.68	20.66	19.2	15.41	18.06	17.31	8.08	11.54	8.31	14.37	8.64	6.97	4.73	13.27	17.09	10.49	14.4	6.41	3.43	7.63	1.62	9.5		CDase	9.945	9.57833	15.8867	9.65167	8.857		CDase	0.1	0.799898	0.1	0.15985	0.297303	0.590806
Cdc2rk	23.45	28.09	21.35	20.73	24.7	23.98	16.84	20.35	26.63	21.23	18.73	18.97	32.51	21.79	21.11	25.84	23.31	28.93	21.15	16.92	20.44	23.6	16.64	21.38	32.14	31.97	25.3	16.96	18.15	22.5	21.3	25.47	14.72	21.51		Cdc2rk	23.7167	20.4583	25.5817	20.0217	23.002		Cdc2rk	0.33	0.465768	-0.33	-0.229504	0.198794	0.248302
Cdc5	2.89	3.24	3.26	2.58	3.78	3.22	1.93	3.38	5.57	3.54	3.27	1.92	5.33	7.07	5.08	5.11	4.76	5.35	4.92	2.26	2.64	2	2.75	3.55	4.88	7.56	5.16	6.53	5.36	1.83	2.01	4.2	3.48	3.4		Cdc5	3.16167	3.26833	5.45	3.02	4.441		Cdc5	0.22	0.608453	0.22	0.202575	0.225975	0.370014
Cdc6	4.25	3.68	4.78	4.15	5.05	5.29	3.9	1.77	3.4	5.04	3.62	4.38	3.35	4.14	4.67	5.1	3.65	3.26	4.44	2.92	3.92	3.69	2.41	2.8	4.33	3.79	3.33	2.89	4.84	2.29	3.05	3.43	2.97	1.68		Cdc6	4.53333	3.685	4.02833	3.36333	3.26		Cdc6	0.78	0.165333	-0.78	-0.449732	0.243856	0.0651466
Cdc7	4.88	4.25	5.25	3.95	8.07	5.94	6.34	3.49	8.22	4.32	6.25	2.55	4.85	8.39	6.38	6.49	8.45	7.78	7.23	4.61	3.64	5.13	4.03	4.61	6.44	5.02	6.06	7.93	7.46	4.33	4.02	7.61	4.14	4.41		Cdc7	5.39	5.195	7.05667	4.875	5.742		Cdc7	0.07	0.851328	-0.07	-0.0895737	0.20975	0.669343
cdc14	4.23	4.67	5.2	4.05	6.08	4.46	5.02	3.42	7.38	4.67	5.2	4.09	6.03	7.15	6.2	7.03	5.39	6.71	5.19	4.75	4.15	4.43	2.66	4.7	5.39	5.92	7.1	4.54	7.34	4.92	2.97	8.14	6.24	6.13		cdc14	4.78167	4.96333	6.41833	4.31333	5.869		cdc14	0.51	0.311028	-0.51	-0.172983	0.118706	0.145052
Cdc16	1.79	1.19	1.86	2.12	1.81	2.89	2.44	1.91	3.42	2.58	1.61	1.45	1.43	4.43	3.33	3.31	2.93	4.13	1.77	1.82	2.1	1.64	0.75	3.46	2.55	3.79	3.9	1.71	2.32	1.49	1.74	3.92	2.11	2.28		Cdc16	1.94333	2.235	3.26	1.92333	2.581		Cdc16	0.01	0.967954	-0.01	-0.0249765	0.250083	0.920445
Cdc23	2.9	6.01	5.12	1.92	7.87	4.87	2.99	3.08	14.18	5.49	5.76	4.1	6.09	10.32	11.82	10.26	10.53	9.12	5.99	5.89	5	2.84	3.72	4.12	7.37	7.56	7.77	9.96	12.74	3.37	3.57	7.94	5.43	6.45		Cdc23	4.78167	5.93333	9.69	4.59333	7.216		Cdc23	0.17	0.668834	0.17	0.22147	0.281399	0.431264
Cdc27	12.28	15.88	15.5	10.94	23.36	17.38	12.15	9.18	25.05	15.34	15.55	10.92	22.62	25.43	25.51	26.97	27.03	26.56	15.99	14.26	8.88	13.16	7.99	16.46	21.11	15.4	22.98	23.31	25.75	16.43	14.91	26.26	14.86	16.38		Cdc27	15.89	14.6983	25.6867	12.79	19.739		Cdc27	1.11	0.0782647	1.11	0.283748	0.127617	0.0261857
Cdc37	59.5	95.23	61.02	56.2	105.68	86.66	41.52	49.91	82.53	68.14	54.14	64.72	106.75	102.45	143.81	124.33	111.98	108.57	79.2	64.06	47.2	46.16	33.62	80.29	99.96	106.94	122.58	116.84	107.94	58.74	56.13	123.45	59.92	84.17		Cdc37	77.3817	60.16	116.315	58.4217	93.667		Cdc37	1.33	0.0472162	1.33	0.384753	0.156981	0.0142479
Cdc42	105.65	178.65	129.41	92.25	159.25	149	90.44	86.78	131.71	128.69	149.86	111.71	259.17	273.01	421.53	357.33	307.08	266.21	181.29	111.18	91.99	98.4	90.9	190.29	268.46	234.09	354.21	294.02	419.35	163.64	148.5	373.39	189.13	234.63		Cdc42	135.702	116.532	314.055	127.342	267.942		Cdc42	8.37	4.22251e-09	8.37	0.863721	0.13492	1.53627e-10
CDC45L	4.82	5.58	6.5	5.04	5.77	6.26	4.64	2.78	5.16	4.24	6.37	4.79	7.53	7.47	7.66	7.79	6.9	6.66	6.6	3.94	4.39	4.16	3.15	5.77	7.11	7.53	7.45	5.29	7.6	4.53	4.63	8.29	4.72	4.9		CDC45L	5.66167	4.66333	7.335	4.66833	6.205		CDC45L	0.11	0.767881	0.11	0.0966199	0.16035	0.546803
Cdep	1.45	1.72	1.57	1.57	2.15	1.76	1.59	1.57	2.54	1.59	1.71	1.4	2.83	4.37	4.38	4.56	3.77	2.77	2.02	1.38	1.71	1.57	1.72	2.15	2.46	3.19	4.64	4.4	4.61	1.85	1.81	3.38	2.96	3.13		Cdep	1.70333	1.73333	3.78	1.75833	3.243		Cdep	3.44	0.000362393	3.44	0.555048	0.137057	5.12674e-05
CdGAPr	1.32	1.24	1.59	1.07	2.04	1.42	1.14	1.29	2.05	2	1.55	1.27	1.28	2.72	2.68	3.23	2.49	2.55	1.85	1.15	1.21	1.23	1.22	1.82	1.7	3.33	2.87	4.15	4.59	1.55	1.46	2.77	1.09	2.15		CdGAPr	1.44667	1.55	2.49167	1.41333	2.566		CdGAPr	0.13	0.747487	0.13	0.109686	0.170471	0.519945
cdi	4.23	2.32	2.47	3.71	2.57	3.43	2.84	2.85	3.94	2.41	4.52	1.99	2.61	3.23	2.97	2.47	3.63	3.07	1.87	3.62	2.89	3.53	3.58	2.12	2.3	1.9	3.28	3.18	3.21	3.61	2.1	2.52	1.81	2.75		cdi	3.12167	3.09167	2.99667	2.935	2.666		cdi	2.83	0.00148527	-2.83	-0.586946	0.160603	0.000257553
cDIP	0.55	0.55	0.77	0.47	0.47	0.46	2.24	1.85	0.94	0.07	0.34	0.32	0.19	0.25	0	0.14	0.08	0	0.54	0.37	0.31	1.1	1.22	0.92	1.47	1.11	0.39	0	0.37	0.49	1.74	0.05	0	0.94		cDIP	0.545	0.96	0.11	0.743333	0.656		cDIP	2.85	0.00142148	-2.85	-3.1896	0.869577	0.000244463
Cdk1	27.04	41.65	36.61	25.04	44.51	39.2	25.18	20.84	60.06	37.15	38.78	20.9	48.45	47.92	48.66	49.23	40.84	49.21	36.32	37.76	34.59	28.02	18.31	34.83	46.72	43.52	41.43	41.91	37.05	29.73	21.28	47.27	29.34	44.42		Cdk1	35.675	33.8183	47.385	31.6383	38.267		Cdk1	0.01	0.98218	-0.01	-0.00982324	0.178662	0.956153
Cdk2	6.75	3.85	6.05	4.3	8.68	7.33	6.66	2.46	5.91	6.22	6.01	4.98	4.53	4.02	5.99	6.98	6.38	5.11	4.94	4.82	5.67	5.49	5.24	5.9	7.84	7.11	4.81	5.17	6.25	3.98	4.41	7.11	1.1	6.05		Cdk2	6.16	5.37333	5.50167	5.34333	5.383		Cdk2	1.3	0.0506008	-1.3	-0.52569	0.217227	0.0155203
CDK2AP1	15.36	21.07	19.74	13.96	20.69	19.59	16.74	11.66	18.9	20.85	18.27	19.1	25.99	26.55	28.48	35.79	27.67	30.63	23.26	14.35	14.49	12.95	10.83	20.82	30.12	29.42	32.6	32.77	34.91	18.55	15.99	31.62	22.03	21.67		CDK2AP1	18.4017	17.5867	29.185	16.1167	26.968		CDK2AP1	0.3	0.502025	0.3	0.158869	0.145781	0.275811
Cdk4	2.72	6.29	4.51	2.46	5.08	5.86	3.73	3.88	7.52	4.99	5.5	3.37	6.64	9.11	12.47	11.4	5.83	6.37	6.78	4.37	4.7	5.02	2.82	5.87	6.74	10.56	10.19	8.51	9.41	4.49	3.64	7.7	6.39	6.74		Cdk4	4.48667	4.83167	8.63667	4.92667	7.437		Cdk4	0.5	0.318521	0.5	0.291559	0.202327	0.149575
Cdk5	2.72	4.12	3.09	3.08	5.44	4.06	3.4	2.37	6.19	4.28	3.39	3.21	5.11	8.92	8.77	10.59	7.41	8.76	3.67	4.14	3.83	2.95	2.17	4.5	5.36	11	8.5	8.91	8.81	5.29	4.13	8.42	5.14	7.09		Cdk5	3.75167	3.80667	8.26	3.54333	7.265		Cdk5	2.17	0.00678138	2.17	0.557877	0.175467	0.0014759
Cdk5alpha	1.05	0.28	0.84	0.93	1.14	0.71	0.38	0.04	0.8	1.37	0.69	0.65	0.84	1.1	0.6	0.66	1.53	1.43	0.66	0.6	0.97	1.2	0.87	0.38	0.42	0.55	1.36	1.45	0.41	0.37	0.2	1.61	0.11	0.37		Cdk5alpha	0.825	0.655	1.02667	0.78	0.685		Cdk5alpha	0.04	0.915272	0.04	0.133171	0.501318	0.790516
Cdk7	7.97	7.45	11.53	4.22	8.7	10	10.67	4.44	12.51	7.39	16.51	4.47	5.03	7.29	6.77	8.15	12.3	12.12	6.99	7.7	5.9	8.27	5	7.42	12.17	11.2	5.92	10.32	11.03	7.42	6.69	14.83	2.35	9.8		Cdk7	8.31167	9.33167	8.61	6.88	9.173		Cdk7	0.95	0.112719	-0.95	-0.623443	0.304501	0.0406164
Cdk8	2.71	4.53	2.88	1.56	5.54	3.41	2.51	2.16	5.4	4.03	3.31	3.28	2.25	4.51	7.62	5.12	4.07	5.52	3.61	2.92	4.27	4.08	3.23	2.14	3.9	5.29	8.38	2.02	4.33	1.98	1.98	4.97	2.04	1.98		Cdk8	3.43833	3.44833	4.84833	3.375	3.687		Cdk8	0.03	0.926124	-0.03	-0.0582063	0.244561	0.811879
Cdk9	7.64	6.53	9.95	6.82	10.76	8.1	6.43	3.76	13.85	7.47	9.84	6.58	11.32	15.37	15.94	16.5	20.46	15.01	8.18	7.09	8.08	6.02	5.51	6.13	10.75	16.1	12.55	12.3	11.72	7.31	9.03	15.31	14.98	8.52		Cdk9	8.3	7.98833	15.7667	6.835	11.857		Cdk9	1.35	0.044822	1.35	0.459365	0.18583	0.0134372
Cdk12	9.65	10.9	9.65	7.44	13.21	11.95	7.85	6.69	13.17	9.26	11.38	8.23	11.93	16.05	17.99	14.3	15.93	15.54	11.73	9.25	7.91	8.65	6.81	10.33	17.52	14.03	14.74	16.84	19.68	10.44	9.45	18.74	11.99	10.82		Cdk12	10.4667	9.43	15.29	9.11333	14.425		Cdk12	0.76	0.171913	0.76	0.149038	0.0817705	0.0683588
Cdlc2	4.74	0.93	2.57	3.56	27.53	6.74	1.91	1.83	47.01	2.36	2.02	0	3.89	35.62	1.67	12.67	27.92	23.87	3.23	17.58	0.2	11.51	0	0.73	9.64	0	2.4	27.59	3.74	4.7	3.7	14.23	0	7.62		Cdlc2	7.67833	9.18833	17.6067	5.54167	7.362		Cdlc2	0.12	0.761214	0.12	0.564892	0.916865	0.537821
cdm	1.54	2.48	2.96	1.7	2.44	1.42	2.26	2.71	2.51	2.19	3.2	2.37	4.65	4.6	4.23	3.99	4.19	3.09	2.91	1.98	2.34	2.27	1.56	3.55	5.57	4.25	3.55	4.26	4.86	2.79	2.06	3.08	4.16	2.73		cdm	2.09	2.54	4.125	2.435	3.731		cdm	0.12	0.763729	0.12	0.118044	0.193464	0.541755
CdsA	4.05	5.26	5.3	2.9	10.65	4.93	5.21	5.72	10.04	4.53	4.17	2.9	6.06	11.84	13.23	10.85	11.05	8.63	7.44	6.36	4.21	4.2	4.38	7.43	8.8	7.46	10.1	12.99	11.52	6.72	6.7	10.98	6.04	9.91		CdsA	5.515	5.42833	10.2767	5.67	9.122		CdsA	0.52	0.302878	0.52	0.356387	0.241392	0.139842
Cec-Psi1	0	0	0	0	0	0	0	0	0	0	0	0	0	0	0	0	0	0	0	0	0	0	0	0	0	0	0	0	1.01	0	0	0	0	0		Cec-Psi1	0	0	0	0	0.101		Cec-Psi1	0	NA	0	NA	NA	NA
Cec2	0	0.95	0	0	0	0	0	0	0	0	0	0	0.99	1.3	0	0	0.6	1.41	0	0	0	0	0	4.48	1.23	5.01	0	5.2	0	35.06	0.6	6.59	0	0		Cec2	0.158333	0	0.716667	0.746667	5.369		Cec2	0	NA	0	1.48723	1.32959	0.263326
CecA1	0.26	3.72	0.79	3.28	3.67	0	0	5.21	3.67	1.67	0	0	54.87	23.02	16.11	63.16	32.34	34.2	0	5.11	0	3.53	1.84	355.78	55.08	57.56	22.9	704.55	137.72	27.05	107.4	24.7	63.99	80.57		CecA1	1.95333	1.75833	37.2833	61.0433	128.152		CecA1	3.44	0.000366187	3.44	3.40795	0.842111	5.18966e-05
CecA2	0.99	4.71	0	3.88	1.42	6.38	0	1.19	2.46	0.97	0.83	0.32	83.18	15.87	10.4	55.83	51.85	62.57	0	15.11	1.05	0	3.26	361.49	50.48	68.23	36.18	630.18	123.94	41.11	64.14	27.28	36.87	70.4		CecA2	2.89667	0.961667	46.6167	63.485	114.881		CecA2	11.37	4.2355e-12	11.37	4.84237	0.649537	8.97925e-14
CecB	0.85	0	0	1.81	1.22	0.32	0.22	2.03	0.23	3.32	0.47	0.54	51.86	18.41	20.64	21.06	32.43	27.63	0.52	12.45	0.6	0	1.77	90.06	26.94	23.83	35.93	129.09	111.68	63.46	17.2	38.46	61.04	50.77		CecB	0.7	1.135	28.6717	17.5667	55.84		CecB	7.94	1.15719e-08	7.94	3.86968	0.620999	4.6234e-10
CecC	2.93	7.79	2.08	12.49	12.26	69.81	1.66	18.6	9.69	17.92	6.54	3.16	734.56	275.72	409.61	418.46	179.42	246.13	4.39	65.1	11.76	1.24	7.26	332.84	316.19	789.25	668.84	996.82	692.66	250.99	250.2	288.84	328.98	333.38		CecC	17.8933	9.595	377.317	70.4317	491.615		CecC	13.3	4.96926e-14	13.3	4.53635	0.56323	8.0024e-16
ced-6	10.73	17.64	15.51	6.87	17.79	15.9	11.5	5.72	14.41	11.74	15.48	11.29	13.13	26.3	29.47	23.32	24.48	17.45	28.51	8.85	8.69	8.81	7.04	11.73	14.86	14.46	18.95	16.36	25.84	9.3	9.66	24.32	9.62	12.54		ced-6	14.0733	11.69	22.3583	12.2717	15.591		ced-6	0.87	0.133858	0.87	0.372928	0.190354	0.0500978
Ced-12	7.74	11.68	10.75	4.9	15.7	8.59	10.08	6.68	16.06	8.15	9.84	7.54	37.19	40.31	57.84	50.32	36.03	31.17	20.56	7.66	5.37	5.03	4.16	20.57	43.96	49.08	54.81	44.83	49.17	24.9	19.27	52.17	27.95	34.02		Ced-12	9.89333	9.725	42.1433	10.5583	40.016		Ced-12	15.95	1.12465e-16	15.95	1.56787	0.178153	1.36025e-18
Cen	3.79	3.26	2.83	2.27	3.66	1.88	2.96	3.08	3.09	2.03	3.54	2.74	5.1	5.44	5.77	7.59	5.43	5.83	3.14	2.48	2.08	1.95	2.76	3.92	5.66	6.43	6.18	4.29	4.51	3.98	4.97	5.5	4.04	4.52		Cen	2.94833	2.90667	5.86	2.72167	5.008		Cen	1.21	0.0611767	1.21	0.418089	0.179033	0.01953
CenB1A	3.18	2.83	3.81	2.1	4.11	3.22	2.44	2.52	4.35	3.27	4.1	2.77	6.03	6.99	7.76	6.27	8.09	9.04	4.27	2.97	2.68	2.27	2.16	5.34	7.36	8.03	9.09	9.06	7.26	4.75	4.22	8.31	8.38	5.13		CenB1A	3.20833	3.24167	7.36333	3.28167	7.159		CenB1A	5.15	7.11546e-06	5.15	0.631338	0.126458	5.96138e-07
CenG1A	9.2	2.3	2.28	9.22	2.32	13.16	13.58	12.37	21.63	16.73	6.58	1.61	3.21	2.79	1.87	1.69	3.01	2.05	1.54	18.9	14.24	9.47	10	3.65	7.13	1.19	2.09	2.18	2.65	7.7	2.04	1.5	1.75	6.91		CenG1A	6.41333	12.0833	2.43667	9.63333	3.514		CenG1A	7.47	3.35037e-08	-7.47	-2.73247	0.452052	1.49796e-09
Cenp-C	4.11	8.63	9.11	4.02	10.73	8.46	4.45	5.94	11.39	7.8	9.15	5.33	8.95	12.44	12.61	14.14	10.98	10.05	9.84	5.01	5.99	5.19	3.12	6.23	9.4	11.59	13.21	11.5	12.63	6.11	5.46	15.25	3.53	6.37		Cenp-C	7.51	7.34333	11.5283	5.89667	9.505		Cenp-C	0.16	0.686491	0.16	0.114795	0.151665	0.449109
Cep89	0.83	0.93	0.59	1.96	3.03	1.55	0.98	0.38	2.65	0.5	0.75	1.06	1.27	3.52	4.61	2.76	4.09	3.44	0.98	1.38	1.4	1.28	1.15	1.62	2.36	3.06	1.51	2.79	3.16	1.93	1.79	2.91	2.23	2.14		Cep89	1.48167	1.05333	3.28167	1.30167	2.388		Cep89	1.6	0.025197	1.6	1.07915	0.399148	0.00685867
Cep97	0.62	2.59	1.67	1.21	4.1	1.25	1.06	1.23	7.05	2.08	2.3	1.05	2.18	5.15	3.6	3.82	5.01	4.14	1.86	1.2	1.8	1	1.44	1.92	2.2	1.75	3.12	4.08	2.62	1.51	1.67	2.6	0.91	2.75		Cep97	1.90667	2.46167	3.98333	1.53667	2.321		Cep97	0.12	0.753261	0.12	0.240549	0.380714	0.527493
Cep135	0.92	1.76	1.2	0.48	1.96	1.15	0.96	0.74	3.08	1.21	1.19	0.84	1.11	2.87	1.9	2.15	2.29	2.45	1.45	0.9	1.07	0.62	0.67	1.04	2.21	1.54	1.88	2.65	1.57	0.92	0.59	1.72	0.95	0.96		Cep135	1.245	1.33667	2.12833	0.958333	1.499		Cep135	0.12	0.754513	0.12	0.172871	0.274797	0.529293
cep290	0.34	0.18	0.22	0.24	1.4	0.39	0.2	0.1	2.32	0.21	0.34	0.16	0.53	1.55	0.21	0.64	1.73	0.87	0.31	0.78	0.1	0.45	0	0.15	0.79	0.1	0.47	1.1	0.22	0.97	0.12	0.77	0.63	0.71		cep290	0.461667	0.555	0.921667	0.298333	0.588		cep290	0.1	0.79289	0.1	0.369385	0.668124	0.580353
cer	92.79	131.19	117.51	54.95	162.62	114.55	77.48	103.2	253.29	145.79	123.97	166.19	232.36	1569.61	1175.59	1198.51	588.94	709.55	187.74	123.56	126.88	76.39	77.22	216.39	231.86	1211.08	808.56	657.02	693.97	112.7	152.43	374.71	151.84	267.92		cer	112.268	144.987	912.427	134.697	466.209		cer	6.18	6.55684e-07	6.18	2.02975	0.369808	4.04985e-08
Cerk	3.77	6.15	5	4.18	5.17	5.5	3.74	3.54	4.66	5.02	7.14	4.28	10.01	14.47	15.15	14.34	14.02	13.8	6.49	7.17	5.34	4.23	2.87	8.27	12.62	15.54	15.11	16.2	14.87	6.79	6.07	12.65	12.36	9.12		Cerk	4.96167	4.73	13.6317	5.72833	12.133		Cerk	11.17	6.70295e-12	11.17	0.961261	0.130088	1.47568e-13
cert	12.56	13.99	15.37	7.34	14.88	16.23	10.72	8.49	20.03	11.14	21.04	10.93	33.63	25.88	31.92	34.82	30.03	36.74	19.52	14.61	11.03	9.48	5.75	23.33	37.05	37.65	36	33.48	38.57	17.5	16.46	44.65	24.93	32.18		cert	13.395	13.725	32.17	13.9533	31.847		cert	3.54	0.000286639	3.54	0.719864	0.175103	3.9382e-05
cerv	6.49	10.51	9.98	5.77	12.26	10.19	6.29	6	10.77	7.89	12.26	6.27	7.04	6.91	7.76	9.29	10.12	10.25	9.17	4.4	4.88	6.78	3.82	8.3	6.73	9.71	6.1	5.33	7.16	5.57	4.71	9.5	12.57	4.14		cerv	9.2	8.24667	8.56167	6.225	7.152		cerv	1.72	0.0190397	-1.72	-0.483719	0.172084	0.00493943
Cf2	10.75	15.49	11.78	10.33	16.72	11.84	10.05	13.22	15.62	16.17	11.99	16.02	13.93	24.27	25.39	25.93	20.16	18.88	16.04	12.91	12.66	10.42	11.28	13.22	12.87	15.12	21.76	23.93	29.13	11.94	13.77	20.6	9.43	18.4		Cf2	12.8183	13.845	21.4267	12.755	17.695		Cf2	0.02	0.963089	0.02	0.0220217	0.184858	0.905174
Cfp1	4.26	5.93	5	3.23	9.99	3.8	3.51	2.86	6.58	5.55	4.22	4.44	8.12	7.04	10.5	11.07	9.84	7.89	5.59	3.41	3.61	2.96	3.1	7.08	5.21	2.86	5.15	8.67	10.54	3.57	4.25	8.29	6.15	4.3		Cfp1	5.36833	4.52667	9.07667	4.29167	5.899		Cfp1	1.47	0.0340815	1.47	0.453	0.175246	0.00973973
cg	7.82	9.57	9.42	6.63	15.03	10.35	9.6	8.35	13.66	10.44	10.28	7.39	12.76	13.38	15.01	15.03	15.82	15.96	11.52	6.97	8.93	7.61	6.65	12.74	12.42	12.96	16.37	16.19	16.21	8.87	6.86	13.22	12.72	8.96		cg	9.80333	9.95333	14.66	9.07	12.478		cg	0	0.989669	0	0.00299524	0.0872641	0.972619
CG1024	1.33	2.17	0.95	1.47	4.09	1.4	1.72	0.99	2.14	1.93	1.81	1.4	2.96	3.27	2.55	5.15	3.86	4.28	1.91	0.95	0.75	2.23	1.11	1.92	1.46	2.59	5.36	3.59	3.62	1.89	1.03	2.55	2.5	2.62		CG1024	1.90167	1.665	3.67833	1.47833	2.721		CG1024	1.71	0.0193975	1.71	0.584611	0.208495	0.00504807
CG1074	8.89	6.41	13.03	11.07	8.83	12.37	10.24	3.08	7.93	7.26	10.28	5.87	11.81	11.08	12.21	6.13	10.99	10.08	9.8	4.88	5.89	9.32	4.4	7.69	7.79	8.55	8.79	10.43	11.99	6.63	7.48	11.44	6.15	8.87		CG1074	10.1	7.44333	10.3833	6.99667	8.812		CG1074	0.03	0.943167	-0.03	-0.05158	0.275811	0.851651
CG1077	0	0	0	0	0	0.11	0	0	0.76	0	0	0	0	0.28	0.54	0.42	0.36	0.12	0	0.08	0	0	0	0.44	0	0.67	0	0	0.73	0	0	0.35	0	0.19		CG1077	0.0183333	0.126667	0.286667	0.0866667	0.194		CG1077	0.1	0.799105	0.1	0.652417	1.21018	0.589814
CG1090	0.25	0.13	0.23	0.33	0.38	0.47	0.19	0.19	0.24	0.33	0.31	0.28	0.41	0.76	0.24	0.24	0.7	0.24	0.2	0.26	0.21	0.32	0.09	0.54	0.23	0.25	0.81	1	0.82	0.22	0.02	0.03	1.07	0.15		CG1090	0.298333	0.256667	0.431667	0.27	0.46		CG1090	0.08	0.827462	0.08	0.192059	0.402319	0.633092
CG1092	250.5	457.73	407.54	101.6	453.68	391.04	234.2	180.29	604.89	340.66	450.87	358.49	350.67	568.98	677.72	658.67	457.47	459.24	683.33	260.36	245.04	170.8	171.94	214.65	356.22	569.67	593.78	493.66	533.57	146.09	172.35	475.99	281.06	250.91		CG1092	343.682	361.567	528.792	291.02	387.33		CG1092	0.01	0.968523	0.01	0.0196989	0.203517	0.922891
CG1103	12.59	19.86	16.07	8.43	26.1	17.29	9.86	9.82	33.19	22.78	16.81	16.13	27.72	56.27	62.71	55.73	37.4	41.6	30.77	18.28	16.74	8.69	10.54	21.3	23.55	52.5	47.38	36.87	49.52	16.42	15.38	48.58	19.5	26.27		CG1103	16.7233	18.0983	46.905	17.72	33.597		CG1103	2.41	0.0039198	2.41	0.836083	0.248839	0.000779601
CG1105	4.23	4.9	5.21	4.94	5.77	2.84	6.14	7.59	8.51	4.94	4.79	5.04	4.97	11.08	9.07	9.48	8.08	9.53	4.74	6.85	4.75	5.09	4.63	5.94	6.61	15.58	9.96	11.59	8.83	6.82	5.65	8.07	6.2	6.97		CG1105	4.64833	6.16833	8.70167	5.33333	8.628		CG1105	0.08	0.827462	-0.08	-0.104127	0.218158	0.633149
CG1113	0.14	0	0	0.06	0	0	0	0	0	0.12	0	0	0	0.21	0.2	0	0	0	0	0	0	0.13	0.71	0.2	0.13	0	0.36	0	0	0.33	0	0	0	0		CG1113	0.0333333	0.02	0.0683333	0.173333	0.082		CG1113	0	NA	0	0.537404	1.35551	0.691768
CG1116	9.22	9.07	7.92	8.7	12.11	8.76	5.77	5.19	13.57	8.34	9.63	7.66	6.93	14.43	13.3	12.72	13.14	15.27	8.45	9.78	6.96	7.98	8.09	6.91	9.69	15.53	9.85	10.64	10.68	7.94	5	13.68	5.65	8.33		CG1116	9.29667	8.36	12.6317	8.02833	9.699		CG1116	0.05	0.892913	0.05	0.0571507	0.173903	0.742431
CG1124	15.69	5.15	32.18	27.16	10.14	24.71	26.27	4.72	1.97	14.16	45.12	7.34	1.65	0.31	0.61	0.06	0.47	10.55	9.08	3.69	7.66	25.95	14.85	13.19	2.82	1.47	0.74	0.7	0.15	4.79	14.69	2.34	1.81	4.72		CG1124	19.1717	16.5967	2.275	12.4033	3.423		CG1124	2.46	0.00346894	-2.46	-2.9804	0.877206	0.000679786
CG1126	0	0	0	0.3	0.4	0.53	0.3	0.17	0.7	0	0.31	0.09	0	0.11	0	1.74	0.3	1.16	0.51	0.08	0	0	0	0.25	0.61	0	0	0	0.31	0.1	0.1	0.41	0	0.24		CG1126	0.205	0.261667	0.551667	0.14	0.177		CG1126	0.09	0.821923	0.09	0.473722	0.965462	0.623661
CG1129	13.1	18.3	19.52	14.41	17.11	17.63	12.75	16.03	21.53	18.35	17.8	12.9	38.35	29.4	28.37	37.75	32.51	31.48	18.91	18.27	15.16	13.41	13.54	18.99	36.79	32.95	38.81	30.61	34.65	24.93	15.32	30.59	32.64	26.24		CG1129	16.6783	16.56	32.9767	16.38	30.353		CG1129	1.63	0.0234077	1.63	0.44683	0.163515	0.00628256
CG1136	1.02	0.2	0.59	1.35	1.72	2.29	0.69	0.25	2.99	0.6	0.49	0.08	0.43	2.87	0.55	1.07	1.85	2.1	0.43	1.03	0.45	1.86	0.48	1.05	0.51	0.51	0.77	2.89	1.31	0.94	0.64	0.7	1.29	0.46		CG1136	1.195	0.85	1.47833	0.883333	1.002		CG1136	0.11	0.768331	0.11	0.371483	0.617496	0.547443
CG1137	1.18	1.58	0.18	0.67	14.06	1.03	0.19	0.42	17.54	1.16	0.76	0.04	0.14	10.48	1.15	4.6	11.44	7.84	1.3	3.31	0.29	1.06	0.14	0.41	0.68	0	0.79	8.12	2.71	2.38	1.2	3.76	0.93	1.57		CG1137	3.11667	3.35167	5.94167	1.085	2.214		CG1137	0.09	0.821529	0.09	0.463808	0.941467	0.622264
CG1138	0.73	0.65	0	0.42	5.67	0.55	0	0.09	3.24	0.38	0.08	0	0.85	5.58	0.66	4.61	2.47	2.05	0.45	1.3	0	0.4	0	0.26	0.63	0	0.46	4.71	0.49	0.86	1.23	0.28	0	0		CG1138	1.33667	0.631667	2.70333	0.401667	0.866		CG1138	0.64	0.227856	0.64	1.54509	0.933681	0.0979577
CG1139	2.98	4.19	2.21	5.61	4.55	3.92	1.39	4.82	0.51	4.7	2.12	6.6	2.07	0.77	0	0	0.33	1.53	4.25	5.4	6.01	2.72	3.56	4.6	1.01	0.06	0.18	0	0.09	2.72	1.84	0.6	0	2.18		CG1139	3.91	3.35667	0.783333	4.42333	0.868		CG1139	1.53	0.0296091	-1.53	-2.36151	0.894379	0.00828096
CG1142	5.85	10.15	10.91	10.01	22.29	12.23	10.08	6.76	8.75	9.34	10.51	8.72	9.73	14.2	17.67	13.13	15.74	11.23	9.81	6.56	4.92	11.99	8.51	14.47	13.74	10.25	14.32	13.72	16.56	8.17	9.36	12.61	9.3	8.53		CG1142	11.9067	9.02667	13.6167	9.37667	11.656		CG1142	0.01	0.978927	0.01	0.01076	0.166003	0.948319
CG1143	150.82	91.94	81.89	115.5	13.36	3.99	50.7	42.47	8.55	3.37	93.38	125.59	7.45	2.57	1.68	1.95	0.95	2.31	53.19	91.73	4.99	47.49	63.12	7.85	10.13	1.69	0.97	0.98	0.75	65.54	86.86	6.39	6.39	60.85		CG1143	76.25	54.01	2.81833	44.7283	24.055		CG1143	7.72	1.90491e-08	-7.72	-4.44644	0.723411	7.92149e-10
CG1146	3.56	6.18	3.13	4.01	9.06	4.41	2.85	5.05	11.49	7.19	4.1	4.32	3.69	15.3	16.95	10.99	15.66	13.37	4.79	6.88	5.01	3.13	2.17	4.23	3.49	6.99	12.02	11.88	9.88	4.22	3.78	6.48	1.45	3.15		CG1146	5.05833	5.83333	12.66	4.36833	6.334		CG1146	0.62	0.239472	0.62	0.549645	0.338327	0.104248
CG1161	90.24	142.47	114.76	80.44	118.03	117.08	72.6	95.71	140.77	106.34	121.72	107.99	137.93	188.53	220.69	196.76	182.06	195.52	134.51	128.97	111.9	79.47	87.02	109.22	145.09	207.08	166.2	140.94	160.14	101.38	94.54	170.91	122.6	141.55		CG1161	110.503	107.522	186.915	108.515	145.043		CG1161	0.83	0.146739	0.83	0.226227	0.118459	0.0561651
CG1172	6.26	5.47	4.53	4.18	7.93	4.56	4.58	2.01	7.93	4.72	5.85	3.94	7.73	10.48	9.69	11.45	10.22	8.76	5.88	4.35	4.01	4.27	3.88	5.99	7.75	5.4	9.79	8.21	9.43	5.04	4.91	12.61	5.88	7.35		CG1172	5.48833	4.83833	9.72167	4.73	7.637		CG1172	1.59	0.0256361	1.59	0.484147	0.179576	0.00701652
CG1208	7.52	1.47	1.19	5.78	1.93	1.59	6.22	2.43	1.3	1.43	3.42	0.95	12.16	190.46	206.89	230.66	131.68	150.27	0.58	5.03	1.35	3.04	3.08	71.45	25.1	425.19	410.73	375.3	316.28	13.7	64.85	191.15	31.22	149.78		CG1208	3.24667	2.625	153.687	14.0883	200.33		CG1208	15.89	1.27455e-16	15.89	4.96157	0.564715	1.55021e-18
CG1213	2.19	0.38	0.2	1.46	0.76	1.89	1.3	0.55	0.29	0.35	2.14	0.39	0.27	2.34	1.85	2.73	0.56	0.69	0.07	0.71	0.91	1.88	1.72	1.79	0.16	2.51	3.69	3.63	2.25	0.31	1.03	1.87	0	0.94		CG1213	1.14667	0.836667	1.40667	1.18	1.639		CG1213	0.03	0.928644	0.03	0.139173	0.602477	0.817313
CG1218	20.39	23.71	22.6	20.23	24.98	25.59	18.67	12.1	26.86	20.03	23.17	12.49	41.29	34.01	31.19	36.78	33.28	36.76	20.42	15.91	17.11	16.18	14.92	19.27	36.89	34.82	27.38	20.6	26.69	19.52	13.42	36.57	35.2	27.7		CG1218	22.9167	18.8867	35.5517	17.3017	27.879		CG1218	1.28	0.0529115	1.28	0.391561	0.163144	0.0163908
CG1227	12.93	13.29	14.01	14.72	12.02	14.98	8.71	10.35	17.2	11.74	12.44	8.96	14.95	14.35	16.03	21.78	19.19	20.1	11.72	11.08	10.02	9.95	6.32	12.96	18.25	22.02	19.33	15.09	12.14	14.24	11.14	13.13	7.55	14.45		CG1227	13.6583	11.5667	17.7333	10.3417	14.734		CG1227	0.07	0.84408	0.07	0.0637394	0.144152	0.658368
CG1231	0.17	0	0	0	0.24	0	0.35	0	0	0.11	0.18	0	0	0.38	0	0	0	0.27	0	0	0	0	0	0.43	0	0	0	0	0	0	0	0	0	0		CG1231	0.0683333	0.106667	0.108333	0.0716667	0		CG1231	0.05	0.900961	-0.05	-0.387164	1.27227	0.760891
CG1233	0.9	0.26	1.46	0.97	0.91	1.16	0.41	0.26	2.28	0.52	0.69	0.81	0.34	1.96	1.88	1.11	2.53	2.17	1.41	0.69	0.4	1.42	1.02	0.7	1.49	1.82	1.83	1.02	2.32	1.89	0.53	0.82	1.65	1.58		CG1233	0.943333	0.828333	1.665	0.94	1.495		CG1233	0.28	0.526816	0.28	0.4971	0.475249	0.295571
CG1234	15.26	18.46	22.48	14.74	17.7	25.81	18.44	8.42	20.98	19.58	27.15	11.49	22.39	20.8	26.89	25.95	19.21	21.16	16.52	13.14	10.19	15.88	15.38	15.17	24.57	14.94	20.48	14.7	15.51	12.13	10.51	24.47	16.92	14.59		CG1234	19.075	17.6767	22.7333	14.38	16.882		CG1234	0.17	0.677554	-0.17	-0.155592	0.201335	0.43964
CG1236	55.29	37.67	47.99	41.65	40.59	38.07	43.88	33.91	91.01	45.09	44.69	42.68	35.61	197.7	69.91	53.7	72.43	58.31	46.68	39.09	31.65	32.67	23.3	29.41	37.49	98.13	36.42	60.65	39.16	26.23	25.56	41.37	35.06	39.16		CG1236	43.5433	50.21	81.2767	33.8	43.923		CG1236	0.06	0.862264	0.06	0.140845	0.354066	0.690782
CG1239	5.35	6.58	4.31	5.26	8.27	5.66	7.45	3.56	9.17	3.31	6.79	5.05	6.42	8.65	5.99	10.26	8.94	6.25	5.98	8.34	2.98	5.46	6.63	4.21	7.08	7.29	2.84	7.48	5.5	5.68	5.66	5.07	2.18	5		CG1239	5.905	5.88833	7.75167	5.6	5.378		CG1239	0.13	0.743075	-0.13	-0.157934	0.242609	0.515058
CG1246	41.35	25.39	12.29	39.42	5.24	34.29	17.58	19.21	12.08	10.9	21.76	2.57	12.55	1.81	1.07	1.06	4.16	2.11	0.64	40.68	17.89	29.79	46.37	5.31	8.32	1.63	1.56	0.95	1.97	29.91	7.27	6.18	2.93	15.42		CG1246	26.33	14.0167	3.79333	23.4467	7.614		CG1246	2.34	0.00458079	-2.34	-2.16994	0.655856	0.000937755
CG1265	84.56	56.96	71.87	73.75	56.41	74.39	91.51	47.7	47.86	65.64	56.46	55.51	52.17	36.69	46.33	40.4	36.49	55.11	58.95	54.35	56.47	73.55	55.6	58.48	59.7	47.66	36.21	26.21	44.36	39.8	61.96	52.27	39.8	58.04		CG1265	69.6567	60.78	44.5317	59.5667	46.601		CG1265	3.36	0.000435978	-3.36	-1.02446	0.256191	6.36623e-05
CG1271	3.69	4.68	2.7	3.23	5.64	4.14	4.29	2.82	3.5	3.41	2.11	2.4	1.6	9.45	7.82	8.22	5.59	6.64	5.12	4.41	3.45	4.01	1.28	1.35	2.41	6.25	6.38	6.55	6.52	1.57	3.77	4.87	1.49	4.25		CG1271	4.01333	3.08833	6.55333	3.27	4.406		CG1271	0.44	0.364455	0.44	0.451283	0.335354	0.178402
CG1273	0.41	0.05	0.33	0.25	0.13	0.19	0	0.01	0.22	0.11	0.18	0.17	0.12	0.33	0.25	0.17	0.5	0.17	0.25	0.1	0.22	0.12	0.01	0.15	0.17	0.18	1.01	1.62	0.75	0.33	0.04	0.3	0.9	0.26		CG1273	0.226667	0.115	0.256667	0.141667	0.556		CG1273	0.23	0.588107	0.23	0.63313	0.676683	0.34946
CG1275	0.04	0.39	0.4	0.22	1.1	0.56	0.23	0.94	1.65	0.09	0.05	0.33	0.36	1.25	1.25	0.69	0.95	0.11	0.45	0.49	0.49	0.54	0.86	0.46	0.41	1.34	1.17	1.96	1.03	0.69	1.5	0.21	2.98	0.75		CG1275	0.451667	0.548333	0.768333	0.548333	1.204		CG1275	0.01	0.967092	-0.01	-0.0746819	0.728367	0.918333
CG1288	1.1	0.45	0.98	0.16	10.56	0.52	0	1.38	13.78	1.05	0.45	0	0.54	8.15	1.03	3.43	10.17	5.41	0.7	4.65	0.49	0.87	0.21	0	1.91	0	0.18	12.21	1.93	1.94	0.88	3.89	0.55	2.16		CG1288	2.295	2.77667	4.78833	1.15333	2.565		CG1288	0.06	0.867786	0.06	0.385314	0.999059	0.699736
CG1291	27.52	27.41	25.43	22.19	27.83	31.16	18.95	17.27	32.92	22.27	25.9	22.27	33.76	55.99	72.59	67.96	53.71	64.5	27.49	23.44	24.09	19.59	22.04	32.36	45.15	75.73	56.35	50.17	64.03	28.59	24.14	59.41	31.37	46.01		CG1291	26.9233	23.2633	58.085	24.835	48.095		CG1291	6.38	4.17915e-07	6.38	0.752207	0.134849	2.43076e-08
CG1299	8.8	6.36	6.27	7.48	5.52	5.29	6.69	4.67	2.84	4.18	4.88	9.19	5.3	0.5	0.37	0.09	0.42	1.52	4.5	7.66	4.48	5.27	2.95	4.98	2.27	0.36	0.04	0	0.06	3.9	11.14	1.41	3.26	3.48		CG1299	6.62	5.40833	1.36667	4.97333	2.592		CG1299	1.97	0.0107007	-1.97	-2.25723	0.74646	0.00249524
CG1304	0	0	0	0	0	0	0	0	0	0	0	0	0	0.52	0	0	0	0	0	0	0	0	0	0	0	0	0	0	0	0	0	0.22	0	0		CG1304	0	0	0.0866667	0	0.022		CG1304	0	NA	0	0.58999	1.34851	0.66174
CG1307	45.69	57.67	55.06	48.82	64.63	61.47	49.72	28.12	60.46	48.87	70.32	37.41	50.9	57.42	65.89	65.63	58.23	72.74	53.54	45.86	33.73	46.25	31.19	31.1	66.81	57.15	57.48	50.3	50.52	40.84	34.25	61.19	43.8	39.17		CG1307	55.5567	49.15	61.8017	40.2783	50.151		CG1307	0.55	0.278783	-0.55	-0.207151	0.135289	0.125727
CG1309	10.87	9.94	8.91	9.38	11.74	9.48	7.93	6.07	12.13	10.17	11.33	6.51	10.67	14.59	14.65	11.56	14.54	17.17	7.9	8.36	6.53	8.26	7.05	8.81	13.76	10.17	12.41	14.6	11.87	8.79	8.02	11.51	7.9	10.56		CG1309	10.0533	9.02333	13.8633	7.81833	10.959		CG1309	0.1	0.791651	0.1	0.0736069	0.13228	0.577906
CG1314	0.4	0.12	0.11	0.05	1.46	0.44	0	0.17	4.65	0.09	0	0	0.51	1.27	0	0.54	3.52	1.92	0.09	0.93	0.21	0.35	0	0	0.16	0	0.51	2.02	0.16	0.75	0.66	1.54	0.23	0.5		CG1314	0.43	0.818333	1.29333	0.263333	0.653		CG1314	0.04	0.906388	0.04	0.334342	1.15932	0.773045
CG1315	9.02	2.92	2.69	11.4	2.36	5.1	6.37	9.76	6.01	1.94	8.33	0.54	2.14	2.59	0.28	0.98	2.35	1.79	0.17	9.48	3.99	7.27	10.59	0.91	2.52	0	0.33	0.98	0.21	5.74	4.38	2.27	1.27	7.21		CG1315	5.58167	5.49167	1.68833	5.40167	2.491		CG1315	2.52	0.00300894	-2.52	-2.12627	0.617531	0.000574923
CG1316	9.43	13.85	10.83	9.47	19.77	10.59	8.42	9.6	20.1	11.71	8.13	9.35	12.42	18.58	16.03	22.16	16.54	16.58	12.06	13.02	8.73	9.41	7.51	11.1	11.62	18.92	17.05	22.75	12.49	9.97	8.64	16.32	11.93	11.56		CG1316	12.3233	11.2183	17.0517	10.305	14.125		CG1316	0.04	0.910648	0.04	0.0523853	0.188767	0.781386
CG1317	10.75	12.76	10.55	10.24	21.65	10.63	11.77	9.58	20.92	9.5	11.94	10.83	14.79	28.91	26.4	21.6	26.52	21.69	14.64	10.86	10.66	9.27	10.96	15.73	16.78	19.21	20.71	23.7	23.03	12.98	14.3	23.64	13.05	18.13		CG1317	12.7633	12.4233	23.3183	12.02	18.553		CG1317	1.07	0.0842738	1.07	0.352428	0.160994	0.0285913
CG1324	4.02	3.49	1.15	0.87	33.15	2.37	0.86	1.14	49.7	2.22	1.67	0.17	0	27.04	3.26	10.36	27.01	32.86	4.98	11.83	0.48	3.19	0	1.07	5.5	0	1.81	15.97	0.91	3.79	3.99	15.09	0.43	5.35		CG1324	7.50833	9.29333	16.755	3.59167	5.284		CG1324	0.08	0.82625	0.08	0.481668	1.00227	0.630818
CG1339	0	0	0	0	0	0	0	0	0	0	0	0	0	0	0	0	0	0	0	0	0	0	0	0	0	0	0	0	0	0	0	0	0	0		CG1339	0	0	0	0	0		CG1339	0	NA	0	NA	NA	NA
CG1344	8.67	10.67	9.36	9.11	11.88	9.86	9.34	8.74	15.1	11.5	13.92	9.36	14.26	22.4	21.43	23.49	16.98	16.87	12.62	10.7	12.12	8.98	8.93	11.05	14.8	20.02	20.38	16.51	20.68	10.75	10.68	20.99	6.37	13.86		CG1344	9.925	11.3267	19.2383	10.7333	15.504		CG1344	0.87	0.134481	0.87	0.209162	0.106901	0.050395
CG1354	41.99	42.74	54.22	46.23	43.62	47.88	41.17	34.09	42.46	40.95	45.84	43.29	40.91	41.98	44.15	41.31	43.72	49.72	39.65	33.71	41.93	43.06	37.13	35.72	48.51	51.45	43.08	43.19	53.88	29.8	40.74	42.85	49.96	38.55		CG1354	46.1133	41.3	43.6317	38.5333	44.201		CG1354	3.32	0.000474851	-3.32	-0.49807	0.125272	7.01129e-05
CG1358	0.53	0.45	0.41	0.71	0.72	0.65	0.35	0.5	0.42	0.52	0.73	0.45	0.53	0.68	0.6	0.54	0.78	0.59	0.48	0.41	0.44	0.69	0.53	0.67	0.44	0.35	0.7	0.94	0.98	0.52	0.33	0.3	0.55	0.42		CG1358	0.578333	0.495	0.62	0.536667	0.553		CG1358	0.37	0.428971	-0.37	-0.246459	0.202283	0.223079
CG1360	2.37	2.99	2.7	3.55	4.02	2.92	2.22	2.41	2.95	2.8	4.56	1.95	5.1	4.61	4.99	4.14	3.63	3.98	3.31	1.26	1.98	1.75	1.1	2.22	3.48	3.24	4.68	3.66	4.22	3.66	3	4.9	2.63	2.85		CG1360	3.09167	2.815	4.40833	1.93667	3.632		CG1360	0.08	0.841183	0.08	0.0942909	0.210366	0.653993
CG1368	502.04	143.25	639.7	386.71	153.41	177.48	570.8	132.04	46.83	124.05	641	267.75	21.38	0.85	0.34	0	0.16	124.24	349.56	181.21	146.21	416.34	168.69	175.49	34.9	5.82	4.21	1.56	3.01	359.48	646.8	31.97	21.95	300.93		CG1368	333.765	297.078	24.495	239.583	141.063		CG1368	2.02	0.00945815	-2.02	-3.31882	1.08225	0.00216515
CG1371	9.87	11.33	11.52	10.95	12.02	9.52	11.7	10.53	18.32	7.15	9.33	7.74	19.41	20.3	22.13	18.68	19.02	11.44	15.31	7.24	5.32	11.92	9.84	13.47	21.47	18.25	17.32	22.17	18.75	15.14	14.04	24.04	22.47	21.91		CG1371	10.8683	10.795	18.4967	10.5167	19.556		CG1371	0.25	0.561336	0.25	0.230079	0.2332	0.323832
CG1387	0.47	0.28	0.3	1.02	4.34	0.42	0.7	0	7.26	0.25	0.49	0	0.26	3.14	0.58	2.96	3.47	3.13	1.27	2.07	0.12	0.76	0.26	0.29	1.11	0	0.04	3.97	0.99	0.93	0.58	2.49	1.48	2.68		CG1387	1.13833	1.45	2.25667	0.795	1.427		CG1387	0.04	0.903569	0.04	0.289963	0.984738	0.768408
CG1394	9.22	6.98	1.82	5.2	64.28	6.78	0.75	1.13	135.87	5.39	2.24	0	1.65	76.22	4.42	29.69	83.12	65.58	9.79	35.56	1.67	7.32	0	0.82	15.16	0.2	4.44	66.09	7.67	22.68	10.39	43.94	7.09	22.2		CG1394	15.7133	24.23	43.4467	9.19333	19.986		CG1394	0.08	0.835088	0.08	0.483138	1.05353	0.64653
CG1402	0.49	0.08	0.35	0.57	0.43	0.76	0.26	0.07	0.17	0.38	0.2	0.06	0.12	0.72	0.54	0.34	0.86	0.53	0.08	0.06	0.26	0.41	0.3	0.75	0.6	0.11	0.99	1.49	1.8	0.4	0.18	0.56	1.47	0.12		CG1402	0.446667	0.19	0.518333	0.31	0.772		CG1402	0.7	0.198261	0.7	0.839025	0.482402	0.0819879
CG1407	3.48	4.6	5.62	3.29	6.1	4.11	3.41	2.38	7.37	3.8	5.52	3.72	8.92	11.04	10.18	11.45	10.37	11.16	5.14	4.69	3.02	4.47	2.98	6.11	11.48	14.88	11.64	13.03	10.57	5.77	5.08	11.17	5.9	7.67		CG1407	4.53333	4.36667	10.52	4.40167	9.719		CG1407	5.22	6.03076e-06	5.22	0.742601	0.147704	4.96546e-07
CG1409	0.66	0.18	0	0	2.83	0.25	0	0	6	0	1.1	0	0	1.51	0	0.82	4.39	4.34	0	1.64	0	0	0	0	0	0	0	2.58	0.37	0.48	0	1.27	0	0		CG1409	0.653333	1.18333	1.84333	0.273333	0.47		CG1409	0.03	0.935725	0.03	0.266034	1.25328	0.831897
CG1416	69.04	114.64	107.53	75.44	114.28	95.84	64.36	61.14	114.43	92.61	79.26	84.57	157.37	104.6	129.49	134.51	134.98	108.43	103.51	67.62	63.2	74.14	61.8	107.43	150.83	110.59	138.65	146.1	118.72	78.92	97.38	163.14	139.41	107.76		CG1416	96.1283	82.7283	128.23	79.6167	125.15		CG1416	0.1	0.802402	0.1	0.0962915	0.180779	0.594278
CG1418	21.89	25.28	33.09	18.61	39.54	30.22	19.11	16.07	35.9	19.79	19.88	19.05	35.79	24.3	28.61	29.98	38.18	43.7	26.85	24.25	13.49	22.84	12.81	25.77	44.43	35.33	31.6	31.21	24.57	26.81	25.38	44.88	35.74	30.19		CG1418	28.105	21.6333	33.4267	21.0017	33.014		CG1418	0.08	0.824063	0.08	0.0969966	0.199323	0.62652
CG1421	0	0	0	0	0.79	0.21	0.29	0	1.82	0.18	0.15	0	0	0.42	0.41	0	0.38	0	0.67	0	0	0	0	0	0	0	0	0.48	0	0.4	0	0	0	0		CG1421	0.166667	0.406667	0.201667	0.111667	0.088		CG1421	0.24	0.572578	-0.24	-1.06395	1.1038	0.335096
CG1427	1.87	4.5	3.29	2.87	8.54	5.17	3.33	4.27	13.87	5.34	4.64	4.54	2.45	10.06	7	7.5	8.98	7.95	6.06	4.53	3.55	5.48	3.84	3.42	3.29	5.98	4.95	2.9	9.43	5.14	5.15	6.43	0	3.5		CG1427	4.37333	5.99833	7.32333	4.48	4.677		CG1427	0.14	0.720748	-0.14	-0.225824	0.325812	0.48824
CG1428	0.4	0.96	0	0.57	1.88	0.38	0.05	0.36	6.46	0.13	0.11	0	0	2.23	0.6	1.75	4.25	1.75	0.18	1.68	0.14	0.28	0	0.18	0.36	0.25	0	1.32	0.79	1.33	0.35	0.29	1.12	0.52		CG1428	0.698333	1.185	1.76333	0.41	0.633		CG1428	0.03	0.933653	0.03	0.226062	1.03583	0.827241
CG1434	2.61	4.91	2.19	3.36	2.98	3.15	2.3	3.91	3.86	2.53	5.03	1.81	2.2	5.69	5.74	3.99	4.58	2.57	6	3.46	3.54	2.67	3.28	3.22	4.3	3.33	6.23	6.75	4.67	1.53	1.59	5.02	1.8	2.83		CG1434	3.2	3.24	4.12833	3.695	3.805		CG1434	0.16	0.692743	-0.16	-0.217935	0.292824	0.456723
CG1440	12.71	19.88	13.33	11.37	26.48	19.19	12.06	12.71	25	14.69	17.3	16.58	20.49	30.57	42.08	29.88	30.19	24.89	20.32	14.43	12.92	14.39	15.84	21.72	23.1	27.07	33.39	28.89	27.82	19.98	17.7	32.22	24.48	22.73		CG1440	17.16	16.39	29.6833	16.6033	25.738		CG1440	0.83	0.14739	0.83	0.294784	0.154557	0.0564843
CG1441	1.97	1.42	3.51	3.48	0.55	0.98	1.82	0.52	0.13	0.31	88.03	3.82	0	0	0.04	0	0.03	0.47	2.02	0.11	0.44	1.75	1.23	0.59	0.87	0.04	0	0.08	0	0.77	0.84	0.19	0.08	0.53		CG1441	1.985	15.7717	0.09	1.02333	0.34		CG1441	0	NA	0	-5.77097	1.14903	NA
CG1461	2.97	1.72	2.66	2.55	1.67	1.71	3.06	1.57	0.47	1.32	0.88	1.92	1.01	0.49	0.31	0.04	0.31	0.79	3.04	1.23	1.52	3.25	1.87	2.47	0.65	0.25	0.58	0.66	0.5	2.93	4.47	0.55	1.44	1.75		CG1461	2.21333	1.53667	0.491667	2.23	1.378		CG1461	2.39	0.00410195	-2.39	-2.11881	0.633476	0.000823623
CG1463	16.75	22.52	19.32	18.09	29.87	24.19	19.62	15.74	21.8	19.92	20.18	17.21	23.56	27.87	30.03	26.47	30	29.27	26.52	13.02	16.85	19.87	18.68	21.6	30.95	20.73	25.94	28.55	30.68	19.64	18.8	31.44	25.67	20.67		CG1463	21.79	19.0783	27.8667	19.4233	25.307		CG1463	0.04	0.919058	-0.04	-0.0243688	0.0948698	0.797283
CG1468	129.66	128.37	81.85	110.19	77.35	109.98	149.79	85.49	118.47	89.9	142.7	144.21	58.11	72.02	11.44	8.69	103.02	36.03	127.27	148.41	75.52	117.46	101.29	80.12	53.08	32.24	23.78	42.15	41.73	75.31	153.54	32.25	1.13	74.72		CG1468	106.233	121.76	48.2183	108.345	52.993		CG1468	2.61	0.00244567	-2.61	-1.82155	0.519577	0.000455167
CG1486	3.75	5.99	6.92	5.57	10.3	7.93	5.95	8.25	9.03	5.96	4.74	4.93	10.05	10.04	11.73	10.78	13.55	9.71	9.89	4.67	5.53	7.19	7.1	10.81	13.29	7.41	12.02	11.76	12.13	13.03	8.34	13.38	19.42	13.65		CG1486	6.74333	6.47667	10.9767	7.53167	12.443		CG1486	0.19	0.65105	0.19	0.173727	0.211823	0.41213
CG1492	0.37	0.91	0.57	1.16	1.17	0.71	0.86	0.66	0.43	0.43	0.53	0.84	0.29	0.37	0.67	0.24	0.4	0.51	0.67	0.73	0.9	1.04	1.57	1.18	0.41	0.34	0.45	0.96	0.55	0.81	1	0.2	0	0.95		CG1492	0.815	0.625	0.413333	1.015	0.567		CG1492	1.63	0.0236304	-1.63	-1.16717	0.427789	0.00636445
CG1494	0.08	1.28	0.3	0.39	0.74	0.3	0.11	4.06	2.23	0.8	0.2	0.26	0.68	1.08	1.15	1.3	0.92	0.72	0.17	4.93	1.4	0.35	0.25	0.48	0.53	1.03	0.85	0.95	1.64	0.33	0.7	1.62	0.97	2.07		CG1494	0.515	1.27667	0.975	1.26333	1.069		CG1494	0.46	0.342867	-0.46	-0.981346	0.706253	0.164678
CG1503	0.31	0.23	0.41	0.12	1.34	0.25	0.19	0	2.52	0.16	0.27	0	0	1.12	0.12	0.44	0.94	0.47	0.35	0.36	0.32	0.42	0	0.36	0.03	0.07	0.06	1.1	0.23	0.39	0.37	0.94	0	0.94		CG1503	0.443333	0.523333	0.515	0.301667	0.413		CG1503	0.04	0.907091	-0.04	-0.286466	0.997764	0.77403
CG1504	0.17	0	0.02	0.09	0.09	0.11	0.01	0.04	0.14	0.03	0.01	0.02	0.12	0.35	0.21	0.07	0.33	0.17	0.06	0.06	0.06	0.03	0	0.12	0.14	0.05	0.47	0.55	0.56	0.08	0.06	0.06	0.41	0.05		CG1504	0.08	0.0416667	0.208333	0.055	0.243		CG1504	1.87	0.0135302	1.87	1.71615	0.584172	0.00330601
CG1513	5.49	7.04	4.87	4.44	8.89	5.79	4.83	6.01	7.14	6.6	6.66	6.09	7.4	13.78	12.89	11.91	11.7	10.61	7.74	5.81	5.88	4.64	4.01	8.44	8.59	8.42	11.95	10.52	11	6.82	4.92	10.22	7.36	7.84		CG1513	6.08667	6.22167	11.3817	6.08667	8.764		CG1513	1.01	0.0967522	1.01	0.280958	0.132348	0.033765
CG1523	8.62	6.96	6.88	5.32	7.32	7.66	6.9	3.98	11.71	9.39	7.7	6.56	7.95	10.63	9.79	13.81	10.93	10.85	8.3	6.1	6.53	4.64	5.5	6.27	8.2	10.08	8.77	8.73	11.2	7.72	5.66	13.72	5.15	9.94		CG1523	7.12667	7.70667	10.66	6.22333	8.917		CG1523	0.07	0.84804	-0.07	-0.0716121	0.164699	0.663703
CG1529	4.48	4.58	6.12	4.5	5.87	4.56	5.14	2.6	8.26	3.73	5.8	4.95	12.15	9.13	8.51	10.95	11.94	8.35	8.03	5.61	4.38	5.26	5.9	7.11	10.44	10.31	12.08	10.53	15.72	5.83	5.3	13	11.1	7.65		CG1529	5.01833	5.08	10.1717	6.04833	10.196		CG1529	1.06	0.0879226	1.06	0.483433	0.222887	0.0300862
CG1532	43.63	40.49	22.79	51.51	30.46	52.16	54.84	61.35	51.71	29.7	32.66	23.86	35.62	81.4	80.5	86.25	51.46	63.35	28.99	65.8	45.39	38.61	64.35	36.41	50.23	111.14	91.22	75.25	70.49	45.34	32.65	48.94	33.17	81.9		CG1532	40.1733	42.3533	66.43	46.5917	64.033		CG1532	0.01	0.984149	0.01	0.0146238	0.301741	0.961346
CG1537	1.35	1.6	2.48	2.93	4.36	3.93	2.27	5.04	0.89	3.86	1.2	0.8	0	0.14	0	0	0	0.3	1.2	1.29	2.53	2.47	1.6	3.29	0.65	0	0	0	0	0.92	3.76	0.35	0.28	1.53		CG1537	2.775	2.34333	0.0733333	2.06333	0.749		CG1537	6.43	3.75006e-07	-6.43	-4.92264	0.879256	2.16046e-08
CG1542	27.07	22.15	36.27	26.24	32.2	38.48	26.64	15.62	31.36	30.53	35.04	13.03	32.09	31.28	43.75	37.56	34.17	27.94	31.73	20.87	16.46	33.66	14.07	18.62	42.4	38	27.43	29.6	36.07	16.93	19.86	27.1	34.67	21.98		CG1542	30.4017	25.37	34.465	22.5683	29.404		CG1542	0.07	0.843874	-0.07	-0.0859112	0.193822	0.657587
CG1544	15.54	10.01	7.65	12.01	7.94	10.04	8.35	8.97	11.91	5.6	12.96	9.13	6.76	23.52	24.7	20.75	18.88	15.34	6.61	15.74	6.42	10.2	6.31	5.55	5.3	17.39	12.96	12.67	16.66	9.67	8.41	10.74	2.9	10.24		CG1544	10.5317	9.48667	18.325	8.47167	10.694		CG1544	0.43	0.371831	0.43	0.346748	0.260613	0.183351
CG1545	0.84	0.11	0.23	0.77	0.42	0.75	0.42	0	0	0.26	0.22	0.44	1.38	0.83	0.74	0.33	1.45	0	0.24	0	0.35	0.41	0.47	0.26	0.93	0.33	2.01	2.32	1	0.8	0.07	0.1	1.09	0		CG1545	0.52	0.223333	0.788333	0.288333	0.865		CG1545	0.36	0.437748	0.36	1.07902	0.896477	0.228734
CG1550	15.91	14.41	14.73	13.89	13.1	14.26	11.58	7.94	10.47	16.57	13.4	12.51	11.01	14.56	30.86	20.75	17.92	18.61	19.02	10.5	7.97	9.75	7.12	14.01	14.33	16.47	16.76	13.31	19.14	12.64	11.25	13.1	5.87	8.13		CG1550	14.3833	12.0783	18.9517	11.395	13.1		CG1550	0.03	0.933003	0.03	0.0520329	0.237071	0.826275
CG1552	0.3	0.33	0.91	1.16	2.33	4.47	0.7	0.62	0	1.16	0.17	0	0.17	1.58	0.66	0	0.31	0.12	0	0.25	0.21	3.56	0.97	1.68	0.11	0.62	0.35	0	0.5	0	0.62	0	0.94	0		CG1552	1.58333	0.441667	0.473333	1.11167	0.314		CG1552	0.08	0.829684	-0.08	-0.473169	1.00313	0.637145
CG1561	0	0	0.04	0	0.07	0	0	0	0	0	0.15	0	0	0	0.03	0	0	0	0	0.03	0.23	0.06	0	0.04	0	0	0	0	0	0.03	0	0.04	0	0		CG1561	0.0183333	0.025	0.005	0.06	0.007		CG1561	0	NA	0	-0.456646	1.34867	0.734919
CG1571	0.13	0.19	0.33	0.37	1.99	0.72	0	0	4.59	0	0.39	0	0	1.52	0.39	0	2.43	1.57	0.05	0.38	0.12	0	0.31	0	0.5	0.29	0.75	1.21	0.29	0.06	0.24	0.92	2.88	0.82		CG1571	0.621667	0.83	0.985	0.143333	0.796		CG1571	0	0.998386	0	0.00710527	1.2886	0.995601
CG1572	59.07	80.24	63.83	53.91	52.46	50.85	52.23	70.02	67	72.61	57.19	74.19	171.13	208.02	239.13	274.37	174.38	215.67	72.85	65.14	66.08	54.3	52.02	119.47	193.02	400.75	295.01	264.47	283.53	113.92	110.31	241.81	175.16	195.42		CG1572	60.06	65.54	213.783	71.6433	227.34		CG1572	6.9	1.25443e-07	6.9	1.08783	0.187264	6.28194e-09
CG1575	8.45	9.53	10.99	8.56	9.77	12.61	10.02	2.58	8.19	11.17	11.57	6.9	9.91	9.2	15.09	13.68	8.31	11.8	6.99	7.12	4.95	6.93	5.46	5.96	11.79	9.89	10.12	7.02	8.56	8.3	6.42	11.84	9.56	6.28		CG1575	9.985	8.405	11.3317	6.235	8.978		CG1575	0.06	0.865908	-0.06	-0.11214	0.287165	0.696162
CG1578	13.69	14.3	16.26	13.47	18.43	21.88	14.33	9.04	13.94	16	17.96	14.36	16.51	18.58	22.48	19.83	16.47	18.16	15.25	10.33	12.69	14.84	10.57	16	14.26	16.59	19.47	17.89	23.85	13.61	11.28	18.42	14.38	12.13		CG1578	16.3383	14.2717	18.6717	13.28	16.188		CG1578	0.39	0.403846	-0.39	-0.180149	0.142218	0.205257
CG1582	6.71	8.86	10.25	7.29	8.7	8.81	7.31	7.38	12.51	10.53	8.22	7.02	8.38	10.72	13.27	10.9	11.07	10.97	8.45	10.11	7.4	7.28	6.29	7.62	12.72	9.62	12.34	14.12	12.55	7.22	5.47	12.75	8.53	11.23		CG1582	8.43667	8.82833	10.885	7.85833	10.655		CG1582	1.07	0.0851534	-1.07	-0.25566	0.117033	0.0289245
CG1598	44.8	40.6	38.89	36.49	40.69	42.31	43.94	24.57	44.69	29.16	48.67	32.3	49.18	42.39	42.56	48.78	42.19	52.69	32.07	35.09	29.07	35.89	26.19	33.36	49.76	50.78	39.87	49.61	44.03	39.8	32.94	52.48	36.82	39.64		CG1598	40.63	37.2217	46.2983	31.945	43.573		CG1598	0.47	0.342054	-0.47	-0.229767	0.165107	0.164035
CG1602	1.68	1.19	0.71	0.29	1.31	0.77	0.59	0.24	1.57	1.19	2.1	0.58	2.72	3.18	1.98	0.93	0.93	3.52	1.36	1.3	1.87	0.49	0.43	0.8	2.2	1.88	1.36	1.33	2.74	0.82	1.42	2.45	0.97	1.83		CG1602	0.991667	1.045	2.21	1.04167	1.7		CG1602	0.38	0.4203	0.38	0.603686	0.489084	0.217084
CG1603	2.26	1.66	1.18	2.23	5.54	3.59	1.19	1.64	4.53	3.1	3.24	1.28	5.34	2.64	2.59	2	4.63	3.45	2.26	1.83	1.7	2.66	0.91	1.48	3.95	2.77	3.09	4.13	2.25	1.77	1.91	5.28	3.82	4.06		CG1603	2.74333	2.49667	3.44167	1.80667	3.303		CG1603	0	0.99556	0	0.00522288	0.363128	0.988524
CG1607	0.69	0.34	0.45	0.63	1.59	0.93	0.82	1.11	0.33	0.55	0.36	0.2	3.17	2.38	1.72	1.18	2.91	3.05	0.22	0.14	0.44	1.04	1.14	3.42	2.77	2.65	5.56	4.72	2.69	2.23	4.84	5.06	6.82	6.08		CG1607	0.771667	0.561667	2.40167	1.06667	4.342		CG1607	1.92	0.0120978	1.92	1.40869	0.472653	0.00287874
CG1620	11.53	16.2	13.58	10.13	25.27	13.45	12.31	9.63	19.08	14.92	18.25	12.21	24.74	26.04	20.92	25.61	20.04	25.83	15.73	13.39	14.68	10.4	7.68	12.92	20.89	23.31	14.79	23.5	24.15	11.8	10.22	25.77	14.73	17.25		CG1620	15.0267	14.4	23.8633	12.4667	18.641		CG1620	0.51	0.311362	0.51	0.192507	0.13218	0.145282
CG1622	5.62	6.39	7.5	5.61	10.8	8.71	4.57	5.42	9.01	6.85	6.5	5.47	5.52	8.14	10.71	12.2	9.78	11.85	9.56	6.48	4.88	5.16	4.13	8.99	11.92	9.6	10.82	8.09	11.93	5.13	3.57	14.39	8.76	6.9		CG1622	7.43833	6.30333	9.7	6.53333	9.111		CG1622	0.06	0.876572	0.06	0.0590314	0.161824	0.71527
CG1628	4.87	4.51	4.73	4.48	4.88	4.04	4.16	2.09	4.64	3.26	5.24	2.64	3.34	3.12	4.1	3.77	2.69	3.05	4.72	3.04	2.25	4.28	2.21	2.45	3.04	3.5	4.84	3.63	3.67	1.94	2.71	5.62	3.55	4.22		CG1628	4.585	3.67167	3.345	3.15833	3.672		CG1628	2.83	0.0014956	-2.83	-0.671534	0.183858	0.000259751
CG1631	0.75	0.05	0.06	0.59	0.95	0.63	0	0.15	2.51	0.32	0.05	0.11	0	3.66	1.43	1.3	2.38	2.12	0.05	0.6	0	0.23	0	0.29	0.36	0.35	0.97	2.02	0.74	0.97	0.52	0.64	0.92	0.78		CG1631	0.505	0.523333	1.815	0.195	0.827		CG1631	0.45	0.358551	0.45	1.21531	0.895638	0.174805
CG1632	2.75	6.45	3.75	1.38	8.96	3.88	1.49	2.52	10.03	4.99	3.22	5.21	0.88	4.17	6.45	6.3	3.17	3.56	2.46	2.89	2.41	1.16	0.81	1.22	0.97	5.42	3.48	3.98	3.89	0.55	1.06	2.38	1.64	1.39		CG1632	4.52833	4.57667	4.08833	1.825	2.476		CG1632	0.6	0.248428	-0.6	-0.697141	0.435222	0.109199
CG1635	5.25	6.82	5.64	5.89	4.78	5.9	6.66	3.99	4.24	5.48	5.29	5.27	5.83	7.62	11.46	9.02	7.73	10.26	5.99	3.79	4.04	4.64	3.88	6.35	8.73	10.69	10.04	6.89	11.21	4.98	4.87	8.73	6.12	9.06		CG1635	5.71333	5.155	8.65333	4.78167	8.132		CG1635	0.13	0.738176	0.13	0.142764	0.21656	0.509745
CG1636	4	4.87	4.49	3.14	4.93	4.26	4.77	4.48	7.48	3.89	5.6	4.04	2.2	3.77	5.68	4.63	6.22	3.95	3.43	3.6	4.07	3.32	1.87	3.62	6.23	6.93	5.31	3.22	6.91	3.02	3.13	3.48	6.08	3.37		CG1636	4.28167	5.04333	4.40833	3.31833	4.768		CG1636	3.06	0.000875376	-3.06	-0.749906	0.196971	0.000140553
CG1637	4.57	5.56	4.31	5.24	5.41	3.34	5.45	7.2	6.2	5.53	6.58	5.02	2.94	6.53	5.04	5.57	5.57	6.04	5.71	9.12	5.26	5.44	4.81	4.14	4.07	9.23	5.12	5.72	5.58	3.46	4.94	5.44	1.82	5.7		CG1637	4.73833	5.99667	5.28167	5.74667	5.108		CG1637	3.65	0.000222517	-3.65	-0.789086	0.188874	2.94293e-05
CG1638	0.89	0.07	0.64	0.08	3.21	0.36	0.25	0.07	2.41	0.62	0.53	0.08	0.14	3.15	0.53	1.95	2.07	2.04	0.36	1.11	0.33	0.41	0	0.31	1.19	0.4	1.39	1.54	0	1.3	0.08	1.94	0	1.21		CG1638	0.875	0.66	1.64667	0.42	0.905		CG1638	0.33	0.464537	0.33	0.852596	0.73691	0.247278
CG1640	14.16	14.34	11.78	15.5	18.62	12.65	18.56	21.05	20.19	10	11.81	10.7	9.86	13.55	16.04	13.54	14.28	9.19	15.72	17.29	10.87	20.91	24.51	13.09	12.73	15.2	12.98	15.37	13.73	19.15	15.92	13.46	7.44	21.33		CG1640	14.5083	15.385	12.7433	17.065	14.731		CG1640	2.38	0.00412665	-2.38	-0.875939	0.262061	0.000830264
CG1646	22.63	29.8	25.81	19.69	37.76	33.58	18.16	14.51	38.57	31.57	30.39	22.33	33.88	31.03	37.83	42.44	42.22	35.29	31.61	19.41	21.86	21.83	14.67	29.94	34.88	23.6	46.91	42.32	45.73	26.87	25.13	48.29	25.04	25.88		CG1646	28.2117	25.9217	37.115	23.22	34.465		CG1646	0	0.989669	0	-0.00509279	0.158581	0.97438
CG1647	4.94	5.88	3.44	3.65	8.01	6.58	4.79	2.93	6.91	4.86	5.6	3.82	6.76	10.79	9.91	8.82	9.9	11.86	6.63	6.34	4.06	3.37	3.03	7.2	9.22	8.6	10.04	7.06	10.17	7.24	4.31	7.93	8.95	7.23		CG1647	5.41667	4.81833	9.67333	5.105	8.075		CG1647	2.69	0.00203544	2.69	0.457677	0.12851	0.00036886
CG1648	23.65	18.41	30.79	33.86	25.26	23.12	30.5	16.89	8.53	22.97	17	24.12	75.65	38.67	47.69	47.29	66.24	91.38	19.57	14.59	18.09	26.91	20.8	58.1	80.12	78.89	81.29	64.53	59.77	52.19	50.51	78.7	62.41	67.22		CG1648	25.8483	20.0017	61.1533	26.3433	67.563		CG1648	1.49	0.0326986	1.49	0.978996	0.376302	0.00927834
CG1657	1.91	2.25	2.14	1.43	1.52	2.55	1.08	1.67	2.29	2.25	2.93	1.56	6.1	7.42	9.16	8.37	10.21	9.76	2.19	1.92	1.6	1.58	1.31	5.81	5.62	10.96	14.45	11.96	12.08	2.25	4.09	12.38	3.66	8.69		CG1657	1.96667	1.96333	8.50333	2.40167	8.614		CG1657	15.3	5.06168e-16	15.3	1.5568	0.180607	6.70672e-18
CG1662	22.55	26.69	25.05	20.99	19.41	24.42	21.86	17.25	17.82	14.88	14.24	18.58	17.79	7.93	11.61	10.82	14.45	17.85	15.67	17.18	14.54	20.97	16.53	13.15	18.63	14.37	12.53	11.57	12.97	9.93	17.64	19.54	13.18	12.96		CG1662	23.185	17.4383	13.4083	16.34	14.332		CG1662	2.34	0.00458079	-2.34	-0.950434	0.287266	0.000937821
CG1663	1.17	0.99	0.63	1.22	4.61	1.71	0.97	0.82	3.21	1.29	0.96	0.87	1.35	2.81	1.79	3.45	2.02	1.13	2.8	1.36	1.3	1.79	0.53	0.9	2.57	0.69	0.64	5.24	1.69	3.96	1.05	1.98	0.32	2.57		CG1663	1.72167	1.35333	2.09167	1.44667	2.071		CG1663	0.04	0.909951	0.04	0.105482	0.378157	0.780293
CG1665	35.6	38.89	31.95	21.99	49.3	38.01	27.06	23.06	49.77	26.78	42.95	36.34	57.58	135.07	151.79	123.43	105.62	113.11	47.98	34.91	31.21	27.51	25.09	35.72	66.53	157.09	122.3	91.12	107.82	42.17	27.44	81.66	66.88	56.41		CG1665	35.9567	34.3267	114.433	33.7367	81.942		CG1665	7.74	1.82457e-08	7.74	1.1637	0.189109	7.57499e-10
CG1667	3.18	5.95	4.49	2.52	14.49	3.4	5.3	7.29	14.12	4.09	4.44	4.22	5.65	15.34	16.12	12.77	9.66	5.65	8.24	7.19	4.09	6.17	6.49	6.24	7.22	12.19	12.22	12.92	12.95	8.05	5.52	11.78	5.62	10.75		CG1667	5.67167	6.57667	10.865	6.40333	9.922		CG1667	0.08	0.834531	0.08	0.158963	0.344826	0.644802
CG1671	7	6.69	9.57	7.31	7.85	8.28	8.64	3.9	10.12	9.06	10.53	4.42	8.87	8.76	11.7	12.15	8.88	7.88	6.44	4.84	4.85	7.93	3.79	7.14	8.93	11.05	12.94	9.73	8.53	4.42	6.1	8.96	7.65	6.78		CG1671	7.78333	7.77833	9.70667	5.83167	8.509		CG1671	0.26	0.548912	-0.26	-0.208565	0.206924	0.313488
CG1673	61.54	72.36	77.48	74.39	119.74	133.28	72.96	53.16	48.98	114.62	70.37	91.99	35.62	31.02	35.46	36.96	38.74	65.05	73.21	39.54	80.47	72.04	64.43	75.85	39.34	30.78	34.47	30.76	37.2	34.14	43.79	38.6	22.09	27.61		CG1673	89.7983	75.3467	40.475	67.59	33.878		CG1673	5.4	3.96488e-06	-5.4	-1.48292	0.289754	3.09011e-07
CG1674	23.19	31.4	31.98	34.98	44.88	21.3	34.04	31.73	10.36	45.69	19.71	56.22	4.65	1.99	1.52	1.25	2.16	9.48	33.74	19.12	37.36	26.46	27.35	37.92	7.25	1.37	2.17	1.46	1.16	17.18	33.14	4.64	5.53	11.13		CG1674	31.2883	32.9583	3.50833	30.325	8.503		CG1674	8.51	3.08456e-09	-8.51	-3.6826	0.570502	1.08204e-10
CG1677	1.09	1.12	1.28	0.96	1.89	1.44	0.97	0.9	1.7	1.27	1.26	1.06	1.32	2.29	2.4	2.41	2.47	2.08	1.37	1	1.05	1	0.81	1.61	1.62	1.67	2.31	2.67	2.76	1.12	1.11	2.05	1.86	1.4		CG1677	1.29667	1.19333	2.16167	1.14	1.857		CG1677	1.63	0.0233018	1.63	0.293581	0.107366	0.00624937
CG1688	0.14	0.13	0.12	0.17	0.15	0.11	0.08	0.12	0.09	0.08	0.09	0.06	0.14	0.14	0.04	0.06	0.17	0.09	0.02	0.21	0.11	0.21	0.06	0.11	0.05	0.02	0.11	0.26	0.15	0.11	0.15	0.04	0.36	0.09		CG1688	0.136667	0.0866667	0.106667	0.12	0.134		CG1688	0.14	0.716864	-0.14	-0.274824	0.392129	0.483397
CG1690	2.37	0.9	2.13	1.35	14.14	1.4	0.58	0.1	21.17	1.58	1.03	0	1.14	12.96	1.21	7.35	12.58	10.22	1.65	6.2	0.61	1.63	0.07	0.71	6.74	0	0.9	11.33	1.16	3.51	1.98	8.07	1.92	4.68		CG1690	3.715	4.07667	7.57667	1.81167	4.029		CG1690	0.1	0.788408	0.1	0.533634	0.94754	0.573314
CG1695	0.32	0.15	0.27	0.6	0.68	0.77	0.22	0.19	0.2	0.53	0.23	0.07	0.43	0.63	0.43	0.28	0.56	0.42	0.03	0.13	0.36	0.51	0.23	0.89	0.42	0.25	0.83	0.47	0.71	0.34	0.17	0.15	1.22	0.09		CG1695	0.465	0.24	0.458333	0.358333	0.465		CG1695	0.23	0.587269	0.23	0.373769	0.398833	0.348678
CG1698	0.68	1.03	0.96	1.14	0.63	0.81	0.66	1.03	0.1	0.44	0.48	0.49	1.12	0.38	0.16	0.09	0.58	0.38	0.21	1.65	0.73	1.78	0.43	0.69	0.19	0.17	0.29	0.88	0.32	0.59	0.75	0.17	1.28	0.71		CG1698	0.875	0.533333	0.451667	0.915	0.535		CG1698	0.38	0.421326	-0.38	-0.802205	0.650978	0.217834
CG1701	0	0.23	0	0.14	0	0	0	0	0	0	0	0	0	0	0	0.84	0	0.33	0	0	0	0	0	0	0	0	0	0.53	0.45	0	0	0	0	0		CG1701	0.0616667	0	0.195	0	0.098		CG1701	0	NA	0	1.1764	1.35064	0.383757
CG1703	82.76	81.3	92.51	85.17	63.69	103.71	74.91	45.7	68.95	68.35	83.41	62.84	108.03	80.65	95.24	89.46	79.38	75.22	72.3	54.03	49.48	66.27	56.9	73.66	91.78	69.06	91.13	81.03	89.18	67.62	69.92	101.59	71.23	64.14		CG1703	84.8567	67.36	87.9967	62.1067	79.668		CG1703	0.22	0.607253	-0.22	-0.160108	0.178227	0.369006
CG1718	0.59	0.94	0.65	1.25	0.78	0.97	0.9	2.44	1.57	0.74	0.63	0.48	1.19	1.03	0.82	0.97	0.61	0.63	0.55	3.43	1.47	0.82	1.97	0.54	0.75	0.84	1.08	1.18	1.33	0.81	0.93	1.31	1.18	1.95		CG1718	0.863333	1.12667	0.875	1.46333	1.136		CG1718	1.04	0.0914649	-1.04	-0.944777	0.439426	0.0315531
CG1722	1.84	1.8	1.82	2.67	3.5	2.31	1.57	0.63	7.95	1.6	2.05	1.17	6.91	4.26	3.27	5.28	6.25	4.9	2.45	1.69	1.66	2.59	0.89	2.98	6.49	7.69	5.21	7.75	4.99	4.68	1.83	5.31	4.83	5.82		CG1722	2.32333	2.495	5.145	2.04333	5.46		CG1722	0.43	0.370536	0.43	0.622694	0.467088	0.182486
CG1724	1.22	0.27	0	0	5.57	0.74	0	0	11.4	0.32	0	0	0	6.66	0.18	2.21	7.5	7.61	1.48	2.69	0	0	0	0.42	0	0.41	1.72	3.59	0.27	0	0	2.81	1.54	0		CG1724	1.3	1.95333	4.02667	0.765	1.034		CG1724	0.08	0.838659	0.08	0.564317	1.24734	0.650969
CG1737	10.4	13.5	11.58	9.22	14.23	13.89	8.04	6.86	11.1	12.12	13.63	9.98	17.7	16.29	18.01	16.78	14.69	15.55	14.79	7.66	9.71	8.27	8.36	15.39	14.96	14.7	22.87	15.64	19.97	9.81	9.55	19.35	11.5	12.08		CG1737	12.1367	10.2883	16.5033	10.6967	15.043		CG1737	0.22	0.609327	0.22	0.135767	0.15174	0.370929
CG1738	6.42	7.59	11.26	9.12	15.07	8.15	11.5	5.37	9.76	9.04	9.17	8.17	5.97	11.72	15.17	14.43	16.37	8.67	11.57	5.26	2.35	7.42	10.11	6.95	10.55	18.28	13.88	19.62	12.64	6.77	7.35	13.36	11.76	7.67		CG1738	9.60167	8.835	12.055	7.27667	12.188		CG1738	0.1	0.793742	-0.1	-0.131105	0.238137	0.581944
CG1750	12.48	13.72	11.88	11.73	6.86	14.47	13.18	7.16	7.65	7.48	11.2	8.04	7.68	6.85	11.3	8.33	7.29	11.7	7.54	6.03	6.06	12.33	4.09	6.63	14.76	8.44	6.47	4.95	8.59	10.22	6.51	7.16	5.09	11.21		CG1750	11.8567	9.11833	8.85833	7.11333	8.34		CG1750	1.43	0.0371077	-1.43	-0.631931	0.247831	0.010777
CG1764	3.58	4.91	5.95	3.28	8.32	6.2	3.26	5.44	8.43	5.65	4.85	4.63	4.58	8.65	10.03	10.73	9.31	10.01	6.97	5.68	4.07	3.79	3.23	6.38	7.17	9	12.43	10.28	12.28	4.19	3.13	11	5.85	5.79		CG1764	5.37333	5.37667	8.885	5.02	8.112		CG1764	0.16	0.699	0.16	0.147182	0.200852	0.463686
CG1773	1.68	0.65	0.42	0.67	1.12	1.42	1.15	0.93	2.11	0.36	1.26	1.39	0.91	48.81	4.03	3.35	5.47	4.11	1.71	0.78	0	1.13	1.96	0.95	0.68	10.79	0.49	0	1.05	2.52	1.63	0.6	3.21	2.2		CG1773	0.993333	1.2	11.1133	1.08833	2.317		CG1773	0	NA	0	2.39266	0.730922	NA
CG1774	56.59	39.89	48.53	43.09	38.83	45.35	47.81	35.32	44.36	34.07	60.61	32.17	43	34.27	39.65	40.29	38.72	36.26	38.88	32.92	24.11	47.31	29.37	32.36	42.54	35.54	40.32	35.96	26.7	30.61	35.97	34.59	32.37	32.76		CG1774	45.38	42.39	38.6983	34.1583	34.736		CG1774	3.4	0.000400688	-3.4	-0.679578	0.168953	5.76379e-05
CG1785	15.85	15.3	22.15	16.58	15.79	21.53	17.05	9.85	21.07	13.34	20.51	10.45	17.25	13.19	18.72	23.32	16.09	13.96	16.04	8.5	8.39	16.63	10.29	11.77	22.35	18.63	23.2	16.14	21.18	15.73	11.6	19.02	25.48	14.84		CG1785	17.8667	15.3783	17.0883	11.9367	18.817		CG1785	0.96	0.110874	-0.96	-0.380572	0.18512	0.0398006
CG1789	35.04	44.87	33.84	39.53	50.44	48.19	33.39	23.81	29.53	38.18	37.71	29.05	47.52	39.8	48.64	49.28	45.28	44.29	34.28	24.57	28.37	28.98	26.5	30.74	48.08	35.97	32.17	41.46	36.86	24.13	25.18	41.57	29.63	22.43		CG1789	41.985	31.945	45.8017	28.9067	33.748		CG1789	0.05	0.894053	-0.05	-0.0497656	0.15383	0.74631
CG1791	0	0	0	0	0	0	0	0	0	0.19	0	0	0	0	0.22	0	0	0	0	0	0	0	0	0	0	0	0	0	0	0	0	0	0	0		CG1791	0	0.0316667	0.0366667	0	0		CG1791	0	NA	0	-0.0342504	1.34851	0.979737
CG1792	5.82	4.77	2.88	3.23	4.21	6.66	2.46	4.55	7.51	3.83	5.82	3.4	7.15	7.22	9.39	7.4	7.4	10.56	3.99	3.62	3.49	2.67	2.47	4.43	4.82	5.48	5.97	5.8	6.58	4.6	4.94	3.48	2.11	6.16		CG1792	4.595	4.595	8.18667	3.445	4.994		CG1792	0.43	0.371964	0.43	0.29281	0.220166	0.183534
CG1801	1.78	1.69	1.69	1.68	2.36	2.17	1.8	1.36	3.53	1.65	2.06	1.45	2.32	2.92	3.04	3.24	2.98	3.09	2.24	1.79	1.62	2.08	1.56	1.5	3.1	3.6	3.4	4.5	3.06	2.33	1.7	3.05	2.48	2.96		CG1801	1.895	1.975	2.93167	1.79833	3.018		CG1801	0.03	0.930092	0.03	0.0326869	0.143753	0.820127
CG1806	0.64	0.96	0.52	1.28	0.97	1.05	0.87	0.61	0.27	0.59	0.61	0.77	0.96	0.97	0.96	0.9	0.74	0.46	0.66	1.12	1.46	1.94	1.7	1.28	0.6	0.88	1.18	1.66	1.43	0.8	1.55	0.69	0.12	0.87		CG1806	0.903333	0.62	0.831667	1.36	0.978		CG1806	0.09	0.811318	-0.09	-0.1969	0.382704	0.606904
CG1809	26.14	9.5	4.7	32.99	4.27	3.19	14.81	29.78	16.83	1.23	27.56	0.93	7.05	0.87	0.86	0.65	1.74	1.66	0.17	47.78	17.12	29.16	23.53	3.73	3.64	0.85	1.04	0.2	1.08	32.32	16.22	3.27	0.58	22.23		CG1809	13.465	15.19	2.13833	20.2483	8.143		CG1809	3.11	0.000780713	-3.11	-2.97085	0.773951	0.000123763
CG1812	2.08	3.39	3.17	2.67	4.59	3.47	2.55	2.73	5.07	3.81	2.54	2.65	2.81	5.9	5.49	5.84	7.93	6.45	4.15	3.5	3.73	2.54	1.73	4.74	5.56	7.18	7.5	7.9	7.37	3.42	3.84	4.8	4.31	6.36		CG1812	3.22833	3.225	5.73667	3.39833	5.824		CG1812	0.4	0.401884	0.4	0.26704	0.210285	0.204123
CG1814	16.55	18.5	17.79	15.68	16.4	18.93	14.78	15.83	19.86	18.32	20.7	15.09	22.2	29.08	30.42	31.4	26.71	27.27	17.48	16.28	15.45	16.03	15.47	17.67	24.57	25.07	29.02	25.65	25.44	19.18	13.38	23.58	18.21	18.44		CG1814	17.3083	17.43	27.8467	16.3967	22.254		CG1814	0.4	0.393951	0.4	0.104261	0.081164	0.198943
CG1815	2.06	3.08	2.15	1.47	2.8	2.33	1.65	2.64	5.24	3.43	2.72	1.9	3.06	6.62	6	6.48	4.68	3.83	2.88	2.27	2.38	2.16	2.16	2.5	3.81	6.1	4.74	6.22	5.96	1.96	2.19	2.63	2.25	3.23		CG1815	2.315	2.93	5.11167	2.39167	3.909		CG1815	0.29	0.508424	0.29	0.256435	0.23765	0.280569
CG1824	6.75	5.48	4.32	5.74	4.11	5.5	8.13	4.23	3.02	3.75	6.75	2.72	5.59	4.37	5.8	4.47	2.39	5.23	4.84	4.95	4.38	7.49	6.02	3.09	5.59	4.42	4.24	3.37	3.29	6.9	4.94	4.63	5.91	4.56		CG1824	5.31667	4.76667	4.64167	5.12833	4.785		CG1824	0.69	0.203627	-0.69	-0.607114	0.352186	0.0847365
CG1827	9.42	14.4	7.98	4.75	16.33	13.39	6.9	7.48	17.4	11.6	14.67	10.49	6.67	28.26	29.43	24.57	20.11	24.96	16.72	9.97	11.78	6.94	6.85	10.21	8.17	21.69	19.13	16.04	20.42	6.47	4.93	13.75	5.23	10.93		CG1827	11.045	11.4233	22.3333	10.4117	12.676		CG1827	0.52	0.302626	0.52	0.403359	0.273099	0.139685
CG1835	0.38	0.34	0.37	0.47	1.93	0.26	0.29	0.17	3.18	0.24	0.21	0.27	0.71	2.23	0.65	1.64	1.45	1.83	0.31	1.13	0.34	0.58	0.06	0.21	0.55	0.24	0.99	2.53	1.69	0.41	0.48	0.92	1.59	0.75		CG1835	0.625	0.726667	1.41833	0.438333	1.015		CG1835	0.22	0.602986	0.22	0.57321	0.631984	0.364407
CG1840	47.57	44.52	62.56	44.66	41.85	53.45	54.89	47.15	80.71	42.91	67.9	36.26	101.71	75.5	88.54	106.19	67.65	72.22	57.61	41.46	43.65	40.23	44.13	35.16	108.55	107.42	71.78	82.35	85.77	61.36	43.9	115.97	89.63	85.59		CG1840	49.1017	54.97	85.3017	43.7067	85.232		CG1840	0.1	0.79289	0.1	0.106613	0.192965	0.580606
CG1847	5.85	10.93	5.13	3.57	11.16	6.28	6.65	7.3	12.67	11.37	4.98	6.01	2.15	8.59	9.36	8.23	9.42	9.55	8.44	6.59	6.95	6.35	1.96	2.96	7.54	10.92	13.74	9.89	9.76	4.74	3.15	11.27	5.02	9.2		CG1847	7.15333	8.16333	7.88333	5.54167	8.523		CG1847	0.95	0.112843	-0.95	-0.629574	0.307599	0.0406839
CG1850	0.13	0	0.39	0.61	0.37	0.13	0.13	0	0.09	0.06	0.19	0.11	1.29	1.04	1.92	1.2	0.96	1.62	0.36	0.19	0.42	0.41	0	0.22	0.43	1.07	0.4	1.19	0.48	0.19	0	0.41	0.13	0.22		CG1850	0.271667	0.0966667	1.33833	0.266667	0.452		CG1850	7.68	2.10169e-08	7.68	3.08861	0.504013	8.89687e-10
CG1882	23.57	18.71	11.03	12.67	15.26	9.01	11.45	17.06	21.08	10.94	12.96	9.14	16.39	22.1	17.87	24.55	23.37	27.26	13.13	22.58	13.72	14.29	9.81	11.43	15.99	30.18	21.38	22.25	19.35	15.24	13.3	16.2	16.18	16.59		CG1882	15.0417	13.7717	21.9233	14.16	18.666		CG1882	0.08	0.829067	0.08	0.0976587	0.206481	0.636236
CG1885	3.78	2.54	2.95	3.66	3.09	2.26	1.83	3.08	4.96	2.81	3.08	4.96	4.18	6.75	5.2	5.15	6.47	7.7	3.07	3.12	2.11	3.96	1.65	4.5	3.28	4.92	7.61	8.54	6.44	3.69	2.09	6.81	3.79	5.02		CG1885	3.04667	3.45333	5.90833	3.06833	5.219		CG1885	0.16	0.692743	0.16	0.198842	0.267286	0.456918
CG1888	1.26	2.22	1.78	1.27	2.51	1.83	1.43	3.13	2.23	1.4	1.98	1.9	2.35	1.76	2.35	1.75	2.11	1.58	2.1	2.44	2.24	1.32	1.38	1.71	3.2	1.83	1.71	1.93	1.41	1.92	1.39	2.49	1.36	1.13		CG1888	1.81167	2.01167	1.98333	1.865	1.837		CG1888	1.01	0.09801	-1.01	-0.613294	0.289792	0.0343172
CG1889	0	0.23	0.14	0.17	0.34	0.05	0.06	0	0	0.08	1.2	0.3	0	0	0.09	0	0	0	0.58	0.3	0.21	0.21	0.32	0.16	0	0	0	0.93	0	0.17	0.5	0	0	0.41		CG1889	0.155	0.273333	0.015	0.296667	0.201		CG1889	1	0.100867	-1	-2.68203	1.27625	0.0355986
CG1890	45.3	79.87	86.18	37.14	109.69	51.96	85.52	70.21	149.05	58.39	80.73	41.96	288.38	284.22	368.52	296.98	265.96	166.8	129.63	53.16	45.07	68.43	78.22	122.17	321.83	442.35	360.62	395.48	305.45	195.2	169.51	301.39	379.27	274.63		CG1890	68.3567	80.9767	278.477	82.78	314.573		CG1890	5.2	6.25051e-06	5.2	1.25347	0.249706	5.17301e-07
CG1894	1.91	0.3	0.84	1.55	2.34	0.72	1.94	0	2.93	0	2.28	0	3.48	0.62	0.41	0.34	2.96	1.57	0.25	2.11	0.19	0.28	0	0.12	0.69	0	0.43	3.67	2.9	1.3	1.14	3.28	0	0.58		CG1894	1.27667	1.19167	1.56333	0.491667	1.399		CG1894	0.01	0.976327	0.01	0.0733198	1.01253	0.942274
CG1896	610.39	736.82	719.13	640.67	622.35	867.88	506.4	473.79	527.09	577.16	541.12	568.94	648.8	597.36	817.15	684.51	645.08	664.82	661.74	509.32	445.66	561.51	502.39	560.18	726.53	663.45	580.1	453.2	548.77	467.71	478.51	671.09	631.55	539.05		CG1896	699.54	532.417	676.287	540.133	575.996		CG1896	0.65	0.224706	-0.65	-0.242136	0.145529	0.0961456
CG1902	9.06	6.8	5.11	8.69	5.72	7.65	6.86	8.53	7.73	4.6	8.35	3.43	5.94	6.43	6.56	7.93	5.83	6.76	4.59	11.01	6.67	8.28	7.48	4.41	7.07	5.38	6.23	5.72	6.39	7.62	4.61	6.54	4.4	8.95		CG1902	7.17167	6.58333	6.575	7.07333	6.291		CG1902	1.36	0.0434522	-1.36	-0.574772	0.231275	0.0129468
CG1907	153.03	137.74	83.1	147.65	92.22	153.95	137.38	93.04	57.4	91.15	118.12	105.25	45.91	47.16	50.07	44.34	44.29	54.94	59.15	121.46	79.91	109.23	92.64	82	57.17	48.69	45.72	42.27	45.26	82.23	95.94	59.26	29.84	88.61		CG1907	127.948	100.39	47.785	90.7317	59.499		CG1907	8.83	1.48032e-09	-8.83	-1.67022	0.254029	4.86835e-11
CG1909	1.15	1.67	0.58	1.1	1.32	0.82	0.5	0.65	0.4	0.96	1.17	0.31	1.07	0.33	0.17	0.68	0.64	0.73	0.72	1.09	0.65	1.2	0.71	1.46	0.21	0.19	0.36	1.66	0.22	0.87	0.94	0.22	0.57	0.42		CG1909	1.10667	0.665	0.603333	0.971667	0.566		CG1909	0.45	0.354532	-0.45	-0.649931	0.475953	0.172084
CG1910	43.51	61.59	57.16	40.82	71.93	60.13	39.3	38.19	73.61	58.42	67.11	43.97	66.26	77.3	80.68	92.77	75.23	60.16	68.49	40.6	42.57	41.49	36.75	54.39	74.92	62.92	84.74	75.6	83.92	47.18	39.49	80.45	58.02	51.99		CG1910	55.8567	53.4333	75.4	47.3817	65.923		CG1910	0.06	0.880888	-0.06	-0.0420012	0.117682	0.721164
CG1924	0.23	0	0.18	0	2.08	0.11	0.02	0	2.56	0.15	0.13	0	0	0.78	0.07	0.12	1.18	0.54	0.37	0.75	0.07	0.1	0	0	0.2	0	0.48	2.16	0.16	0.24	0.03	0.54	0	0.2		CG1924	0.433333	0.476667	0.448333	0.215	0.401		CG1924	0.04	0.902175	-0.04	-0.321145	1.07224	0.764553
CG1927	48.64	39.63	37.98	47.78	25.25	41.38	42.7	40.67	30.65	30.34	32.65	45.19	15.32	18.21	16.09	21.3	16.51	20.31	29.59	47.16	32.5	39.8	41.59	27.91	19.77	21.23	17.65	16.54	18.58	34.06	30.37	19.88	15.06	32.5		CG1927	40.11	37.0333	17.9567	36.425	22.564		CG1927	10.77	1.69444e-11	-10.77	-1.66178	0.228944	3.91459e-13
CG1941	11.48	7.05	1.65	14.16	2.37	6.17	9.38	4.77	2.2	1.52	7.87	0	0.23	0.07	0.15	0	0.14	0.08	0	8.61	2.47	8.83	5.75	1.7	1.4	0	0.3	0.08	0.22	7.48	1.36	0.28	0.61	6.81		CG1941	7.14667	4.29	0.111667	4.56	1.854		CG1941	6.84	1.44281e-07	-6.84	-5.11428	0.884348	7.33316e-09
CG1942	7.8	2.64	1.08	10.17	0.91	8.21	4.85	11	3.1	3.83	3.78	0.08	1.34	0	0	0.11	0.45	0.11	0.08	12.45	9.1	5.28	11.97	1.67	2.21	0.11	0	0	0.43	2.06	4.46	1.11	3.03	3.38		CG1942	5.135	4.44	0.335	6.75833	1.679		CG1942	3.2	0.000627149	-3.2	-3.67478	0.942243	9.61796e-05
CG1943	62.32	80.92	82.06	47.55	98.5	87.1	63.42	56.2	111.75	84.97	96.29	63.8	174.05	195.01	229.18	242.24	175.66	197.12	102.62	68.99	68.66	48.18	48.07	111.34	181.52	270.8	211.92	206.75	209.03	100.01	88.79	213.57	133.05	149.59		CG1943	76.4083	79.405	202.21	74.6433	176.503		CG1943	14.06	8.70926e-15	14.06	0.80772	0.0976539	1.32559e-16
CG1946	0	0	0	0	0	0	0	0	0.55	0	0.12	0	0.96	0	0	0	0.39	0	0	0	0	0	0	0	0	0	0	0	0.12	0	0	0	0	0		CG1946	0	0.111667	0.225	0	0.012		CG1946	0.07	0.857003	0.07	0.560093	1.35495	0.679337
CG1951	1.32	1.22	1.56	1.14	2.89	1.38	2.44	2.1	4.38	1.16	1.07	1.22	3.54	5.2	4.41	3.59	5.86	2.83	1.57	2.04	1.82	2.13	1.55	2.51	3.71	5.78	3.86	2.77	3.72	3	2.88	3.71	4.16	4.4		CG1951	1.585	2.06167	4.23833	1.93667	3.799		CG1951	0.48	0.332586	0.48	0.48291	0.342147	0.158124
CG1958	0.68	1.23	0.48	0.97	9.29	0.87	0	0	17.02	0.75	0.93	0	0	10.43	0.31	2.08	8.43	5.17	1.21	4.05	0.44	1.8	0	0.09	2.34	0.09	0.57	8.63	1.05	1.84	1.24	4.54	2.15	3.04		CG1958	2.25333	3.11667	4.40333	1.265	2.549		CG1958	0.02	0.953415	0.02	0.182195	1.18184	0.877482
CG1965	5.31	6.96	7.14	6.1	7.93	6.8	4.71	3.76	8.43	5.21	7.62	6.38	7.88	9.27	10.66	9.87	10.48	9.08	9.82	6.18	5.34	6.15	5.17	6.29	8.82	8.87	8.48	9.55	12.47	6.17	4.61	8.3	5.22	5.08		CG1965	6.70667	6.01833	9.54	6.49167	7.757		CG1965	0.22	0.602986	0.22	0.117176	0.129202	0.364446
CG1968	5.22	5.09	6.49	5.23	7.34	7.25	3.59	4.82	6.68	5.35	4.71	3.89	7.97	8.62	9.69	9.98	7.9	9.14	6.16	5.34	4.63	4.91	4.34	5.37	10.05	9.61	10.08	7.45	6.47	7	3.97	11.23	3.83	6.65		CG1968	6.10333	4.84	8.88333	5.125	7.634		CG1968	1.06	0.0876703	1.06	0.312459	0.143958	0.0299697
CG1969	28.18	24.4	33.53	29.03	23.47	21.59	33.28	26.51	10.39	28.06	16.04	33.09	12.91	7.59	7.01	9.57	9.5	15.2	32.7	17.46	29.1	26.17	25.76	27.67	13.55	8.69	6.05	7.48	6.43	21.73	29.3	9.54	15.86	18.76		CG1969	26.7	24.5617	10.2967	26.4767	13.739		CG1969	4.63	2.36573e-05	-4.63	-1.85235	0.392044	2.30295e-06
CG1971	1.02	1.05	0.12	0.67	7.22	0.36	0.17	1.13	9.9	1.13	0.44	0.6	0	4.55	1.88	2.08	4.42	3.5	1.82	3.75	0.22	2.17	0.28	0.55	1.48	0.26	0.12	7.11	0.71	1.27	0.99	2.43	1	0.67		CG1971	1.74	2.22833	2.73833	1.465	1.604		CG1971	0.01	0.968649	-0.01	-0.0786595	0.822167	0.92378
CG1979	1.78	2.59	1.14	2.07	7.29	0.93	1.51	1.44	13.81	1.34	0.93	1.47	1.75	9.66	0.6	4.98	7.42	4.77	1.68	5.11	0.96	1.92	0.88	0.53	1.27	0	1.38	7.67	1.35	1.36	1.51	2.47	0.24	2.74		CG1979	2.63333	3.41667	4.86333	1.84667	1.999		CG1979	0.02	0.95078	0.02	0.107901	0.663493	0.870813
CG1983	10.18	15.05	12.69	11.03	12.88	9.47	11.01	13.26	14.76	13.12	13.28	9.68	11.71	29.74	23.87	30.01	18.46	18.26	14.94	11.14	10.12	8.4	8.63	9.72	11.27	24.23	20.3	15.91	18.22	6.36	11.66	16.92	12.52	12.62		CG1983	11.8833	12.5183	22.0083	10.4917	15.001		CG1983	0.3	0.506876	0.3	0.216329	0.19992	0.279218
CG1986	0.79	0.23	0.45	0.06	0	0.82	0.04	0	0.18	0.05	0.6	0.05	0.48	0.76	0.19	0.21	1.17	0.69	0	0	0	0.06	0.15	0.73	0.72	0.14	0.2	1.88	0.65	0.49	0	0.08	3.42	0		CG1986	0.391667	0.153333	0.583333	0.156667	0.758		CG1986	0.71	0.196515	0.71	1.33562	0.765265	0.0809321
CG1988	9.14	8.36	6.29	5.37	42.39	6.77	5.24	8.07	65.96	10.35	5.61	4.7	7.33	57.02	11.56	36.67	41.69	33.57	16.39	19.9	5.93	9.54	4.65	6.68	14.27	11.23	14.27	38.78	10.09	12.25	10.79	28.57	9.96	17.51		CG1988	13.0533	16.655	31.3067	10.515	16.772		CG1988	0.17	0.668636	0.17	0.481186	0.610849	0.430853
CG1998	1.56	2.07	1.83	2.32	4.75	2.32	2	1.67	2.78	3.66	1.64	4.35	0.97	6	6.62	6.08	5.84	5.97	1.84	3.25	4.21	1.94	2.01	3.21	2.03	3.76	5.74	3.77	4.86	1.95	2.09	3.28	0.04	0.61		CG1998	2.475	2.68333	5.24667	2.74333	2.813		CG1998	0.17	0.674163	0.17	0.312198	0.400874	0.436101
CG1999	0.98	0.97	0.33	0.38	9.92	0.45	0.14	0	10.86	0.88	0.76	0.14	0.57	4.98	0.4	2.24	7.21	5.3	0.43	2.97	0.31	0.41	0	0.05	0.62	0	0.3	5.97	0	1.43	1.85	3.76	0.51	1.48		CG1999	2.17167	2.13	3.45	0.695	1.592		CG1999	0.06	0.867563	0.06	0.370247	0.958401	0.699262
CG2003	3.89	4.28	5.07	2.83	5.6	6.04	3.17	1.97	6.32	3.17	5.33	4.51	6.86	11.26	14.46	12.46	10.63	9.24	8.21	2.57	3.53	2.85	2.21	4.96	6.73	8.22	10.85	8.1	12.38	3.98	3.77	9.5	5.78	5.04		CG2003	4.61833	4.07833	10.8183	4.055	7.435		CG2003	3.62	0.000240379	3.62	0.859284	0.206672	3.21442e-05
CG2004	35.19	31.82	34.19	24.67	34.42	44.66	27.12	25.45	45.77	31.61	39.48	30.2	37.54	65.3	80.07	75.51	55.81	53.85	47.5	30.63	28.66	32.02	23.03	26.13	35.77	78.17	69.6	52.25	61.06	20.46	19.26	41.61	31.1	39.88		CG2004	34.1583	33.2717	61.3467	31.3283	44.916		CG2004	1.26	0.0549303	1.26	0.315139	0.132209	0.017142
CG2006	17.35	44.95	27.92	20.6	34.1	19.09	27.33	43.75	39.86	36.63	22.45	20.5	44.76	47.76	55.56	44.69	33.72	24.55	38.51	34.86	23.55	27.63	29.74	32.47	49.35	44.39	43.73	43.05	41.93	37.17	37.67	52.29	46.76	40.96		CG2006	27.335	31.7533	41.84	31.1267	43.73		CG2006	0.13	0.734151	-0.13	-0.189839	0.284522	0.504632
CG2010	8.77	8.42	10.48	10.83	6.59	8.94	12.08	7.61	4.01	8.23	9.98	8.82	4.72	4.52	5.7	5.24	4.82	10.85	9.35	5.21	9.15	9.58	7.45	12.53	6.07	5.72	7.02	6.49	7.54	7.94	9.51	7.49	7.2	4.48		CG2010	9.005	8.455	5.975	8.87833	6.946		CG2010	2.31	0.00492937	-2.31	-1.10808	0.337385	0.00102225
CG2016	0.5	1.05	1.7	1.31	1.35	0.43	0.57	0.34	0.21	1.57	2.34	2.4	0.11	0.32	0	0	0.07	0.5	1.15	1.75	1.16	0.26	1.01	0.45	0	0.12	0	0	0	0.76	1.81	0	0	0.76		CG2016	1.05667	1.23833	0.166667	0.963333	0.345		CG2016	2.89	0.00129341	-2.89	-3.10132	0.839261	0.000219626
CG2017	2.26	3.49	1.53	2.85	3.8	2.6	3.09	5.56	5.56	3.94	2.23	2.67	1.71	3.68	4.13	4.02	2.86	3.5	3.94	3.48	3.76	2.91	2.92	4.2	2.22	3.22	3.16	4.51	3.98	3.09	1.51	2.9	2.21	3.06		CG2017	2.755	3.84167	3.31667	3.535	2.986		CG2017	1.68	0.0207798	-1.68	-0.81665	0.293947	0.00546569
CG2021	76.72	97.88	71.84	73.74	78.89	95.79	70.04	49.27	84.66	67.34	82.62	75.81	130.26	99.76	111.23	125.47	92.6	117.23	90.75	49.97	66.74	60.57	48.26	89.06	102.62	125.02	120.51	64.03	99.35	63.17	62.16	95.13	49.97	81.48		CG2021	82.4767	71.6233	112.758	67.5583	86.344		CG2021	0.12	0.763718	0.12	0.100118	0.164048	0.541665
CG2023	2.68	2.74	3.24	2.5	2.46	3	2.54	1.2	4.62	1.44	2.88	1.72	2.9	2.18	2.45	2.71	3.78	2.63	2.69	1.88	0.84	1.63	2.49	1.32	3.3	3.29	2.12	3.3	2.33	3.42	3.91	4.65	1.16	3.63		CG2023	2.77	2.4	2.775	1.80833	3.111		CG2023	0.29	0.512364	-0.29	-0.296563	0.276709	0.283831
CG2034	20.95	17.15	23.88	16.58	29.83	21.02	20.41	13.04	36.3	19.78	25.45	17.57	20.33	32.12	29.38	30.45	32.72	33.68	21.08	23.83	17.15	14.96	13.39	17.69	26.26	27	27.6	28.35	29.96	20.08	10.83	29.5	15.79	26.57		CG2034	21.5683	22.0917	29.78	18.0167	24.194		CG2034	0.16	0.692033	-0.16	-0.10193	0.136573	0.455462
CG2046	36.48	47	44.14	32.6	44.48	39.66	38.1	29.45	52.56	35.41	42.81	21.19	62.95	55.93	49.81	57.49	57.28	63.3	39.34	32.36	26.64	30.53	30.97	29.42	74.15	64.31	53.21	45.15	45.45	41.73	30.34	61.34	54.37	50.99		CG2046	40.7267	36.5867	57.7933	31.5433	52.104		CG2046	0.18	0.660838	0.18	0.129517	0.16155	0.422717
CG2053	0.07	0.64	0.22	0	8.46	0.98	0.15	0.43	5.4	0.28	0.24	0	1.17	5.04	0.32	2.02	4.54	2.73	0.97	0.48	0.1	0.4	0.34	0.25	0	0.12	1.13	3.75	1.13	0.42	1.91	1.67	0	0		CG2053	1.72833	1.08333	2.63667	0.423333	1.013		CG2053	0.25	0.563709	0.25	0.857964	0.873253	0.325858
CG2059	5.56	5.16	4.51	4.8	5.78	5.66	4.85	4.3	4.28	3.42	4.27	3.56	3.12	2.51	2.18	2.18	4.14	3.9	3.74	3.68	2.71	4.87	4.43	4.1	4.26	4.75	1.7	2.94	2.39	2.9	3.36	3.93	3.93	4.15		CG2059	5.245	4.11333	3.005	3.92167	3.431		CG2059	3.33	0.000467296	-3.33	-1.02951	0.258654	6.88386e-05
CG2061	1.78	1.21	1.67	1.66	4.13	2.43	1.65	0.82	3.66	1.61	1.66	1.3	2.48	6.8	4.53	5.56	5.47	5.57	3.05	2.24	1.06	1.58	0.97	1.97	3.61	6.05	4.35	4.93	5.33	2.14	1.2	3.54	2.04	3.03		CG2061	2.14667	1.78333	5.06833	1.81167	3.622		CG2061	2.84	0.00144693	2.84	0.958605	0.261711	0.000249431
CG2063	19.83	20.76	20.01	19.35	27.7	24.38	14.48	14.35	34.35	18.26	21.09	17.83	35.47	30.85	32.88	42.93	27.44	23.46	27.2	18.33	18.56	16.72	20.19	19.93	30.52	36.57	30.74	17.55	23.56	22.96	15.13	26.62	23.47	16.52		CG2063	22.005	20.06	32.1717	20.155	24.364		CG2063	0.18	0.657993	0.18	0.158123	0.1959	0.419574
CG2064	23.9	20.33	11.76	14.99	15.69	21.87	17.11	27.67	19.39	13.71	15.53	12.7	11.17	25.22	35.82	26.9	16.97	23.18	17.31	32.71	19.7	10.89	13.93	12.46	17.9	30.32	29.2	20.51	27.1	18.44	13.46	20.4	11.01	22.42		CG2064	18.09	17.685	23.21	17.8333	21.076		CG2064	0.19	0.642253	-0.19	-0.25066	0.300565	0.404303
CG2065	9.96	6.24	5.74	4.22	3.76	4.91	3.13	6.86	5.41	4.05	4.4	2.55	8.68	7.68	4.75	7.65	6.1	5.8	2.78	6.12	3.9	1.43	2.56	3.26	4.48	7.87	6.71	11.4	4.95	4.56	2.12	8.26	1.53	4.25		CG2065	5.805	4.4	6.77667	3.34167	5.613		CG2065	0.02	0.953611	0.02	0.0471521	0.306989	0.877929
CG2070	3.1	1.99	1.93	1.59	0.19	0	1.32	0	0	0.09	0.37	0.67	0	0	0	0	0.09	0.65	3.22	2.26	0	1.82	0.24	0.23	0.1	0	0.31	0	0	1.84	6.82	1.27	0	1.13		CG2070	1.46667	0.408333	0.123333	1.295	1.147		CG2070	0.45	0.351029	-0.45	-1.69088	1.23153	0.169754
CG2076	32.84	45.78	31.61	31.21	37.36	35.96	29.92	36.62	35.41	36.77	31.92	34.27	23.05	32.63	39.94	38.46	31.11	33.19	30.19	39.88	27.33	24.62	28.84	23.5	32.6	43.43	39.21	29.52	30.26	22.03	27.29	32.8	26.07	29.44		CG2076	35.7933	34.1517	33.0633	29.06	31.265		CG2076	3.58	0.000264951	-3.58	-0.653134	0.158087	3.60422e-05
CG2082	0.71	1.11	0.92	0.9	1.44	1.08	0.86	0.85	1.41	0.88	0.83	0.78	0.77	1.41	0.96	0.84	1.25	1.05	0.83	0.9	1.13	1.16	0.86	1.09	0.89	0.77	0.99	1.25	1.15	0.92	0.85	1.28	0.9	0.73		CG2082	1.02667	0.935	1.04667	0.995	0.973		CG2082	1.18	0.0660125	-1.18	-0.395219	0.171794	0.0214175
CG2091	13.17	9.58	11.37	11.1	13.3	17.34	6.6	11.7	13.19	10.28	11.32	7.52	14.25	16.71	20.74	16.99	14.2	14.03	12.61	9.35	10.22	8.82	4.12	8.23	10.66	19.58	13.78	14.43	17.96	7.43	6.58	12.48	14.01	10.94		CG2091	12.6433	10.1017	16.1533	8.89167	12.785		CG2091	0.11	0.77163	0.11	0.10852	0.182313	0.551681
CG2100	11.08	12.24	13.75	9.23	16.56	13.97	13.1	6.69	17.29	10.52	11.99	8.27	5.9	12.71	19.47	14.73	18.55	17.62	13.19	8.8	6.41	7.32	6.02	9.72	18.37	16.84	12.99	12.14	13.64	8.52	10.19	17.22	8.4	9.3		CG2100	12.805	11.31	14.83	8.57667	12.761		CG2100	0.15	0.702575	-0.15	-0.168785	0.232388	0.467652
CG2104	0	0	0	0	0.12	0	0	0	0.26	0	0	0	0	0.39	0	0.18	0.09	0.39	0	0.36	0	0	0	0	0.03	0	0	0.22	0	0	0	0.12	0	0		CG2104	0.02	0.0433333	0.175	0.06	0.037		CG2104	0.23	0.584295	0.23	1.18208	1.25383	0.345795
CG2111	0	0	0	0	0	0	0	0	0	0	0	0	0	0.03	0	0	0.02	0	0	0	0	0	0	0	0	0	0	0	0	0	0	0	0	0		CG2111	0	0	0.00833333	0	0		CG2111	0	NA	0	0.38191	1.34851	0.777017
CG2113	1.04	1.51	0.32	0.44	7.46	0.94	0.55	0.5	21.03	1.36	1.28	0.13	0	9.51	0.47	6.55	9.64	6.52	2.67	5.42	0.73	1.15	0	0	4.21	0	0.65	10.14	0.93	2.14	1.46	5.82	0.99	2.85		CG2113	1.95167	4.14167	5.44833	1.66167	2.919		CG2113	0.01	0.971922	0.01	0.0818598	0.960758	0.9321
CG2116	5.05	5.63	4.04	4.21	4.77	5.5	3.48	4.07	3.18	3.76	5.05	3.34	4.42	4.59	5.95	4.94	4.74	4.8	3.77	3.65	3.78	2.47	3.54	3.31	3.97	6.23	4.52	4.38	6.34	3.89	3.67	4.16	5.18	3.42		CG2116	4.86667	3.81333	4.90667	3.42	4.576		CG2116	0.33	0.462573	-0.33	-0.225051	0.193969	0.24595
CG2118	20.23	27.89	31.01	27.83	28.07	29.58	30.18	16.02	21.86	23.93	26.72	21.57	18.38	30.28	34.37	29.58	28.89	30.51	30.91	21.31	24.8	27.14	19.79	25.51	31.77	32.85	31.59	32.45	33.61	19.26	26.3	32.6	16.07	27.34		CG2118	27.435	23.38	28.6683	24.91	28.384		CG2118	0.75	0.179068	-0.75	-0.297535	0.16546	0.0721405
CG2120	1.64	6.27	2.13	2.8	2.76	2.98	1.86	3.41	1.71	1.09	3.04	0.8	1.17	2.17	3.64	2.63	1.82	2.21	1.48	3.11	1.83	3.17	5.91	2.42	2.42	2.88	1.64	3.2	1.97	2.95	3.69	3.07	2.25	3.22		CG2120	3.09667	1.985	2.27333	2.98667	2.729		CG2120	0.27	0.540105	-0.27	-0.416666	0.406915	0.305853
CG2121	0.62	0.65	0.98	0.93	0.5	0.52	0.65	0.96	0.3	0.61	0.86	1.29	0.43	0.63	0.4	0.47	0.42	0.51	0.77	1.26	0.56	0.53	0.84	0.68	0.36	0.2	0.62	0.89	0.58	0.64	0.39	0.42	1.33	0.62		CG2121	0.7	0.778333	0.476667	0.773333	0.605		CG2121	2.59	0.00256108	-2.59	-1.33421	0.382121	0.000480127
CG2124	7.21	6.83	7.25	6.76	7.51	6.3	6.42	3.26	7.4	5.24	8.08	4.18	5.01	4.48	6.24	5.76	4.17	4.74	7.15	4.41	3.37	6.41	3.43	3.79	4.71	5.19	7.56	5.44	5.5	3.01	3.97	9.08	5.31	6.32		CG2124	6.97667	5.76333	5.06667	4.76	5.609		CG2124	3.41	0.000390316	-3.41	-0.721544	0.179077	5.59602e-05
CG2126	10.14	10.8	10.77	10.85	16.48	11.79	9.2	5.7	13.82	9.04	10.03	8.46	8.78	16.39	14.06	12.79	13.8	16.16	12.77	8.84	8.97	9.64	7.63	9.82	13.64	12.37	15.28	9.27	15.53	8.9	8.48	18.3	15.76	11.63		CG2126	11.805	9.375	13.6633	9.61167	12.916		CG2126	0.01	0.98176	-0.01	-0.008338	0.143495	0.953664
CG2127	3.39	2.43	1.63	1.38	31.7	2.61	0.22	1.37	60.2	2.17	0.54	0.08	1.9	35.21	2.71	15	29.21	25.16	3.65	15.07	0.64	3.5	0	0.63	4.67	0.25	3.32	34.52	2.1	7.85	4.44	16.67	0.67	6.87		CG2127	7.19	10.7633	18.1983	3.915	8.136		CG2127	0.07	0.851328	0.07	0.421851	0.987297	0.669176
CG2129	2.49	3.69	2.03	1.16	3.2	2.61	2.04	1.64	9.31	3.12	2.44	1.62	3.08	6.58	5.78	7.57	5.42	6.36	3.72	3.04	2.65	0.63	1.88	2.66	4.76	6.73	7.33	7.86	8.54	1.49	1.63	5.78	6.26	2.26		CG2129	2.53	3.36167	5.79833	2.43	5.264		CG2129	0.21	0.620992	0.21	0.310298	0.356424	0.383979
CG2137	80.45	75.89	76.49	72.35	58.39	103.76	67.27	57.85	77.71	65.89	90.85	68.36	85.89	47.32	61.58	58.12	71.5	77.11	63.83	112.06	61.28	60.37	60.95	52.22	88.26	59.19	52.34	53.8	60.16	73.14	52.94	94.58	57.06	64.13		CG2137	77.8883	71.3217	66.92	68.4517	65.56		CG2137	2.11	0.00777885	-2.11	-0.629292	0.200873	0.00173157
CG2145	44.97	28.87	38.4	46.4	24.24	42.92	33.73	20.41	52.14	23.34	48.46	39.6	15.67	11.8	1.33	4.18	41.99	21.24	27	30.46	23.25	34.28	39.52	27.54	20.45	16.11	5.97	12.7	16.47	22.92	43.32	11.96	3.78	23.62		CG2145	37.6333	36.28	16.035	30.3417	17.73		CG2145	1.7	0.0201219	-1.7	-1.61493	0.578723	0.00526257
CG2147	27.39	36.03	29.59	22.85	39.09	40.97	24.66	14.8	45.09	34.68	31.28	23.66	43.09	51.69	61.45	42.6	54.98	51.94	34.59	31.21	21.51	21.17	18.44	29.31	49.63	69.27	57.74	41.31	38.88	29.58	17.99	54.35	32.8	41.71		CG2147	32.6533	29.0283	50.9583	26.0383	43.326		CG2147	0.7	0.199657	0.7	0.282576	0.162904	0.0828094
CG2150	0.35	0.31	0.11	0.59	2.4	2.64	1.77	0.92	0	2.55	163.88	5.86	0.32	0.21	0	0	0	0.69	0.17	0.23	1.18	2.11	0	0.97	0.2	0.12	0	0	0.63	0	0.39	0.13	0	0		CG2150	1.06667	29.1633	0.203333	0.776667	0.147		CG2150	0	NA	0	-5.33194	1.17957	NA
CG2157	15.73	14.4	12.49	20.85	11.05	7.68	17.25	12.64	13.72	9.87	23.88	16.84	4.36	11.69	9.92	8.23	12.63	12.95	13.93	23.34	11.24	16.63	12.31	8.69	7.17	14.62	9.32	8.71	9.12	9.62	17.22	6.53	7.97	16.32		CG2157	13.7	15.7	9.96333	14.3567	10.66		CG2157	4.39	4.0939e-05	-4.39	-1.24143	0.270069	4.29224e-06
CG2162	3.87	3.86	3.38	3.45	6.96	5.2	3.05	2.6	8.58	2.36	4.34	3.04	5.02	4.47	5.53	4.18	8.45	6.09	5.8	2.67	2.17	3.24	4.22	3.94	4.68	3.88	5.64	5.98	5.35	3.42	4.21	5.58	4.79	5.85		CG2162	4.45333	3.995	5.62333	3.67333	4.938		CG2162	0	0.99964	0	-0.000336947	0.270404	0.999006
CG2182	24.21	23.1	26.09	21.93	24.64	28.89	19.45	20.45	30.5	24.41	31.4	22.04	38.86	42.1	42.49	39.01	41.8	36.52	24.69	22.25	19.25	18.87	20.47	25.8	31	33.48	38.74	40.21	40.08	25.89	22.82	41.87	21.1	28.22		CG2182	24.81	24.7083	40.13	21.8883	32.341		CG2182	0.56	0.276221	0.56	0.147808	0.0961781	0.124339
CG2186	2.22	3.06	3.03	2.85	3.79	4	2.96	2.76	3.62	3.5	4.4	3.13	4.47	6.23	6.48	6.53	6.11	6.57	4.42	2.51	2.73	2.73	3.5	4.67	4.9	4.72	5.55	6.76	6.71	3.41	2.98	7.15	3.39	5.12		CG2186	3.15833	3.395	6.065	3.42667	5.069		CG2186	1.69	0.0204628	1.69	0.269868	0.0969334	0.0053684
CG2187	19.76	14.64	2.16	11.9	1.97	29.08	2.37	7.18	2.69	0.94	12.77	10.9	0.8	0.24	0	0.26	1.09	0.67	2.74	5.53	3.75	4.77	6.56	1.09	1.53	0.47	0	0	0.14	17.58	14.18	1.2	0.2	7.53		CG2187	13.2517	6.14167	0.51	4.07333	4.283		CG2187	5.59	2.55655e-06	-5.59	-3.83694	0.736359	1.88132e-07
CG2199	21.8	24.98	23.24	18.8	28.53	29.82	20.32	10.75	21.74	22.93	33.01	17.45	32.49	23.53	35.38	33.69	28.9	28.57	21.13	17.23	14.59	16.61	12.68	23.05	29.41	20.87	32.8	30.68	38.71	16.89	16.88	37.39	27.62	20.53		CG2199	24.5283	21.0333	30.4267	17.5483	27.178		CG2199	0	0.995188	0	0.00337169	0.199778	0.986535
CG2200	59.76	57.67	39.95	48.35	56.62	52.19	49.86	49.87	55	39.39	47.52	50.7	49.74	81.17	88.57	77.68	65.55	82.75	65	71.55	43.07	55.17	50.19	43.75	71.92	80.52	74.4	58.2	74.35	62.35	50.93	58.16	23.05	57.41		CG2200	52.4233	48.7233	74.2433	54.7883	61.129		CG2200	0	0.998386	0	0.000903406	0.160258	0.995502
CG2201	1.53	1.63	0.91	1.43	1.7	0.98	1.01	0.66	2.48	0.92	1.6	0.7	2.11	6.31	4.06	3.99	4.25	3.12	1.01	1.07	1.44	1.12	1.22	3.09	1.86	3.73	4.37	6.62	3.96	2.65	2.98	4.27	1.68	3.31		CG2201	1.36333	1.22833	3.97333	1.49167	3.543		CG2201	3.83	0.000146606	3.83	1.17409	0.273989	1.82598e-05
CG2202	6.32	6.44	6.67	4.65	4.85	7.72	5.09	1.82	9.31	4.94	7.54	4.72	7.35	9.53	11.04	8.17	8.89	9.27	6.89	5.15	3.16	4.55	3.29	6.52	7.62	7.51	11.16	14.77	8.61	6.1	4.49	8.74	10.52	5.74		CG2202	6.10833	5.57	9.04167	4.92667	8.526		CG2202	0.19	0.642918	0.19	0.192855	0.231599	0.405007
CG2209	0.41	0.53	0	0.19	1.17	0.21	0.07	0	4.21	0	0.08	0	0	2.7	0.41	0.9	2.77	2.7	0	0.83	0	0	0	0.12	0	0	0.11	2.96	0.76	0	0	2.63	0	0		CG2209	0.418333	0.726667	1.58	0.158333	0.646		CG2209	0.11	0.779164	0.11	0.642419	1.10499	0.560986
CG2211	2.69	2.75	4.69	3.23	7.48	3.21	2.47	4.74	8.42	2.8	4.91	3.91	5.46	10.81	7.7	11.51	8.33	9.84	7.83	5.08	2.15	1.93	1.01	1.77	6.45	13.37	8.9	6.93	6.44	4.32	2.53	7.17	0.46	3.92		CG2211	4.00833	4.54167	8.94167	3.295	6.049		CG2211	0.65	0.225831	0.65	0.421589	0.253861	0.0967724
CG2217	0.13	0.45	0.21	0.45	1.43	0.26	0.14	0.57	1.17	0.87	0.27	0.16	0	0.78	0.67	0.89	3.67	0.98	0.22	2.6	0.58	0.37	0.12	1.06	1.76	1.18	1.09	6.55	2.51	1.32	0.9	0.7	0.04	0.87		CG2217	0.488333	0.53	1.165	0.825	1.692		CG2217	0.15	0.715035	0.15	0.513515	0.72951	0.481484
CG2218	6.01	6.3	9.25	6.44	11.44	8.97	7.28	7.66	15.16	6.94	9.68	5.72	9.04	19.49	16.68	22.31	19.11	16.59	8.15	7.92	9.13	7.28	5.15	9.61	8.51	15.61	18.1	21.44	19.17	8.38	6.38	17.34	15.35	12.11		CG2218	8.06833	8.74	17.2033	7.87333	14.239		CG2218	1.12	0.0750938	1.12	0.424736	0.189325	0.0248697
CG2224	3.44	5.48	5.63	3.62	9.45	5.69	3.29	2.19	6.8	4.58	4.57	4.38	10.18	8.95	12.17	7.23	12.06	13.82	4.63	5.6	4.55	3.11	3.89	8.07	10.34	11.53	9.78	15.14	9.07	5.2	6.06	11.06	7.25	6.98		CG2224	5.55167	4.30167	10.735	4.975	9.241		CG2224	2.71	0.00196456	2.71	0.790468	0.221266	0.000353612
CG2225	1.19	2.18	1.53	1.18	3.82	2.21	1.46	1.46	3.13	2.4	1.88	1.7	2.49	4.6	4.78	4.21	4.03	3.17	2.39	1.6	1.29	1.58	1.17	3.01	2.99	2.74	4.29	3.9	5.2	1.98	1.86	4.43	2.31	3.17		CG2225	2.01833	2.005	3.88	1.84	3.287		CG2225	1.33	0.0462796	1.33	0.397249	0.161535	0.0139245
CG2233	347.5	211.5	294.22	240.52	139.15	213.03	311.55	183.53	297.09	134.67	362.67	247.75	88.47	340	42.47	43.79	261.89	109.12	213.18	229.6	178.08	279.43	219.33	136.2	149.69	213.79	41.68	107.67	110.44	196.26	275.11	54.16	35.19	170.23		CG2233	240.987	256.21	147.623	209.303	135.422		CG2233	1.59	0.0256218	-1.59	-1.31958	0.489398	0.00701059
CG2246	10.03	8.14	7.71	7.29	8.14	7.17	6.13	9.2	9.07	7.51	8.37	7.42	9.27	11.39	9.8	13.78	9.55	8.53	6.93	8.62	9.07	6.74	6.58	6.6	8.35	14.53	11.09	9.56	9.42	6.91	6.89	7.52	4.03	8.7		CG2246	8.08	7.95	10.3867	7.42333	8.7		CG2246	0.34	0.456293	-0.34	-0.204657	0.174629	0.241215
CG2247	7.64	7.83	8.67	8.3	18.86	8.08	5.07	4.21	21.98	7.05	7.88	5.03	7.5	14.31	14.72	13.5	16.01	10.58	8.91	9.99	5.1	7.11	3.34	7.16	12.86	8.38	9.99	17.94	13.89	9.47	9.57	13.12	7.34	8.28		CG2247	9.89667	8.53667	12.77	6.935	11.084		CG2247	0.06	0.87888	0.06	0.108799	0.301791	0.718466
CG2254	58.72	50.09	34.85	71.32	18.49	59.82	52.52	44.41	29.07	22.42	51.99	32.35	12.9	2.83	2.07	1.98	8.61	6.69	17.27	74.63	33.23	54.06	55.64	13.25	13.76	3.17	2.81	3.45	5.57	37.1	22.78	10.44	3.48	38.89		CG2254	48.8817	38.7933	5.84667	41.3467	14.145		CG2254	7.64	2.28669e-08	-7.64	-3.1321	0.512425	9.81987e-10
CG2256	0.16	0.11	0.15	0.05	0	0.1	0	0	0	0.17	0.07	0.18	0.15	0.24	0.14	0.37	0.18	0.26	0.1	0	0.09	0.02	0	0.06	0.05	0.32	0.15	0.28	0.14	0.09	0	0.37	1.01	0		CG2256	0.095	0.07	0.223333	0.045	0.241		CG2256	0.33	0.471993	0.33	0.926159	0.809195	0.252399
CG2258	3.77	4.3	5.21	2.36	5.76	5.71	3.98	3.2	6.82	4.98	5.14	3.76	8.15	12.65	13.41	10.52	10.73	9.99	5.89	3.44	4.72	3.15	2.96	6.87	7.97	10.31	12	12.22	14.01	4.88	3.6	10.23	5.66	6.09		CG2258	4.51833	4.64667	10.9083	4.505	8.697		CG2258	8.25	5.60847e-09	8.25	0.683381	0.107558	2.10361e-10
CG2260	10.95	13.43	11.65	12.73	13.43	17.29	12.53	4.36	9.82	12.23	13.25	8.28	14.09	10.5	17.78	15.18	11.03	16.76	6.92	8.13	6.2	11.55	5.84	7.23	12.81	10.81	12.25	7.11	7.11	8.58	11.09	13.68	12	8.9		CG2260	13.2467	10.0783	14.2233	7.645	10.434		CG2260	0.03	0.937699	-0.03	-0.0507838	0.246107	0.836519
CG2267	1.15	0.77	0.18	0	8.54	0.52	0.24	0.82	19.16	0.9	0.13	0	0	13.26	0.6	3.13	8.76	7.46	1.19	4.76	0	1.5	0	0.1	1.65	0	0.18	12.55	1.03	2.52	1.12	3.98	0	1.27		CG2267	1.86	3.54167	5.535	1.25833	2.43		CG2267	0.04	0.914674	0.04	0.288384	1.07618	0.788722
CG2269	0.1	0.17	0.2	0.6	1.63	1.49	0.86	0.82	0.71	0.96	0.1	0.03	0	0.31	0.11	0.25	0.45	0.68	0.05	0.1	1.02	1.15	0.52	2.01	0.14	0.05	0.19	0.43	0.08	0.13	0.09	0.1	0.09	0.07		CG2269	0.698333	0.58	0.3	0.808333	0.137		CG2269	0.81	0.155831	-0.81	-1.45266	0.774102	0.0605769
CG2277	12.62	11.98	10.84	10.63	11.32	10.74	11.84	6.64	14.02	7.05	10.25	8.36	10.26	28.49	14.42	15.05	13.71	14.1	8.49	11.38	5.4	10.44	7.34	11.32	9.35	19.53	15.14	16.61	11.39	8.89	11.4	15.69	9.33	11.28		CG2277	11.355	9.69333	16.005	9.06167	12.861		CG2277	0.13	0.736334	0.13	0.157836	0.237835	0.506923
CG2278	1.74	0.98	1.03	1.45	1.99	1.85	0.83	1.41	1.84	1.24	1.81	1.3	1.51	2.82	2.87	1.8	3.08	3.54	2.2	1.38	1.73	0.89	0.55	2.3	1.77	2.4	4.42	3.5	5.23	1.51	1.71	2.01	1.53	1.9		CG2278	1.50667	1.405	2.60333	1.50833	2.598		CG2278	0.47	0.341252	0.47	0.327555	0.23512	0.163578
CG2291	1.08	0.93	0.55	0	13.71	1.45	0	0	34.57	0.94	0.13	0	0	17.12	1.25	4.95	16.6	9.46	3.21	7.42	0.17	1.65	0	0	1.55	0	0.56	14.97	4.55	3.51	1.67	3.46	0	3.47		CG2291	2.95333	5.94	8.23	2.075	3.374		CG2291	0.02	0.959273	0.02	0.16662	1.22339	0.891667
CG2310	12.04	8.94	16.61	8.18	13.98	13.2	11.38	10.27	12.47	13.4	16.53	9.22	20.81	21.43	24.07	30.93	22.33	24.38	16.09	7	10.51	10.47	8.59	12.29	19.86	34.02	23.2	21.43	26.58	14.24	9.91	24.57	17.38	15.72		CG2310	12.1583	12.2117	23.9917	10.825	20.691		CG2310	1.97	0.0107794	1.97	0.40744	0.134862	0.00251814
CG2316	13.48	9.65	6.91	13.73	11.08	12.5	10.86	11.07	9.73	8.21	12.47	6.65	10.25	14.43	15.57	16.01	15.27	13.59	5.84	11.3	10.68	13.04	8.46	10.68	11.4	11.56	18.75	12.66	16.36	9.83	8.06	13.31	8.5	14.44		CG2316	11.225	9.83167	14.1867	10	12.487		CG2316	0.06	0.865908	-0.06	-0.0666885	0.170809	0.696221
CG2321	1.18	1.89	1.11	1.25	3.9	2.28	1.89	1.08	3.88	2.16	2.03	1.16	2.53	3.97	5.08	4.01	3.35	4.39	1.48	1.56	2.74	1.26	1.34	3.75	2.87	3.45	5.5	4.41	5.3	1.31	2.28	4.23	1.63	2.62		CG2321	1.935	2.03333	3.88833	2.02167	3.36		CG2321	0.79	0.161794	0.79	0.409012	0.220329	0.0634007
CG2336	0.07	0.31	0	0.15	0.59	0.16	0	0	1.52	0.09	0	0	0	0.73	0.15	0.28	0.82	0.79	0	0.08	0	0.05	0	0	0	0	0	0.18	0.23	0.05	0	0.33	0	0.12		CG2336	0.213333	0.268333	0.461667	0.0216667	0.091		CG2336	0.06	0.861323	0.06	0.456978	1.14306	0.689316
CG2371	8.32	12.25	6.46	5.61	8.01	7.71	6.12	5.07	10.66	6.71	11.21	6.65	8.62	11.96	10.59	9.93	9.57	10.51	9.17	6.15	8.01	9.23	7.02	10.78	9.73	10.76	11.15	13.08	8.57	5.67	8.22	14.91	11.44	11.25		CG2371	8.06	7.73667	10.1967	8.39333	10.478		CG2371	0.26	0.553653	-0.26	-0.150887	0.15094	0.317483
CG2444	23.77	29.03	27.39	25.21	32	24.55	31.41	34.22	41.87	28.26	20.11	37.01	12.16	78.41	46.13	38.84	42.28	31.53	34.92	26.17	27.88	21.86	20.75	28	20.07	30.78	24.56	34.6	36.13	14.63	19.65	23.13	8.01	25.19		CG2444	26.9917	32.1467	41.5583	26.5967	23.675		CG2444	0.17	0.683874	-0.17	-0.264147	0.346995	0.446514
CG2453	13.16	6.98	11.26	10.69	8.26	12.22	8.23	6.31	11.87	6.97	14.14	8.77	15.05	9.1	10.21	10.35	6.7	12.98	7.88	8.1	9.62	7.36	8.82	5.65	11.87	10.25	11.35	5.38	7.08	6.7	5.79	8.4	15.11	6.61		CG2453	10.4283	9.38167	10.7317	7.905	8.854		CG2453	0.39	0.404913	-0.39	-0.324263	0.256482	0.206134
CG2493	72.03	100.76	97.28	42.49	104.68	84.89	70.55	53.48	130.43	82.87	115.46	86.1	85.16	197.82	215.66	195.84	133.91	152.29	134.24	70.96	62.56	50.39	41.69	61.5	106.68	176.63	174.28	141.8	168.02	54.17	58.93	135.36	74.03	93.7		CG2493	83.6883	89.815	163.447	70.2233	118.36		CG2493	0.62	0.239704	0.62	0.305599	0.188209	0.104436
CG2519	2.11	2.6	2.52	2.15	5.08	2.64	2.26	1.63	4.34	3.06	2.08	1.86	2.08	3.44	3.8	3.36	3.44	3.74	3.33	1.76	2.99	2.53	1.39	3.1	3.35	3.31	2.94	4.18	3.3	2.8	2.03	3.39	2.82	2.69		CG2519	2.85	2.53833	3.31	2.51667	3.081		CG2519	0.21	0.615297	-0.21	-0.157141	0.17815	0.377741
CG2528	0.5	0.65	0.43	0.34	0.97	0.88	0.32	0.32	1.5	0.65	0.88	0.5	0.46	1.69	1.75	2.21	1.72	1.17	0.73	0.53	0.46	0.42	0.31	0.55	0.59	0.93	1.82	1.82	2.31	0.52	0.39	1.09	0.57	0.78		CG2528	0.628333	0.695	1.5	0.5	1.082		CG2528	0.67	0.215292	0.67	0.591996	0.350348	0.0910787
CG2533	0.22	0.66	0.41	0.61	4.63	0.33	0.34	0.71	9.68	0.14	0	0.21	0	4.02	0.97	4.1	4.68	4.7	0.52	1.97	0.23	0.96	0	0.09	0.39	0.27	0.59	5.43	1.93	2.29	0.9	1.04	0	2.12		CG2533	1.14333	1.84667	3.07833	0.628333	1.496		CG2533	0.05	0.892913	0.05	0.324725	0.989661	0.742823
CG2540	1.66	0.56	1.66	0.94	2.38	0.88	1.23	3.58	3.94	0.76	0.37	0.42	0.77	2.53	1.62	2.61	1.51	0.55	1.62	0.64	1.41	3.55	3.27	1.6	1.32	2.78	4.04	5.49	1.67	2.68	4.53	2.08	7.88	2.41		CG2540	1.34667	1.71667	1.59833	2.015	3.488		CG2540	0.28	0.521961	-0.28	-0.665608	0.631283	0.291712
CG2543	0.78	0.41	0.54	0.6	0.12	0.4	0.66	0.17	0.85	0.6	0.48	0.3	0	0.57	0.42	0.39	0.14	0.51	0.15	0.62	0.57	0.62	0.67	0.24	0.32	0.26	0.31	0.17	0.25	0.41	0.1	0.35	0.09	0.33		CG2543	0.475	0.51	0.338333	0.478333	0.259		CG2543	1.1	0.0786008	-1.1	-1.0826	0.487335	0.0263195
CG2556	3.28	2.9	0.86	3.8	1.36	3.64	2.41	4.36	3.47	3.15	3.2	0.51	23.86	20.1	27.28	27.97	30.1	29.31	0.28	4.35	4.12	4.07	4.14	26.06	25.52	31.99	47.64	41.92	40.65	16.64	18.18	45.89	26.53	33.97		CG2556	2.64	2.85	26.4367	7.17	32.893		CG2556	9.83	1.48263e-10	9.83	2.58931	0.373173	3.95919e-12
CG2574	2.02	1.3	0.16	1.81	9.13	0.96	0.11	0	14.76	0.42	0.12	0	0	4.69	0.48	5.1	8.04	6.3	1.55	1.76	0	0.88	0	0	0.31	0.36	0.33	9.6	0	0.93	0.89	5.12	0	0.91		CG2574	2.56333	2.56833	4.10167	0.698333	1.845		CG2574	0.04	0.907175	0.04	0.327268	1.14373	0.77477
CG2577	0	0	0	0	1.32	0	0	0	1.95	0.3	0	0	0	1.17	0	0	0.22	1.02	0	0.43	0	0.21	0	0	0	0	0	0.13	0	0	0	1.04	0	0		CG2577	0.22	0.375	0.401667	0.106667	0.117		CG2577	0.01	0.97079	-0.01	-0.116602	1.31664	0.929431
CG2604	52.73	42.55	54.7	45.7	46.57	53.89	38.4	30.56	52.75	36.08	48.55	42.98	36.87	67.22	69.44	61.21	78	65.66	47.19	45.88	35.87	37.2	41.72	40.98	62.08	50.14	51.8	50.24	66.85	39.52	34.77	65.31	40.92	44.04		CG2604	49.3567	41.5533	63.0667	41.4733	50.567		CG2604	0.03	0.939683	0.03	0.0263973	0.133623	0.843397
CG2608	12.3	13.2	13.45	9.34	13.37	12.61	10.32	7.08	10.51	10.54	14.32	7.36	12.23	14.4	19.86	18.48	20.36	17.11	15.38	8.66	9.36	11.94	10.59	13.08	17.91	18.06	19.78	21.81	15.3	13	10.19	19.64	23.68	13.59		CG2608	12.3783	10.0217	17.0733	11.5017	17.296		CG2608	0.46	0.344661	0.46	0.207517	0.149712	0.165715
CG2611	32.74	33.35	31.34	23.9	39.29	36.01	28.7	14.51	41.01	24.67	51.94	27.3	63.84	43.19	55.09	47.52	59.21	57.69	39.68	27.41	20.17	24.45	31.98	36.56	73.1	47.92	48.2	46.42	50.76	36.61	24	59.84	45.63	42.8		CG2611	32.7717	31.355	54.4233	30.0417	47.528		CG2611	0.39	0.410318	0.39	0.289601	0.230921	0.209801
CG2614	5.79	7.33	7.57	6.81	6.47	9.35	8.13	3.95	9.51	7.08	9.66	7.45	9.57	14.05	12.93	12.6	12.12	10.25	10.85	6.97	6.24	6.27	6.73	8.04	12.28	12	15.53	12.28	13.11	9.63	6.46	15.5	8.64	11.92		CG2614	7.22	7.63	11.92	7.51667	11.735		CG2614	0.12	0.764111	0.12	0.091558	0.1502	0.542144
CG2616	0.8	0.15	0.07	0.13	2.3	0.2	0.05	0	2.31	0.47	0.15	0	0	3.73	0	0.59	3.13	2.57	0.49	0.94	0	0.49	0	0.31	0.26	0.07	0.14	2.63	0	1.05	0.19	1.55	0	0.38		CG2616	0.608333	0.496667	1.67	0.371667	0.627		CG2616	0.25	0.567345	0.25	1.11114	1.14192	0.330531
CG2617	2.64	3.76	6.75	3.23	5.93	4.11	4.11	2.58	8.6	3.65	2.63	3.88	0.57	5.44	4.5	3.36	5.24	5.15	3.61	4.27	3.15	3.58	2.52	3.62	2.93	3.95	2.74	4.09	3.27	2.86	4.2	5.48	0.64	1.8		CG2617	4.40333	4.24167	4.04333	3.45833	3.196		CG2617	0.6	0.248772	-0.6	-0.61355	0.383219	0.109367
CG2641	21.33	32.9	24.07	12.78	25.18	28.9	17.47	15.56	40.7	21.87	27.29	24.91	27.24	56.04	62.91	71.88	46.96	31.17	36.78	19.91	15.2	16.23	11.41	18.25	25.41	47.39	50.15	42.93	53.42	14.9	14.94	40.68	12.93	24.91		CG2641	24.1933	24.6333	49.3667	19.63	32.766		CG2641	0.86	0.138074	0.86	0.444615	0.228872	0.0520604
CG2650	0.18	0	1.23	0.69	0.13	0	0.42	0.21	0.59	0.46	0.3	0	0.41	1.62	0.13	0.15	0.06	0.15	0.32	0.49	0.13	0.37	0	0.77	0	0.6	0	0	0.79	0	0	0.86	0.56	0		CG2650	0.371667	0.33	0.42	0.346667	0.281		CG2650	0.03	0.944032	-0.03	-0.151377	0.819546	0.853458
CG2652	1.3	0.6	1.67	1.85	11.49	1.31	0.46	0	7.71	0	1.09	0	1.01	7.18	1.95	2.42	9.72	4.64	1.39	2.46	0	0.75	0.13	1.89	1.56	0.73	3.14	9.32	3.4	2.22	0	4.6	2.74	4.44		CG2652	3.03667	1.54333	4.48667	1.10333	3.215		CG2652	0.29	0.513704	0.29	1.06265	0.993637	0.284864
CG2656	2.92	3.1	3.82	3.03	5.2	2.99	3.82	3.3	5.1	3.41	3.27	2.81	4.12	5.06	5.59	4.25	4.09	3.52	4.75	1.99	3.06	3.99	4.02	5.2	5.69	5.46	4.77	6.79	4.58	3.92	4.17	6.23	4.4	5.78		CG2656	3.51	3.61833	4.43833	3.835	5.179		CG2656	0.69	0.205029	-0.69	-0.268275	0.156006	0.0854971
CG2658	12.6	14.52	9.21	11.71	11.61	16.14	11.63	7.51	10.66	9.48	10.94	9.43	10.87	12.5	14.7	13.63	12.45	14.95	9.78	9.69	8.94	11.57	6.41	10.12	12.89	15.97	13.96	12.31	13.46	9.68	9.75	14.38	7.46	12.7		CG2658	12.6317	9.94167	13.1833	9.41833	12.256		CG2658	0.45	0.352413	-0.45	-0.171451	0.125112	0.170567
CG2662	3.08	2.55	3.79	2.12	4.78	2.72	1.99	0.63	7.95	3.32	2.75	2.57	2.56	4.08	3.75	5.6	5.61	5.57	1.55	3.7	2.42	2.84	1.05	2.99	3.68	1.55	3.03	5.35	5.71	3.16	0.92	4.83	2.22	3.83		CG2662	3.17333	3.20167	4.52833	2.425	3.428		CG2662	0.01	0.977123	0.01	0.0273381	0.386387	0.943594
CG2663	0.55	0.13	2.5	0.53	0.99	1.22	0.46	0.48	0	0.11	23.54	0.85	0.27	0.66	0.09	0.43	0.04	0.72	0.21	0.16	0.45	1.71	0.66	0.45	0.21	0.63	0.27	1.31	0.13	0.76	0.24	0.28	2.1	0.2		CG2663	0.986667	4.24	0.368333	0.606667	0.613		CG2663	0	NA	0	-3.19779	1.04218	NA
CG2678	1.18	1.4	1.64	0.3	1.63	0.34	0.56	0.55	3.35	0.89	1.27	0.92	1.41	3.47	3.07	5.62	2.93	2.1	0.97	0.76	0.32	0.89	0.18	2.39	3.04	3.5	7.08	6.4	7.1	0.83	1.11	2.82	5.4	2.17		CG2678	1.08167	1.25667	3.1	0.918333	3.945		CG2678	0.9	0.125134	0.9	0.803846	0.403118	0.046144
CG2680	20.13	16.3	4.82	14.26	5.75	9.1	2.54	9.84	8.63	4.4	10.67	13.34	3.92	2.75	3.48	2.79	6.36	3.31	1.91	12.04	3.74	4.59	7.48	3.43	3.13	3.03	1.95	6.28	3.24	10.65	6.9	5.73	3.17	7.06		CG2680	11.7267	8.23667	3.76833	5.53167	5.114		CG2680	3.3	0.000498087	-3.3	-1.67969	0.423817	7.3937e-05
CG2681	8.15	6.48	1.32	9.42	1.57	6.75	4.71	3.45	2.05	1.79	7.48	1.01	2.56	0.68	0.36	0.23	0.67	0.34	0.33	6.05	3	8.18	7.5	0.42	0.84	0.29	0	0.06	0.31	5.39	2.73	0.33	1.63	4.17		CG2681	5.615	3.415	0.806667	4.24667	1.575		CG2681	2.96	0.00110021	-2.96	-2.38764	0.638012	0.000182334
CG2685	3.49	5.45	5.44	1.98	4.93	5.41	3.87	3.67	4.36	2.97	5.56	3.37	5.73	4.03	5.63	6.07	3.72	9.12	4.82	4.84	2.23	2.94	2.33	2.27	5.43	6	5.61	5.33	4.27	4.29	4.22	4.75	2.79	5		CG2685	4.45	3.96667	5.71667	3.23833	4.769		CG2685	0.02	0.957285	-0.02	-0.0367862	0.254908	0.885254
CG2691	2.78	3.68	3.35	2.89	5.61	3.76	4.65	3.01	4.32	2.19	3.35	2.05	5.44	5.56	6.51	3.2	4.42	2.83	3.8	2.21	1.89	4.23	3.41	4.88	6.38	3.18	6.01	6.21	7.33	5.55	5.96	5.58	7.57	2.97		CG2691	3.67833	3.26167	4.66	3.40333	5.674		CG2691	0.02	0.959273	-0.02	-0.039629	0.289615	0.891162
CG2694	4.15	4.61	4.74	3.91	5.67	4.31	3.13	2.71	6.48	4.3	5.27	2.59	3.97	5.24	5.64	5.22	4.8	7.34	3.76	4.55	3.96	3.39	3.39	3.93	5.02	4.66	4.83	6.48	4.91	3.07	2.82	6.49	1.68	2.74		CG2694	4.565	4.08	5.36833	3.83	4.27		CG2694	0.15	0.701795	-0.15	-0.127176	0.174765	0.466798
CG2698	10.84	12.44	11.91	9.4	16.22	10.88	12.56	8.68	19.61	12.68	14.03	14.3	15.15	24.34	27.29	23.75	25.95	29.25	15.31	12.45	12.68	12.18	10.83	18.87	22.2	30.16	27.81	25.1	29.77	13.24	15.58	23.8	14.82	19.31		CG2698	11.9483	13.6433	24.2883	13.72	22.179		CG2698	0.84	0.144263	0.84	0.268225	0.13971	0.0548741
CG2701	8.53	7.06	8.95	7.91	10.37	8.84	5.36	5.02	10.05	6.11	9.81	6.74	7.14	11.89	10.06	7.63	11.14	12.78	6.43	6.77	5.86	5.67	4.6	7.42	8.16	8.75	10.36	11.39	9.17	6.76	6.52	11.28	6.56	8.6		CG2701	8.61	7.18167	10.1067	6.125	8.755		CG2701	0.04	0.909386	-0.04	-0.0479224	0.170924	0.779191
CG2712	1.7	1.92	2.98	1.47	4.33	3.2	1.93	1.68	3.16	1.83	1.92	1.11	3.39	3.55	3.21	4.3	2.08	2.97	2.78	1.23	1.57	2.15	1.27	1.85	1.99	1.51	2.53	3.22	3.68	1.83	0.56	3.12	2.26	2.9		CG2712	2.6	1.93833	3.25	1.80833	2.36		CG2712	0.15	0.702575	0.15	0.17464	0.240448	0.467649
CG2736	57.84	26.39	43.44	43.83	28.43	54.49	60.12	18.1	57.63	39.53	57.3	27.32	19.22	62.95	9.95	11.71	51.59	31.38	22.23	33.97	19.53	37.45	36.57	28.38	28.55	48.1	14.88	23.21	24.74	24.06	24.88	10.76	11.19	23.28		CG2736	42.4033	43.3333	31.1333	29.6883	23.365		CG2736	1.07	0.0844796	-1.07	-0.979336	0.447603	0.0286726
CG2747	1.7	1.5	1.72	1.75	1.89	1.57	1.73	1.15	2.16	1.61	2.06	1.54	2.32	2.68	3.05	2.62	2.75	3.03	1.68	1.28	1.18	1.37	1.93	2.43	2.72	2.69	3.27	3.51	3.31	1.78	2.08	3.3	1.88	2.62		CG2747	1.68833	1.70833	2.74167	1.645	2.716		CG2747	0.4	0.400853	0.4	0.123545	0.0971229	0.203354
CG2750	0.01	0.01	0.04	0.01	0.4	0.06	0.01	0	0.92	0.06	0.02	0	0	0.52	0.02	0.27	0.47	0.35	0.03	0.1	0	0.02	0	0.01	0.04	0	0.04	0.41	0.01	0.12	0.05	0.17	0.09	0.03		CG2750	0.0883333	0.168333	0.271667	0.0266667	0.096		CG2750	0.04	0.903569	0.04	0.318679	1.08396	0.768762
CG2765	8.84	11.82	9.83	8.35	13.74	9.65	12.47	11.1	15.85	10.34	18.46	8.6	17.59	17.64	22.09	16.29	21.58	18.39	13.53	9.52	7.04	12.86	14.77	14.7	15.87	18.02	15.65	20.99	18.94	14.78	15.62	20.23	14.36	15.12		CG2765	10.3717	12.8033	18.93	12.07	16.958		CG2765	0.02	0.960642	0.02	0.0188734	0.14825	0.898696
CG2767	27.05	30.93	28.11	25.34	33.97	17	27.65	30.03	35.39	26.71	26.08	32.11	32.83	45.98	39.59	38.41	42.16	33.94	37.53	22.76	21.56	17.49	29.13	27.63	40.6	45.96	43.49	40.65	41.04	29.54	25.44	45.5	22.44	27.55		CG2767	27.0667	29.6617	38.8183	26.0167	36.221		CG2767	0.43	0.373837	-0.43	-0.20466	0.15441	0.185026
CG2772	27.17	2.58	2.96	45.12	7.72	1.26	34.77	30.7	16.13	2.43	25.73	0.57	7.91	0.1	0	0.11	3.24	3.07	0.16	37.85	14.3	44.52	32.17	4.7	5.83	0.75	0	0.11	0	52	24.91	7.42	0.61	44.06		CG2772	14.4683	18.3883	2.405	22.2833	13.569		CG2772	1.82	0.0152074	-1.82	-2.85757	0.987178	0.0037954
CG2781	4.53	5.7	9.01	7.68	6.3	4.9	6.48	6.27	1.63	6.8	6.6	10.81	0.71	1.08	0.55	0.42	1.09	2.3	7.58	4.78	6.95	6.38	6.63	6.94	1.37	0.71	1.06	1.23	1.7	4.75	5.83	0.83	2.98	4.43		CG2781	6.35333	6.43167	1.025	6.54333	2.489		CG2781	8.49	3.2113e-09	-8.49	-3.19794	0.49595	1.1326e-10
CG2790	22.86	24.69	27.99	25.6	36.02	36.39	23.6	13.39	32.43	25.88	34.9	19.99	33.86	39.87	46.62	45.7	49.25	39.39	29.65	21.07	19.53	24.88	13.13	29.05	38.27	31.24	39.11	42.87	45.14	29.14	25.36	39.35	19.16	28.09		CG2790	28.925	25.0317	42.4483	22.885	33.773		CG2790	0.67	0.215147	0.67	0.223652	0.132328	0.0910029
CG2794	10.13	12.75	9.33	10.25	13.6	11.57	10.81	6.72	8.98	9.23	9.37	7.91	8.31	10.57	11.72	9.61	11.01	9.51	11.47	8.16	5.1	8.62	7.79	7.67	12.71	13.69	6.82	6.71	6.46	10.47	8.03	14.2	7.57	10.27		CG2794	11.2717	8.83667	10.1217	8.135	9.693		CG2794	1.51	0.0306278	-1.51	-0.381936	0.145376	0.0086084
CG2811	128.75	152.82	118.87	122.74	139.85	139.12	108.09	103.26	130.15	114.96	119.91	114.67	128.94	143.1	153	146.12	139.11	150.46	151.68	128.95	109.96	105.13	108.4	112.17	169.91	158.68	117.82	119.07	116.84	111.92	85.95	139.71	138.47	123.6		CG2811	133.692	115.173	143.455	119.382	128.197		CG2811	1.52	0.0302359	-1.52	-0.261437	0.0993125	0.00847679
CG2812	1.62	0.44	1.69	2.17	1.75	1.71	1.42	1.87	0.88	1.79	1.5	1.09	0.28	1.02	0.05	0.66	0.86	0.96	1.23	1.12	2.07	1.77	1.97	1.71	0.66	0.62	0	0.69	0.21	1.7	0.85	0.41	0	0.99		CG2812	1.56333	1.425	0.638333	1.645	0.613		CG2812	2.67	0.00213156	-2.67	-1.67597	0.472474	0.00038932
CG2816	12.33	12.69	7.29	6.12	18.51	5.73	11.08	10.51	22.71	10.22	63.91	19.08	4.61	99.79	38.03	35.76	36.11	23.99	10.5	16.21	11.79	10.56	2.98	9.03	9.94	37.83	19.17	22.16	20.06	9.47	36.22	15.61	12.25	15.31		CG2816	10.445	22.9183	39.715	10.1783	19.802		CG2816	0.08	0.838659	0.08	0.252136	0.557083	0.650837
CG2818	22.17	37.48	21.38	14.42	27.66	27.55	15.38	26.67	39.74	33.47	23.22	23.96	40.96	83.6	88.61	97.25	52.54	50.37	24.37	34.07	23.85	19.28	11.67	31.85	46.74	74.39	83.29	80.3	84.37	60.37	29.19	60.22	26.15	43.32		CG2818	25.11	27.0733	68.8883	24.1817	58.834		CG2818	2.06	0.00877949	2.06	0.756631	0.244694	0.00198712
CG2837	2.97	2.33	2.34	3.24	2.79	3.42	2.42	1.67	0.72	1.94	13.32	2.97	0.37	1.48	0.74	0.47	2.06	1.66	2.26	2.64	2.52	2.7	1.96	2.25	2.3	0.15	0.69	2.09	2.06	2.93	2.05	0.85	0	2.57		CG2837	2.84833	3.84	1.13	2.38833	1.569		CG2837	2.59	0.00259545	-2.59	-2.14265	0.614387	0.000487627
CG2839	1.09	0.27	1.18	1.03	1.04	0.61	0.34	0.91	5.15	0.05	1.03	0.05	0.84	0.92	0.3	1.06	0.9	0.53	0.98	0.85	0.28	1.05	0.19	0.49	1.51	0.88	1.2	3.56	0.72	1.71	0.73	1.71	1.78	0.96		CG2839	0.87	1.255	0.758333	0.64	1.476		CG2839	0.39	0.410318	-0.39	-0.971989	0.775025	0.209792
CG2841	1.98	2.39	2.34	3.06	2.03	2.03	1.95	2.33	2.06	2.09	1.52	2.23	1.91	1.15	0.58	0.71	0.97	0.98	1.93	2.52	1.64	2.68	2.45	2.17	1.16	0.19	0.65	1.61	0.94	2.46	1.98	0.94	0.88	1.78		CG2841	2.305	2.03	1.05	2.23167	1.259		CG2841	3.75	0.000178986	-3.75	-1.48636	0.350998	2.28886e-05
CG2846	42.21	56.47	45.21	39.56	33.65	44.76	45.65	40.92	53.96	39.04	52.41	48.36	38.01	40.3	41.3	56.16	35.99	41.5	49.43	44.63	31.79	28.69	26.71	37.24	50.95	54.08	60.54	47.4	54.77	32.55	38.33	49.95	41.96	56.37		CG2846	43.6433	46.7233	42.21	36.415	48.69		CG2846	5.44	3.66848e-06	-5.44	-0.724524	0.141119	2.83418e-07
CG2852	755.91	1041.85	1040.79	581.92	745.81	832.23	725.45	732.67	1170.5	863.9	1143.57	987.55	846.13	1188.79	1217.02	1218.14	1035.35	1160.21	1136.22	944.34	766.91	600.97	666.58	666.42	1068.18	1448.82	1089.08	953.83	1155.94	800.31	629.33	1108.99	628.15	892.4		CG2852	833.085	937.273	1110.94	796.907	977.503		CG2852	2.21	0.00617134	-2.21	-0.322482	0.100426	0.00132216
CG2854	0.34	0.16	0.04	0.16	1.21	0.09	0.03	0.24	2.4	0.15	0.19	0.04	0.2	1.89	0.25	0.93	2.3	1.26	0.38	0.56	0.04	0.08	0.13	0.15	0.57	0.76	0.58	0.98	0.32	0.62	0.32	0.87	0	0.43		CG2854	0.333333	0.508333	1.13833	0.223333	0.545		CG2854	0.2	0.627531	0.2	0.690443	0.802955	0.389857
CG2861	1.78	0.82	0.91	1.01	7.39	1.16	0.76	0.51	15.07	0.53	0.9	0.09	1.03	4.46	0.46	1.62	7.55	3.36	1.29	2.66	0.08	1.24	0.13	0.7	2.11	0.29	1.01	8.29	0.78	3.98	2.25	3.31	0.89	3.35		CG2861	2.17833	2.97667	3.08	1.01667	2.626		CG2861	0.03	0.924031	-0.03	-0.205001	0.842485	0.80775
CG2862	357.93	320.33	315.52	249.63	282.6	360.62	301.39	271.75	403.82	268.68	357.95	283.84	322.68	340.55	366.35	379.16	345.69	356.8	322.89	298.69	270.67	255.62	240.05	285.72	315.12	446.74	342.32	321.58	333.73	246.37	220.28	340.71	243.42	276.73		CG2862	314.438	314.572	351.872	278.94	308.7		CG2862	4.96	1.09096e-05	-4.96	-0.400602	0.0817989	9.71097e-07
CG2865	7.83	9.45	6.14	6.41	13.59	11.42	7.81	8.8	11.86	9.69	10.56	7.62	13.17	25.16	29.91	26.21	27.92	26.82	9.49	12.2	7.19	6.52	5.06	12.77	10.98	18.73	24.37	23.15	31.88	9.33	7.75	16.99	8.38	10.26		CG2865	9.14	9.39	24.865	8.87167	16.182		CG2865	7.1	8.02676e-08	7.1	0.817116	0.138723	3.85603e-09
CG2871	1.03	0.33	0.45	0.52	6.75	0	0	0	11.45	0.19	0.66	0.09	1.2	2.13	0.44	2.19	6.5	4.25	0.36	1.22	0	0	0	0	1.81	0	0	6.14	1.81	1.73	1.54	1.7	0	0.88		CG2871	1.51333	2.065	2.785	0.263333	1.561		CG2871	0.02	0.950974	0.02	0.169146	1.04273	0.871137
CG2875	3.79	4.26	5.21	3.16	4.56	5.66	3.51	2.41	5.06	4.77	4.98	3.16	4.73	5.76	7.28	5.84	3.9	5.85	3.89	2.99	2.38	4.48	2.39	5.12	6.55	6.91	5.29	5.06	4.57	3.4	2.73	5.68	4.16	5.17		CG2875	4.44	3.98167	5.56	3.54167	4.952		CG2875	0.06	0.871433	-0.06	-0.0661256	0.175803	0.706817
CG2887	0.58	0.19	1.15	0.12	1.55	0.63	0.79	0.5	3.25	1.3	0.56	0.16	0.77	3.29	0.62	2.54	1.75	1.92	2.13	1.56	0.94	0.46	0.2	0	0.48	0	0.26	3.18	2.23	0.24	0.81	0.96	0	0		CG2887	0.703333	1.09333	1.815	0.881667	0.816		CG2887	0.07	0.85095	0.07	0.244	0.569969	0.668583
CG2889	4.34	3.1	4.23	4.69	3.19	4.2	2.98	2.86	7.59	3.81	3.82	3.6	5.59	6.62	7.57	7.9	6.69	4.89	4.57	2.78	2.84	2.7	3.71	4.11	5.41	4.66	8.07	6.47	8.09	3.41	4.17	7.14	5.26	4.11		CG2889	3.95833	4.11	6.54333	3.45167	5.679		CG2889	0.17	0.682813	0.17	0.141644	0.185541	0.445218
CG2898	0.12	0.05	0.31	0.52	0.74	0.47	0.04	0.39	0.71	0.25	0.33	0	0.57	1.16	0.33	0.25	0.97	0.79	0.13	0.2	0	0.22	0.07	0.29	0.55	0.09	0.38	0.85	0.06	0.08	0.72	1	1.85	0.86		CG2898	0.368333	0.286667	0.678333	0.151667	0.644		CG2898	0.28	0.519418	0.28	0.681977	0.644199	0.289762
CG2901	0.06	0	0	0	0.13	0	0	0	0.59	0.1	0	0	0	0.19	0	0	0.3	0.18	0	0.02	0	0	0	0	0	0	0	0	0	0.02	0	0	0	0.03		CG2901	0.0316667	0.115	0.111667	0.00333333	0.005		CG2901	0.03	0.944032	-0.03	-0.24037	1.30106	0.853426
CG2906	31.91	29.26	22.19	32.46	27.13	26.61	25.06	21.97	27.72	20.45	27.15	22.01	17.91	24.76	33.85	27.99	24.1	26.44	21.49	32.83	18.52	20.95	24.02	17.18	19.11	38.81	23.89	18.7	25.84	18.06	17.89	22.02	13.24	25.09		CG2906	28.26	24.06	25.8417	22.4983	22.265		CG2906	2.98	0.00105872	-2.98	-0.480574	0.128037	0.000174452
CG2909	62.14	166.8	71.98	49.9	132.93	93.42	54.78	84.59	179.21	132.4	69.4	95.88	40.69	50.49	78.43	63.67	54.3	52.69	79.95	102.93	64.22	40.33	35.89	36.62	41.09	89.13	50.12	65.75	70.54	21.94	29.64	74.66	37.51	43.81		CG2909	96.195	102.71	56.7117	59.99	52.419		CG2909	6.81	1.54335e-07	-6.81	-1.40063	0.2428	7.99006e-09
CG2911	5.19	3.53	3.58	3.38	3.73	5.52	4.82	1.56	3.38	2.8	5.02	3.67	4.81	8.9	7.64	7.1	6.62	7.95	3.42	2.86	1.84	2.71	2.59	2.94	4.57	5.18	5.36	5.68	7.61	3.71	1.96	4.82	2.26	2.27		CG2911	4.155	3.54167	7.17	2.72667	4.342		CG2911	0.75	0.177714	0.75	0.441414	0.2448	0.0713629
CG2915	83.99	70.21	49.99	79.56	61.93	58.72	65.07	65.09	74.13	47.74	67.3	53.82	40.09	58.14	73.73	72.03	48.54	59.53	56.91	82.94	43.05	54.66	64.15	37.31	49.37	76.6	57.64	49.93	68.01	46.18	44.96	47.36	32.78	63.47		CG2915	67.4	62.1917	58.6767	56.5033	53.63		CG2915	3.69	0.000203456	-3.69	-0.677733	0.161321	2.65569e-05
CG2918	105.84	157.47	136.13	130.32	92.63	166.74	96.88	101.09	95.08	134.41	129.71	100.08	235.16	102.74	143.68	133.93	141.32	145.16	136.78	112.29	92.67	108.61	88.98	145.95	243.07	105.35	140.97	138.79	144.08	188.41	113.79	223.66	172.65	168.22		CG2918	131.522	109.542	150.332	114.213	163.899		CG2918	0.05	0.895894	-0.05	-0.0841312	0.264266	0.750214
CG2921	19.76	18.47	15.24	15.05	26.53	21	11.41	8.86	38.95	18.72	14.23	10.83	13.87	31.1	26.5	23.26	29.13	27.66	19.75	23.9	8.74	12.91	10.58	12.74	19.2	14.36	18.87	26.25	16.85	13.32	12.86	25.11	20.49	18.79		CG2921	19.3417	17.1667	25.2533	14.77	18.61		CG2921	0.03	0.932808	0.03	0.0595966	0.270525	0.825638
CG2924	13.33	16.27	15.16	13.42	26.24	21.22	14.22	13.96	15.34	17.76	20.16	14.45	19.97	27	31.62	30.81	26.1	25.19	18.47	13.85	15.03	15.34	11.24	19.12	21.13	18.43	26.61	22.07	30.04	14.37	13.63	26.43	11.97	18.33		CG2924	17.6067	15.9817	26.7817	15.5083	20.301		CG2924	0.44	0.359447	0.44	0.16011	0.118168	0.175437
CG2926	18.19	19.89	22.21	15.37	28.43	25.6	16.01	13.62	25.33	20.63	26.05	18.3	39.31	34.9	39.83	42.67	35.61	39.92	25.21	17.26	20.58	16.57	15	27.15	35.47	30.84	41.57	36.81	38.63	20.45	17.71	38.15	30.76	26.02		CG2926	21.615	19.99	38.7067	20.295	31.641		CG2926	2.72	0.00192565	2.72	0.416009	0.116246	0.0003453
CG2930	11.95	7.03	4.54	18.43	4.34	9.52	10.75	12.27	6.36	1.89	14.35	1.24	5.27	1.41	0.35	0.37	1.6	0.87	0.23	11.77	5.15	21.6	18.42	2.51	4.04	0.66	0.37	0.55	0.71	14.37	9.7	1.82	1.48	11.7		CG2930	9.30167	7.81	1.645	9.94667	4.54		CG2930	2.6	0.00250801	-2.6	-2.48812	0.711311	0.000468877
CG2931	25.66	37.58	31.52	24.26	39.41	34.57	18.63	17.62	45.98	31.02	24.93	22.14	55.46	46.01	39.66	50.15	47.16	45.11	24.84	26.64	15.19	22.3	18.84	36.08	44.93	38.87	44.21	36.38	37.6	31.29	22.75	53.22	19.34	32		CG2931	32.1667	26.72	47.2583	23.9817	36.059		CG2931	0.61	0.248191	0.61	0.312034	0.194726	0.109061
CG2938	7.35	10.18	5.75	4.92	9.2	8.74	5.9	5.08	9.18	7	8.3	6.39	9.45	12.6	15.06	13.2	11.06	13.53	8.8	6.12	7.57	6.03	4.6	8.33	10.85	13.3	14.41	10.76	18.59	5.75	6.82	14.28	5.58	10.74		CG2938	7.69	6.975	12.4833	6.90833	11.108		CG2938	1.93	0.01166	1.93	0.282736	0.0944581	0.00276031
CG2941	0.73	1.52	2.13	0.68	1.44	1.37	1.57	1	2.78	0.99	1.8	0.8	2.58	2.88	4.49	2.75	3.11	2.7	1.94	1.54	1.42	0.97	1.57	1.01	2	1.9	4.58	4.12	4.29	1.11	0.77	2.33	1.27	1.34		CG2941	1.31167	1.49	3.085	1.40833	2.371		CG2941	1.05	0.0896278	1.05	0.522927	0.242123	0.0307915
CG2955	2.24	2.26	1.07	0.91	27.15	2.41	0.28	0.45	54.98	1.88	1.07	0.47	1.74	29.18	2.87	15.85	28	16.76	2.53	9.67	0.15	2.27	0.38	0.19	2.84	0.62	1.84	29.15	4.41	5.07	1.79	11.7	2.19	6.37		CG2955	6.00667	9.855	15.7333	2.53167	6.598		CG2955	0.06	0.869436	0.06	0.360704	0.946499	0.703134
CG2962	3.88	0.51	1.99	1.63	0.08	1.13	0.85	0.96	0.54	0.15	90.28	2.67	0.87	2.93	1.29	0.85	1.01	0.8	0.8	0.67	0.36	0.95	1.13	0.6	0.87	0.58	0.63	1.7	2.96	0.55	0.52	0.22	1.18	0		CG2962	1.53667	15.9083	1.29167	0.751667	0.921		CG2962	0	NA	0	-3.35638	0.97211	NA
CG2964	0.28	0.11	0.28	0.18	7.22	0.54	0.19	0.43	12.59	0.37	0.11	0.2	0	6.77	0.15	1.02	3.93	6.48	0.97	2.45	0.29	0.46	0	0.09	0.52	0	0	5.9	0.63	1.92	0.61	2.18	0	2.68		CG2964	1.435	2.315	3.05833	0.71	1.444		CG2964	0.01	0.967954	0.01	0.101303	1.02475	0.921253
CG2970	22.17	21.92	16	19.09	20.86	26.72	17.45	10.48	20.26	17.74	19.26	15.3	20.39	23.36	29.21	20.63	23.81	29.93	22.96	17.36	10.96	18.23	12.24	16.95	21.07	23.91	28.03	22.25	24.58	15.24	16.37	28.56	12.33	18.03		CG2970	21.1267	16.7483	24.555	16.45	21.037		CG2970	0	0.990162	0	-0.00409201	0.133211	0.975494
CG2972	4	4.07	6.78	3.88	4.72	4.37	3.96	2.97	7.27	4.48	4.71	3.89	3.96	6.33	8.61	8.49	6.52	4.76	5.24	3.77	3.93	5.62	3.29	5.05	8.15	4.89	7.37	4.37	8.29	5.27	5.85	5.63	11.61	7.71		CG2972	4.63667	4.54667	6.445	4.48333	6.914		CG2972	0.03	0.927707	-0.03	-0.043862	0.187004	0.814557
CG2974	5.55	5.77	7.34	4.57	6.65	4.99	5.46	8.19	12.58	6.75	6.65	4.82	4.46	12.16	9.94	13.48	10.63	7.72	6.6	6.68	5.58	5.67	7.01	6.9	8.99	9.97	10.6	7.58	14.51	5.79	4.95	8.17	5.15	9.26		CG2974	5.81167	7.40833	9.73167	6.40667	8.497		CG2974	0.14	0.720484	-0.14	-0.171909	0.247801	0.487845
CG2975	0.67	0.05	0.31	0.38	0.23	0.12	0.02	0	0.43	0	0.34	0.1	0.62	0.9	0.73	0.03	0.89	0.6	0.1	0.18	0.09	0	0.15	0.14	0.41	0.14	1.12	1.27	0.55	0.24	0.09	0.39	1.87	0.77		CG2975	0.293333	0.148333	0.628333	0.11	0.685		CG2975	0.83	0.147002	0.83	1.47939	0.774995	0.0562755
CG2982	11.72	11.62	13.2	11.17	14.89	14.57	10.23	8.24	14.18	8.02	11.56	6.39	18.5	10.38	15.42	14.69	15.23	12.11	11.8	6.59	6.05	10.12	7.61	8.73	14.99	10.35	15.63	14.63	14.22	7.39	6.98	19.14	15.44	11.38		CG2982	12.8617	9.77	14.3883	8.48333	13.015		CG2982	0.02	0.955607	0.02	0.030522	0.205886	0.882148
CG2983	0.08	0	0.12	0.43	0.11	0.06	0.36	0	0	0.29	0.25	0.05	0.52	0	0	0	0	0	0	0.04	0.21	0.31	0	0.13	0	0	0	0	0	0.11	0	0	0	0.13		CG2983	0.133333	0.158333	0.0866667	0.115	0.024		CG2983	0.16	0.692033	-0.16	-0.957909	1.28328	0.455394
CG2990	0.19	0.87	0.75	0.19	0.39	0.24	0.37	0.29	0.09	0.49	0.15	0.1	0.38	1.07	0.65	1.25	1.1	0.44	1.22	0.6	0.04	0.04	0	0.75	1.05	1	0.93	0.52	0.12	0.12	0.53	0.83	0	1.06		CG2990	0.438333	0.248333	0.815	0.441667	0.616		CG2990	0.94	0.114659	0.94	1.03423	0.507258	0.0414633
CG2991	8.68	8.14	11.01	7.13	8.51	10.94	8.45	6.7	13.66	7.64	11.82	9.5	15.95	9.35	9.92	10.62	16.54	16.01	13.98	8.98	9.16	7.92	5.77	10.9	16.14	11.24	11.61	9.61	11.31	11.44	6.96	14.32	16.88	13.8		CG2991	9.06833	9.62833	13.065	9.45167	12.331		CG2991	0.05	0.883585	-0.05	-0.07884	0.225468	0.726584
CG2993	0.27	0.24	0	0.11	0.6	0.58	0.38	0.55	0.44	0.7	0.02	0.02	0	0.15	0.17	0.7	0.27	0.28	0.02	0.06	0.22	1	0.07	0.87	0.28	0	0.45	0.33	0.47	0.22	0	0.07	0.55	0.03		CG2993	0.3	0.351667	0.261667	0.373333	0.24		CG2993	0.38	0.420095	-0.38	-0.9901	0.801694	0.216827
CG3008	18.78	23.1	25.42	20.08	21.91	18.1	17.27	14.06	28.17	20.23	22.4	16.62	28.56	30.72	28.07	33.02	28.05	28.63	24.02	17.66	17.8	18.45	17.39	20	26.56	26.66	33.6	36.8	36.48	18.62	13.34	27.33	19.12	20.23		CG3008	21.2317	19.7917	29.5083	19.22	25.874		CG3008	0.05	0.891452	0.05	0.0307323	0.0927722	0.740444
CG3009	2.68	1.35	1.24	2.11	0.7	1.02	0.71	0.77	1.21	0.67	3.26	2.01	0.98	2.11	1.71	1.05	1.38	1	0.88	1.45	0.24	0.72	0.77	1.36	1.69	1.01	2.5	4.89	3.86	2.31	2.6	0.88	4.1	1.23		CG3009	1.51667	1.43833	1.37167	0.903333	2.507		CG3009	0.55	0.284125	-0.55	-0.606606	0.399414	0.128828
CG3014	0.55	0.37	0.02	0.91	0.17	0.75	0.03	0.8	0.26	0.3	0.29	0.55	0.68	0	0	0	0.16	0	0	0.05	0.25	0.12	0.03	0	0.04	0	0	0	0	0.26	0.61	0	0	0.4		CG3014	0.461667	0.371667	0.14	0.075	0.131		CG3014	0.5	0.319033	-0.5	-1.55091	1.07705	0.149881
CG3021	6.97	6.06	6.93	4.89	9.01	6.87	4.53	3.99	8.4	6.76	7.18	7.11	9.94	9.31	8.3	9.23	8.32	7.3	6.72	6.03	5.82	6.19	4.19	7.46	7.34	5.99	7.5	7.52	6.58	7.7	3.56	9.75	3.89	7.86		CG3021	6.78833	6.32833	8.73333	6.06833	6.769		CG3021	0.07	0.842567	-0.07	-0.0824739	0.185208	0.6561
CG3032	0.44	0.77	0.29	0.27	1.79	1.23	0.59	0.82	0.89	1.06	0.98	0.71	0.87	1.23	1.31	0.52	2.01	1.64	1.52	0	1.06	0.17	0.82	0.87	1.17	0.52	0	2.6	0.56	0.55	0.35	0.72	0	0.85		CG3032	0.798333	0.841667	1.26333	0.74	0.732		CG3032	0.01	0.968821	0.01	0.034261	0.362265	0.924653
CG3036	14.62	7.88	8.56	14.85	8.79	9.84	10.76	9.89	9.3	6.22	8.09	9.76	8.52	4.6	2.28	3.61	7.18	5.06	8.77	7.66	7.18	10.89	13.77	7.96	7.21	1.33	3.16	6.32	6.18	12.51	12.83	4.35	3.41	10.55		CG3036	10.7567	9.00333	5.20833	9.37167	6.785		CG3036	2.84	0.00145114	-2.84	-1.32468	0.361748	0.000250353
CG3038	3.45	2.4	5.47	2.53	2.78	2.2	6.48	1.22	3.8	3.86	3.67	3.02	4.14	3.2	2.1	2.58	3.7	3.28	2.82	2.45	1.14	3.41	3.86	3.01	4.35	2.08	1.77	3.46	3.86	3.24	2.56	5.09	2.21	2.21		CG3038	3.13833	3.675	3.16667	2.78167	3.083		CG3038	1.01	0.0983055	-1.01	-0.750166	0.354736	0.034454
CG3040	14.15	16.68	16.37	10.62	8.23	14.48	13.23	11.81	19.39	11.12	11.24	13.3	20.96	24.21	19.07	21.71	16.79	19.89	12.26	16.23	11.62	8.18	12.01	13.38	22.87	32.92	23.13	14.98	23.17	12.64	13.25	15.7	6.96	22.43		CG3040	13.4217	13.3483	20.4383	12.28	18.805		CG3040	0.04	0.913374	0.04	0.047529	0.175334	0.786332
CG3045	2.88	3	4.18	3.39	4.28	2.79	2.98	0.52	5.99	2.55	6.28	3.14	7.96	2.48	2.72	2.92	5.25	6.3	2.98	4.15	2.49	2.43	3.01	3.93	4.34	2.77	3.4	3.3	3.65	5.41	1.82	3.66	6.35	0.7		CG3045	3.42	3.57667	4.605	3.165	3.54		CG3045	0.02	0.963981	-0.02	-0.0543124	0.47861	0.90965
CG3061	44.9	50.66	45.52	41.67	50.13	46.9	35.81	35.29	54.16	45.95	48.2	39.29	59.44	48.28	53.15	63.63	60.75	61.37	48.37	43.32	41.15	38.18	36.89	42.96	62.17	60.15	58.35	68.86	62.82	50.91	41.07	74.99	47.37	59.78		CG3061	46.63	43.1167	57.77	41.8117	58.647		CG3061	0.3	0.497807	-0.3	-0.129269	0.117754	0.272294
CG3062	0.5	0.22	0.13	0.36	0.29	0.19	0.05	0.09	1.15	0.07	0.14	0.05	0.03	1.08	0.3	0.24	1	0.4	0.14	0.24	0.04	0	0.02	0.15	0.64	0.24	0.42	2.23	1.53	0.19	0.28	0.52	1.66	0.41		CG3062	0.281667	0.258333	0.508333	0.0983333	0.812		CG3062	0.13	0.738176	0.13	0.499446	0.757559	0.509714
CG3065	10.32	11.5	14.48	8.16	13.85	9.88	9.13	6.74	16.82	11.3	11.82	10.15	29.06	23.94	28.39	28.13	23.77	27.76	15.41	11	11.4	9.66	8.63	18.56	25.37	34.12	35.07	29.09	24.87	17.29	16.18	31.04	20.99	24.24		CG3065	11.365	10.9933	26.8417	12.4433	25.826		CG3065	5.3	5.0139e-06	5.3	0.755662	0.149138	4.04396e-07
CG3071	8.51	6.76	11.47	7.18	7.6	10.28	10.9	4.5	8.61	8.33	11.78	5.84	10.67	12.94	11.38	17.26	9.97	11.76	10.02	5.42	7.6	9.3	5.88	4.77	10.82	14.69	16.24	9.31	12.93	7.71	4.54	15.85	7.49	10.48		CG3071	8.63333	8.32667	12.33	7.165	11.006		CG3071	0.01	0.981825	0.01	0.0119975	0.21497	0.955493
CG3077	7.37	11.29	8.45	6.38	11.68	9.02	6.22	8.1	11.88	11.08	11.58	8.06	34.99	45.56	54.1	52.67	46.69	47.82	13.3	10.69	9.58	6.37	4.73	28.48	36.05	59.07	59.99	60.37	64.07	12.62	21.42	47.08	26.21	31.65		CG3077	9.03167	9.48667	46.9717	12.1917	41.853		CG3077	48.31	4.91408e-49	48.31	1.74322	0.11522	1.03511e-51
CG3078	0.19	0	0.29	0.27	0.32	0.28	0.06	0.09	0.12	0.12	0.04	0.02	0.26	0.46	0.62	0	0.55	0.43	0	0.02	0.05	0.26	0.16	0.36	0.3	0.06	0.41	0.36	0.42	0.3	0.16	0.04	0.47	0.03		CG3078	0.225	0.075	0.386667	0.141667	0.255		CG3078	1.4	0.040146	1.4	1.66682	0.662335	0.0118498
CG3081	0.18	0.07	0.1	0.06	0.22	0.08	0.03	0.06	0.87	0.06	0.06	0.01	0.03	0.46	0.16	0.18	0.67	0.27	0.11	0.18	0.03	0	0.01	0.11	0.14	0	0.29	0.87	1.07	0.08	0.03	0.23	0.51	0.31		CG3081	0.118333	0.181667	0.295	0.0733333	0.353		CG3081	0.05	0.898999	0.05	0.242328	0.782096	0.756679
CG3085	3.5	2.53	4.19	3.22	8.95	3.16	3.29	2.47	16.5	3.25	4.64	1.51	3.4	9.12	2.71	4.87	9.61	11	1.96	5.3	1.71	3.78	0.6	2.07	3.02	4.56	3.51	12.61	2.09	2.99	2.53	5.92	2.15	4.26		CG3085	4.25833	5.27667	6.785	2.57	4.364		CG3085	0.02	0.963278	-0.02	-0.0580425	0.489847	0.905679
CG3088	0	0	0	0	0	0	0	0	0	0	0	0	0	0	0	0	0	0	0	0	0	0	0	0	0	0	0	0	0	0	0.09	0	0	0		CG3088	0	0	0	0	0.009		CG3088	0	NA	0	NA	NA	NA
CG3091	3.24	6.62	7.1	3.75	5.82	3.07	7.47	10.39	11.51	4.08	6.87	3.85	28.51	11.04	13.15	14.36	10.17	6.43	7.16	6.69	3.33	5.9	6.23	9.5	30.98	13.44	12.74	18.23	13.04	13.77	12.43	16.84	34.9	17.55		CG3091	4.93333	7.36167	13.9433	6.46833	18.392		CG3091	0.24	0.582088	0.24	0.402986	0.425814	0.34395
CG3092	0.32	0.18	0	0.45	5.64	0.36	0	0	9.73	0.21	0	0	0	7.07	0.47	3.13	7.29	4.54	0.19	0.78	0	0.87	0	0	0	0	0	8.62	0	1.04	0	2.58	2.24	0.54		CG3092	1.15833	1.65667	3.75	0.306667	1.502		CG3092	0.1	0.80313	0.1	0.660578	1.24282	0.595061
CG3097	2.52	1.28	1.25	1.88	0.6	1.59	0.94	0.51	0.73	0.84	0.59	0.95	0.61	0.63	0.45	0.71	0.67	0.43	1	0.74	0.35	0.64	0.55	0.93	0.59	0.3	0.86	1.12	0.93	0.93	2.59	0.96	1.32	1.35		CG3097	1.52	0.76	0.583333	0.701667	1.095		CG3097	2.28	0.00527441	-2.28	-0.950475	0.291354	0.00110524
CG3104	2.16	0.76	1.63	1.93	0.8	0.97	2	0.14	0.07	0.28	1.77	0.45	0.67	0.16	0	0.35	1.04	0.95	0.59	0.33	0.28	1.31	0.69	0.79	1.24	0.03	0.21	0.1	0.14	1.55	0.61	0.06	0.62	0.49		CG3104	1.375	0.785	0.528333	0.665	0.505		CG3104	0.34	0.460397	-0.34	-0.994448	0.85421	0.244354
CG3106	60.35	4.11	7.48	58.74	4.47	35.88	37.05	26.71	16.16	22.38	34.25	1.59	2.51	1.13	0.48	0.31	2.45	1.4	0.18	24.94	32.9	88.43	54.18	6.72	18.03	2.14	3.04	2.6	3.19	25.35	20.3	1.89	3.91	11.2		CG3106	28.505	23.0233	1.38	34.5583	9.165		CG3106	9.7	2.01302e-10	-9.7	-4.31691	0.626423	5.526e-12
CG3107	18.77	17.35	19.63	21.06	24.94	16.9	19.56	15.47	19.86	14.61	19	15.37	23.91	24.95	31.6	27.89	27.92	20.04	19.97	11.15	13.63	19.56	16.58	21.04	28.26	18.86	29.61	28.72	20.26	22.26	19.72	24.71	18.39	20.7		CG3107	19.775	17.3117	26.0517	16.9883	23.149		CG3107	0.01	0.972037	0.01	0.0119478	0.141043	0.932492
CG3108	0.09	0.05	0.02	0.02	0.2	0.09	0.02	0.21	0.14	0.09	0.14	0.24	0.16	0.21	0.19	0.34	0.05	0.13	0	0.04	0.21	0.06	0.14	0.34	0.35	0.21	0.42	0.72	0.62	0.14	0.05	0.31	0.11	0.04		CG3108	0.0783333	0.14	0.18	0.131667	0.297		CG3108	0.06	0.868047	-0.06	-0.221834	0.576201	0.700242
CG3117	0	0.09	0	0.11	1.14	0	0	0.38	2.2	0.1	0	1.22	1.3	1.7	0	0	1.12	1.44	0.78	0.35	0	0	0.1	0.7	1.95	1.6	0.37	1.66	1.43	5.84	2.23	0.61	0	4.22		CG3117	0.223333	0.65	0.926667	0.321667	1.991		CG3117	0.01	0.984227	0.01	0.0524434	1.09337	0.961744
CG3119	1.85	0.62	2.25	2.13	1.99	1.89	3.01	1.25	0.65	2.36	0.58	4.12	0.4	0	0	0	0	1.2	1.99	3.27	2.26	2.73	2.04	2	0.5	0.64	0	0	0	1.58	1.85	0.07	0	0.42		CG3119	1.78833	1.995	0.266667	2.38167	0.506		CG3119	1.7	0.020159	-1.7	-2.89419	1.03746	0.0052758
CG3121	1.16	1.52	0.96	1.59	2.61	1.06	1.16	1.78	5.98	1.43	1.67	1.16	2.02	5.8	2.73	3.25	3.45	4.54	1.64	2.31	1.29	1.68	0.74	1.45	1.73	1.73	2.34	4.96	3.43	1.88	1.71	2.63	0.98	2.05		CG3121	1.48333	2.19667	3.63167	1.51833	2.344		CG3121	0.12	0.759999	0.12	0.234885	0.379855	0.536342
CG3123	0.18	0.06	0	0	0.45	0.04	0.06	0	0.35	0	0.15	0.07	0	0.6	0	0.22	0.59	0.26	0	0	0	0	0	0	0	0	0	1.36	0.06	0.04	0	0.4	0	0.09		CG3123	0.121667	0.105	0.278333	0	0.195		CG3123	0.21	0.617976	0.21	0.849034	0.970058	0.381443
CG3124	4.04	2.92	1.38	2.23	40.7	3.5	0.87	0.89	67.96	4.29	1.59	0.19	2.61	45.07	1.79	10.39	45.81	34.13	2.92	18.05	0.74	4.22	0.36	0.52	8.09	0	3.28	37.81	5.53	9.54	4.49	20.47	3.78	8.94		CG3124	9.12833	12.6317	23.3	4.46833	10.193		CG3124	0.1	0.791942	0.1	0.531133	0.955722	0.578389
CG3149	10.03	7.26	6.63	5.77	8.18	7.95	7.48	8.6	8.3	6.5	7.9	7.36	8.6	11.32	13.7	10.54	12.71	10.5	8.18	6.85	5.09	8.08	5.28	6.33	7.72	14.25	12.4	9.77	14.11	6.94	5.48	11.06	6.31	10.15		CG3149	7.63667	7.69	11.2283	6.635	9.819		CG3149	0.04	0.902272	-0.04	-0.0488199	0.163167	0.764786
CG3156	5.84	4.62	7.31	6.96	4.59	7.29	5.39	2.5	5.6	2.53	6.72	2.91	8.04	5.83	5.01	5.8	6.01	6.73	4.04	5.02	4.11	6.79	2.92	3.58	6.96	6.88	5.64	7.69	6.29	3.59	3.32	5.9	5.92	4.61		CG3156	6.10167	4.275	6.23667	4.41	5.68		CG3156	0.02	0.960794	0.02	0.0336496	0.265498	0.899145
CG3163	7.29	12.92	5.03	5.53	15.29	7.19	5.06	6.83	10.72	7.39	9.48	6.27	5.29	16.62	13.12	9.44	14.73	17.72	7.16	6.14	7.59	4.44	6.08	7.59	8.12	11.02	11.15	7.62	11.12	7.28	6.88	13.88	5.75	6.57		CG3163	8.875	7.625	12.82	6.5	8.939		CG3163	0.17	0.683597	0.17	0.183872	0.241299	0.446054
CG3164	6.23	8.18	6.21	6.33	8.32	5.38	6.3	5.07	8.34	4.98	8.89	5.07	6.6	14.48	14.34	14.62	12.73	12.85	8.28	6.68	5.35	7.05	5.37	6.76	10.8	13.9	12.32	11.66	13.84	7.37	5.4	12.13	9.49	11.44		CG3164	6.775	6.44167	12.6033	6.58167	10.835		CG3164	1.47	0.0339047	1.47	0.398154	0.153879	0.00966896
CG3165	1.82	2.57	2.69	2.32	5.64	1.8	1.69	3.91	8.04	1.99	2.16	1.51	4.5	5.04	5.62	3.63	4.01	4.29	2.67	1.65	1.42	1.38	1.46	3.7	3.54	2.55	5.83	7.94	4.66	3.81	3.37	4.66	4.82	6.29		CG3165	2.80667	3.21667	4.515	2.04667	4.747		CG3165	0.01	0.988093	-0.01	-0.014375	0.375904	0.969495
CG3168	11.39	10.21	3.12	8.7	4.34	10.15	4.28	8.79	5.58	4.66	10.16	12.09	2.6	6.84	1.43	1.77	11.42	2.39	2.12	10.09	8.12	6.76	7.14	3.22	1.66	0.78	1.34	2.3	1.44	15.11	6.5	2.35	1.81	5.72		CG3168	7.985	7.59333	4.40833	6.24167	3.901		CG3168	1.52	0.0302984	-1.52	-1.36819	0.519894	0.00849639
CG3176	16.75	14.44	9.74	9.48	23.31	15.03	11.32	12.85	21.19	12.16	11.81	9.5	21.3	27.1	22.92	27.29	18.06	20.67	12.54	16.64	6.54	9.8	6.75	6.91	28.2	20.46	19.31	27.5	23.03	10.02	9.31	21.79	8.22	23.95		CG3176	14.7917	13.1383	22.89	9.86333	19.179		CG3176	0.46	0.345478	0.46	0.244766	0.176834	0.166311
CG3184	6.96	8.34	7.09	6.67	7.72	9.59	4.86	4.16	5.47	7.14	7.19	5.09	6.68	6.35	11.45	11.79	9.26	8.6	6.36	3.66	3.43	4.55	2.39	4.55	5.89	11.95	10.49	9.97	6.42	3.19	6.19	13.91	5.5	9.21		CG3184	7.72833	5.65167	9.02167	4.15667	8.272		CG3184	0.09	0.804555	0.09	0.105616	0.200367	0.598116
CG3191	6.22	4.83	9.13	8.67	3.81	2.1	7.13	6.57	3.79	1.81	1.67	3.88	3.1	1.1	1.99	1.65	2.02	3.38	6.69	4.36	1.49	6.11	7.75	4.45	3.52	2.97	2.09	3.95	1.12	4.23	6.27	2.46	5.08	5.21		CG3191	5.79333	4.14167	2.20667	5.14167	3.69		CG3191	2.03	0.0093427	-2.03	-1.49972	0.488353	0.00213364
CG3198	25.4	36.32	31.5	24.12	41.44	39.71	20.17	22.93	35.01	30.99	37.09	30.84	32.83	43.5	52.81	46.42	46.97	42.3	32.99	26.67	29.8	26.72	17.88	36.92	38.41	42.52	49.67	48.31	56.59	23.14	25.19	49.67	29.81	32.36		CG3198	33.0817	29.505	44.1383	28.4967	39.567		CG3198	0.01	0.967089	0.01	0.0126675	0.123308	0.918177
CG3199	0.34	0	0	0	6.73	0.17	0	0	7.27	0.87	0.37	0	0.26	6.47	1.51	1.66	2.19	3.32	0.95	1.49	0	0.92	0	0.2	0.16	0	1.75	9.91	3.25	0.16	0.31	6.47	0	0.38		CG3199	1.20667	1.41833	2.56833	0.593333	2.239		CG3199	0.08	0.836459	0.08	0.470802	1.03245	0.648388
CG3209	16.65	17.84	8.49	16.71	12.18	14.41	14.69	16.06	14.92	7.44	17.12	5.85	6.62	10.12	11.1	7.14	8.84	9.69	8.23	23.62	8.9	18.04	19.78	7.39	10.2	10	10.62	10.07	9.67	20.93	11.97	12.07	5.34	16.25		CG3209	14.38	12.68	8.91833	14.3267	11.712		CG3209	3.26	0.000551175	-3.26	-1.07852	0.274042	8.29927e-05
CG3213	3.28	2.55	2.12	2.33	34.75	2.41	1.18	1.19	70.41	2.36	0.51	0.11	1.65	35.48	1.48	16.28	38.54	22.33	3.78	13.86	0.24	4.09	1.11	1.32	6.87	0.14	4.19	28.01	5.69	7.64	4.79	14.41	3.95	8.14		CG3213	7.90667	12.6267	19.2933	4.06667	8.383		CG3213	0.05	0.90104	0.05	0.297832	0.982172	0.761709
CG3215	0.52	0	0.2	0.92	6.48	0.29	0	0.15	9.05	0.08	0	0	0.3	8.17	1.06	2.67	5.89	4.9	0.08	2	0.36	0.27	0	0	0.37	0	0	8.2	1.45	3.22	0.72	3.74	0.41	1.88		CG3215	1.40167	1.54667	3.83167	0.451667	1.999		CG3215	0.15	0.70039	0.15	0.825412	1.13009	0.46515
CG3216	0	0	0	0	0.14	0	0	0	0.08	0.03	0.08	0	0	0	0.04	0	0.1	0	0	0	0	0	0	0	0	0	0	0	0	0.03	0	0	0	0		CG3216	0.0233333	0.0316667	0.0233333	0	0.003		CG3216	0	NA	0	-0.54675	1.25799	0.663837
CG3222	0.61	0.63	0.35	0.43	5.75	0.63	0.04	0.05	13.57	0.89	0.25	0.05	0.35	8.76	0.45	4.76	9.02	4.8	0.88	2.35	0.11	1.2	0.5	0.13	0.66	0.13	0.77	7.37	1.02	1.11	1.22	4.96	1.32	2.46		CG3222	1.4	2.475	4.69	0.861667	2.102		CG3222	0.1	0.794751	0.1	0.539813	0.983743	0.583188
CG3223	7.38	7.49	9.07	7.11	15.15	7.32	7.54	7.12	18.44	9.58	11.35	7.3	12.67	25.25	17.15	17.7	18.82	19.72	10.61	9.67	5.81	7.63	6.54	11.06	15.3	19.05	11.76	17.99	17.01	10.67	9.2	18.62	6.5	12.6		CG3223	8.92	10.2217	18.5517	8.55333	13.87		CG3223	0.79	0.163112	0.79	0.331097	0.178816	0.0640832
CG3224	88.21	78.47	88	78.03	73.5	88.79	72.61	50.35	82.66	70.88	83.6	57.45	83.8	84.27	103.72	82.63	70.52	72.87	87.5	51.08	46.04	65.85	64.09	62.88	92.03	96.76	88.36	83.11	92.97	58.72	48.57	77.66	87.13	55.76		CG3224	82.5	69.5917	82.9683	62.9067	78.107		CG3224	1.22	0.0597796	-1.22	-0.299283	0.127577	0.0189815
CG3225	2.18	2.19	2.16	2.21	2.01	2	1.5	1.72	1.55	1.8	0.96	1.96	0.23	0.98	0.73	0.52	1.72	1.48	1.92	1.75	1.54	2.33	1.42	1.8	1.15	1.04	1.25	0.88	0.74	1.4	4.19	1.61	0.37	1.86		CG3225	2.125	1.58167	0.943333	1.79333	1.449		CG3225	2.22	0.00607612	-2.22	-1.31401	0.408581	0.0012997
CG3226	56.01	86.99	61.4	50.91	73.16	75.84	42.72	34.33	74.25	61.31	53.84	44.58	61.11	72.94	99.92	86.26	81.48	88.62	72.15	57.35	43.92	40.38	35.13	41.92	83.04	87.88	90.1	55.36	69.71	45.5	38.82	88.2	77.58	56.13		CG3226	67.385	51.8383	81.7217	48.475	69.232		CG3226	0.23	0.595484	0.23	0.107063	0.116205	0.356878
CG3246	35.9	31.35	29.41	31.93	20.71	32.73	36.68	19.85	19.69	19.02	43.47	27.17	15.72	16.84	9.08	5.93	14.06	13.15	26.24	32.46	18	29.38	22.33	13.39	21.12	10.27	7.39	7.65	7.81	16.17	26.78	10.42	10.73	14.87		CG3246	30.3383	27.6467	12.4633	23.6333	13.321		CG3246	5.13	7.35946e-06	-5.13	-1.67704	0.336428	6.2008e-07
CG3251	0.77	0	0.73	1.09	1.1	0.18	0.19	0	3.87	0	0.36	0.08	0.07	0.27	0	0	0.5	0.39	0.11	1.37	0	0.08	0	0	0.26	0	0	0.31	0	2.59	0.58	1.59	0	0.1		CG3251	0.645	0.75	0.205	0.26	0.543		CG3251	0	NA	0	-1.60605	1.12243	NA
CG3253	0.05	0	0.24	0.3	0.45	0.24	0.11	0.31	0.69	0.14	0.18	0.07	0	0.64	0	0.17	1.1	0.34	0.57	0.29	0.29	0.14	0	0	0.15	0	0	0.54	0.35	0.15	0.15	0	0	0.45		CG3253	0.213333	0.25	0.375	0.215	0.179		CG3253	0.01	0.968649	0.01	0.0806955	0.843117	0.92375
CG3257	0.05	0.02	0.05	0.06	0.19	0.11	0.03	0	0.47	0.01	0.04	0.04	0.04	0.25	0.15	0.19	0.4	0.33	0.08	0.07	0.02	0.08	0	0.07	0.02	0	0.62	0.1	0.04	0.26	0.01	0.09	0	0.17		CG3257	0.08	0.0983333	0.226667	0.0533333	0.131		CG3257	0.22	0.599436	0.22	0.739501	0.809675	0.361069
CG3259	0.13	0.06	0.23	0.32	0.22	0.23	0.29	0.24	0.67	0.3	0.14	0.35	0.12	0.12	1.13	0.46	0.6	0.54	0.09	0.14	0.89	0.73	0.27	1.5	0.66	0.42	0.12	0.18	0.4	0.3	0.42	1.46	0	0.22		CG3259	0.198333	0.331667	0.495	0.603333	0.418		CG3259	0	0.992428	0	0.0134005	0.542422	0.98029
CG3262	6.56	6.69	8.23	5.44	8.26	7.25	6.68	4.7	9.66	6.99	8.34	4.8	5.3	11.82	9.91	10.33	9.69	8.84	7.91	6.82	4.44	6.37	5.04	5.77	8.09	10.2	8.43	8.46	10	5.84	4.84	10.14	4.08	6.44		CG3262	7.07167	6.86167	9.315	6.05833	7.652		CG3262	0.18	0.658457	-0.18	-0.110688	0.13728	0.420075
CG3264	156.57	235.91	27.01	122.01	25.13	126.48	12.77	148.81	77.7	26.89	139.56	178.38	25.49	7.52	0.4	3.61	40.27	4.92	5.75	199.08	109.64	68.12	67.11	7.7	11.37	1.94	1.26	1.01	1.79	115.93	66.37	11.42	9.85	56.76		CG3264	115.518	97.3517	13.7017	76.2333	27.77		CG3264	3.19	0.000650869	-3.19	-3.08269	0.792538	0.000100392
CG3267	10.05	13.95	12.2	12.39	14.83	11.5	15.24	10.63	6.19	7.53	10.72	8.32	9.64	6.37	9.24	6.06	7.43	7.74	12.52	9.7	9.44	15.13	14.5	11.41	6.95	5.21	6.49	7.41	10.17	5.84	10.96	9.29	7.93	7.69		CG3267	12.4867	9.77167	7.74667	12.1167	7.794		CG3267	1.98	0.0105479	-1.98	-0.928292	0.30641	0.00244901
CG3270	34.12	37.28	12.48	35.51	19.54	30.19	13.8	21.28	20.94	15.48	17.53	33.86	17.23	22.06	23.82	24.01	25.75	24.5	13.29	28.53	18.31	16.62	18.35	15.73	13.92	21.7	20.38	16.92	20.76	31.33	22.64	20.85	16.31	22.22		CG3270	28.1867	20.4817	22.895	18.4717	20.703		CG3270	0.7	0.198052	-0.7	-0.464206	0.266787	0.0818612
CG3277	1.86	1.51	0.75	1.56	0.47	1.23	0.59	1.11	1.25	0.55	1.16	1.02	0.2	0.99	0.29	0.53	1.05	0.32	0.34	1.99	1.68	1.21	1.4	0.36	0.43	0.06	0.69	0.41	0.34	1.32	0.73	0.59	0.36	1.32		CG3277	1.23	0.946667	0.563333	1.16333	0.625		CG3277	2.19	0.00652855	-2.19	-1.31257	0.411158	0.00141111
CG3281	5.2	4.64	14.07	5.19	8.4	11.2	11.13	11.1	11.29	5.67	11.76	3.83	44.16	62.89	62.62	57.09	103.96	94.43	18.16	6.96	3.61	10.64	6.46	19.22	63.2	34.98	37.27	27.05	33.48	34.62	15.56	38.23	47.6	26.05		CG3281	8.11667	9.13	70.8583	10.8417	35.804		CG3281	12.64	2.28624e-13	12.64	2.34332	0.298352	4.02348e-15
CG3285	8.06	3.43	1.21	6.84	0.9	4.81	1	2.58	1.51	1.03	2.2	2.95	0.55	0.76	0	0.17	3.24	0.65	0.06	5.18	4.12	2.46	3.11	0.32	0.15	0	0	0.09	0	4.01	2.35	0.1	0	0.45		CG3285	4.20833	1.87833	0.895	2.54167	0.715		CG3285	1	0.0998349	-1	-1.53298	0.727569	0.0351189
CG3288	0	0	0.08	0.15	0.3	0	0	0	0.41	0	0.12	0	0	0.24	0	0.35	0.59	0.78	0	0.06	0	0	0	0	0	0	0	1.83	0.47	0	0	0.2	0	0		CG3288	0.0883333	0.0883333	0.326667	0.01	0.25		CG3288	0.26	0.549572	0.26	1.14839	1.14059	0.314015
CG3292	194.72	347.23	29.07	167.45	29.52	155.04	9.39	193.28	104.14	15.69	93.61	161.78	13.56	34.99	1.21	2.68	48.26	3.91	5.13	227.46	150.11	50.07	60.43	5.18	7.08	1.63	0.08	0	0.6	193.36	70.47	11.75	2.05	68.59		CG3292	153.838	96.315	17.435	83.0633	35.561		CG3292	2.62	0.00240569	-2.62	-2.82552	0.804872	0.000447235
CG3294	15.37	13.47	25.31	24.72	15.67	22.41	22.09	11.46	4.87	14.76	17.38	23.14	7.51	4.22	2.83	3.88	5.37	10.72	19.76	11.58	19.39	17.25	19.39	25.32	6.29	2.37	1.62	4.12	2.99	15.37	19.93	4.37	0.96	10.73		CG3294	19.4917	15.6167	5.755	18.7817	6.875		CG3294	3.95	0.000111144	-3.95	-1.99045	0.457102	1.33369e-05
CG3295	9.64	18.15	11.11	9.67	14.34	11.41	11.23	16.22	23.04	11.65	12.45	11.52	11.91	23.96	29.64	30.47	23.7	24.34	15	14.82	12.1	8.42	8.88	10.87	17.63	26.57	22.94	17.55	22.67	12.12	13.33	24.58	16.35	19.52		CG3295	12.3867	14.3517	24.0033	11.6817	19.326		CG3295	0.15	0.708498	0.15	0.153097	0.213827	0.474001
CG3301	16.72	15.62	26.5	29.9	18	28.49	35.87	15.03	5.41	25.38	2.68	18.99	2.14	2.95	0.46	0.17	1.15	17.34	16.68	10.97	22.48	23.91	17.38	23.1	1.25	3.85	0	0.36	0.34	14.23	8.2	1.18	0	7.77		CG3301	22.5383	17.2267	4.035	19.0867	3.718		CG3301	1.93	0.0116238	-1.93	-2.48143	0.828628	0.00274779
CG3306	0.1	0	0	0	1.29	0.15	0.05	0	5.12	0	0.11	0	0	1.52	0.15	1.07	3.22	2.55	0.12	0.5	0	0.21	0	0	0	0	0	3.47	0	0	0.56	0.19	0	0.85		CG3306	0.256667	0.88	1.41833	0.138333	0.507		CG3306	0.04	0.908127	0.04	0.329951	1.16133	0.776323
CG3308	11.89	11.27	13.71	13.11	11.36	13.15	13.06	12.94	9.74	13.39	9.82	12.15	8.23	12.16	11.56	11.05	10.52	14.09	12.36	11.45	14.36	10.77	11.91	14.63	6.42	11.57	14.04	11.09	11.77	8.56	11.03	13.49	5.79	9.97		CG3308	12.415	11.85	11.2683	12.58	10.373		CG3308	2.21	0.00615719	-2.21	-0.6897	0.214734	0.00131871
CG3309	4.15	5.22	7.88	4.14	6.59	4.81	5.22	4.13	8.5	5.88	6.51	3.59	5.22	7.62	7.6	9.77	6.8	6.38	5.54	3.99	5.55	4.07	3.16	6.33	6.44	9.03	7.33	7.33	9.45	2.42	2.28	8.39	6.06	5.57		CG3309	5.465	5.63833	7.23167	4.77333	6.43		CG3309	0.4	0.399363	-0.4	-0.184334	0.144608	0.202409
CG3323	1.04	0.87	0.12	0.75	3.58	1	0.2	0.11	6.13	0.84	1.48	0.29	0.44	4.1	0.54	2.26	3.8	2.09	0.28	1.3	0.51	0.97	0.14	1.06	1.26	0.32	0.39	5.5	1.44	1.72	0.5	2.38	0.72	1.23		CG3323	1.22667	1.50833	2.205	0.71	1.546		CG3323	0.04	0.918013	0.04	0.194498	0.747431	0.794693
CG3328	9.48	12.88	12.32	5.81	11.68	11.37	11.35	6.96	13.13	10.82	15.19	10.78	14.58	17.45	26.57	21.77	20.42	20.77	17.24	10.99	9.7	7.95	6.82	16.58	18.45	19.28	20.7	20.98	30.5	9.31	11.68	24.88	13.47	17.29		CG3328	10.59	11.3717	20.26	11.5467	18.654		CG3328	0.91	0.123541	0.91	0.270145	0.134987	0.0453635
CG3330	2.59	4.04	1.72	3.79	38.25	4.04	1.27	2.99	72.12	2.7	1.54	0.11	1.2	33.04	4.12	14.53	39.37	29.67	7.03	19.26	1.22	5.81	0	1.05	6.59	0	1.35	46.56	1.93	6.82	4.33	19.26	1.91	10.01		CG3330	9.07167	13.455	20.3217	5.72833	9.876		CG3330	0.04	0.907175	0.04	0.268328	0.937738	0.774768
CG3332	4.66	7.78	0.5	3.63	0.19	2.36	0.53	5.8	0.67	0.37	4.62	1.93	0.45	0.07	0.03	0	0.18	0.21	0.45	8.13	5.9	3.16	6.18	0.53	0.97	0.22	0.34	0	0.53	4.89	0.88	0.21	0.62	1.48		CG3332	3.18667	2.32	0.156667	4.05833	1.014		CG3332	4.81	1.53857e-05	-4.81	-3.9968	0.828855	1.42075e-06
CG3335	8.68	10.36	11.15	8.57	8.76	12.66	9.02	4.91	11.53	9.69	14.37	5.44	13.96	8.62	11.49	9.89	9.25	9.99	8.63	5.61	5.84	9.86	4.32	7.98	10.14	6.71	12.16	11.4	11.31	5.7	7.08	10.31	7.04	7.52		CG3335	10.03	9.16	10.5333	7.04	8.937		CG3335	0.38	0.415285	-0.38	-0.292568	0.23511	0.213357
CG3337	13.8	14.67	11.34	13.2	11.87	12.59	12.04	12.2	13.58	10.95	13.77	11.73	16.81	17.11	14.72	15.54	13.74	15.51	13.03	11.66	10.77	13.15	11.22	10.69	16.09	16.43	12.38	13.2	12.71	10.56	10.86	15.91	11.19	13.31		CG3337	12.9117	12.3783	15.5717	11.7533	13.264		CG3337	0.62	0.237656	-0.62	-0.242802	0.149003	0.103204
CG3339	0.1	0.05	0.05	0.03	0.05	0.04	0.04	0.01	0.02	0	0.03	0	0	0.2	0.09	0.06	0.1	0.03	0	0	0.01	0.01	0.03	0.04	0.05	0.03	0.07	0.31	0.2	0.03	0.03	0.03	0.09	0		CG3339	0.0533333	0.0166667	0.08	0.015	0.084		CG3339	0.81	0.156293	0.81	1.47292	0.785546	0.0607883
CG3342	5.7	5.97	5.84	3.8	8.73	6.39	4.46	3.89	4.91	6.07	5.36	4.94	5.35	8.49	8.69	7.13	8.3	7.58	4.69	5.28	4.83	4.16	1.89	5.07	6.59	6.75	6.35	5.1	7.72	5.9	4.06	4.6	3.45	3.93		CG3342	6.07167	4.93833	7.59	4.32	5.445		CG3342	0.04	0.908914	0.04	0.0438453	0.155514	0.777991
CG3344	38.67	143.58	6.57	33.01	3.49	4.07	1.61	102.04	24.05	2.12	44.8	2.39	6.51	2.55	0.76	2.02	0.57	27.3	0.06	185.85	205.22	47.66	80.11	6.92	5.2	1.96	0.4	0	0.8	114.58	24	3.53	1.12	0.96		CG3344	38.2317	29.5017	6.61833	87.6367	15.255		CG3344	1.46	0.0346358	-1.46	-2.41947	0.938375	0.00992687
CG3345	0.3	0.11	0.25	0.14	3.35	0.15	0.02	0.22	6.52	0.16	0.07	0	0	2.77	0.18	1.27	3.23	2.06	0.32	1.16	0.03	0.28	0	0.14	0.35	0	0.03	3.09	0.18	0.83	0.54	1.36	0.38	0.79		CG3345	0.716667	1.165	1.585	0.321667	0.755		CG3345	0.02	0.964295	0.02	0.120113	1.07013	0.910632
CG3347	1.04	0.39	0.93	0.98	8.67	0.78	0.73	0.52	10.21	0.56	0.29	0.06	1.01	3.62	0.39	2.43	7.64	2.07	1.58	2.01	0.67	0.6	0	0.68	1.06	0	0.95	5.94	1.26	1.9	1.45	5.25	1.37	2.37		CG3347	2.13167	2.06167	2.86	0.923333	2.155		CG3347	0.02	0.948627	0.02	0.145334	0.850046	0.864246
CG3348	722.96	322.54	367.06	381.23	152.27	359.03	264.14	449.55	306.8	224.4	426.57	469.97	233.61	237.87	124.64	136.01	159.7	112.86	270.24	472.13	264.51	514.29	600.52	168.93	276.77	139.37	114.14	144.76	149.46	259.23	326.7	172.15	155.04	216.68		CG3348	384.182	356.905	167.448	381.77	195.43		CG3348	5.07	8.58289e-06	-5.07	-1.65433	0.334189	7.41038e-07
CG3349	0.04	0.04	0	0	0	0	0	0	0	0.14	0	0.05	0	0	0	0.12	0.51	0	0	0	0	0	0	0.13	0.21	0	0	0	0	0	0	0	0	0		CG3349	0.0133333	0.0316667	0.105	0.0216667	0.021		CG3349	0.08	0.837058	0.08	0.614726	1.3521	0.649364
CG3355	0.21	0.15	0	0	0	0	0.22	0.49	0	0.45	0.69	0	1.12	0	0	0	0	0	0	0.69	0	0	0	0	0	0	0.11	0	0	0	0	0	0	0		CG3355	0.06	0.308333	0.186667	0.115	0.011		CG3355	0.09	0.805577	-0.09	-0.687476	1.30875	0.59938
CG3356	2.85	3.73	3.16	2.62	5.15	4.07	2.58	3.63	6.06	2.76	3.24	3.01	4.29	4.31	4.36	4.78	5.48	6	3.85	3.45	2.95	2.64	2.69	2.34	5.79	6.22	3.31	6.29	4.81	3.44	2.99	5.89	3.08	4.86		CG3356	3.59667	3.54667	4.87	2.98667	4.668		CG3356	0.08	0.834341	-0.08	-0.0902355	0.195382	0.644195
CG3358	17.13	18.03	20.53	12.29	19.53	23.28	13.99	11.25	25.85	13.46	22.37	17.27	19.75	22.3	23.54	17.56	17.87	21.55	17.26	10.09	12.76	11.55	11.58	14.59	19.81	16.37	17.88	20.96	16.51	12.06	12.59	16.43	15.23	15.96		CG3358	18.465	17.365	20.4283	12.9717	16.38		CG3358	0.81	0.154683	-0.81	-0.299471	0.159235	0.060015
CG3368	8.74	10.9	8.73	8.83	8.72	11.21	7.92	6.94	9.18	8.56	11.43	8.61	13.2	14.16	18.02	14.49	11.95	16.6	9.13	8.54	7.45	7.33	6.22	9.17	12.21	17.4	16.4	14.49	14.51	8.42	9	16.56	10.29	12.1		CG3368	9.52167	8.77333	14.7367	7.97333	13.138		CG3368	0.42	0.378092	0.42	0.179564	0.136332	0.1878
CG3376	14.1	16.52	15.08	9.22	16.96	18.53	14.14	9.37	24.18	13.57	28.39	15.55	23.55	59.72	30.27	28.47	22.79	25.19	24.08	12.45	10.14	13.17	8.62	16.08	27.25	28.08	24.7	22.54	26.62	13.15	15.19	33.1	21.78	19.82		CG3376	15.0683	17.5333	31.665	14.09	23.223		CG3376	0.36	0.432525	0.36	0.325125	0.268115	0.22527
CG3386	3.53	3.15	4.03	2.65	4.62	4.49	3.77	2.89	3.5	4.66	5.29	4.81	2.11	5.21	6.26	3.08	5.86	6.06	4.36	4.63	6.61	5.06	1.38	4.66	5.45	3.21	3.32	5.16	5.3	3.1	3.66	6.22	2.87	4.73		CG3386	3.745	4.15333	4.76333	4.45	4.302		CG3386	0.5	0.315032	-0.5	-0.388468	0.268161	0.14744
CG3394	8.18	8.92	2.63	9.14	8.34	5.94	4.95	10.65	14.19	7.59	4.45	4.71	2.5	23.77	5.43	6.38	6.8	6.98	3.73	22.16	5.8	4.68	6.28	2.41	2.91	7.79	6.08	7.81	5.66	4.87	2.35	4.63	3.95	11.6		CG3394	7.19167	7.75667	8.64333	7.51	5.765		CG3394	0.22	0.601793	-0.22	-0.428677	0.47168	0.36344
CG3397	0.28	0.79	0.22	0	0.2	0.11	0	0	1.25	0	0.08	0.45	0	0	0	0.59	1	0.35	0.35	0	0	0.78	0	0.37	0	5.24	0	0.74	0.64	0	0	0	0	0		CG3397	0.266667	0.296667	0.323333	0.25	0.662		CG3397	0.02	0.947123	-0.02	-0.217362	1.23544	0.860342
CG3402	11.79	16.47	17.08	10.87	21.04	16.88	14.2	9.61	21.85	17.06	23.33	15.78	19.76	23.41	32.62	29.61	26.6	27.86	16.41	14.82	13.92	9.06	8.77	21.91	23.28	23.72	21.82	24.33	29.46	12.78	10.26	28.61	19.83	18.82		CG3402	15.6883	16.9717	26.6433	14.1483	21.291		CG3402	0.16	0.684726	0.16	0.104046	0.136945	0.447396
CG3407	0.79	2.02	1.81	1.45	4.84	1.84	0.79	0.56	4.33	2.97	2.11	1.65	1.46	2.87	4.29	2.6	2.42	3.17	2.39	2	2.44	1.51	1.13	1.99	1.3	4.87	2.15	1.77	4.13	1.55	1.37	2.27	3.72	1.28		CG3407	2.125	2.06833	2.80167	1.91	2.441		CG3407	0.02	0.960401	-0.02	-0.0497811	0.386905	0.897623
CG3408	6.42	9.68	10.44	7.69	22.93	10.53	7.11	9.84	25.96	10.97	8.41	8.49	18.03	21.61	22.18	23.72	24.21	22.72	13.28	9.27	8.31	8.83	7.21	15.01	15.88	15.03	16.5	27.31	19.5	13.15	9.89	21.79	14.88	13.3		CG3408	11.2817	11.7967	22.0783	10.3183	16.723		CG3408	0.63	0.233748	0.63	0.387379	0.236246	0.101063
CG3409	0.76	1.04	0.88	0.94	1.39	1.09	0.71	0.62	1.02	0.87	1.47	0.93	0.84	1.86	1.49	1.42	1.32	1.08	1.11	1	0.73	1.06	0.44	1.01	1.02	0.71	1.45	0.99	1.24	1.12	0.83	1.05	0.36	1.25		CG3409	1.01667	0.936667	1.335	0.891667	1.002		CG3409	0.04	0.919058	-0.04	-0.0501968	0.195415	0.797277
CG3420	86.52	91.73	72.95	81.44	66.99	87.99	91.47	52.54	60.12	60.85	97.62	63.83	63.03	57.87	51.52	61.77	55.27	75.49	57.75	69.29	54.99	87.48	68.7	53.86	59.21	44.74	55.64	41.81	41.44	48.33	65.25	71.89	53.17	52.99		CG3420	81.27	71.0717	60.825	65.345	53.447		CG3420	3.05	0.000889172	-3.05	-0.788131	0.207256	0.00014313
CG3430	3.79	6.11	4.97	3.02	4.69	3.66	3.56	1.61	5.28	4.02	5.6	2.96	7	8.52	6.95	6.14	5.69	5.16	5.78	2.65	3.55	4.04	3.09	7.34	4.51	5.98	6.36	5.52	5.2	4.91	3.38	5.09	3.63	4.59		CG3430	4.37333	3.83833	6.57667	4.40833	4.917		CG3430	0.32	0.478391	0.32	0.253861	0.22414	0.257382
CG3434	7.92	11.83	12.52	8.55	14.47	15.59	10.91	5.27	15.05	9.9	15.09	7.57	18.67	13.63	14.31	17.12	12.4	20.36	16.5	8.33	7.48	11.84	5.09	11.13	18.24	13.15	11.62	16.93	13.71	5.78	10.76	16.99	6.79	13.71		CG3434	11.8133	10.6317	16.0817	10.0617	12.768		CG3434	0.06	0.867872	0.06	0.0854123	0.221698	0.700041
CG3436	38.88	46.44	42.78	35.04	50.02	43.61	34.71	25.91	46.7	43.01	47.09	36.85	60.51	49.77	62.13	54.34	52.34	58.16	45.46	35.96	40.31	32.31	29.71	44.86	58.4	51.66	72.54	52.31	60.54	39.86	32.78	65.27	41.04	46.36		CG3436	42.795	39.045	56.2083	38.1017	52.076		CG3436	0.02	0.958382	-0.02	-0.018413	0.131341	0.888508
CG3437	3.8	2.3	2.99	1.43	3.17	3.27	2.67	2.49	3.63	3.36	3.07	2.21	5.09	3.6	5.16	3.45	4.27	5.94	2.21	2.11	1.98	2.05	1.47	2.02	3.32	2.85	5.16	4.11	3.28	3.02	1.83	3.2	0.33	2.46		CG3437	2.82667	2.905	4.585	1.97333	2.956		CG3437	0.07	0.854452	0.07	0.0919549	0.219245	0.674911
CG3448	19.67	19.8	13.74	15.02	19.14	16.81	16.56	14.14	17.6	18.6	20.72	15.24	17.99	33.32	25.44	36.78	25.66	25.71	18.96	22.69	15.62	12.84	17.5	16.19	20.93	33.68	25.09	32.23	24.12	16.08	17.9	25.28	23.48	27.43		CG3448	17.3633	17.1433	27.4833	17.3	24.622		CG3448	0.14	0.72068	0.14	0.103421	0.149151	0.488058
CG3457	0.28	1.04	0.14	0.13	0.27	0.28	0	0.56	0.41	0.36	0.62	1.19	1.52	0.71	0.7	0.92	2.09	0	0.45	0.31	0.66	0	0	0	0	0	0	0	0	0.55	0	0.72	0	1.43		CG3457	0.356667	0.523333	0.99	0.236667	0.27		CG3457	0.06	0.868318	0.06	0.298661	0.777476	0.700873
CG3473	1.73	0.16	0	0.61	15.26	0.65	0	1.55	14.45	0.38	0	0	1.34	11.18	0	5.24	6.46	7.59	0.18	1.91	0.81	0.2	0	0	0	0.97	1.13	2	0.64	1.27	0.2	4.72	0	4.43		CG3473	3.06833	2.73	5.30167	0.516667	1.536		CG3473	0.07	0.849648	0.07	0.496605	1.15181	0.666356
CG3483	0	0	0.47	0	5.92	0.35	0.16	0	13.67	0.1	0	0	0	3.73	0.57	1.14	5.79	5.04	0	1.02	0.22	0.63	0	0	0	0	0.84	7.05	0	1.12	0.32	3.1	0	1.05		CG3483	1.12333	2.32167	2.71167	0.311667	1.348		CG3483	0	0.998386	0	-0.00729483	1.21187	0.995197
CG3491	1.39	0.48	0.94	0.76	3.59	0.66	0.61	0.24	6.84	0.34	0.34	0.03	1.2	2.31	0.3	1.42	4.39	2.18	0.56	2.11	0.08	1.02	0	0.34	1.92	0.03	0.16	3.2	0.35	1.68	1.08	2.31	0.27	2.18		CG3491	1.30333	1.4	1.96667	0.685	1.318		CG3491	0.03	0.930831	0.03	0.181152	0.808383	0.822686
CG3492	0.68	0.15	0	0.14	4.46	0.1	0.04	0.08	3.43	0.35	0.04	0	0.94	5.15	0.25	1.73	5.22	3.18	0.78	1.24	0.05	0.05	0	0.12	0.24	0	0.48	2	1.06	0.15	0.19	3.2	0	0.29		CG3492	0.921667	0.656667	2.745	0.373333	0.761		CG3492	0.65	0.225831	0.65	1.52474	0.918144	0.0967785
CG3494	0.21	0.24	0	0.38	1.22	0.56	0.11	0	11.98	0.62	0.18	0	0	3.65	0.64	1.14	4.18	2.54	0.13	0.88	0.15	0.73	0	0	0.38	0	0	6.38	0.72	0.7	0.59	2.36	0.84	0.36		CG3494	0.435	2.14833	2.025	0.315	1.233		CG3494	0.03	0.925469	-0.03	-0.263043	1.09785	0.810642
CG3500	20.5	17.19	20.09	20.5	13.28	18.23	19.69	13.2	18.42	14.95	25.18	15.3	12.59	18.82	17.34	21.44	16.01	22.92	16.79	19.53	13.63	15.37	10.51	12.89	23.28	23.67	20.86	17.68	15.19	10.38	14.33	14.98	8.68	18.26		CG3500	18.2983	17.79	18.1867	14.7867	16.731		CG3500	2.32	0.00482676	-2.32	-0.540665	0.164249	0.000995722
CG3502	0	0.03	0.22	0.03	0.24	0	0	0	0.41	0.06	0.05	0	0	0.28	0.05	0.54	0.2	0.22	0	0.07	0	0	0	0	0.1	0.2	0	0.27	0.3	0	0.02	0.02	0	0		CG3502	0.0866667	0.0866667	0.215	0.0116667	0.091		CG3502	0.19	0.652593	0.19	0.822511	1.00674	0.413925
CG3505	38.01	76.83	59.87	25.59	78.94	50.96	36.45	44.12	82.68	70.07	54.05	63.36	50.2	153.15	172.42	150.71	90.33	106.45	97.81	58.08	42.45	28.2	30.91	53.24	82.73	150.32	115.32	105.17	134.86	44.02	46.12	121.1	53.27	68.51		CG3505	55.0333	58.455	120.543	51.7817	92.142		CG3505	0.7	0.198185	0.7	0.44902	0.258129	0.0819431
CG3511	3	3.54	2.25	3.9	4.18	3.55	2.18	1.58	3.07	2.88	3.3	2.02	2.32	4.12	4.8	3.86	2.6	4.7	3.52	2.88	1.91	1.72	1.53	3.11	4.27	4.36	5.7	4.83	2.63	2.61	3.14	2.54	3.6	2.19		CG3511	3.40333	2.505	3.73333	2.445	3.587		CG3511	0.02	0.963652	0.02	0.0230269	0.196116	0.906531
CG3513	1.91	10.52	1.63	0.6	13.95	5.76	3.8	8.11	20.21	11.05	6.15	8.23	0.49	37.88	5.39	9.11	26.43	13.61	3.36	18.99	3.29	1.75	3.79	3.33	3.05	20.95	7.47	7.36	50.51	3.1	9.76	8.17	0	11.94		CG3513	5.72833	9.59167	15.485	5.75167	12.231		CG3513	0.03	0.942007	0.03	0.12013	0.626444	0.847927
CG3515	1.65	0.27	0	0.26	1.92	0.46	0.39	0.07	3.3	0.4	0.89	0.08	0.57	3.34	1.19	1.11	4.02	1.91	1.49	2.16	0	1.93	0.22	0.21	1.67	0.2	0.86	2.12	0.14	2.23	0.34	2.7	0.96	2.4		CG3515	0.76	0.855	2.02333	1.00167	1.362		CG3515	0.33	0.46926	0.33	0.818363	0.712337	0.250621
CG3517	0.33	0.76	0.06	0.26	4.86	0.11	0.04	0.04	14.2	0.47	0.08	0	0.08	6.37	0.7	3.4	5.51	4.93	0.48	2.32	0	0.4	0	0.5	1.61	0	0.79	7.02	0.16	0.95	0.35	2.5	0	1.85		CG3517	1.06333	2.47167	3.49833	0.616667	1.523		CG3517	0.03	0.939057	0.03	0.211107	1.05873	0.841952
CG3520	1.24	2.27	1.94	0.76	2.12	2.1	0.86	1.95	1.57	1.91	2.07	1.77	2.8	2.28	4.46	3.27	3.24	4.15	2.39	1.13	2.17	1.15	1.26	2.16	2.8	3.94	3.74	2.7	3.07	1.36	1.63	3.03	1.75	1.96		CG3520	1.73833	1.68833	3.36667	1.71	2.598		CG3520	0.57	0.270913	0.57	0.403051	0.26019	0.121366
CG3526	0.81	0.4	0.39	0.29	2.67	0.49	0.14	0.14	3.62	0.21	0.1	0.06	0.38	1.24	0.31	0.81	2.12	1.07	0.65	1.33	0.25	0.51	0	0.15	1.54	0.12	1.55	2.03	1.03	1.13	0.6	1.8	0.23	1.16		CG3526	0.841667	0.711667	0.988333	0.481667	1.119		CG3526	0.03	0.942007	0.03	0.153488	0.802437	0.848308
CG3527	9.83	12.17	12.82	9.51	9.94	12.89	10.09	5.87	12.85	10.15	12.68	7.7	16.03	13.88	17.06	23.86	13.2	11.84	12.32	8.01	7.2	10.03	7.52	9.61	17.73	16.78	11.73	12.66	17.76	6.61	9.49	17.2	8.93	11.27		CG3527	11.1933	9.89	15.9783	9.115	13.016		CG3527	0.15	0.709818	0.15	0.142712	0.20005	0.475608
CG3528	0	0	0	0.16	2.2	0.25	0	0	4.05	0	0	0	0	2.25	0	0.36	2.46	4.87	0.4	0.12	0	0	0	0.29	0	0	0	0.29	0	0.08	0	0.74	0.52	0		CG3528	0.435	0.675	1.65667	0.135	0.163		CG3528	0.08	0.822562	0.08	0.648982	1.32642	0.624649
CG3529	7.3	6.71	4.93	6.17	6.81	6.93	5.17	5.68	6.11	5.69	6.02	5.92	6.36	11.28	8.58	10.68	8.26	7.6	6.47	8	6.05	4.66	5.84	5.48	6.43	9.44	8.54	11.04	9.13	5.82	5.75	7.58	8.14	8.44		CG3529	6.475	5.765	8.79333	6.08333	8.031		CG3529	0.02	0.964055	0.02	0.0176494	0.156044	0.909947
CG3530	4.26	3.82	3.57	3.33	3.85	4.55	3.01	3.7	4.56	3.8	3.99	2.85	3.7	6.28	5.8	6.46	4.74	4.8	3.89	3.07	2.98	2.68	3.01	3.11	4.9	5.76	4.68	4.68	5.54	3.26	3.7	5.56	5.51	5.15		CG3530	3.89667	3.65167	5.29667	3.12333	4.874		CG3530	0.05	0.900961	-0.05	-0.040406	0.132755	0.76085
CG3534	13.38	14.68	13.53	13.36	11.29	11.04	13.17	11.41	13.49	8.34	11.09	8.39	9.73	8.21	11.21	8.97	8.59	9	10.86	10.54	7.92	11.11	10.31	8.76	13.51	10.78	8.53	7.18	11.5	9.95	9.87	13.22	5.18	11.17		CG3534	12.88	10.9817	9.285	9.91667	10.089		CG3534	4.03	9.42251e-05	-4.03	-0.814033	0.185217	1.10763e-05
CG3542	25.7	33.59	29.63	25.36	38.92	35.92	21.02	19.9	39	26.87	29.26	27.57	48.4	39.49	47.89	50.14	41.43	41.15	35.49	18.61	19.96	24.11	16.07	39.55	47.98	38.3	40.74	49.75	48.06	25.2	23.55	49.41	36.9	28.07		CG3542	31.52	27.27	44.75	25.6317	38.796		CG3542	0.38	0.413241	0.38	0.174563	0.139795	0.211773
CG3544	2.07	1.92	0.34	1.8	0.4	1.5	0.35	1.01	1.58	0.62	1.19	1.81	0.16	0.25	0.16	0.38	0.84	0.32	0.2	0.82	0.62	0.6	1.28	0.28	0.45	0	0	0.42	0	0.76	1.32	0.31	0.51	0.83		CG3544	1.33833	1.09333	0.351667	0.633333	0.46		CG3544	3.88	0.000131042	-3.88	-2.1255	0.492797	1.60961e-05
CG3546	0.71	0.38	0.49	0.06	0.2	0.52	0.29	0.11	0.15	0.36	0.97	0.2	0.21	1.11	0.99	1.32	0.58	0.34	0.31	0.15	0.48	0.47	0.41	0.28	1.28	0.23	0.93	1.31	1.43	0.57	0.03	0.7	1.44	0.35		CG3546	0.393333	0.346667	0.758333	0.35	0.827		CG3546	0.26	0.55486	0.26	0.566637	0.568084	0.318544
CG3548	3.82	5.48	4.3	3.01	7.04	5.44	4.46	2.33	4.34	5.8	5.91	5.28	5.22	9.54	10.83	9.94	9.32	7.81	6.5	2.25	4.6	3.38	2.12	7.62	5.74	7.45	9.49	5	10.24	4.41	2.19	9.8	4.82	3.83		CG3548	4.84833	4.68667	8.77667	4.41167	6.297		CG3548	0.57	0.269984	0.57	0.326202	0.210302	0.120875
CG3552	5.87	5.08	4.89	3.05	6.91	6.09	3.84	5.2	5.89	5.75	6.94	3.01	9.32	7.55	6.79	5.47	8.29	9.75	6.4	3.67	3.51	3.81	2.67	4.46	5.68	5.82	6.27	9.02	5.75	3.28	4.67	7.22	6.61	5.83		CG3552	5.315	5.105	7.86167	4.08667	6.015		CG3552	0.06	0.87888	0.06	0.0833441	0.231162	0.718441
CG3556	0.34	0.31	0.32	0.64	2.69	1.73	0.62	0.37	0.56	1.21	0.21	0.14	0.5	0.31	0.23	0.23	0.43	1.6	0.2	0.53	1.27	1.43	0.49	1.64	0.51	0.16	0.46	0.39	0.2	0.26	0.68	0.64	0.12	0.27		CG3556	1.005	0.518333	0.55	0.926667	0.369		CG3556	0.16	0.698597	-0.16	-0.442498	0.602588	0.462748
CG3557	1.44	1.83	1.76	0.99	6.54	1.73	0.47	0.3	13.37	1.36	1.89	0.82	0	8.69	2.6	5.18	7.73	9.74	2.3	4.23	1.82	1.5	0.77	2.08	1.29	1.08	1.95	5.44	3.23	1.16	1.32	4.4	1.57	0.59		CG3557	2.38167	3.035	5.65667	2.11667	2.203		CG3557	0.11	0.768807	0.11	0.489808	0.815935	0.548305
CG3558	26.07	44.17	41.66	20.57	31.89	32.33	26.96	30.8	58.76	38.53	42.45	27.79	104.15	103	124.9	120.71	97.57	86.49	60.45	32.84	27.34	25.11	20.79	53.7	103.05	109.34	130.77	128.05	137.09	54.31	42.76	121.23	93.26	86.4		CG3558	32.7817	37.5483	106.137	36.705	100.626		CG3558	9.81	1.55514e-10	9.81	0.967692	0.139629	4.19508e-12
CG3565	0.71	0.45	0	0.14	5.49	0.46	0.43	0	14.56	0.66	0.11	0	0	7.21	0.45	5	7.63	4.65	1.11	3.57	0.28	0.97	0.24	0	0.44	0	0.32	9.46	2.26	1.48	0.99	4.28	0	2.41		CG3565	1.20833	2.62667	4.15667	1.02833	2.164		CG3565	0.04	0.911466	0.04	0.308723	1.11751	0.782348
CG3566	89.22	89.16	67.11	70.3	57.29	77.87	70.72	63.08	75.98	73.71	92.64	68.5	72.94	92.57	96.82	85.45	72.81	79.83	78.4	79.83	50.33	56.48	45.77	49.68	77.98	91.25	81.85	59.86	65.14	67.89	60.81	84.61	50.73	65.5		CG3566	75.1583	74.105	83.4033	60.0817	70.562		CG3566	2.83	0.00146466	-2.83	-0.403849	0.110365	0.000252984
CG3568	2.72	3.37	5.62	1.68	4.72	3.03	3.79	1.05	6.2	3.72	5.3	1.85	13.03	12.61	13.55	15.47	10.46	10.62	5.65	3.01	1.86	3.4	1.87	4.7	12.15	14.63	14.97	12.4	12.78	4.54	3.76	14.92	8.59	9.38		CG3568	3.52333	3.65167	12.6233	3.415	10.812		CG3568	4.22	6.01486e-05	4.22	1.28242	0.284524	6.56784e-06
CG3570	9.34	8.27	7.32	6.89	13.49	10.93	6.54	4.8	10.96	9.97	10.68	5.82	9.77	11.22	11.86	14.73	11.97	9.76	7.67	8.83	6.38	6.1	3.34	6.43	15.67	11.57	11.55	9.64	7.83	10.25	3.78	12.23	10.17	7.73		CG3570	9.37333	8.12833	11.5517	6.45833	10.042		CG3570	0.03	0.938058	-0.03	-0.0337594	0.164466	0.837364
CG3581	0.45	0.39	0.31	0.56	13.22	0.45	0.21	0.89	24.19	0.97	0.22	0	0	14.35	1.48	5.83	11.83	7.52	0.91	4.72	0.35	2.12	0.3	0	2.58	0	0.16	10.26	0.67	1.31	3.12	4.69	1.1	4.32		CG3581	2.56333	4.41333	6.835	1.4	2.821		CG3581	0.04	0.916706	0.04	0.277933	1.0569	0.792574
CG3587	9.01	7.53	9.62	9.47	12.18	11.34	9.67	8.08	8.82	8.15	8.29	7.75	14.35	10.4	12.84	11.03	9.82	9.61	8.53	9.23	6.58	7.11	4.38	6.26	7.57	9.78	7.71	6.66	10.64	5.86	4.66	10.44	5	6.12		CG3587	9.85833	8.46	11.3417	7.015	7.444		CG3587	0.17	0.682538	-0.17	-0.156352	0.204643	0.444853
CG3588	18.68	8.47	14.05	15.16	9.55	10.73	17.86	11.17	2.11	14.91	3.73	19.04	2.64	0.4	0.3	0.22	0.52	4.88	13.67	12.45	11.65	14.73	9.15	13.74	2.19	0.53	0.9	0.55	0.39	12.95	18.5	1	1.77	9.7		CG3588	12.7733	11.47	1.49333	12.565	4.848		CG3588	3.81	0.000155217	-3.81	-3.25408	0.761985	1.95011e-05
CG3589	1.96	2.62	2.94	1.72	2.22	2.07	2.8	2.1	4.81	2.22	2.74	2.82	3.42	6.67	5.09	5.71	2.49	2.89	2.8	3.51	2.69	1.7	3.11	3.92	4.35	4.24	3.56	6.36	3	2.68	3.78	4.32	5.05	3.13		CG3589	2.255	2.915	4.37833	2.955	4.047		CG3589	0.02	0.964473	0.02	0.0306898	0.27435	0.910932
CG3592	0	0	0	0	0	0	0	0	0	0	0	0	0	0	0	0	0	0	0	0.2	0	0	0	0	0	0.1	0	0	0.14	0	0	0	0	0		CG3592	0	0	0	0.0333333	0.024		CG3592	0	NA	0	NA	NA	NA
CG3594	22.54	20.34	22.22	21.44	22.63	30.7	21.61	7.89	17.82	21.84	26.87	13.23	26.26	16.45	27.19	18.27	22.07	18.2	16.65	12.95	12.99	21.83	9.79	14.52	24.24	19.21	16.76	18.47	25.8	13.58	17.09	18.89	14.08	12.79		CG3594	23.3117	18.21	21.4067	14.7883	18.091		CG3594	0.31	0.494613	-0.31	-0.293229	0.265724	0.269807
CG3597	1.12	1.87	1.78	1.38	5.03	1.13	0.98	1.97	5.81	0.88	0.88	2.57	0.52	1.02	1.34	1.67	2.46	1.72	1.05	2.11	0.79	0.62	0.85	1.11	0.22	1.5	1.76	1.17	2.34	0.66	1.36	2.59	3.66	0.7		CG3597	2.05167	2.18167	1.455	1.08833	1.596		CG3597	1	0.099801	-1	-1.0665	0.506086	0.0350867
CG3598	1.32	0.16	0.45	1.25	0.14	0.37	0.52	0	0.16	0	0.66	0.06	1.03	2.46	1.47	0.08	1.37	0.08	0.12	0.33	0.14	0.07	0	0.34	1.41	0.41	1	2.13	1.1	0.36	0.48	1.51	1.7	0		CG3598	0.615	0.233333	1.08167	0.166667	1.01		CG3598	0.71	0.197218	0.71	1.46927	0.84298	0.0813424
CG3603	2.08	2.47	3.85	2.61	2.97	1.57	6.71	6.15	8.11	1.05	1.79	1.62	1.98	4.09	2.4	3.2	2.58	0.62	1.09	3.81	2.2	4.87	8.5	1.89	2.04	5.69	2.22	3.77	2.64	2.97	5.4	1.09	2.83	5		CG3603	2.59167	4.23833	2.47833	3.72667	3.365		CG3603	1.22	0.06093	-1.22	-1.30039	0.556404	0.0194326
CG3604	72.05	34.08	11	27.93	7.91	13.75	37	15.16	11.83	2.12	12.71	33.1	3.4	1.73	0.24	1.07	0.91	6.42	4.75	36.33	3.67	57.49	23.86	3.69	2.34	0.27	2.8	0	0.73	43.34	158.85	5.01	0	52.47		CG3604	27.7867	18.6533	2.295	21.6317	26.581		CG3604	4.63	2.36573e-05	-4.63	-3.38046	0.715472	2.30352e-06
CG3609	54.31	89.01	42.34	50.88	56.22	70.03	55.21	108.99	55.21	116.71	31.99	51.06	33.92	54.36	70.31	58.67	30.56	38.79	43.12	103.36	45.99	33.84	47.09	29.24	32.05	59.46	51.76	35.74	52.82	26.48	87.78	52.75	23.11	47.48		CG3609	60.465	69.8617	47.7683	50.44	46.943		CG3609	2.13	0.00746566	-2.13	-1.18495	0.376502	0.00164816
CG3610	0.18	0.24	0	0.09	1.39	0.09	0	0	2.17	0	0	0	0	1.24	0.18	0.05	0.81	1.69	0	0	0	0.12	0	0	0	0	0	0.05	0	0.4	0	1.75	0	0.41		CG3610	0.331667	0.361667	0.661667	0.02	0.261		CG3610	0.06	0.880888	0.06	0.454172	1.27198	0.721047
CG3611	0.1	0.46	0	0	0.89	0.08	0	0	2.46	0.07	0	0	0	1.89	0	0.51	1.09	1.19	0	0.23	0	0	0	0	0.15	0	0	2.16	0	0.08	0.07	0.2	0	0		CG3611	0.255	0.421667	0.78	0.0383333	0.266		CG3611	0.05	0.886005	0.05	0.437887	1.27578	0.731425
CG3618	3.94	7.18	5.53	2.22	8.41	6.23	3.71	4.17	8.99	7.29	6.08	4.31	4.38	9.77	12.62	11.49	8.05	6.85	5.64	4.79	4.46	3.34	2.49	5.16	7	8.93	9	8.86	7.17	3.2	2.97	13.06	1.07	5.66		CG3618	5.585	5.75833	8.86	4.31333	6.692		CG3618	0.04	0.903182	0.04	0.067245	0.226246	0.766298
CG3625	16.12	11.83	10.07	15.05	10.12	13.66	11.92	14.07	12.47	9.29	12.08	11.25	3.23	12.9	6.17	5.73	10.29	9.6	7.7	16.58	10.25	11.82	16.82	7.11	5.48	9.16	6.34	5.6	6.58	8.79	6.69	5.64	1.58	9.22		CG3625	12.8083	11.8467	7.98667	11.7133	6.508		CG3625	3.39	0.00041031	-3.39	-1.1829	0.294545	5.91892e-05
CG3626	0.71	0.97	0.87	1	1.56	1.08	1.05	0.47	1.98	0.81	0.89	1.08	0.56	1.57	2.05	1.33	1.58	1.43	1.07	0.43	0.58	1.38	1.5	1.52	1.6	1.42	1.75	1.4	1.6	0.97	1.55	1.19	1.34	1.32		CG3626	1.03167	1.04667	1.42	1.08	1.414		CG3626	0.05	0.883577	-0.05	-0.103464	0.29507	0.725858
CG3630	1.98	1.43	1.86	2.77	2.71	2.2	2.9	1.09	0.98	1.7	1.33	1.14	0.85	1.45	1.06	1.09	0.63	1.69	3.34	0.64	1.39	2.7	3.09	3.83	1.11	0.58	0.62	0.78	1.23	1.43	1.72	0.92	0.77	0.78		CG3630	2.15833	1.52333	1.12833	2.49833	0.994		CG3630	1.82	0.0153037	-1.82	-1.03047	0.356316	0.00382774
CG3631	5.01	6.21	6.29	4.34	6.61	6.39	5.63	3.77	8.39	5.47	7.76	4.71	7.63	9.71	10.05	8.44	8.65	9.36	4.58	4.41	3.92	5.42	2.8	8.03	11.62	6.03	8.48	10.72	12.51	6.63	6.4	10.8	10.05	4.08		CG3631	5.80833	5.955	8.97333	4.86	8.732		CG3631	0.06	0.866656	0.06	0.0442773	0.113822	0.697273
CG3632	2.72	3.7	3.3	3.24	5.4	2.54	2.45	4.55	6.56	2.95	3.68	3.82	2.86	5.3	4.88	4.97	6.02	5.23	3.8	3.02	3.54	2.51	2.14	3.84	4.24	6.41	5.49	7.47	6.97	3.61	2.44	4.41	1.95	4.35		CG3632	3.48333	4.00167	4.87667	3.14167	4.734		CG3632	0.41	0.389524	-0.41	-0.288741	0.22309	0.195569
CG3634	3.54	6.78	5.84	4.36	11.23	5.28	7.42	3.98	10.77	6.61	6.55	5.81	5.75	11.71	14.38	12.97	11.12	9.87	9.12	4.84	5.14	4.28	6.57	8.93	9.44	10.36	8.22	9.85	11.5	7	8.07	10.93	3.1	11.73		CG3634	6.17167	6.85667	10.9667	6.48	9.02		CG3634	0.13	0.740972	0.13	0.121505	0.18567	0.512845
CG3635	2.69	3.64	2.15	3.33	1.64	1.93	2.68	3.75	3.47	2.45	2.66	1.05	3.39	2.77	4.33	4.65	2.3	2.42	1.92	4.55	2.43	3.37	3.15	1.75	2.72	3.73	3.5	3.47	4.07	3.54	2.65	2.9	1.78	6.19		CG3635	2.56333	2.67667	3.31	2.86167	3.455		CG3635	0.2	0.624988	-0.2	-0.268418	0.310536	0.387385
CG3638	2.87	4.56	3.97	2.96	6.03	4.85	3.18	3.34	5.37	4.29	4.64	3.73	9.74	12.72	16.45	12.99	11.65	9.71	5.86	3.35	3.76	3.03	2.86	8.49	8.87	9.36	13.74	11.43	18.54	5.79	5.53	12.85	8.89	7.78		CG3638	4.20667	4.09167	12.21	4.55833	10.278		CG3638	14.34	4.58902e-15	14.34	1.01286	0.121294	6.79763e-17
CG3640	23.28	16.8	3.17	23.3	2.47	14.06	11.83	21.34	6.77	7.75	12.37	1.4	2.68	1.02	0.14	0.16	1.82	0.4	0.35	28.88	16.24	16.77	15.46	2.6	2.97	0.08	0.08	0.17	0.97	15.53	3.68	1.76	0	11.39		CG3640	13.8467	10.2433	1.03667	13.3833	3.663		CG3640	5.21	6.19855e-06	-5.21	-3.56662	0.710242	5.12158e-07
CG3645	1.07	1.05	1.33	1.06	1.59	1.21	0.6	0.88	2.28	1.06	1.46	0.99	1.13	1.76	1.87	1.27	1.98	1.91	0.96	0.97	0.92	0.8	0.56	1.18	1.99	1.52	1.24	2.15	1.7	1.01	0.9	1.51	1.3	0.94		CG3645	1.21833	1.21167	1.65333	0.898333	1.426		CG3645	0.04	0.903182	-0.04	-0.0674696	0.227197	0.766493
CG3649	2.6	2.28	1.96	1.17	2.73	1.84	1.06	1.58	3.8	2.42	2.57	3.81	4.01	8.71	7.89	6.26	5.42	6.72	4.84	2.93	1.61	1.9	2.34	3.98	4.24	6.84	6.56	5.34	8.54	1.9	2.33	7.25	0	4.39		CG3649	2.09667	2.54	6.50167	2.93333	4.739		CG3649	1.57	0.0271646	1.57	0.783872	0.293202	0.00750658
CG3650	0	0	0	0.12	0	0	0	0	0	0	0.28	0	0	0	0	0	0	0	0	0	0	0	0	0.59	0.61	0	0	0	0	0	0	0	0	0		CG3650	0.02	0.0466667	0	0.0983333	0.061		CG3650	0	NA	0	-0.66228	1.34856	0.623355
CG3651	3	2.83	2.95	1.97	5.48	3.79	2.72	2.88	4.92	3.76	3.82	3.03	3.48	6.95	6.79	8.18	6.65	6.4	4.85	3.24	3.19	3.04	2.59	3.82	6.01	5.55	6.79	7.26	7.57	4.26	2.86	7.04	5.56	4.88		CG3651	3.33667	3.52167	6.40833	3.455	5.778		CG3651	1.05	0.0893477	1.05	0.298254	0.137997	0.030671
[truncated: 16,243 more rows]
[truncated: 7 more columns]
